# Supplementary material for: Comparative Metabolomic Studies of Siberian Wildrye (Elymus sibiricus L.): A New Look at the Mechanism of Plant Drought Resistance
Source: MDPI journal article supplement (doi:10.3390/ijms24010452), 2022-12-27

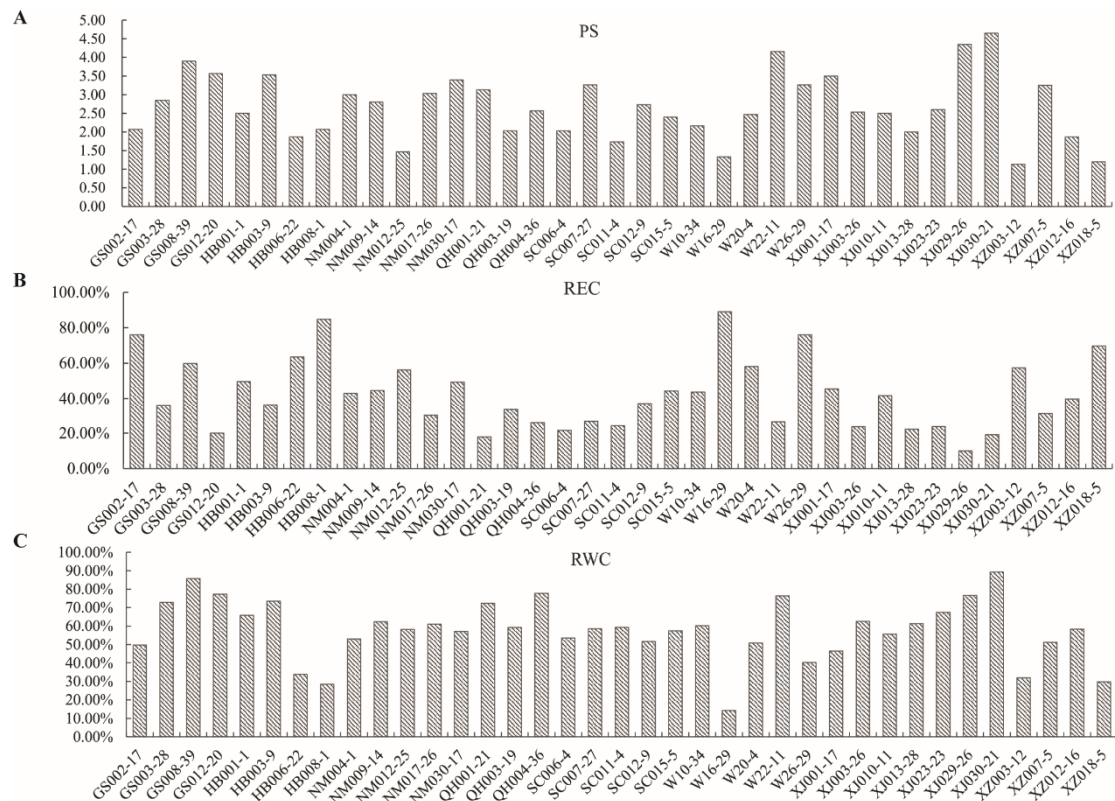

**Figure S1.** Phenotypic histogram of 37 wild *E. sibiricus* accessions. **A** shows the phenotypic score (PS), **B** shows the relative electrical conductivity (REC), and **C** shows the relative water content (RWC).

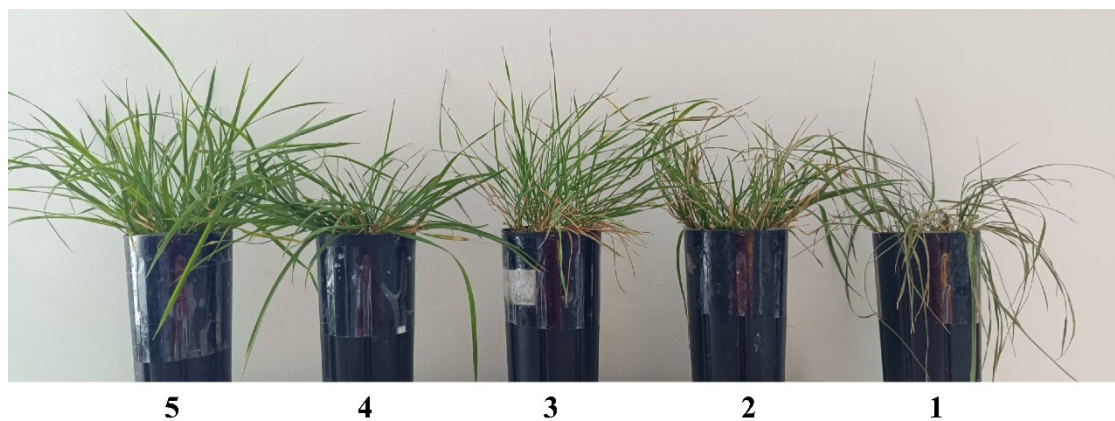

**Figure S2.** The phenotypic scoring reference diagram of *E. sibiricus* shows 5, 4, 3, 2, and 1 points from left to right.

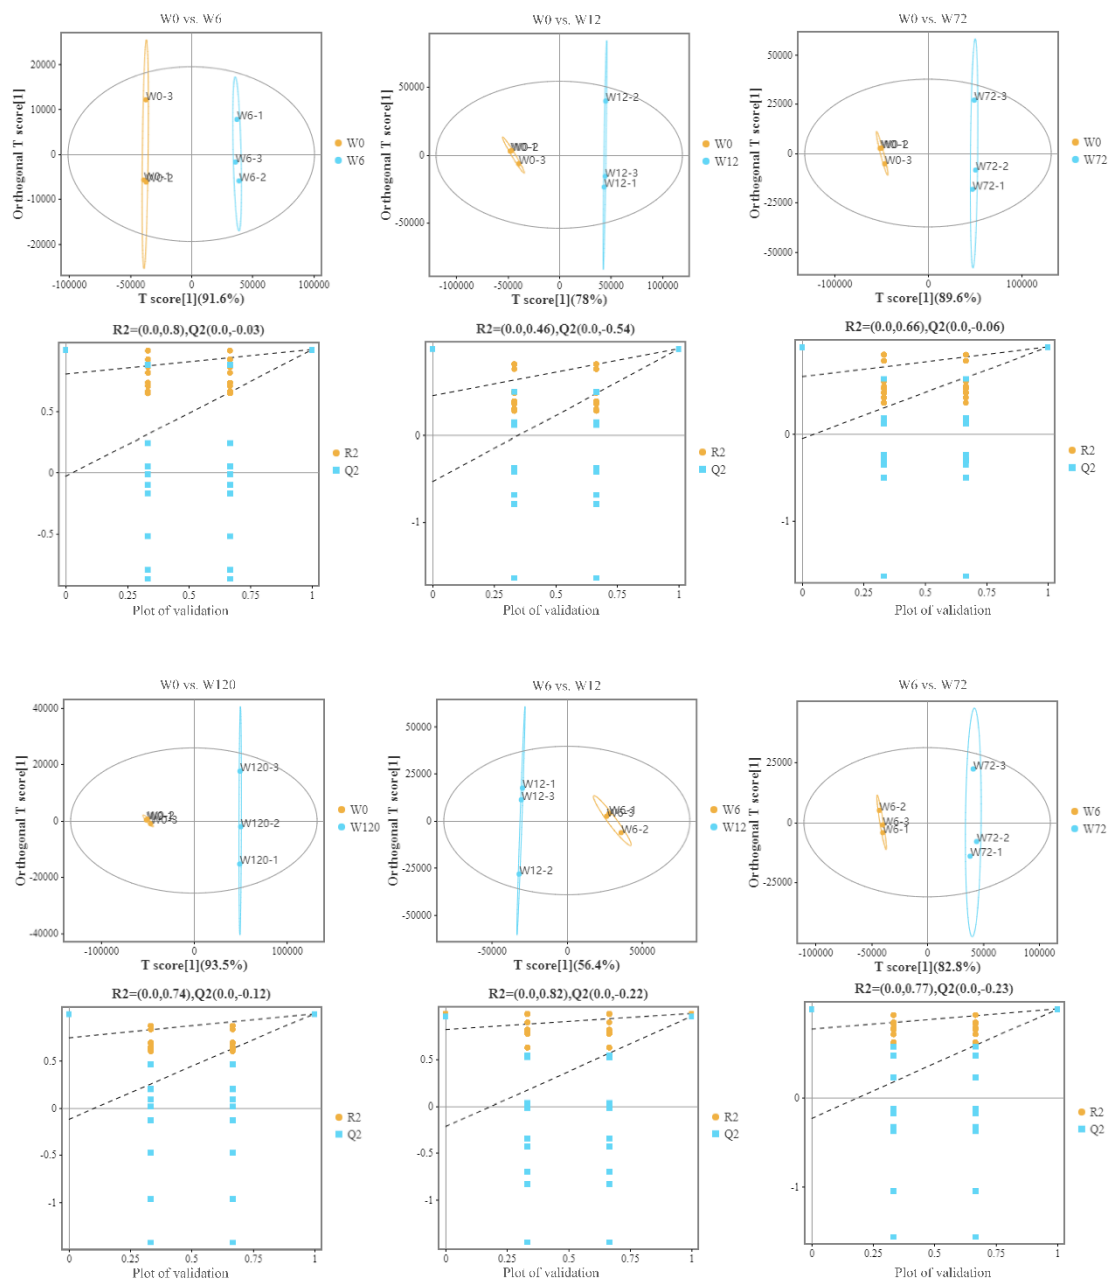

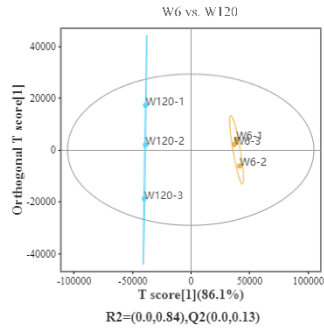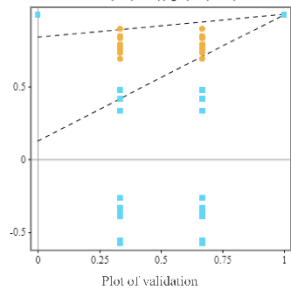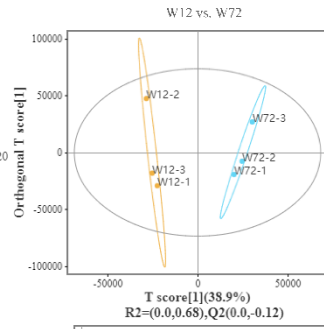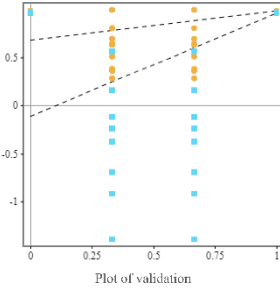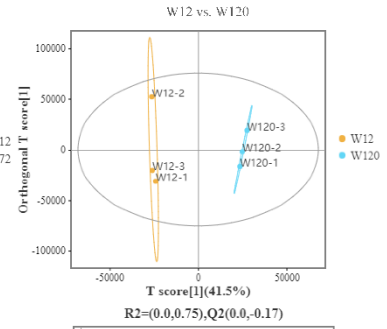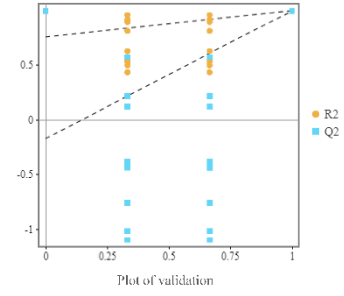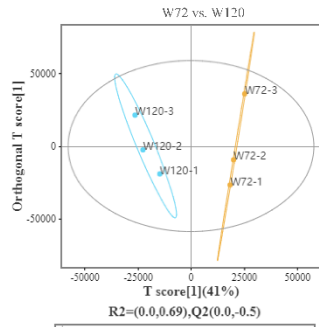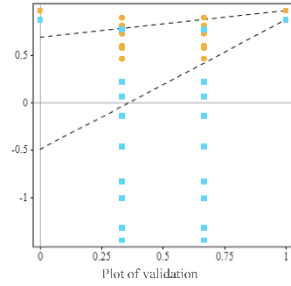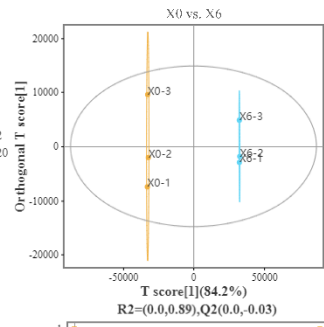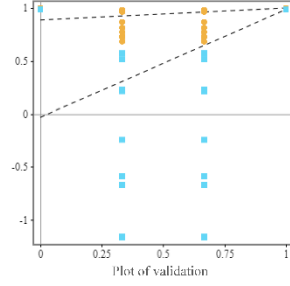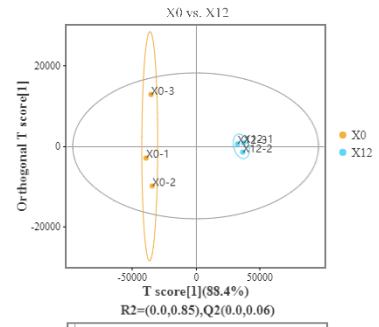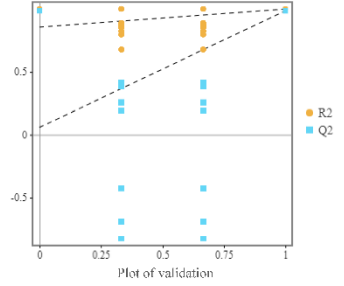

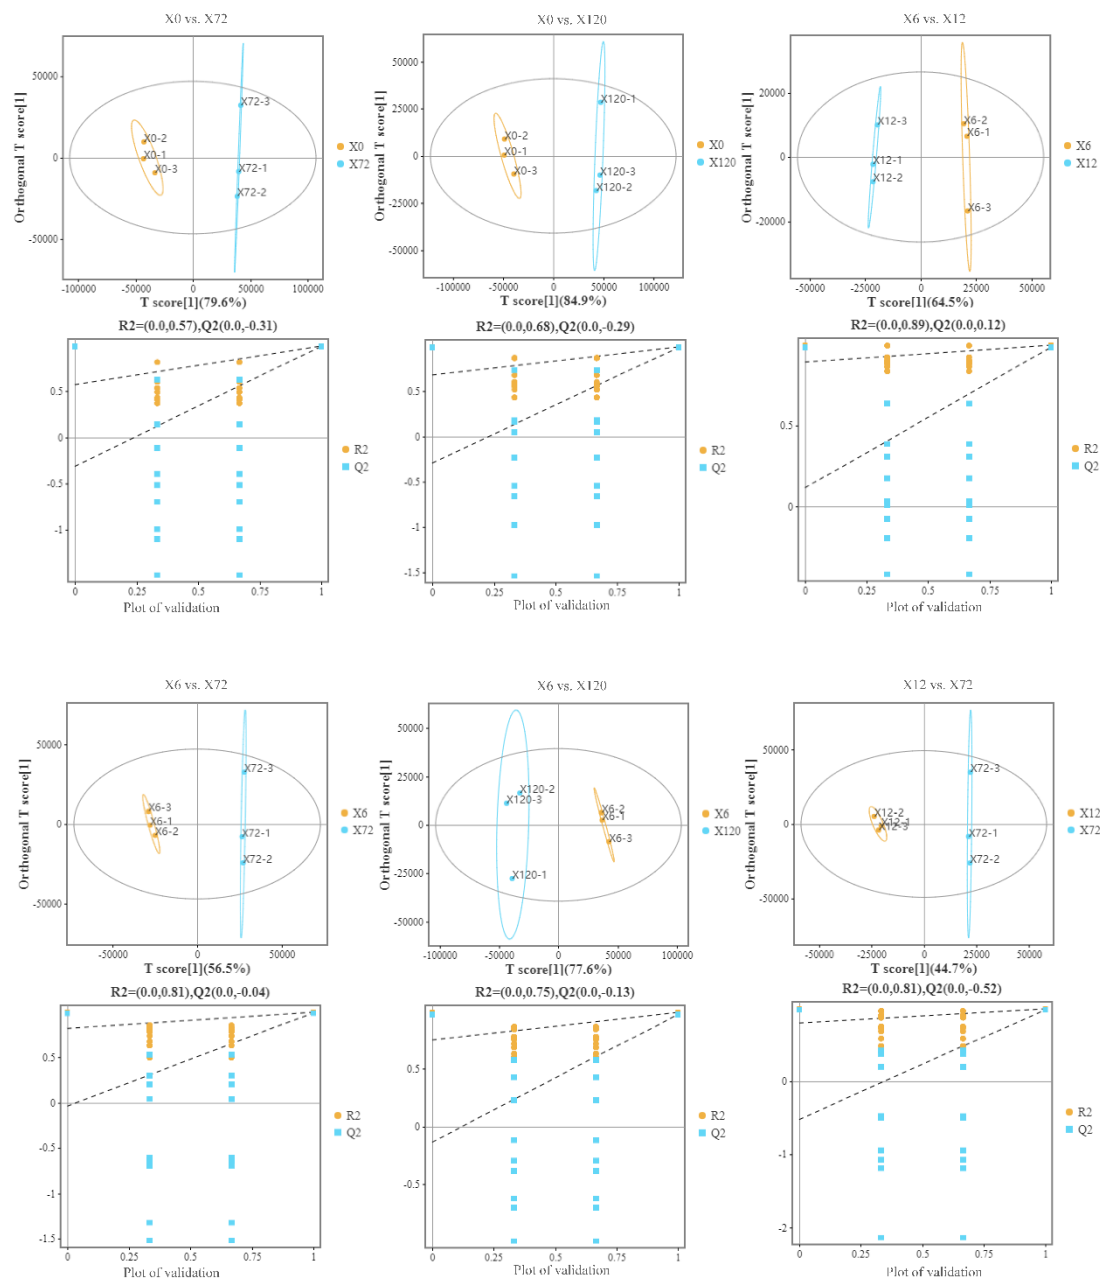

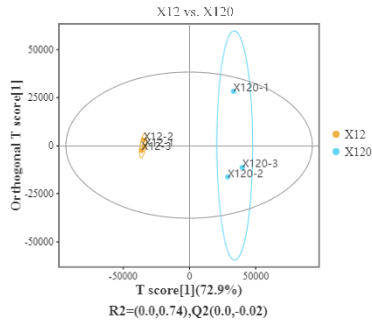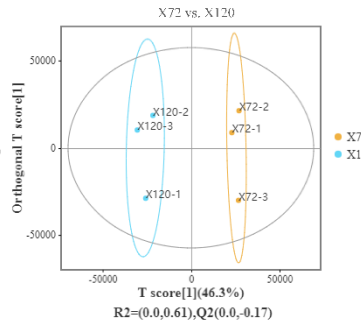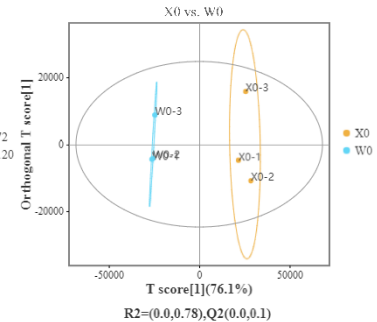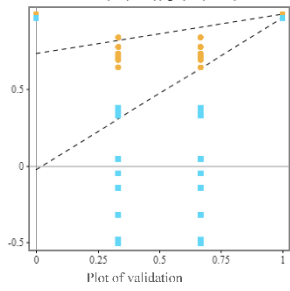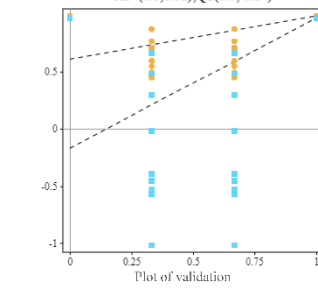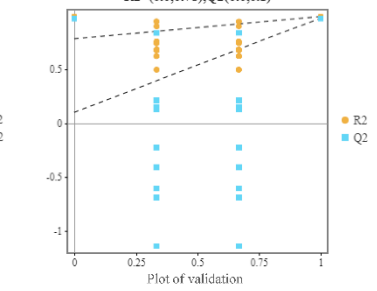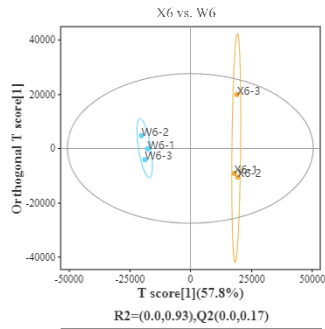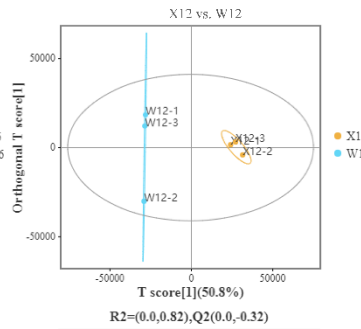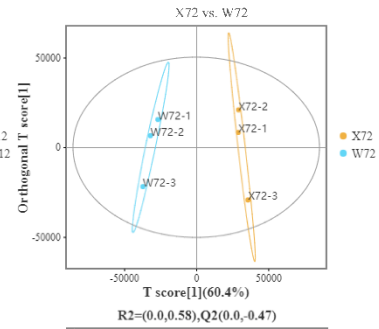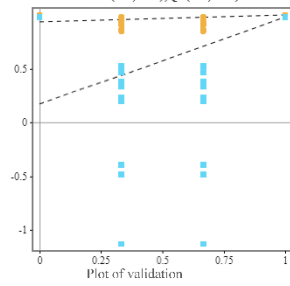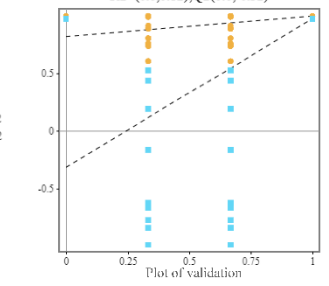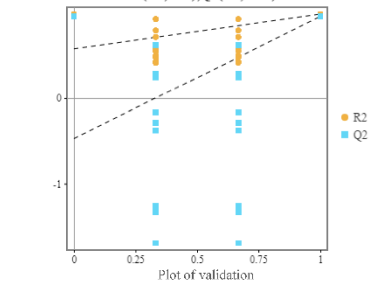

Supplement: s1 [file s1]
