# Supplementary material for: Comparative Metabolomic Studies of Siberian Wildrye (Elymus sibiricus L.): A New Look at the Mechanism of Plant Drought Resistance
Source: MDPI journal article supplement (doi:10.3390/ijms24010452), 2022-12-27
Supplement: s1 [file s1]

Table S6. Twenty-seven metabolites in response to drought in *E. sibiricus*.

| index        | Up/Down | Compounds                 | Class                            | Formula                                                      | Pathway                                                                                                                                                                                                                                                                                                                                                                                                                                                                                              |
|--------------|---------|---------------------------|----------------------------------|--------------------------------------------------------------|------------------------------------------------------------------------------------------------------------------------------------------------------------------------------------------------------------------------------------------------------------------------------------------------------------------------------------------------------------------------------------------------------------------------------------------------------------------------------------------------------|
| Com_1037_pos | Down    | Lysine                    | Amino Acid And Derivatives       | C <sub>6</sub> H <sub>14</sub> N <sub>2</sub> O <sub>2</sub> | -                                                                                                                                                                                                                                                                                                                                                                                                                                                                                                    |
| Com_1093_pos | Up      | L-Phenylalanine           | Amino Acid And Derivatives       | C <sub>9</sub> H <sub>11</sub> NO <sub>2</sub>               | ko01100//Metabolic pathways;ko01110//Biosynthesis of secondary metabolites;ko01230//Biosynthesis of amino acids;ko02010//ABC transporters;ko00970//Aminoacyl-tRNA biosynthesis;ko01210//2-Oxocarboxylic acid metabolism;ko00940//Phenylpropanoid biosynthesis;ko00400//Phenylalanine, tyrosine and tryptophan biosynthesis;ko00960//Tropane, piperidine and pyridine alkaloid biosynthesis;ko00460//Cyanoamino acid metabolism;ko00360//Phenylalanine metabolism;ko00966//Glucosinolate biosynthesis |
| Com_202_neg  | Up      | Citric acid               | Tca Cycle                        | C <sub>6</sub> H <sub>8</sub> O <sub>7</sub>                 | ko01100//Metabolic pathways;ko01110//Biosynthesis of secondary metabolites;ko01120//Microbial metabolism in diverse environments;ko01230//Biosynthesis of amino acids;ko01200//Carbon metabolism;ko01210//2-Oxocarboxylic acid metabolism;ko00630//Glyoxylate and dicarboxylate metabolism;ko00250//Alanine, aspartate and glutamate metabolism;ko00020//Citrate cycle (TCA cycle)                                                                                                                   |
| Com_327_neg  | Down    | 2,2-Dimethylsuccinic acid | Organic Acid And Its Derivatives | C <sub>6</sub> H <sub>10</sub> O <sub>4</sub>                | -                                                                                                                                                                                                                                                                                                                                                                                                                                                                                                    |

|             |      |                                 |                                |           |                                                                                                                                                                                                                                                                                                                                                                                                                                                  |
|-------------|------|---------------------------------|--------------------------------|-----------|--------------------------------------------------------------------------------------------------------------------------------------------------------------------------------------------------------------------------------------------------------------------------------------------------------------------------------------------------------------------------------------------------------------------------------------------------|
| Com_363_neg | Down | L-Glutamine                     | Amino Acid And Derivatives     | C5H10N2O3 | ko01100//Metabolic pathways;ko01120//Microbial metabolism in diverse environments;ko01230//Biosynthesis of amino acids;ko02010//ABC transporters;ko00230//Purine metabolism;ko00240//Pyrimidine metabolism;ko00970//Aminoacyl-tRNA biosynthesis;ko00630//Glyoxylate and dicarboxylate metabolism;ko00250//Alanine, aspartate and glutamate metabolism;ko00220//Arginine biosynthesis;ko00750//Vitamin B6 metabolism;ko00910//Nitrogen metabolism |
| Com_523_pos | Down | Ala-gly                         | Amino Acid And Derivatives     | C5H10N2O3 | -                                                                                                                                                                                                                                                                                                                                                                                                                                                |
| Com_552_pos | Up   | N-Methyl-a-aminoisobutyric acid | Amino Acid And Derivatives     | C5H11NO2  | -                                                                                                                                                                                                                                                                                                                                                                                                                                                |
| Com_572_pos | Up   | 7-methylguanine                 | Purines and purine derivatives | C6H7N5O   | -                                                                                                                                                                                                                                                                                                                                                                                                                                                |
| Com_580_pos | Down | Cycloleucine                    | Amino Acid And Derivatives     | C6H11NO2  | -                                                                                                                                                                                                                                                                                                                                                                                                                                                |
| Com_620_pos | Down | DL-Alanyl-glycine               | Amino Acid And Derivatives     | C5H10N2O3 | -                                                                                                                                                                                                                                                                                                                                                                                                                                                |
| Com_621_pos | Up   | DL-Indole-3-lactic acid         | Indoles and derivatives        | C11H11NO3 | -                                                                                                                                                                                                                                                                                                                                                                                                                                                |
| Com_624_pos | Up   | Proline                         | Amino Acid And Derivatives     | C5H9NO2   | -                                                                                                                                                                                                                                                                                                                                                                                                                                                |
| Com_625_pos | Up   | Valine                          | Amino Acid And Derivatives     | C5H11NO2  | -                                                                                                                                                                                                                                                                                                                                                                                                                                                |

|             |      |                           |                              |            |                                                                                                                                                                                                                                                                                                                                                                                                                                |
|-------------|------|---------------------------|------------------------------|------------|--------------------------------------------------------------------------------------------------------------------------------------------------------------------------------------------------------------------------------------------------------------------------------------------------------------------------------------------------------------------------------------------------------------------------------|
| Com_626_pos | Down | Glutamine                 | Amino Acid And Derivatives   | C5H10N2O3  | -<br><br>ko01100//Metabolic pathways;ko01110//Biosynthesis of secondary metabolites;ko01230//Biosynthesis of amino acids;ko00970//Aminoacyl-tRNA biosynthesis;ko01210//2-Oxocarboxylic acid metabolism;ko00260//Glycine, serine and threonine metabolism;ko00380//Tryptophan metabolism;ko00400//Phenylalanine, tyrosine and tryptophan biosynthesis;ko00966//Glucosinolate biosynthesis;ko00901//Indole alkaloid biosynthesis |
| Com_637_pos | Up   | L-Tryptophan              | Amino Acid And Derivatives   | C11H12N2O2 |                                                                                                                                                                                                                                                                                                                                                                                                                                |
| Com_670_pos | Down | DL-Citrulline             | Amino Acid And Derivatives   | C6H13N3O3  | -                                                                                                                                                                                                                                                                                                                                                                                                                              |
| Com_673_pos | Up   | D-Proline                 | Amino Acid And Derivatives   | C5H9NO2    | ko01100//Metabolic pathways;ko00330//Arginine and proline metabolism                                                                                                                                                                                                                                                                                                                                                           |
| Com_682_pos | Up   | HBOA                      | Organoheterocyclic compounds | C8H7NO3    | ko01110//Biosynthesis of secondary metabolites;ko00402//Benzoxazinoid biosynthesis                                                                                                                                                                                                                                                                                                                                             |
| Com_728_pos | Up   | isoleucine                | Amino Acid And Derivatives   | C6H13NO2   | -                                                                                                                                                                                                                                                                                                                                                                                                                              |
| Com_729_pos | Down | D-glutamine               | Amino Acid And Derivatives   | C5H10N2O3  | ko01100//Metabolic pathways                                                                                                                                                                                                                                                                                                                                                                                                    |
| Com_775_pos | Up   | D-Phenylalanine           | Amino Acid And Derivatives   | C9H11NO2   | ko01100//Metabolic pathways;ko00360//Phenylalanine metabolism                                                                                                                                                                                                                                                                                                                                                                  |
| Com_778_pos | Up   | DL-Norvaline              | Amino Acid And Derivatives   | C5H11NO2   | -                                                                                                                                                                                                                                                                                                                                                                                                                              |
| Com_863_pos | Up   | trans-3-Hydroxy-L-proline | Amino Acid And Derivatives   | C5H9NO3    | ko01100//Metabolic pathways;ko00330//Arginine and proline metabolism                                                                                                                                                                                                                                                                                                                                                           |

|             |      |                     |                                  |           |                                                                                                                                                                                                                                                                                                                                                                                                                                   |
|-------------|------|---------------------|----------------------------------|-----------|-----------------------------------------------------------------------------------------------------------------------------------------------------------------------------------------------------------------------------------------------------------------------------------------------------------------------------------------------------------------------------------------------------------------------------------|
| Com_888_pos | Up   | 6-Aminocaproic acid | Fatty Acyls                      | C6H13NO2  | ko01100//Metabolic pathways;ko01120//Microbial metabolism in diverse environments                                                                                                                                                                                                                                                                                                                                                 |
| Com_898_pos | Down | DL-Glutamine        | Amino Acid And Derivatives       | C5H10N2O3 | -                                                                                                                                                                                                                                                                                                                                                                                                                                 |
| Com_900_pos | Down | L-lysine            | Amino Acid And Derivatives       | C6H14N2O2 | ko01100//Metabolic pathways;ko01110//Biosynthesis of secondary metabolites;ko01120//Microbial metabolism in diverse environments;ko01230//Biosynthesis of amino acids;ko02010//ABC transporters;ko00970//Aminoacyl-tRNA biosynthesis;ko01210//2-Oxocarboxylic acid metabolism;ko00310//Lysine degradation;ko00960//Tropane, piperidine and pyridine alkaloid biosynthesis;ko00300//Lysine biosynthesis;ko00780//Biotin metabolism |
| Com_96_neg  | Up   | Isocitrate          | Organic Acid And Its Derivatives | C6H8O7    | ko01100//Metabolic pathways;ko01110//Biosynthesis of secondary metabolites;ko01120//Microbial metabolism in diverse environments;ko01230//Biosynthesis of amino acids;ko01200//Carbon metabolism;ko01210//2-Oxocarboxylic acid metabolism;ko00630//Glyoxylate and dicarboxylate metabolism;ko00020//Citrate cycle (TCA cycle)                                                                                                     |

---
