# Supplementary material for: Comparative Metabolomic Studies of Siberian Wildrye (Elymus sibiricus L.): A New Look at the Mechanism of Plant Drought Resistance
Source: MDPI journal article supplement (doi:10.3390/ijms24010452), 2022-12-27
Supplement: s1 [file s1]

Table S1. Comprehensive evaluation and ranking of membership functions of 36 *Elymus sibiricus* phenotypic data.

| Sample ID | Membership<br>function values<br>of REC | Membership<br>function values<br>of PS | Membership<br>function values<br>of RWC | average | Order | Sample ID | Membership<br>function values<br>of REC | Membership<br>function values<br>of PS | Membership<br>function values<br>of RWC | Average | Order |
|-----------|-----------------------------------------|----------------------------------------|-----------------------------------------|---------|-------|-----------|-----------------------------------------|----------------------------------------|-----------------------------------------|---------|-------|
| GS002-17  | 0.16                                    | 0.27                                   | 0.47                                    | 0.30    | 32    | SC012-9   | 0.60                                    | 0.45                                   | 0.50                                    | 0.52    | 20    |
| GS003-28  | 0.61                                    | 0.49                                   | 0.78                                    | 0.62    | 10    | SC015-5   | 0.51                                    | 0.36                                   | 0.57                                    | 0.48    | 26    |
| GS008-39  | 0.34                                    | 0.79                                   | 0.95                                    | 0.69    | 6     | W10-34    | 0.52                                    | 0.29                                   | 0.61                                    | 0.48    | 27    |
| GS012-20  | 0.79                                    | 0.69                                   | 0.84                                    | 0.77    | 4     | W16-29    | 0.01                                    | 0.06                                   | 0.00                                    | 0.02    | 37    |
| HB001-1   | 0.46                                    | 0.39                                   | 0.69                                    | 0.51    | 22    | W20-4     | 0.36                                    | 0.38                                   | 0.49                                    | 0.41    | 29    |
| HB003-9   | 0.60                                    | 0.68                                   | 0.79                                    | 0.69    | 7     | W22-11    | 0.72                                    | 0.86                                   | 0.83                                    | 0.80    | 3     |
| HB006-22  | 0.30                                    | 0.21                                   | 0.26                                    | 0.26    | 33    | W26-29    | 0.16                                    | 0.61                                   | 0.35                                    | 0.37    | 30    |
| HB008-1   | 0.06                                    | 0.27                                   | 0.19                                    | 0.17    | 35    | XJ001-17  | 0.50                                    | 0.67                                   | 0.43                                    | 0.53    | 18    |
| NM004-1   | 0.53                                    | 0.53                                   | 0.52                                    | 0.53    | 19    | XJ003-26  | 0.75                                    | 0.40                                   | 0.64                                    | 0.60    | 13    |
| NM009-14  | 0.51                                    | 0.47                                   | 0.64                                    | 0.54    | 17    | XJ010-11  | 0.54                                    | 0.39                                   | 0.55                                    | 0.49    | 25    |
| NM012-25  | 0.38                                    | 0.09                                   | 0.58                                    | 0.35    | 31    | XJ013-28  | 0.76                                    | 0.25                                   | 0.63                                    | 0.55    | 16    |
| NM017-26  | 0.67                                    | 0.54                                   | 0.62                                    | 0.61    | 12    | XJ023-23  | 0.75                                    | 0.42                                   | 0.71                                    | 0.62    | 11    |
| NM030-17  | 0.46                                    | 0.64                                   | 0.57                                    | 0.56    | 15    | XJ029-26  | 0.90                                    | 0.91                                   | 0.83                                    | 0.88    | 2     |
| QH001-21  | 0.81                                    | 0.57                                   | 0.77                                    | 0.72    | 5     | XJ030-21  | 0.80                                    | 1.00                                   | 1.00                                    | 0.93    | 1     |
| QH003-19  | 0.64                                    | 0.26                                   | 0.60                                    | 0.50    | 24    | XZ003-12  | 0.37                                    | 0.00                                   | 0.24                                    | 0.20    | 34    |
| QH004-36  | 0.72                                    | 0.41                                   | 0.84                                    | 0.66    | 8     | XZ007-5   | 0.66                                    | 0.60                                   | 0.49                                    | 0.59    | 14    |
| SC006-4   | 0.77                                    | 0.26                                   | 0.52                                    | 0.52    | 21    | XZ012-16  | 0.57                                    | 0.21                                   | 0.59                                    | 0.45    | 28    |
| SC007-27  | 0.71                                    | 0.61                                   | 0.59                                    | 0.64    | 9     | XZ018-5   | 0.23                                    | 0.02                                   | 0.21                                    | 0.15    | 36    |
| SC011-4   | 0.74                                    | 0.17                                   | 0.60                                    | 0.50    | 23    |           |                                         |                                        |                                         |         |       |
