# Supplementary material for: Comparative Metabolomic Studies of Siberian Wildrye (Elymus sibiricus L.): A New Look at the Mechanism of Plant Drought Resistance
Source: Int J Mol Sci. 2022 Dec 27;24(1):452. doi: 10.3390/ijms24010452 (PMC9820681; doi:10.3390/ijms24010452)
Supplement: Supplementary file 1 [file ijms-24-00452-s001.zip]

Archive with 9 entries (9 files):
- ijms-2044401-supplementary figures.pdf
- Table S1.pdf
- Table S2.xlsx
- Table S3.xlsx
- Table S4.xlsx
- Table S5.xlsx
- Table S6.pdf
- Table S7.xlsx
- Table S8.xlsx
