# Supplementary material for: Comparative Metabolomic Studies of Siberian Wildrye (Elymus sibiricus L.): A New Look at the Mechanism of Plant Drought Resistance
Source: Int J Mol Sci. 2022 Dec 27;24(1):452. doi: 10.3390/ijms24010452 (PMC9820681; doi:10.3390/ijms24010452)
Supplement: Supplementary file 1 [file ijms-24-00452-s001.zip › Table S2.xlsx]

## Sheet: Sheet1
Table S2. Integral quantitative values of metabolites in each sample and QC samples.
index	Compounds	Class	Ion mode	Molecular Weight (Da)	Formula	RT	M_X0-1	M_X0-2	M_X0-3	M_X6-1	M_X6-2	M_X6-3	M_X12-1	M_X12-2	M_X12-3	M_X72-1	M_X72-2	M_X72-3	M_X120-1	M_X120-2	M_X120-3	M_W0-1	M_W0-2	M_W0-3	M_W6-1	M_W6-2	M_W6-3	M_W12-1	M_W12-2	M_W12-3	M_W72-1	M_W72-2	M_W72-3	M_W120-1	M_W120-2	M_W120-3	QC1	QC2	QC3	QC4	CAS	HMDB	C_ID	Pathway	KEGG_B_class	KEGG_A_class
Com_1_neg	D-(+)-Cellobiose	Carbohydrates And Its Derivatives	NEG	342.3	C12H22O11	0.91	235100	283800	213700	367100	343100	418100	284300	390200	315800	194400	153200	268100	419700	250900	220900	150400	158100	127500	476800	266800	272800	284300	517300	421900	171400	271900	267800	293600	373500	306500	280100	272600	305400	303900	528-50-7	HMDB0000055	-	-	-	-
Com_2_neg	Naringenin chalcone	Chalcones and dihydrochalcones	NEG	272.253	C15H12O5	8.518	12120	12790	15650	5512	9681	10650	11190	9974	8949	5976	5290	11570	6601	7091	12150	32490	25930	27730	17860	18500	16920	20240	26070	20910	11740	18240	17090	8245	11160	9864	11720	12940	12800	14330	5071-40-9	HMDB0029631	C06561	ko01100//Metabolic pathways;ko01110//Biosynthesis of secondary metabolites;ko00941//Flavonoid biosynthesis	Biosynthesis of other secondary metabolites;Global and overview maps	Metabolism
Com_3_neg	Echinatin	Chalcones and dihydrochalcones	NEG	270.28	C16H14O4	8.645	7662	6136	3060	3519	3790	3373	3488	3295	3915	2701	2842	4976	5529	3605	3236	5903	5092	6447	4834	5018	2871	2857	3981	3194	2657	4376	3526	4071	4358	3518	2862	2138	3529	5065	--	--	-	-	-	-
Com_4_neg	Choline bitartrate	Amines	NEG	253.25	C9H19NO7	0.97	272100	223600	171500	312500	291300	230700	199000	303700	193600	202500	191400	222500	219100	292300	257200	161800	163500	96880	179200	180900	161400	192900	189900	154100	245200	278500	331000	204200	222100	232100	254400	187600	194600	217700	-	HMDB0250194	C00919	ko02010//ABC transporters	Membrane transport	Environmental Information Processing
Com_5_neg	L-Histidine	Amino Acid And Derivatives	NEG	155.15	C6H9N3O2	0.76	355100	487800	421000	2013000	2046000	2084000	2086000	2072000	1989000	4125000	3292000	4615000	6547000	5512000	5363000	313400	317600	301800	1033000	1208000	1175000	1794000	2249000	1703000	5027000	6065000	7057000	4670000	4972000	4776000	2813000	2427000	2957000	3002000	71-00-1	HMDB0000177	C00135	ko01100//Metabolic pathways;ko01110//Biosynthesis of secondary metabolites;ko01230//Biosynthesis of amino acids;ko02010//ABC transporters;ko00970//Aminoacyl-tRNA biosynthesis;ko00340//Histidine metabolism;ko00410//beta-Alanine metabolism	Amino acid metabolism;Global and overview maps;Membrane transport;Metabolism of other amino acids;Translation	Environmental Information Processing;Genetic Information Processing;Metabolism
Com_6_neg	O-Acetylserine	Amino Acid And Derivatives	NEG	147.13	C5H9NO4	1.056	23540	40370	28990	44220	34270	43210	27940	28990	24420	45740	32540	51020	57460	57450	86160	137100	68480	70210	33240	27780	28250	26980	41410	25160	56850	61100	60140	64910	49590	57160	35740	28230	47810	46820	5147-00-2	HMDB0003011	C00979	ko01100//Metabolic pathways;ko01110//Biosynthesis of secondary metabolites;ko01120//Microbial metabolism in diverse environments;ko01230//Biosynthesis of amino acids;ko01200//Carbon metabolism;ko00270//Cysteine and methionine metabolism;ko00908//Zeatin biosynthesis;ko04122//Sulfur relay system;ko00920//Sulfur metabolism	Amino acid metabolism;Energy metabolism;Folding, sorting and degradation;Global and overview maps;Metabolism of terpenoids and polyketides	Genetic Information Processing;Metabolism
Com_7_neg	L-Gulono-1,4-lactone	Sugar Acids And Its Derivatives	NEG	178.14	C6H10O6	0.948	142800	121700	87680	143100	132000	142000	92080	133400	89150	155600	102900	205600	274300	262500	297200	132800	140100	140500	130500	149000	123800	146100	244200	148900	230200	238600	291500	190600	160600	233600	157500	192500	150600	169000	1128-23-0	HMDB0003466	C01040	ko01100//Metabolic pathways;ko00053//Ascorbate and aldarate metabolism	Carbohydrate metabolism;Global and overview maps	Metabolism
Com_8_neg	Fraxin	Phenylpropanoids	NEG	370.313	C16H18O10	5.68	6330	4326	5630	6856	4458	11230	7578	5951	3977	5738	7920	9872	3810	6525	5407	6865	6567	4489	16580	12360	12930	13690	17180	14170	15460	13030	21260	12340	10040	10610	8000	8724	6451	5582	-	HMDB0252486	-	-	-	-
Com_9_neg	Isoschaftoside	Flavones and Flavonols	NEG	564.499	C26H28O14	6.03	25330000	31460000	26650000	19000000	19950000	25800000	19910000	23030000	24100000	28410000	25780000	41260000	57350000	39970000	46500000	65650000	65040000	50930000	40870000	45470000	37980000	47870000	68810000	50290000	59740000	61120000	76440000	29930000	29160000	31660000	41580000	36760000	41190000	37760000	--	--	-	-	-	-
Com_10_neg	Trehalose 6-phosphate	Carbohydrates And Its Derivatives	NEG	422.276	C12H23O14P	0.96	325400	407400	229000	555400	305500	347400	259700	265600	278600	259200	216400	259600	667900	464200	457000	270300	267800	251300	368500	476700	349500	287400	584800	371800	330400	418600	443800	405000	551400	528200	368400	379000	398400	400900	4484-88-2	HMDB0001124	C00689	ko01100//Metabolic pathways;ko01110//Biosynthesis of secondary metabolites;ko00500//Starch and sucrose metabolism	Carbohydrate metabolism;Global and overview maps	Metabolism
Com_11_neg	9(S)-HOTrE	Fatty Acyls	NEG	294.429	C18H30O3	12.07	117300	191100	138000	120200	112500	118500	75410	88930	96010	77270	70120	124500	148800	83280	169900	105100	126200	94580	270000	315700	286500	168500	356500	192300	187900	166800	155100	108100	104100	113800	131400	138700	116400	136700	-	HMDB0247705	C16326	ko00592//alpha-Linolenic acid metabolism	Lipid metabolism	Metabolism
Com_12_neg	6-Sialyllactose	Carbohydrates And Its Derivatives	NEG	633.551	C23H39NO19	0.73	3439	21040	6876	12250	7657	8403	4219	9190	6132	9218	6913	14190	30410	8424	30990	2679	2677	2299	7290	5368	6502	6892	17700	10380	4960	8091	5737	15340	27960	17000	7273	9572	5766	4224	--	--	-	-	-	-
Com_13_neg	Sinapyl Alcohol	Phenols And Its Derivatives	NEG	210.226	C11H14O4	5.92	13200	12990	12580	14280	15910	27770	13280	12730	13090	15290	13150	20570	24590	12760	12050	4185	7601	6912	5152	7171	8592	15310	14380	7788	14860	12780	13810	18410	15470	22610	13200	12420	14000	11770	537-33-7	HMDB0013070	C02325	ko01100//Metabolic pathways;ko01110//Biosynthesis of secondary metabolites;ko00940//Phenylpropanoid biosynthesis	Biosynthesis of other secondary metabolites;Global and overview maps	Metabolism
Com_14_neg	alpha-Benzylsuccinic acid	Organic Acid And Its Derivatives	NEG	208.211	C11H12O4	0.71	411900	333200	476200	301100	279400	291900	214100	184800	252400	513500	273700	362400	551900	411500	522400	198500	144700	161700	182300	132400	211600	198200	237100	200100	182200	206000	260600	246300	389100	287800	265300	227100	224000	357300	--	--	-	-	-	-
Com_15_neg	UDP-D-xylose	Nucleotide And Its Derivates	NEG	536.044	C14H22N2O16P2	0.9	83050	122200	48320	145600	116900	98500	130300	144500	83700	148400	135300	205700	389800	191100	187600	293400	243300	212500	249500	264700	224600	303400	364100	298100	255200	303200	310500	130000	210300	206500	179600	205900	173800	168700	3616-06-06	HMDB0001018	C00190	ko01100//Metabolic pathways;ko00520//Amino sugar and nucleotide sugar metabolism;ko00908//Zeatin biosynthesis	Carbohydrate metabolism;Global and overview maps;Metabolism of terpenoids and polyketides	Metabolism
Com_16_neg	4-O-p-Coumaroylquinic acid	Phenolic acids	NEG	338.1	C16H18O8	5.93	5396000	7441000	5919000	2595000	2910000	3772000	3270000	3681000	3668000	3470000	3177000	4493000	2954000	1975000	2081000	397000	399700	336000	186200	246500	227900	261100	443300	367500	262600	332100	360500	184100	191900	219000	2046000	1957000	1944000	2010000	-	HMDB0302093	-	-	-	-
Com_17_neg	(9Z,11E)-Octadecadienoic acid	Fatty Acyls	NEG	280.24	C18H32O2	4.33	41400	53280	31860	56790	57370	59350	34460	47860	33630	44780	29970	56680	86140	61500	72300	33970	31460	36330	41650	55270	52520	38120	65740	48990	50880	53420	60700	55590	67570	60140	48320	47230	49480	48220	2540-56-9	HMDB0003797	C04056	ko00591//Linoleic acid metabolism	Lipid metabolism	Metabolism
Com_18_neg	1-O-Gentisoyl-D-glucoside	Phenolic acids	NEG	316.079	C13H16O9	4.56	1343000	2089000	1497000	2226000	2746000	2284000	1264000	1482000	1188000	1262000	1177000	1959000	2686000	2590000	2422000	1735000	1703000	1402000	2192000	2562000	2398000	2899000	4526000	3503000	2982000	3253000	3635000	4018000	4342000	4867000	2316000	2393000	2410000	2261000	--	--	-	-	-	-
Com_19_neg	Lirioresinol A	Lignans	NEG	418.162	C22H26O8	6.96	54000	31200	40580	16060	36630	19600	12180	19350	12650	23110	20890	42760	33960	23160	36920	14040	28380	14680	9204	21588	12110	18580	18980	15260	27100	23940	28430	15990	23450	25957	26820	31690	12370	11550	21453-71-4	HMDB0038928	-	-	-	-
Com_20_neg	9,10,13-Trihydroxyoctadec-11-enoic acid	Fatty Acyls	NEG	330.241	C18H34O5	9.12	1599000	2266000	1597000	1590000	1636000	1815000	1431000	1510000	1457000	1004000	889600	1548000	1597000	1108000	1306000	1107000	1206000	993500	1362000	1604000	1664000	1490000	2876000	2090000	848200	899200	1029000	861800	974700	1087000	1332000	1379000	1288000	1345000	29907-57-1	HMDB0004710	C14835	ko00591//Linoleic acid metabolism	Lipid metabolism	Metabolism
Com_21_neg	D-Arabinono-1,4-lactone	Carbohydrates And Its Derivatives	NEG	148.037	C5H8O5	1.48	17020	32410	20260	46100	39550	59780	96750	88530	59570	85800	87530	88110	234800	169800	203500	24460	23720	26400	37980	47890	58630	74180	199600	135800	119800	157700	174200	177100	210300	233500	63090	125500	73040	102300	-	HMDB0302833	C00652	ko01100//Metabolic pathways;ko00053//Ascorbate and aldarate metabolism	Carbohydrate metabolism;Global and overview maps	Metabolism
Com_22_neg	dATP	Nucleotide And Its Derivates	NEG	491.001	C10H16N5O12P3	0.73	3831	9624	7284	10350	7286	13990	4610	8889	4610	12320	4650	14220	21920	11900	20480	4316	6517	6513	4605	6557	4600	5204	16620	12950	5727	5767	8417	6172	14660	23460	7692	8850	8888	9624	1927-31-7	HMDB0001532	C00131	ko01100//Metabolic pathways;ko00230//Purine metabolism	Global and overview maps;Nucleotide metabolism	Metabolism
Com_23_neg	2-deoxyglucose-6-phosphate	Nucleotide And Its Derivates	NEG	244.136	C6H13O8P	0.98	1042000	1218000	627900	59730	90090	61730	219600	86880	156500	200200	123600	149900	282600	491700	227300	2108000	1470000	1227000	241100	151100	210500	347700	258200	163000	201500	293200	367300	568700	309200	307400	724500	833200	794800	887000	--	--	-	-	-	-
Com_24_neg	3-(2-Naphthyl)-D-Alanine	Amino Acid And Derivatives	NEG	215.248	C13H13NO2	6.22	26130	36700	28270	26260	24670	15620	23140	21840	15400	21990	13200	19350	15570	22020	30450	16320	16060	20910	16530	18880	28510	16450	22880	16490	26370	34620	25790	34810	35890	25190	28930	20610	22560	20760	--	--	-	-	-	-
Com_25_neg	Luteolin-7-O-beta-D-glucuronide	Flavonoids	NEG	462.366	C21H18O12	6.53	6066	13550	6757	17290	13860	19340	21790	11110	23420	4062	5914	2500	20680	7398	9725	64540	59490	26300	203600	334900	203000	52250	87920	108900	151700	128800	245900	164400	164600	190100	84840	76640	81010	66860	--	--	-	-	-	-
Com_26_neg	N-Acetylglucosamine 1-phosphate	Carbohydrates And Its Derivatives	NEG	301.1	C8H16NO9P	0.91	128500	203100	120600	189300	170600	231700	175300	202900	181700	268300	132800	203300	306200	176600	196600	123300	74750	104000	156700	159400	171100	159300	304800	180400	117500	163400	178300	132200	197400	205400	181100	174400	160900	128400	--	--	-	-	-	-
Com_27_neg	5-Phosphoribosyl 1-pyrophosphate	Pentose phosphates	NEG	196.25	C5H13O14P3	1.01	23180	19340	23210	22800	15410	17720	16700	24050	17960	38480	41670	59720	54950	42290	22410	30570	44620	41260	21610	24570	32650	32530	35520	26900	47970	65350	96600	65760	50670	73930	36790	28150	38940	32080	-	HMDB0062643	C00119	ko01100//Metabolic pathways;ko01110//Biosynthesis of secondary metabolites;ko01120//Microbial metabolism in diverse environments;ko01230//Biosynthesis of amino acids;ko01200//Carbon metabolism;ko00230//Purine metabolism;ko00240//Pyrimidine metabolism;ko00030//Pentose phosphate pathway;ko00400//Phenylalanine, tyrosine and tryptophan biosynthesis;ko00340//Histidine metabolism;ko00790//Folate biosyn…	Amino acid metabolism;Carbohydrate metabolism;Global and overview maps;Metabolism of cofactors and vitamins;Nucleotide metabolism	Metabolism
Com_28_neg	ADP-ribose	Nucleotide And Its Derivates	NEG	591.315	C15H23N5O14P2	1.05	7714	5554	18760	7621	4212	10070	6701	7455	6397	4205	4213	6741	29690	12860	36400	4977	7536	4644	5922	9158	5997	3112	4300	9520	9704	11760	18720	16100	26130	18200	15630	8059	7117	6104	20762-30-5	HMDB0001178	C00301	ko01100//Metabolic pathways;ko00230//Purine metabolism	Global and overview maps;Nucleotide metabolism	Metabolism
Com_29_neg	Sibirioside A	Cinnamic acids and derivatives	NEG	472.446	C21H28O12	6.46	15730	17490	14210	6529	19970	14900	10150	13110	12170	13390	13640	37720	20090	20070	20380	34490	35490	22490	23690	42340	27260	21800	41360	25620	56870	40530	55460	14530	12460	8942	27790	23180	22590	15590	--	--	-	-	-	-
Com_30_neg	1,5-Dicaffeoylquinic acid	Alcohols and polyols	NEG	516.458	C25H24O12	6.89	77760	57210	50030	74810	99340	109100	38990	76750	53660	68690	34800	76810	141400	128700	146200	131100	153700	121200	184400	174400	156300	132700	164400	129300	233900	261400	301800	103900	143200	120200	122700	130300	117800	97930	-	HMDB0242355	-	-	-	-
Com_31_neg	Hydroxycitric acid	Organic Acid And Its Derivatives	NEG	208.124	C6H8O8	0.9	94280	87360	70820	145500	119800	142800	168600	147900	162300	205900	191100	222400	416900	363700	431400	100600	106400	77490	155800	155800	176200	272800	450400	322800	155200	139600	178600	337900	457400	433600	202600	217700	216500	188700	27750-10-3	HMDB0031159	-	-	-	-
Com_32_neg	Phenprobamate	Amino Acid And Derivatives	NEG	179.216	C10H13NO2	4.09	9185	12610	10150	50260	53130	60170	107800	124900	108500	156000	115400	168600	307300	250600	302400	9369	11560	10120	49240	55640	49360	157300	209200	156800	280900	319100	374600	258000	287300	283300	152700	152000	148000	150800	-	HMDB0256418	-	-	-	-
Com_33_neg	p-Coumaric acid 4-O-hexoside	Cinnamic acids and derivatives	NEG	326.303	C15H18O8	5.54	580000	731500	635400	527600	581300	624500	504500	585600	512000	552800	461300	850100	755600	550100	469400	373600	394300	377300	324300	400300	288300	367000	567400	404500	507000	512500	688700	296400	331700	407600	518800	527400	494000	497800	--	--	-	-	-	-
Com_34_neg	Ophiopogonanone C	Flavonoids	NEG	356.332	C19H16O7	5.38	1243000	1472000	1190000	541200	592200	924000	671300	785500	729000	772700	620400	925800	750200	530700	499700	990900	1087000	753400	327200	421700	365900	456500	736900	497800	434300	466800	642000	164100	193100	188100	622100	678200	600400	598200	--	--	-	-	-	-
Com_35_neg	Isorhamnetin O-acetyl-hexoside	Flavonoids	NEG	520.1	C24H24O13	7.23	109500	161100	93800	223500	158400	216700	156100	198700	147800	607000	517800	784100	636300	510100	445100	129819	120782	111275	39310	16130	36430	24330	59090	86790	2813	170433	195897	67900	89510	103700	180300	176000	152400	149900	--	--	-	-	-	-
Com_36_neg	Palmitaldehyde	Fatty Acyls	NEG	240.425	C16H32O	10.22	174000	162800	171200	128500	144000	117900	139700	150100	164200	154900	163200	141700	140300	172600	153600	188500	170800	169700	165200	131500	192500	152000	124200	144400	154000	135000	123700	159100	141500	128600	339500	381100	347800	346400	629-80-1	HMDB0001551	C00517	ko00071//Fatty acid degradation	Lipid metabolism	Metabolism
Com_37_neg	Chrysoeriol 8-C-pentosyl-O-rutinoside	Flavonoids	NEG	740.2	C33H40O19	6.18	11350	18860	13540	4505	12100	9502	18250	9849	13940	7489	9370	18390	6899000	12030000	11150000	40000000	40480000	34770000	32000000	44310000	37140000	36450000	59530000	43060000	55640000	58790000	68440000	22760000	24620000	25420000	21640000	19330000	23700000	26590000	--	--	-	-	-	-
Com_38_neg	Chrysoeriol C-pentosyl-O-hexosyl-O-hexoside	Flavonoids	NEG	756.1	C33H40O20	5.97	68940	84246	57566	49255	47881	45197	52113	56536	56061	55712	59517	58713	12850	32410	13260	109800	106300	105700	87150	103400	88470	81560	148900	107500	132400	126700	225200	50540	61290	76380	50600	33430	46500	58590	--	--	-	-	-	-
Com_39_neg	Apigenin O-hexosyl-O-pentoside	Flavonoids	NEG	564.1	C26H28O14	6.83	31650	42900	36700	11960	12290	22890	22350	22520	23070	25310	16890	27140	24497	18582	16545	27360	29030	29260	14340	15160	21300	27190	61100	39470	18470	21560	25580	10670	7531	10980	16520	21810	19670	17610	--	--	-	-	-	-
Com_40_neg	Cyanidin O-acetylhexoside	Anthocyanins	NEG	490.1	C23H22O12	7.12	85040	114300	94260	111500	96920	91940	81190	92440	84560	142500	82900	160600	159600	155100	204700	268100	214100	198600	940600	1299000	962200	483700	707800	814800	1452000	1219000	1573000	1096000	1207000	1065000	485100	487500	461600	380900	--	--	-	-	-	-
Com_41_neg	Chrysoeriol 6-C-pentosyl-O-rutinoside	Flavonoids	NEG	741.1	C33H40O19	6.08	1286507	2297	1091386	1289710	1387420	2242	1863	1228260	1103680	1276870	1176060	3006	695500	1261000	1089000	5602000	5777000	3878000	3830000	5506000	3601000	4210000	7143000	4481000	7823000	6310000	10470000	2685000	3035000	3020000	2672000	2251000	2305000	2741000	--	--	-	-	-	-
Com_42_neg	Pelargonidin O-acetylhexoside	Anthocyanins	NEG	474.1	C23H22O11	7.39	26450	28690	19690	18240	11320	14560	12780	16470	10250	19060	18610	28590	28110	18460	19760	30290	29260	28310	17910	27410	20140	23810	40460	34390	33810	35790	52210	24540	23680	24710	31270	21180	27090	17100	--	--	-	-	-	-
Com_43_neg	Allantoin	Organoheterocyclic compounds	NEG	158.115	C4H6N4O3	0.94	217100	188600	207300	264300	265400	262300	215600	233100	173600	305900	253700	286200	287900	218000	205600	165700	162000	172300	197500	190100	171300	151300	143300	144700	225700	224900	213500	253100	209600	236300	197700	198000	224800	226000	97-59-6	HMDB0000462	-	-	-	-
Com_44_neg	2,3-Dimethylsuccinic acid	Amino Acid And Derivatives	NEG	144.042	C6H8O4	4.53	934700	878500	795500	655800	642300	611700	446900	532500	432400	756000	711400	918600	996700	909500	936600	466800	482500	457100	310100	346700	390900	436900	412500	420800	418700	393600	496400	936500	834400	873900	563800	577100	562600	633000	-	HMDB0245405	-	-	-	-
Com_45_neg	Sucralose	Carbohydrates And Its Derivatives	NEG	397.634	C12H19Cl3O8	1.1	35990	43390	47570	19510	33610	16630	38100	34710	20120	35010	13380	26190	24260	15220	22900	72900	64890	60350	39990	36040	32610	44250	36650	30370	12820	21080	16070	10820	12440	17540	21260	18790	21660	16380	56038-13-2	HMDB0031554	-	-	-	-
Com_46_neg	Sinapic acid-O-glucoside	Phenols And Its Derivatives	NEG	386.356	C17H22O10	5.9	600200	690400	437700	599700	708900	809300	458400	509600	450400	342700	309000	612600	659500	520500	524300	105100	121700	118500	207800	214100	190400	223200	323700	201300	280500	292500	312100	166100	193400	200600	402900	402300	394300	342100	--	--	-	-	-	-
Com_47_neg	Polyphyllin Vii	Saponin	NEG	1049.2	C51H84O22	1	3268	6729	3375	6739	7597	6550	14300	8300	10870	2489	3302	10490	6954	6374	6258	8685	6090	14260	2536	3367	6785	8254	25530	18000	7272	5840	2872	4169	5555	3011	3036	5049	5881	5472	--	--	-	-	-	-
Com_48_neg	Ajugol	Terpenoids	NEG	348.346	C15H24O9	0.93	17190	15370	9636	11720	7387	13490	6652	18700	22570	23810	17950	21520	22860	13870	11510	14770	11810	14020	11230	12530	10270	10090	16250	12350	12540	17590	23500	12130	22540	21830	16770	17610	17090	14470	-	HMDB0248074	-	-	-	-
Com_49_neg	Lawsone	Benzene and substituted derivatives	NEG	174.15	C10H6O3	7.96	24040	19630	23300	26170	35900	28210	21190	19910	11450	28890	28810	27010	14740	35630	15410	25430	28790	13100	34050	30490	15310	21010	22880	16160	29430	19960	23090	17420	26820	30220	40440	24890	13750	32700	-	HMDB0253997	-	-	-	-
Com_50_neg	Methyl 4-hydroxycinnamate	Phenylpropanoids	NEG	178.18	C10H10O3	8.76	11440	18840	14420	7286	7758	5038	11660	15090	10970	9269	14030	13020	1028000	183900	38300	6923	9173	8091	8079	6532	3333	4523	11010	9676	4117	8264	10330	4586	10310	86000	35080	27790	30210	27210	-	HMDB0302074	-	-	-	-
Com_51_neg	Methyl protocatechuate	Benzoic acids and derivatives	NEG	168.15	C8H8O4	6.97	37410	38080	46070	59060	52110	55230	51510	39130	76840	45690	42340	47090	53240	57760	72210	27140	26090	13490	72610	100300	79880	45830	42190	66920	26680	23880	34430	87180	91680	94720	52840	47300	51030	60000	--	--	-	-	-	-
Com_52_neg	Ureidoisobutyric acid	Organic Acid And Its Derivatives	NEG	146.069	C5H10N2O3	0.86	108000	68780	73790	7654	4996	8437	9231	11930	7819	4794	4409	6403	13090	12210	20060	151300	163600	163400	8047	8848	9454	12590	11540	13220	8446	13530	22790	19260	14100	18500	32490	32180	34940	29620	19140-82-0	HMDB0002031	-	-	-	-
Com_53_neg	Adenylosuccinic acid	Organic Acid And Its Derivatives	NEG	463.293	C14H18N5O11P	0.91	9811	7729	9183	8994	4713	3109	5336	10180	5592	8548	3680	5979	11410	9628	4559	15810	5820	5166	4958	2024	6266	5152	4419	4763	7073	7356	5259	4648	2402	5229	2804	8181	6239	4853	-	HMDB0248010	C03794	ko01100//Metabolic pathways;ko00230//Purine metabolism;ko00250//Alanine, aspartate and glutamate metabolism	Amino acid metabolism;Global and overview maps;Nucleotide metabolism	Metabolism
Com_54_neg	N-Acetyl-Dl-serine	Amino Acid And Derivatives	NEG	147.129	C5H9NO4	1.03	79380	122200	66880	71330	68690	68880	59290	84550	69170	85070	67760	75370	105700	103500	134700	168800	151100	140500	64210	58000	76460	58960	59630	52990	102600	96970	154400	118100	102800	92920	101000	94680	104300	75060	--	--	-	-	-	-
Com_55_neg	Isorhamnetin-3-O-neohespeidoside	Flavonoids	NEG	624.552	C28H32O16	6.79	129600	150800	101600	324100	340500	383800	193500	228600	186200	177400	171800	318900	299100	234900	234100	13000	8264	10190	118200	130100	241300	146600	313600	464200	24860	19140	21140	386400	747900	778600	211500	218000	249700	182900	--	--	-	-	-	-
Com_56_neg	LysoPE 16:0 (2n isomer)	Phospholipid	NEG	453.3	C21H44NO7P	12.5	328100	101500	484700	543700	461200	515200	521600	596400	349100	476300	672800	830700	60150	202000	4682	339000	273300	392000	382200	590100	361800	372900	45590	37000	643600	669500	1117000	383900	223900	282200	220400	213800	209300	218300	--	--	-	-	-	-
Com_57_neg	Purpureaside C	Phenylpropanoids	NEG	786.737	C35H46O20	5.91	202300	287000	161900	332700	315400	362700	144100	228000	139300	89010	73610	171700	144100	96270	62270	11950	15550	15280	126900	142700	200800	129200	245300	168500	9998	9534	15780	110300	130900	120500	111600	142000	131100	118700	--	--	-	-	-	-
Com_58_neg	Neohesperidin	Flavanones	NEG	610.56	C28H34O15	7.2	20290	19220	17890	26800	19590	25380	11060	16170	21700	15640	15490	25910	68580	107800	82400	545800	622400	435200	320000	397600	358700	255000	424100	314100	483900	460100	504900	489300	482400	468900	230800	236900	222700	222800	13241-33-3	HMDB0030748	C09806	ko00941//Flavonoid biosynthesis	Biosynthesis of other secondary metabolites	Metabolism
Com_59_neg	Salicin	Carbohydrates And Its Derivatives	NEG	286.28	C13H18O7	4.989	3622	3779	2521	3899	4622	6738	2804	6815	3750	3298	3042	4490	5571	7634	9105	5116	2846	3808	5847	7502	6347	4613	2889	5696	11160	11750	12870	7762	8647	10640	7809	4994	6953	5582	138-52-3	HMDB0003546	C01451	ko00010//Glycolysis / Gluconeogenesis	Carbohydrate metabolism	Metabolism
Com_60_neg	Shikimic Acid	Alcohols and polyols	NEG	174.15	C7H10O5	1.038	716200	1180000	1041000	938300	962300	1768000	1598000	1636000	1686000	2289000	1770000	2243000	1338000	902400	1089000	535900	544700	574700	1022000	1034000	846600	1382000	1546000	1151000	986700	1101000	1009000	829800	722300	905200	1152000	1071000	1202000	1164000	138-59-0	HMDB0003070	C00493	ko01100//Metabolic pathways;ko01110//Biosynthesis of secondary metabolites;ko01230//Biosynthesis of amino acids;ko00400//Phenylalanine, tyrosine and tryptophan biosynthesis	Amino acid metabolism;Global and overview maps	Metabolism
Com_61_neg	Morin Hydrate	Flavones and Flavonols	NEG	320.25	C15H12O8	7.68	8944	3398	3371	4705	2796	4402	4024	3017	4081	3817	4055	5689	5183	5109	5709	5877	5699	4415	5207	5816	4244	5108	7063	4558	5313	5597	4873	4802	5400	9702	4862	3499	4985	3104	480-16-0	HMDB0030796	-	-	-	-
Com_62_neg	Myricitrin	Flavones and Flavonols	NEG	464.38	C21H20O12	6.547	726500	850100	591800	404700	364600	344000	290000	364500	353800	385300	406300	561600	350400	176400	178200	10160	82587	75214	21750	20130	31700	17320	33140	25410	65315	8527	15580	44200	49930	76690	229200	219900	209400	208700	17912-87-7	HMDB0034360	-	-	-	-
Com_63_neg	Naringin	Flavanones	NEG	580.53	C27H32O14	6.979	46490	40850	38690	42780	33780	40620	25780	37080	31320	52430	39280	66200	105500	159800	142200	613300	576600	557300	491700	467600	462700	384400	781800	489600	556200	718700	779100	317900	444600	445300	287800	277000	285000	258600	10236-47-2	HMDB0002927	C09789	ko00941//Flavonoid biosynthesis	Biosynthesis of other secondary metabolites	Metabolism
Com_64_neg	Glucosylvitexin	Flavonoids	NEG	594.526	C27H30O15	6.25	234400	319100	229200	201700	212000	263400	157300	238300	203200	235700	184300	270300	4314000	2766000	3507000	307900	263800	257100	115300	176400	128500	152600	303000	220300	229900	234700	297900	245400	166200	189000	558300	523600	510300	522900	--	--	-	-	-	-
Com_65_neg	Maltopentaose	Carbohydrates And Its Derivatives	NEG	828.726	C30H52O26	0.99	4627	3953	2520	6296	2503	3345	4616	4205	2094	2820	2523	2101	3346	2098	2478	4892	7128	5495	3745	3233	2918	7956	15730	17190	5952	2089	2511	7098	7889	5460	4601	7559	3356	5001	34620-76-3	HMDB0012254	-	-	-	-
Com_66_neg	Loganic acid	Terpenoids	NEG	376.36	C16H24O10	4.79	25090	41300	30460	18400	21130	44810	22970	19000	25680	19960	15570	25180	35500	26450	34020	42690	43860	45030	39330	47490	55010	36670	53220	33390	44790	54300	51400	19510	20520	31430	29630	33180	34190	37290	-	HMDB0304409	C01512	ko01110//Biosynthesis of secondary metabolites;ko00902//Monoterpenoid biosynthesis	Global and overview maps;Metabolism of terpenoids and polyketides	Metabolism
Com_67_neg	1-Caffeoylquinic acid	Phenolic acids	NEG	354.095	C16H18O9	5.46	204200000	229300000	194700000	107800000	121700000	163000000	130600000	151100000	140300000	140200000	124200000	163300000	136100000	101300000	104400000	159400000	161500000	132100000	67210000	89550000	74320000	83230000	116300000	92600000	88120000	93860000	115400000	39900000	43430000	44340000	118300000	117200000	121000000	115500000	-	HMDB0304633	-	-	-	-
Com_68_neg	Isochlorogenic acid B	Alcohols and polyols	NEG	516.451	C25H24O12	6.768	34860	44940	35110	33850	43680	43290	40730	46470	45070	51700	43070	53520	69950	35260	34650	15452	17270	15649	6787	9183	7938	4805	7899	8209	17730	9498	21760	8745	7945	13570	25390	15210	29170	27100	-	HMDB0253617	-	-	-	-
Com_69_neg	Narirutin	Flavanones	NEG	580.535	C27H32O14	6.837	49230	48090	35730	42070	47460	38870	27480	36480	47540	31970	40540	87560	136400	191100	183700	636800	625800	704400	510800	613400	555300	517100	882500	603700	811900	859600	939200	479900	463700	494000	338200	332200	339200	377800	14259-46-2	HMDB0033740	-	-	-	-
Com_70_neg	Isoscopoletin	Phenylpropanoids	NEG	192.168	C10H8O4	6.759	4948	17178	12590	13795	3712	6599	4340	5449	3377	7520	7817	12392	5853	18619	4028	4961	5307	16282	36650	45810	52190	25310	21150	34630	4566	5828	7481	73710	77930	100500	14090	16540	20800	15380	--	--	-	-	-	-
Com_71_neg	Maltotetraose	Carbohydrates And Its Derivatives	NEG	666.578	C24H42O21	0.996	60540	97190	49760	73940	66470	59530	115400	108100	114400	37000	24550	56600	82230	54400	52820	124100	108400	105000	37590	30390	46670	171100	278900	292200	21490	27270	36100	83460	101900	89110	73400	75890	81830	92990	34612-38-9	HMDB0001296	-	-	-	-
Com_72_neg	Calceolarioside B	Phenylpropanoids	NEG	478.446	C23H26O11	6.67	304900	399600	264400	203300	260800	361500	315500	377500	354300	418500	307900	564800	383300	312700	314800	405800	416200	398900	462600	521000	407300	445300	606600	434000	708200	811800	1107000	240100	314000	350100	397400	316600	396600	356700	--	--	-	-	-	-
Com_73_neg	Apigenin	Flavones and Flavonols	NEG	270.24	C15H10O5	8.7	43460	65930	60000	49880	33090	57470	65070	55250	51210	59590	55510	71430	57135	51085	35660	82410	108600	89440	53760	32430	39720	59980	99910	85620	43770	38260	44500	48044	74976	61131	54140	37360	65040	52060	520-36-5	HMDB0002124	C01477	ko01100//Metabolic pathways;ko01110//Biosynthesis of secondary metabolites;ko00944//Flavone and flavonol biosynthesis;ko00941//Flavonoid biosynthesis;ko00943//Isoflavonoid biosynthesis	Biosynthesis of other secondary metabolites;Global and overview maps	Metabolism
Com_74_neg	Apigenin 5-O-glucoside	Flavonoids	NEG	432.38	C21H20O10	6.68	2609000	2582000	1983000	1561000	1695000	1930000	1592000	1852000	1982000	2178000	1995000	3140000	2607000	1845000	1711000	3912000	4619000	3444000	1698000	2223000	2110000	2402000	3870000	2796000	2489000	2878000	3336000	903200	966200	1104000	2222000	2216000	1898000	2219000	--	--	-	-	-	-
Com_75_neg	Butin	Flavanones	NEG	272.069	C15H12O5	8.61	5914	8306	7401	4212	5010	7573	6749	9140	8869	10620	6386	5850	10780	3888	8841	21000	22520	12900	8184	14430	15970	9640	12030	15670	8088	9563	14930	7341	5468	9451	8471	11010	6670	5424	-	HMDB0249463	C09614	ko00941//Flavonoid biosynthesis	Biosynthesis of other secondary metabolites	Metabolism
Com_76_neg	Ptaquiloside	Terpenoids	NEG	398.45	C20H30O8	11.23	18480	13680	15340	16400	7587	16540	7769	4198	13080	43340	12020	34160	33100	19020	58050	9190	9641	5427	18540	20170	53910	24770	25630	18630	39670	30090	51450	27130	29160	26220	17580	23070	31490	15180	-	HMDB0242690	-	-	-	-
Com_77_neg	Riboflavin-5'-monophosphate	Phenols And Its Derivatives	NEG	456.344	C17H21N4O9P	0.91	194400	247600	147900	309200	271800	304600	178500	220500	173500	214300	122700	195900	247200	210000	269600	194200	171300	161600	215900	264100	263400	166400	235100	241200	157900	160600	207300	191900	201700	250800	254000	192200	202100	234900	--	--	-	-	-	-
Com_78_neg	Sakuranetin	Flavanones	NEG	286.279	C16H14O5	1.01	170700	132500	138200	164000	151600	184200	99090	152600	128800	134700	131100	162500	202000	198000	225600	102800	117500	91250	148000	113100	131700	121800	141200	110700	178700	186400	220100	224900	185700	259000	126700	173000	145100	172100	2957-21-3	HMDB0030090	C09833	ko01110//Biosynthesis of secondary metabolites;ko00941//Flavonoid biosynthesis	Biosynthesis of other secondary metabolites;Global and overview maps	Metabolism
Com_79_neg	3-Hydroxybutyrate	Organic Acid And Its Derivatives	NEG	104.104	C4H8O3	1.13	31460	18400	54836	65800	71950	37650	64950	45840	54630	49660	75549	50090	165300	145200	176900	30680	62802	12570	79050	89380	132100	114100	125400	125500	65960	93580	117900	180900	146900	150400	49470	85020	89610	99310	--	--	-	-	-	-
Com_80_neg	3-Hydroxyanthranilic Acid	Benzoic acids and derivatives	NEG	153.135	C7H7NO3	4.45	153700	248900	178600	272100	354000	275600	158500	190300	154800	149100	139400	229100	327000	315600	286500	214000	238200	172800	236700	313000	282700	357200	636900	455400	370200	416100	461700	493800	536300	639500	293300	277600	305700	279400	548-93-6	HMDB0001476	C00632	ko01100//Metabolic pathways;ko01120//Microbial metabolism in diverse environments;ko00380//Tryptophan metabolism	Amino acid metabolism;Global and overview maps	Metabolism
Com_81_neg	beta-D-glucopyranosyl-caffeic acid	Polyphenol	NEG	344.31	C15H20O9	5.29	16320	39880	15300	22970	27470	40670	22660	22700	24870	29390	23900	35490	26740	18150	13320	10390	15960	12970	15260	18310	18790	20030	24890	14050	21190	16550	26170	7879	10840	10190	22520	26890	23570	19340	--	--	-	-	-	-
Com_82_neg	Lysope 14:0	Phospholipid	NEG	425.5	C19H40NO7P	11.27	4794	4357	4078	6776	5376	3063	5682	7345	5914	4900	5476	8964	7518	8037	6526	4505	3306	2615	4936	5846	6147	6950	5618	3645	5672	8486	13380	7174	7465	6285	4104	5450	3876	4302	--	--	-	-	-	-
Com_83_neg	Lysope 16:0	Phospholipid	NEG	453.55	C21H44NO7P	12.48	323700	99000	432000	527100	485200	482800	531700	585800	340500	456800	681300	789200	60220	198800	4355	338900	298600	385800	402900	534800	349400	356200	47320	35960	639200	643100	1068000	404600	247800	288600	217900	193400	184400	187300	--	--	-	-	-	-
Com_84_neg	Lysope 18:1	Phospholipid	NEG	479.588	C23H46NO7P	12.81	34330	16710	60860	47870	36950	36910	47020	37890	33380	28600	32900	46170	6219	8822	3180	40410	32340	38880	49540	69260	66330	32920	15080	13100	21590	18440	29140	14420	14940	10670	20200	18220	21120	19800	--	--	-	-	-	-
Com_85_neg	Mevalonic acid	Fatty Acyls	NEG	148.157	C6H12O4	18.48	412200	410000	387000	398500	406800	410800	391400	398800	380200	407500	418500	410800	404700	412400	410000	413400	394100	368600	346900	401000	385900	389400	386500	382500	369800	393900	384400	372100	371600	371900	367700	394500	370500	407300	17817-88-8	HMDB0000227	C00418	ko01100//Metabolic pathways;ko01110//Biosynthesis of secondary metabolites;ko00900//Terpenoid backbone biosynthesis	Global and overview maps;Metabolism of terpenoids and polyketides	Metabolism
Com_86_neg	N-Acetylalanine	Amino Acid And Derivatives	NEG	131.13	C5H9NO3	2.15	16970	19230	17220	13400	13320	13240	11360	12470	10700	12150	12620	10380	24570	27560	30600	33900	39240	26430	25830	30610	27240	17310	20830	22050	33900	35270	34780	40670	51990	39750	24900	22590	21930	21430	-	HMDB0255053	-	-	-	-
Com_87_neg	Neohesperidin dihydrochalcone	Flavanones	NEG	612.576	C28H36O15	6.43	6111	3786	2650	4490	5357	7412	6036	6520	3580	2751	2357	5052	3840	6938	7330	7342	6653	8452	16710	13870	7208	8124	9148	11420	11777	13368	14588	23550	34330	33210	7294	6880	8115	2639	20702-77-6	HMDB0030542	-	-	-	-
Com_88_neg	2-(Formylamino)benzoic acid	Benzoic acids and derivatives	NEG	165.043	C8H7NO3	5.47	16860	14320	19980	24760	20650	18750	13780	13110	19540	33100	23330	28540	32830	16640	31170	22060	16790	7676	10430	16300	19730	23130	24690	14550	19130	26520	25660	15640	18970	14860	30290	20410	23450	25880	3342-77-6	HMDB0004089	C05653	ko01100//Metabolic pathways;ko00380//Tryptophan metabolism	Amino acid metabolism;Global and overview maps	Metabolism
Com_89_neg	Kaempferol	Flavones and Flavonols	NEG	286.24	C15H10O6	8.811	5170	8972	5329	6429	9444	17410	13160	16550	11540	15600	20430	19130	6181	8441	2975	7300	4949	6853	6887	9889	5509	10380	7299	16830	9813	8060	10188	3061	3685	7764	5284	8527	8305	10080	520-18-3	HMDB0005801	C05903	ko01100//Metabolic pathways;ko01110//Biosynthesis of secondary metabolites;ko00944//Flavone and flavonol biosynthesis;ko00941//Flavonoid biosynthesis	Biosynthesis of other secondary metabolites;Global and overview maps	Metabolism
Com_90_neg	Anthranilate O-hexosyl-O-hexoside	Benzoic acids and derivatives	NEG	461.1	C19H27NO12	0.98	5414	6986	2078	5811	5824	5438	4163	5510	2902	10010	3744	2939	3990	13010	6722	3902	3984	9650	4630	2114	3831	8563	7220	4993	4369	5035	8685	7752	5892	4090	5780	5025	6002	4986	--	--	-	-	-	-
Com_91_neg	1-Indanone	Pyridines and derivatives	NEG	132.16	C9H8O	18.28	3994000	4289000	4280000	4460000	4494000	4422000	4800000	4824000	4541000	4337000	4318000	3816000	4080000	4227000	4267000	5207000	4920000	4988000	5044000	4537000	4555000	4758000	5111000	4907000	4825000	4981000	4956000	5019000	4942000	4814000	5190000	4805000	4256000	3995000	-	HMDB0059602	C01504	ko01120//Microbial metabolism in diverse environments	Global and overview maps	Metabolism
Com_92_neg	Anthraquinone-2-carboxylic Acid	Anthracenes	NEG	252.222	C15H8O4	9.72	308500	321100	333600	441400	429900	450700	468900	451600	387300	400200	410200	463400	522200	459800	479200	275300	271400	317100	445700	424100	416600	428100	528400	538900	456400	466800	521900	523300	466500	546000	383900	442700	458300	440800	--	--	-	-	-	-
Com_93_neg	4-Hydroxyquinazoline	Organoheterocyclic compounds	NEG	146.146	C8H6N2O	5.54	94170	133900	90040	23200	28280	28700	22840	31190	22960	26220	45880	28400	39010	10480	37540	147700	139600	115700	50730	74080	54440	79400	168800	96070	76200	88120	94620	47880	58820	39810	40660	54530	52350	28670	-	HMDB0246465	-	-	-	-
Com_94_neg	Kuwanon A	Flavonoids	NEG	420.454	C25H24O6	0.7	6063	23880	6436	9344	8522	7836	5566	5111	12180	15180	8709	13690	22880	12060	33380	4301	6762	6661	6366	10240	10320	3404	10450	8205	6795	3365	11399	9828	15210	14810	6728	5625	7484	7145	62949-77-3	HMDB0029505	-	-	-	-
Com_95_neg	Kinsenoside	Carbohydrates And Its Derivatives	NEG	264.229	C10H16O8	3.93	10580	13950	11260	21490	22890	18100	13540	17070	11220	13990	12930	23270	30860	22850	30150	7819	10810	5305	12790	16700	16800	11900	19710	14120	17170	21960	26080	35450	33690	42480	15100	16290	16510	17630	--	--	-	-	-	-
Com_96_neg	Isocitrate	Organic Acid And Its Derivatives	NEG	192.124	C6H8O7	1.49	3455000	5102000	2899000	11890000	7989000	12820000	15530000	16690000	13340000	18120000	15130000	21900000	57000000	24570000	41260000	5577000	7217000	4941000	11770000	10630000	16960000	19190000	38880000	24970000	23080000	30060000	32780000	32350000	37390000	47900000	18490000	23850000	18450000	19800000	-	HMDB0304324	C00311	ko01100//Metabolic pathways;ko01110//Biosynthesis of secondary metabolites;ko01120//Microbial metabolism in diverse environments;ko01230//Biosynthesis of amino acids;ko01200//Carbon metabolism;ko01210//2-Oxocarboxylic acid metabolism;ko00630//Glyoxylate and dicarboxylate metabolism;ko00020//Citrate cycle (TCA cycle)	Carbohydrate metabolism;Global and overview maps	Metabolism
Com_97_neg	Inosine diphosphate	Nucleotide And Its Derivates	NEG	522.149	C10H14N4O11P2	0.98	23560	38170	47050	11700	7378	12044	9346	12250	18930	17850	13650	10620	19160	18180	22170	44300	47480	29620	13290	9316	7335	7682	15560	13940	9400	16300	20470	12130	14870	4885	23610	24150	22670	14720	1986-04-04	HMDB0003335	C00104	ko01100//Metabolic pathways;ko00230//Purine metabolism	Global and overview maps;Nucleotide metabolism	Metabolism
Com_98_neg	Quercetin 3-O-sophoroside	Alkaloids and derivatives	NEG	626.524	C27H30O17	6.13	47080	44670	36950	33600	27400	32050	22750	37020	24690	27890	20350	44230	30860	14810	16110	4793	2753	2817	13843	18336	7013	15671	21521	17456	18716	19176	2865	14438	2899	19739	20920	20240	8016	13460	-	HMDB0304729	C12667	ko01110//Biosynthesis of secondary metabolites;ko00944//Flavone and flavonol biosynthesis	Biosynthesis of other secondary metabolites;Global and overview maps	Metabolism
Com_99_neg	Quinic acid O-di-glucuronic acid	Sugar Acids And Its Derivatives	NEG	544.1	C19H28O18	1.41	6987	4315	5138	6011	5135	5942	2580	5395	5156	6888	4325	2578	8635	6833	13880	6660	3449	5562	4040	4161	6082	6357	18790	4319	4434	10150	6233	6051	11000	10430	2541	6047	6088	6042	--	--	-	-	-	-
Com_100_neg	5-O-p-coumaroyl quinic acid O-hexoside	Alcohols and polyols	NEG	500.1	C22H28O13	7.3	10580	14470	8638	7617	9846	11750	4031	6454	5398	5712	4943	7497	14010	7102	6098	4544	10480	4214	5325	3774	5684	4030	3327	5449	5362	3283	7244	1736	6740	3815	4795	3699	5024	3854	--	--	-	-	-	-
Com_101_neg	Eudesmoyl quinic acid	Alcohols and polyols	NEG	386.1	C17H22O10	4.44	7715	8479	4224	5771	5091	5131	4284	4698	3243	5823	7165	7264	7154	6421	6980	3344	4538	6185	1965	6011	4428	6212	5751	3762	3900	3361	4083	7907	10610	7596	2660	4452	6752	5545	--	--	-	-	-	-
Com_102_neg	Melibiose	Carbohydrates And Its Derivatives	NEG	342.3	C12H22O11	0.96	10330000	8782000	8165000	15580000	19780000	16010000	9611000	13280000	10490000	9303000	7504000	9996000	16230000	12330000	8643000	3811000	3432000	4056000	20830000	15340000	12280000	9562000	17670000	12550000	7757000	9631000	10440000	9564000	14170000	13450000	13310000	11270000	11650000	12790000	13299-20-2	HMDB0000048	C05402	ko01100//Metabolic pathways;ko02010//ABC transporters;ko00052//Galactose metabolism	Carbohydrate metabolism;Global and overview maps;Membrane transport	Environmental Information Processing;Metabolism
Com_103_neg	Tricin O-saccharic acid	Flavonoids	NEG	522.1	C23H22O14	6.58	187600	298100	186500	67300	64530	76880	109200	103200	165200	162300	126200	249400	121800	95090	98650	165000	212800	216300	151700	163400	135500	185600	293700	200600	200300	300900	253100	134600	162100	152500	155700	191500	157100	109300	--	--	-	-	-	-
Com_104_neg	D-Panthotenate	Amino Acid And Derivatives	NEG	219.235	C9H17NO5	4.59	1012000	1472000	961100	1009000	1034000	1197000	1303000	1442000	1381000	1802000	1454000	2132000	3591000	2254000	2757000	864500	930400	798900	1082000	1065000	1207000	1449000	2619000	1862000	1648000	2044000	2030000	2116000	2499000	2800000	1665000	1707000	1570000	1495000	--	--	-	-	-	-
Com_105_neg	Oxyresveratrol	Phenylpropanoids and polyketides	NEG	244.24	C14H12O4	6.97	245200	352000	216800	129300	148900	166900	192900	148500	154900	104000	100900	170600	104900	119220	227230	120700	190200	97290	93590	112500	81020	145100	159900	204400	82720	101800	89660	129612	151870	144550	135000	130400	161500	140200	--	--	-	-	-	-
Com_106_neg	Phosphoenolpyruvate	Organic Acid And Its Derivatives	NEG	167.982	C3H5O6P	0.97	171700	177200	130400	37990	50400	66500	64950	81810	59100	40150	34060	56050	33000	40440	26170	179000	149900	114000	55200	50510	55090	41790	69990	87020	40300	46750	60610	17250	35350	19590	99700	64340	52820	63540	138-08-9	HMDB0000263	C00074	ko01100//Metabolic pathways;ko01110//Biosynthesis of secondary metabolites;ko01120//Microbial metabolism in diverse environments;ko01230//Biosynthesis of amino acids;ko01200//Carbon metabolism;ko00710//Carbon fixation in photosynthetic organisms;ko00010//Glycolysis / Gluconeogenesis;ko00400//Phenylalanine, tyrosine and tryptophan biosynthesis;ko00020//Citrate cycle (TCA cycle);ko00620//Pyruvate m…	Amino acid metabolism;Carbohydrate metabolism;Energy metabolism;Global and overview maps	Metabolism
Com_107_neg	Myristoleic acid	Fatty Acyls	NEG	226	C14H26O2	8.46	146000	163400	130200	69870	95570	77080	101800	97810	90360	81640	64260	116900	108300	88920	102900	80710	81380	65700	71080	60300	65400	76680	139900	117200	68460	71990	69840	75100	73940	75570	93260	98720	85050	104000	544-64-9	HMDB0002000	-	-	-	-
Com_108_neg	13-HpOTrE(r)	Fatty Acyls	NEG	310	C18H30O4	10.93	25740	30550	24920	31660	30430	29070	28810	27240	33790	29010	32960	21790	33540	28100	28250	32220	25290	30050	29070	35160	31480	24740	32630	31230	29770	25140	29520	30760	29430	28820	36170	27670	30440	28110	--	--	-	-	-	-
Com_109_neg	Bisulfurous Acid	Quinones	NEG	172.18	C11H8O2	0.95	34790	40620	25270	36290	31520	25450	37270	48550	17510	35140	23570	51540	49460	27290	34220	32660	26200	16000	18780	17710	22870	16480	17900	31210	37000	43950	36060	31170	29750	32630	26540	35180	27820	37340	--	--	-	-	-	-
Com_110_neg	Cinnamyl acetate	Benzene and substituted derivatives	NEG	176.21	C11H12O2	0.89	27080	44950	30980	41110	54320	62240	38910	56170	49170	57970	61700	56660	50550	47700	50680	19740	42990	21260	45940	34660	29530	43760	47000	27380	30500	48370	20430	27790	65900	31320	49080	33840	31520	49080	21040-45-9	HMDB0029699	-	-	-	-
Com_111_neg	Gamma-Linolenic Acid	Fatty Acyls	NEG	278.43	C18H30O2	14.62	1943	2579	3699	4528	1425	4537	5669	2671	4650	4884	3130	7907	5225	3379	9834	2905	3960	2281	8624	8153	3953	3942	5432	4257	8147	5822	9053	2445	4602	5498	3641	3523	2861	4022	506-26-3	HMDB0003073	C06426	ko01100//Metabolic pathways;ko00591//Linoleic acid metabolism;ko01040//Biosynthesis of unsaturated fatty acids	Global and overview maps;Lipid metabolism	Metabolism
Com_112_neg	Acetyl tryptophan	Amino Acid And Derivatives	NEG	246	C13H14N2O3	6.78	2596	642068	491322	4290	4352	3485	57100	72320	68940	1520000	898100	2026000	7740000	6050000	8987000	4117	4718	2377	5668	18600	9627	197500	362500	247700	3601000	5171000	5350000	3814000	3868000	4512000	1795000	1566000	1867000	1420000	--	--	-	-	-	-
Com_113_neg	Sibiricose A6	Phenylpropanoids	NEG	548.497	C23H32O15	5.49	9466	15640	4228	10050	16310	18790	6424	11220	6859	6479	7369	13250	6955	6445	7057	6064	2773	7904	8766	4289	11100	3426	9294	5209	15060	3654	8133	11880	7405	13400	7601	8252	9534	7209	--	--	-	-	-	-
Com_114_neg	2,4-Dihydroxybenzoic acid	Organic Acid And Its Derivatives	NEG	154.12	C7H6O4	4.623	5085	4069	3247	2708	6648	5981	3983	2564	3400	3135	4974	3438	8842	6974	8136	5186	2233	4666	5976	8264	3139	5112	5918	5577	6641	6506	10450	8290	6121	8899	5952	5874	5238	5699	89-86-1	HMDB0029666	-	-	-	-
Com_115_neg	Androsin	Phenols And Its Derivatives	NEG	328.319	C15H20O8	4.3	7673	8321	7047	3630	4143	4720	6462	5831	5503	4403	3221	4996	23980	15820	18870	28390	33110	27240	32800	43550	43480	31790	63600	46060	30320	29380	35360	34110	51600	56610	20990	19940	22720	23210	--	--	-	-	-	-
Com_116_neg	N-Acetyl-L-methionine	Amino Acid And Derivatives	NEG	191.25	C7H13NO3S	5.315	6153	15770	8486	22320	22140	25760	36580	43130	40600	30290	26380	36050	58430	52970	48950	31020	41730	31900	42510	41110	38890	70260	116900	84560	89280	102600	115700	54410	57480	58270	43570	39360	48840	39450	65-82-7	HMDB0011745	-	-	-	-
Com_117_neg	Octanedioic acid	Organic Acid And Its Derivatives	NEG	174.19	C8H14O4	6.649	76830	65021	59170	65430	54530	54378	60460	66990	58530	53190	60610	73580	65520	56490	64080	69600	65960	79880	61500	49740	65510	75630	62180	72400	67950	68460	65150	61500	65050	57440	74780	64710	58980	58670	505-48-6	HMDB0000893	-	-	-	-
Com_118_neg	Indole-2-carboxylic acid	Indoles and derivatives	NEG	161.16	C9H7NO2	0.927	12100	13920	22380	13650	15630	9967	7483	13860	8392	10970	13830	12360	18500	14900	21800	10460	12750	22560	8568	11820	8489	14910	24980	11060	13480	19250	5745	8279	21660	22940	10650	21950	10640	8817	1477-50-5	HMDB0002285	-	-	-	-
Com_119_neg	Tartaric acid	Organic Acid And Its Derivatives	NEG	150.09	C4H6O6	1.008	167100	181600	158400	177800	237800	188200	184900	190400	178300	121500	127500	187000	193900	153400	221600	87940	100700	82800	100400	89610	72830	129000	97850	121400	116300	176900	156600	119800	169700	126500	122800	115600	118700	113900	-	HMDB0303005	C00898	ko01100//Metabolic pathways;ko00630//Glyoxylate and dicarboxylate metabolism	Carbohydrate metabolism;Global and overview maps	Metabolism
Com_120_neg	Terephthalic acid	Benzoic acids and derivatives	NEG	166.13	C8H6O4	5.801	820900	776600	730700	835300	725500	740000	776200	824000	654790	763100	800800	746700	802620	713510	861800	645370	820300	810100	772400	712100	710700	607580	731300	765900	772600	706800	733800	774700	753580	638200	727500	688200	801400	736200	100-21-0	HMDB0002428	C06337	ko01100//Metabolic pathways;ko01120//Microbial metabolism in diverse environments;ko01220//Degradation of aromatic compounds	Global and overview maps	Metabolism
Com_121_neg	Luteolin	Flavones and Flavonols	NEG	286.24	C15H10O6	8.06	77200	89010	80620	25960	31780	51460	54390	66010	68180	106600	93370	115100	44050	31850	87540	276800	263300	179900	136200	173400	146700	86790	125800	104200	193800	150300	197600	100400	102000	111900	110000	108200	110300	90580	491-70-3	HMDB0005800	C01514	ko01100//Metabolic pathways;ko01110//Biosynthesis of secondary metabolites;ko00944//Flavone and flavonol biosynthesis;ko00941//Flavonoid biosynthesis	Biosynthesis of other secondary metabolites;Global and overview maps	Metabolism
Com_122_neg	Ferulic Acid	Polyphenol	NEG	194.19	C10H10O4	6.881	160700	200300	164800	60110	78190	108000	82880	63910	85540	98770	87680	155400	131200	95700	126600	227500	252800	203500	84170	102100	136100	62230	101800	75870	178200	160200	208200	74200	63950	64640	125600	97080	122100	136000	537-98-4	HMDB0000954	C01494	ko01100//Metabolic pathways;ko01110//Biosynthesis of secondary metabolites;ko00940//Phenylpropanoid biosynthesis	Biosynthesis of other secondary metabolites;Global and overview maps	Metabolism
Com_123_neg	Hesperidin	Flavanones	NEG	610.56	C28H34O15	7.09	8045	12940	10680	17670	12900	9537	6773	7299	7868	6877	10170	14300	42310	62850	37610	351100	280100	295000	172400	209200	261400	156200	289000	206900	234900	264000	320500	294700	295100	278800	133500	145400	121500	130200	520-26-3	HMDB0003265	-	-	-	-
Com_124_neg	Chlorogenic Acid	Alcohols and polyols	NEG	354.31	C16H18O9	5.37	39380000	43820000	37700000	22510000	25520000	34960000	29010000	29760000	28100000	24570000	22390000	34820000	22700000	15280000	13320000	3024000	3078000	2453000	3139000	3504000	3315000	2102000	2853000	2469000	4649000	4758000	6038000	3418000	3547000	3567000	17020000	17030000	16020000	16510000	202650-88-2	HMDB0003164	C00852	ko01110//Biosynthesis of secondary metabolites;ko00941//Flavonoid biosynthesis;ko00940//Phenylpropanoid biosynthesis;ko00945//Stilbenoid, diarylheptanoid and gingerol biosynthesis	Biosynthesis of other secondary metabolites;Global and overview maps	Metabolism
Com_125_neg	Adipic acid	Organic Acid And Its Derivatives	NEG	146.058	C6H10O4	0.86	4918000	3831000	3675000	338100	330100	258100	410100	382800	407000	255500	267900	266700	783100	952800	866700	7576000	6672000	7649000	409400	577200	562700	695100	641400	621300	762500	815900	1028000	936500	768800	827800	1575000	1698000	1551000	1634000	124-04-9	HMDB0000448	C06104	ko01100//Metabolic pathways;ko01120//Microbial metabolism in diverse environments;ko01220//Degradation of aromatic compounds	Global and overview maps	Metabolism
Com_126_neg	2-Oxoadipic acid	Organic Acid And Its Derivatives	NEG	160.037	C6H8O5	0.72	492800	455800	389400	510700	532400	598000	458000	516200	492900	522400	461500	561800	688700	563300	542900	414300	393500	373000	519600	550200	588300	551200	734700	648900	459100	519200	584200	621400	668700	696000	610200	517700	561700	575700	3184-35-8	HMDB0000225	C00322	ko01100//Metabolic pathways;ko01110//Biosynthesis of secondary metabolites;ko01120//Microbial metabolism in diverse environments;ko01230//Biosynthesis of amino acids;ko01210//2-Oxocarboxylic acid metabolism;ko00310//Lysine degradation;ko00380//Tryptophan metabolism;ko00300//Lysine biosynthesis	Amino acid metabolism;Global and overview maps	Metabolism
Com_127_neg	Quercetin O-acetylhexoside	Flavones and Flavonols	NEG	506.1	C23H22O13	6.9	24960	61530	54670	44270	59910	76640	96400	114600	156800	76690	83930	82560	83590	85220	102200	55238	52712	48520	53700	52986	54981	63401	91944	83615	13530	51865	58547	66893	81527	83043	42450	39900	46010	32630	--	--	-	-	-	-
Com_128_neg	Sorbitol 6-phosphate	Carbohydrates And Its Derivatives	NEG	262.045	C6H15O9P	0.86	188400	165600	167500	151600	150900	167100	203600	171100	189200	199900	207800	236200	212000	191900	156500	146000	185300	160600	203200	173200	196200	234300	263500	177000	371300	236600	214600	191600	195400	278600	214200	200600	206400	216200	20479-58-7	HMDB0005831	C01096	ko01100//Metabolic pathways;ko00051//Fructose and mannose metabolism	Carbohydrate metabolism;Global and overview maps	Metabolism
Com_129_neg	dADP	Nucleotide And Its Derivates	NEG	411.202	C10H15N5O9P2	0.75	52310	39030	43870	49480	52080	51590	49220	55760	58370	49950	51150	43710	45350	58310	44440	49530	45710	57470	45830	40590	61530	59180	53690	61910	55860	54210	58060	49540	42100	42220	55650	50860	56550	47700	2793-06-08	HMDB0001508	C00206	ko01100//Metabolic pathways;ko00230//Purine metabolism	Global and overview maps;Nucleotide metabolism	Metabolism
Com_130_neg	Caffeic acid	Cinnamic acids and derivatives	NEG	180.16	C9H8O4	5.801	11940000	14830000	10710000	5678000	5511000	11440000	7720000	8545000	8584000	7697000	5649000	8854000	5997000	3141000	3098000	1245000	1314000	1208000	981400	1008000	879700	731100	1010000	856400	1173000	1246000	1586000	794300	875000	974600	4132000	3963000	3910000	4510000	4361-87-9	HMDB0003501	-	-	-	-
Com_131_neg	N-Acetylornithine	Amino Acid And Derivatives	NEG	174.2	C7H14N2O3	0.896	149600	273900	171000	355800	289500	345800	403100	332800	404400	403200	263500	373400	542200	375100	520400	248600	230800	177900	275800	333100	429800	488600	492200	489000	255900	298800	374900	575400	461400	743900	365500	289200	432000	370500	2185-16-2	HMDB0240589	C00437	ko01100//Metabolic pathways;ko01110//Biosynthesis of secondary metabolites;ko01230//Biosynthesis of amino acids;ko01210//2-Oxocarboxylic acid metabolism;ko00220//Arginine biosynthesis	Amino acid metabolism;Global and overview maps	Metabolism
Com_132_neg	H-HoArg-OH	Amino Acid And Derivatives	NEG	188.23	C7H16N4O2	0.807	9254	6447	10360	25630	18670	29050	32480	36000	67540	35390	24200	48930	24790	22900	19280	7881	22520	20070	14560	19420	11450	19490	17480	18320	20850	22920	14570	22880	11820	22617	14080	25650	13580	18140	--	--	-	-	-	-
Com_133_neg	Thiamine pyrophosphate	Vitamins	NEG	460.77	C12H19ClN4O7P2S	0.915	4255	1991	3005	4082	3631	4240	4113	4134	4122	3267	3754	5625	3671	6531	5761	3238	4211	5142	5310	4677	2639	6044	5792	6077	3611	4831	7822	3238	3221	2275	2167	4062	4888	5024	136-09-4	HMDB0001372	C00068	ko01100//Metabolic pathways;ko00010//Glycolysis / Gluconeogenesis;ko00020//Citrate cycle (TCA cycle);ko00620//Pyruvate metabolism;ko00730//Thiamine metabolism;ko00640//Propanoate metabolism;ko00280//Valine, leucine and isoleucine degradation	Amino acid metabolism;Carbohydrate metabolism;Global and overview maps;Metabolism of cofactors and vitamins	Metabolism
Com_134_neg	D-Glucuronic acid	Carbohydrates And Its Derivatives	NEG	194.14	C6H10O7	0.894	74940	86340	84550	96660	102200	115400	122700	108200	122800	95420	112900	91450	143400	141100	124300	57420	51150	37620	95040	79650	84430	64890	140500	95090	97360	96950	88823	93470	120300	119900	88530	87460	78880	101600	32449-92-6	HMDB0006355	-	-	-	-
Com_135_neg	Ureidosuccinic acid	Amino Acid And Derivatives	NEG	176.13	C5H8N2O5	1.031	326600	293200	252600	588900	545500	559200	1123000	1143000	1171000	1379000	1220000	1522000	2723000	2369000	2703000	356300	344300	327300	1075000	900200	1107000	1472000	2239000	1585000	2809000	3299000	2987000	2591000	2720000	3045000	1494000	1464000	1521000	1480000	13184-27-5	HMDB0000828	C00438	ko01100//Metabolic pathways;ko00240//Pyrimidine metabolism;ko00250//Alanine, aspartate and glutamate metabolism	Amino acid metabolism;Global and overview maps;Nucleotide metabolism	Metabolism
Com_136_neg	L-Lactic acid	Organic Acid And Its Derivatives	NEG	90.08	C3H6O3	1.487	13310	11910	8524	7718	5695	8893	4299	3599	6151	5182	4160	5611	12480	11070	7772	7768	7408	6502	7512	5209	6631	5887	12240	6317	3279	7572	7898	10900	10890	8910	9285	9002	6673	7759	10326-41-7	HMDB0001311	C00186	ko01100//Metabolic pathways;ko01110//Biosynthesis of secondary metabolites;ko01120//Microbial metabolism in diverse environments;ko00010//Glycolysis / Gluconeogenesis;ko00051//Fructose and mannose metabolism;ko00620//Pyruvate metabolism;ko00640//Propanoate metabolism	Carbohydrate metabolism;Global and overview maps	Metabolism
Com_137_neg	Arachidonic acid	Fatty Acyls	NEG	304.47	C20H32O2	6.881	29840	51360	26370	12869	5190	15500	21980	15450	18060	7594	9947	16250	27900	17970	20130	42340	28880	32020	9227	5124	7634	5154	16130	11650	22950	15100	21580	16960	12980	20640	6798	14440	13730	21510	506-32-1	HMDB0001043	C00219	ko01100//Metabolic pathways;ko00591//Linoleic acid metabolism;ko01040//Biosynthesis of unsaturated fatty acids;ko00590//Arachidonic acid metabolism	Global and overview maps;Lipid metabolism	Metabolism
Com_138_neg	Uridine 5'-Diphospho-N-Acetylgalactosamine	Nucleotide And Its Derivates	NEG	607.354	C17H27N3O17P2	1	31410	48530	23790	58780	57720	73550	74650	97690	75830	141400	124800	189900	337600	129300	184100	56810	62750	57610	75000	81090	71280	102100	184500	116600	91430	140700	137100	108000	136900	99820	103300	76570	100800	82310	7277-98-7	HMDB0000304	-	-	-	-
Com_139_neg	UDP-galactose	Nucleotide And Its Derivates	NEG	610.265	C15H22N2Na2O17P2	0.92	1788000	2129000	1078000	1716000	1484000	1621000	1302000	1706000	1118000	1502000	1455000	1826000	2336000	1238000	1457000	4404000	4048000	3580000	2428000	2364000	2506000	3305000	4386000	3336000	2075000	2099000	2511000	884200	1238000	1208000	2085000	2135000	1983000	2047000	1955-26-6	HMDB0012305	C00052	ko01100//Metabolic pathways;ko00052//Galactose metabolism;ko00520//Amino sugar and nucleotide sugar metabolism	Carbohydrate metabolism;Global and overview maps	Metabolism
Com_140_neg	UDP-D-glucuronate	Nucleotide And Its Derivates	NEG	580.285	C15H22N2O18P2	0.94	17600	36950	13920	14010	18330	25620	31250	12640	15490	19490	10480	17710	16640	12420	11220	41690	42280	50210	38580	48850	52140	32400	85550	36220	36650	43820	44820	12810	20430	20560	28580	32940	19870	20640	2616-64-0	HMDB0000935	C00167	ko01100//Metabolic pathways;ko00520//Amino sugar and nucleotide sugar metabolism;ko00040//Pentose and glucuronate interconversions;ko00053//Ascorbate and aldarate metabolism	Carbohydrate metabolism;Global and overview maps	Metabolism
Com_141_neg	Ribose 1-phosphate	Carbohydrates And Its Derivatives	NEG	230.11	C5H11O8P	0.9	1169000	1024000	1021000	731200	694000	699100	949400	1026000	851200	1150000	1488000	1319000	2069000	1518000	968700	1204000	1385000	1296000	776900	745100	842600	812300	1146000	836700	1167000	1193000	1293000	971500	1633000	1100000	990200	950000	1093000	1205000	14075-00-4	HMDB0001489	C00620	ko01100//Metabolic pathways;ko00230//Purine metabolism;ko00030//Pentose phosphate pathway	Carbohydrate metabolism;Global and overview maps;Nucleotide metabolism	Metabolism
Com_142_neg	s7p	Carbohydrates And Its Derivatives	NEG	425.473	C7H13BaO10P	0.87	676600	1088000	680500	548100	572700	1062000	606900	495400	801900	300300	237300	403000	136800	111200	237500	1246000	584900	505000	403700	633500	666300	725400	1075000	651800	326000	317300	260300	102300	85400	107900	323500	403900	500700	509000	--	--	-	-	-	-
Com_143_neg	Succinic acid	Tca Cycle	NEG	118.09	C4H6O4	1.936	3519000	4733000	4102000	5102000	5690000	6257000	4446000	4994000	4584000	4368000	3693000	5003000	7525000	5413000	6272000	2863000	2747000	2473000	7126000	7591000	7365000	5030000	8989000	6644000	5343000	6189000	5711000	3444000	4072000	4133000	5173000	5338000	5134000	5056000	110-15-6	HMDB0000254	C00042	ko01100//Metabolic pathways;ko01110//Biosynthesis of secondary metabolites;ko01120//Microbial metabolism in diverse environments;ko01200//Carbon metabolism;ko00310//Lysine degradation;ko00630//Glyoxylate and dicarboxylate metabolism;ko00760//Nicotinate and nicotinamide metabolism;ko00250//Alanine, aspartate and glutamate metabolism;ko00020//Citrate cycle (TCA cycle);ko01220//Degradation of aromat…	Amino acid metabolism;Carbohydrate metabolism;Energy metabolism;Global and overview maps;Metabolism of cofactors and vitamins	Metabolism
Com_144_neg	Ribitol	Sugar Alcohols	NEG	152.15	C5H12O5	0.927	147000	154100	163500	172100	165200	176500	153800	162300	158300	158900	142400	172600	181600	146400	173400	111200	107800	128100	161800	156200	189700	141400	183700	208000	148300	150200	125700	198300	188100	205300	164300	161200	155400	159300	488-81-3	HMDB0000508	C00474	ko01100//Metabolic pathways;ko00040//Pentose and glucuronate interconversions;ko00740//Riboflavin metabolism	Carbohydrate metabolism;Global and overview maps;Metabolism of cofactors and vitamins	Metabolism
Com_145_neg	3-O-p-coumaroyl quinic acid O-hexoside	Alcohols and polyols	NEG	500.2	C22H28O13	7.3	6871	16420	11630	5551	7445	13150	8245	7047	10730	6949	5705	6398	6726	6897	6826	3545	6575	7312	5349	3049	7441	6019	3818	5970	6695	11400	7081	4394	7557	7577	6424	4324	3521	5047	--	--	-	-	-	-
Com_146_neg	1-O-p-Coumaroyl quinic acid	Alcohols and polyols	NEG	338.1	C16H18O8	5.95	36430000	47810000	37270000	18690000	21390000	26940000	23390000	25390000	24700000	24020000	20360000	33190000	21600000	13610000	13650000	624300	677000	476400	550900	645000	559500	597700	978500	708000	803200	950300	1074000	1055000	1095000	1247000	13700000	13370000	13350000	12630000	--	--	-	-	-	-
Com_147_neg	D-Galactaric acid	Carbohydrates And Its Derivatives	NEG	210.038	C6H10O8	0.87	502200	951200	966500	733300	762600	998200	2941000	2112000	3406000	3012000	2294000	3035000	2338000	1367000	1431000	254700	296300	215500	752300	485300	720300	921100	1457000	1515000	681400	653100	849200	539500	836800	867800	1163000	1029000	1170000	1070000	526-99-8	HMDB0000639	C00879	ko01100//Metabolic pathways;ko00053//Ascorbate and aldarate metabolism	Carbohydrate metabolism;Global and overview maps	Metabolism
Com_148_neg	alpha-Arbutin	Carbohydrates And Its Derivatives	NEG	272.25	C12H16O7	2.33	83390	122800	80440	105500	111100	122400	122200	118400	122500	120600	102000	163800	200200	132100	139400	66010	68640	55790	93270	104000	105800	109000	158400	135100	89550	107100	111200	108600	133700	137900	106100	112800	106200	112700	--	--	-	-	-	-
Com_149_neg	Koaburaside	Phenolic acids	NEG	332.111	C14H20O9	4.68	39940	42490	38400	58230	56660	59530	44680	56680	44100	37590	36680	46060	78330	54170	50780	23120	20800	11720	41370	44420	41930	36490	51370	56900	29890	31560	37940	61700	77110	87820	40440	41890	41270	46970	--	--	-	-	-	-
Com_150_neg	Ribose 5-phosphate	Carbohydrates And Its Derivatives	NEG	230.02	C5H11O8P	0.84	375500	263000	313700	203600	180300	258800	305100	230000	401300	508700	606500	742700	1089000	570000	742500	563200	458700	481700	283200	188500	279000	181200	255100	165600	316900	995800	620600	873800	798500	951800	527400	511700	538700	624100	34980-65-9	HMDB0001548	C00117	ko01100//Metabolic pathways;ko01110//Biosynthesis of secondary metabolites;ko01120//Microbial metabolism in diverse environments;ko01230//Biosynthesis of amino acids;ko01200//Carbon metabolism;ko00230//Purine metabolism;ko00030//Pentose phosphate pathway;ko00710//Carbon fixation in photosynthetic organisms;ko00750//Vitamin B6 metabolism	Carbohydrate metabolism;Energy metabolism;Global and overview maps;Metabolism of cofactors and vitamins;Nucleotide metabolism	Metabolism
Com_151_neg	3-Ureidopropionate	Organic Acid And Its Derivatives	NEG	132.053	C4H8N2O3	0.82	1802000	2214000	1592000	4759000	4499000	3662000	3270000	4735000	3659000	7587000	6710000	8591000	10070000	10590000	9723000	1583000	1555000	1446000	3054000	3102000	3367000	1925000	2619000	2338000	6641000	7354000	7078000	7603000	9963000	9674000	5303000	5496000	5840000	4887000	462-88-4	HMDB0000026	C02642	ko01100//Metabolic pathways;ko00240//Pyrimidine metabolism;ko00410//beta-Alanine metabolism;ko00770//Pantothenate and CoA biosynthesis	Global and overview maps;Metabolism of cofactors and vitamins;Metabolism of other amino acids;Nucleotide metabolism	Metabolism
Com_152_neg	Ayapin	Coumarins and derivatives	NEG	188.041	C11H8O3	7.3	79640	87400	77610	76770	85570	65950	72230	74460	62090	73570	97620	92450	79680	81370	87060	69980	82850	79210	85160	76770	103200	71070	107800	72050	108100	80770	72950	93720	115700	102700	92540	77040	93860	81920	494-56-4	HMDB0301806	-	-	-	-
Com_153_neg	(2S)-2-Isopropylmalate	Organic Acid And Its Derivatives	NEG	176.068	C7H12O5	5.52	182600	193700	144500	6421	12670	8065	4300	30866	5688	10250	13620	13420	25030	12090	18380	178400	173700	148400	15260	31223	5105	4433	10100	36467	44550	39220	34550	21810	24110	22020	36030	41410	40640	43170	--	--	-	-	-	-
Com_154_neg	Malonic acid	Organic Acid And Its Derivatives	NEG	104.011	C3H4O4	1.19	82217	33040	46550	113100	84330	110000	86500	95640	86580	64580	49790	86610	250700	212100	265700	24030	21260	36090	207300	106400	218500	149300	305000	235800	131300	202700	211400	292800	316600	290000	140600	147600	148000	116100	141-82-2	HMDB0000691	C00383	ko01100//Metabolic pathways;ko00240//Pyrimidine metabolism;ko00410//beta-Alanine metabolism;ko00061//Fatty acid biosynthesis;ko01212//Fatty acid metabolism	Global and overview maps;Lipid metabolism;Metabolism of other amino acids;Nucleotide metabolism	Metabolism
Com_155_neg	Guanine	Purines and purine derivatives	NEG	151.126	C5H5N5O	2.77	351200	468800	340100	284000	352800	348400	400400	416400	435300	609700	444400	787600	537200	447200	501700	519000	528800	443700	320100	436700	350300	547000	875300	588800	836200	976900	1036000	466300	558400	594400	524800	495000	515100	510700	73-40-5	HMDB0000132	C00242	ko01100//Metabolic pathways;ko00230//Purine metabolism	Global and overview maps;Nucleotide metabolism	Metabolism
Com_156_neg	Jasmonic acid	Phytohormones	NEG	210.27	C12H18O3	8.98	6596	4445	2959	4708	2688	2082	10980	6954	6904	8730	14100	13120	12950	10100	13930	9959	10024	8968	11320	12910	10800	12750	20060	20040	12450	12110	16810	8879	10220	9972	11860	9003	8725	7483	59366-47-1	HMDB0032797	C08491	ko01100//Metabolic pathways;ko01110//Biosynthesis of secondary metabolites;ko00592//alpha-Linolenic acid metabolism;ko04075//Plant hormone signal transduction	Global and overview maps;Lipid metabolism;Signal transduction	Environmental Information Processing;Metabolism
Com_157_neg	Kaempferol7-O-beta-D-glucopyranoside	Flavones and Flavonols	NEG	448.377	C21H20O11	6.65	2695000	2812000	1963000	1561000	1429000	1518000	917800	1109000	1156000	1051000	956000	1805000	1043000	637300	306500	1680000	2106000	1457000	2379000	3573000	2955000	1726000	2394000	1976000	2142000	1726000	3741000	1284000	1394000	1687000	1981000	1510000	1829000	1523000	--	--	-	-	-	-
Com_158_neg	cis-4-Hydroxy-D-proline	Organic Acid And Its Derivatives	NEG	131.13	C5H9NO3	2.26	21520	26570	17400	92080	102800	107400	177300	211800	177900	111800	94400	153400	229200	200400	237000	22720	24600	17000	91910	102100	90200	237900	332500	269900	234800	268100	319800	213200	256700	258100	142800	157100	153000	148300	2584-71-6	HMDB0060460	C03440	ko01100//Metabolic pathways	Global and overview maps	Metabolism
Com_159_neg	Ala-trp	Amino Acid And Derivatives	NEG	275.303	C14H17N3O3	0.9	196400	168500	131900	67730	68540	47970	52310	53600	35760	51240	32250	42860	203100	167500	177000	469100	524700	548800	104600	178800	144800	67340	202300	88830	171400	215000	327200	119300	149000	142800	175100	148800	138100	137400	16305-75-2	HMDB0013209	-	-	-	-
Com_160_neg	D-Fructose 6-Phosphate	Carbohydrates And Its Derivatives	NEG	260.136	C6H13O9P	0.86	5839000	5613000	5152000	4551000	4344000	4812000	6169000	6356000	5406000	4063000	4518000	4889000	5965000	4446000	2613000	4412000	4987000	4068000	4283000	3536000	4493000	5279000	6854000	4659000	3240000	2867000	3494000	2182000	4019000	3851000	4410000	3831000	4294000	4434000	-	HMDB0304311	C00085	ko01100//Metabolic pathways;ko01110//Biosynthesis of secondary metabolites;ko01120//Microbial metabolism in diverse environments;ko01200//Carbon metabolism;ko00052//Galactose metabolism;ko00710//Carbon fixation in photosynthetic organisms;ko00500//Starch and sucrose metabolism;ko04931//Insulin resistance	Carbohydrate metabolism;Endocrine and metabolic disease;Energy metabolism;Global and overview maps	Human Diseases;Metabolism
Com_161_neg	deoxyribose-phosphate	Nucleotide And Its Derivates	NEG	226.08	C5H7O8P	0.97	110200	66390	126600	68960	49960	63650	110100	79830	126500	114100	117000	115400	189600	139500	155200	75390	118400	99550	71260	64270	92540	99410	147000	91660	100400	149600	131500	134400	145600	151000	81770	93730	111900	128400	--	--	-	-	-	-
Com_162_neg	Spiraeoside	Flavonoids	NEG	464.096	C21H20O12	6.59	1441000	1488000	1219000	821700	823900	911300	563800	822800	611200	739400	805000	1049000	657800	331600	459500	40390	39650	87433	82220	106100	81800	34350	105400	83770	28090	19980	49690	116100	141000	160500	445700	438900	453300	457800	20229-56-5	HMDB0037932	-	-	-	-
Com_163_neg	Saponarin	Flavonoids	NEG	594.518	C27H30O15	6.27	212400	270400	217700	121100	145400	130100	101300	116600	107800	122400	115400	193500	1281000	2234000	1958000	13820000	12110000	9323000	6481000	9451000	7841000	8407000	14060000	7989000	11780000	10780000	13800000	3423000	3757000	3425000	4058000	3886000	3969000	4574000	-	HMDB0257484	-	-	-	-
Com_164_neg	Butanedioicacid	Terpenoids	NEG	532.588	C28H36O10	6.71	526100	580900	352900	721700	716000	752500	461800	520000	436300	808200	667600	1098000	1795000	1117000	1422000	321968	5701	312301	336401	384213	331684	406445	566511	436452	5093	415123	7114	40200	25560	61160	368200	402900	435700	381300	--	--	-	-	-	-
Com_165_neg	P-Coumaryl Alcohol	Phenylpropanoids and polyketides	NEG	150.174	C9H10O2	1.04	523700	484500	485800	580400	598700	497700	384200	550400	401000	328800	398200	471700	514000	483600	512500	256400	246100	252400	272000	247500	238000	256900	315000	208300	412600	406500	475900	378300	437400	439100	358600	371800	362800	385100	20649-40-5	HMDB0003654	C02646	ko01100//Metabolic pathways;ko01110//Biosynthesis of secondary metabolites;ko00940//Phenylpropanoid biosynthesis	Biosynthesis of other secondary metabolites;Global and overview maps	Metabolism
Com_166_neg	O-Phospho-L-Tyrosine	Amino Acid And Derivatives	NEG	261.168	C9H12NO6P	0.94	18910	14260	15380	11190	11280	14480	16690	20860	13480	19030	19020	20300	21030	18440	23560	6948	9611	17150	12260	14480	10060	19040	20150	12440	13570	21290	13810	16000	4958	20680	12790	14740	21150	12170	-	HMDB0006049	-	-	-	-
Com_167_neg	L-Sorbose	Carbohydrates And Its Derivatives	NEG	180.16	C6H12O6	0.89	255800	256000	298100	619700	381200	217900	469200	409200	501300	394900	397600	288600	565100	252500	435900	210200	132900	218200	255700	222800	266400	312100	442700	475900	263700	235400	241100	289200	263200	234900	336300	287200	351100	229900	470-15-5	HMDB0001266	C00247	ko01100//Metabolic pathways;ko00051//Fructose and mannose metabolism	Carbohydrate metabolism;Global and overview maps	Metabolism
Com_168_neg	Sodium ferulate	Cinnamic acids and derivatives	NEG	216.17	C10H9NaO4	6.81	311600	364200	333600	143200	175000	192000	160700	158700	160400	192700	203900	279100	267400	206300	253700	483000	605100	419900	168600	227500	203600	153000	226700	204100	323900	330700	326700	107100	150400	134600	242600	214200	253800	239600	-	HMDB0303721	-	-	-	-
Com_169_neg	O-Phosphorylethanolamine	Organic Acid And Its Derivatives	NEG	141.063	C2H8NO4P	0.86	399200	377800	408100	443600	432300	402300	588700	565100	461500	345400	325000	426300	606100	566300	267700	224300	233200	230800	402200	369900	371500	449800	668300	462000	465800	490500	623600	676000	571300	618400	489800	471600	526000	515400	1071-23-4	HMDB0000224	C00346	ko01100//Metabolic pathways;ko00564//Glycerophospholipid metabolism;ko00600//Sphingolipid metabolism;ko00563//Glycosylphosphatidylinositol (GPI)-anchor biosynthesis	Global and overview maps;Glycan biosynthesis and metabolism;Lipid metabolism	Metabolism
Com_170_neg	Isotrifoliin	Flavonoids	NEG	464.096	C21H20O12	6.59	1389000	1590000	1175000	768100	791700	954900	626600	814500	745900	802700	844400	1256000	677700	341600	459700	29980	34370	37730	79140	97750	75370	46490	71330	87530	41710	19710	47010	126800	135900	213000	404800	483100	423900	451700	-	HMDB0247252	C05623	ko01100//Metabolic pathways;ko01110//Biosynthesis of secondary metabolites;ko00944//Flavone and flavonol biosynthesis	Biosynthesis of other secondary metabolites;Global and overview maps	Metabolism
Com_171_neg	alpha-D-Galactose 1-phosphate	Carbohydrates And Its Derivatives	NEG	260.136	C6H13O9P	0.87	6749000	5701000	6312000	4439000	4237000	4398000	6861000	6026000	5694000	5700000	5010000	6320000	6784000	4961000	3563000	4469000	4816000	4160000	4395000	3757000	3533000	4727000	8801000	6413000	4120000	4922000	4746000	3153000	4225000	4202000	5068000	5062000	4679000	5113000	2255-14-3	HMDB0000645	C00446	ko01100//Metabolic pathways;ko00052//Galactose metabolism;ko00520//Amino sugar and nucleotide sugar metabolism	Carbohydrate metabolism;Global and overview maps	Metabolism
Com_172_neg	Cytidylic acid	Nucleotide And Its Derivates	NEG	323.2	C9H14N3O8P	0.97	42600	17040	44650	20810	28810	22360	35970	37210	28370	21420	31980	53900	28190	42040	43110	31570	43930	52920	31140	19840	29480	38130	36440	18100	77210	77310	108400	48910	46100	60220	39600	40000	35170	38790	84-52-6	HMDB0240312	C00055	ko01100//Metabolic pathways;ko00240//Pyrimidine metabolism	Global and overview maps;Nucleotide metabolism	Metabolism
Com_173_neg	2-Amino-3-hydroxypropionic acid	Amino Acid And Derivatives	NEG	105.09	C3H7NO3	0.83	4100000	4129000	3920000	2232000	2370000	2709000	2328000	2648000	2400000	1370000	1442000	1901000	1721000	2000000	1830000	4330000	3884000	3663000	2590000	2806000	2658000	3328000	3118000	3587000	2166000	1972000	1882000	1749000	1884000	2000000	2312000	2164000	2296000	2375000	--	--	-	-	-	-
Com_174_neg	3-O-Feruloylquinic acid	Alcohols and polyols	NEG	368.335	C17H20O9	5.55	629700	894300	645700	1614000	1777000	2192000	928500	1218000	899000	739400	690500	1429000	2191000	2198000	2143000	1923000	1960000	1712000	4606000	5355000	4639000	3665000	4969000	3747000	5131000	5927000	6503000	3596000	4096000	4219000	2598000	2507000	2587000	2393000	62929-69-5	HMDB0030669	-	-	-	-
Com_175_neg	Warfarin Sodium	Coumarins and derivatives	NEG	330.31	C19H15O4	5.56	1992000	2152000	1975000	1843000	2188000	1954000	2239000	2130000	2185000	2193000	1884000	1909000	1634000	1094000	1300000	173100	204300	179100	242700	294600	248600	198600	244600	205800	318300	307400	370200	245800	258100	283800	1547000	1498000	1321000	1351000	81-81-2	HMDB0001935	-	-	-	-
Com_176_neg	13(S)-HOTrE	Fatty Acyls	NEG	294.2	C18H30O3	12.07	140300	296800	188600	164600	161500	178300	110300	128200	133700	122200	115500	214900	199400	136300	235500	155300	176200	118000	405100	460100	388900	253400	413800	259700	262800	214800	212300	134500	144300	158700	206400	184000	181300	189800	--	--	C16316	ko00592//alpha-Linolenic acid metabolism	Lipid metabolism	Metabolism
Com_177_neg	Ligustrazine	Alkaloids and derivatives	NEG	136.197	C8H12N2	0.88	217300	270500	186100	231500	242700	226900	237600	323000	202400	274200	262000	274400	211100	217300	192900	265800	257300	243100	282500	212300	298300	276200	279120	300000	210300	270300	284700	282900	225100	246600	289600	310500	287900	266300	1124-11-4	HMDB0036584	-	-	-	-
Com_178_neg	Echinacoside	Polyphenol	NEG	786.73	C35H46O20	5.89	172000	236300	128700	252500	225400	311400	115200	141800	97950	77780	41920	156500	114900	85100	51490	8051	11970	4951	115600	112000	162200	83580	193900	169100	9130	12970	16090	75340	103700	142800	102400	105400	107100	105300	-	HMDB0251686	-	-	-	-
Com_179_neg	Arbutin	Carbohydrates And Its Derivatives	NEG	272.25	C12H16O7	2.32	25270	30890	25160	33150	32370	33040	34450	34570	34440	36790	29180	46000	58440	38250	42150	18050	17460	19320	28340	31760	27670	27590	48500	38400	29110	30150	34090	31300	40420	38040	29240	30110	35310	30690	497-76-7	HMDB0029943	C06186	ko00010//Glycolysis / Gluconeogenesis	Carbohydrate metabolism	Metabolism
Com_180_neg	Esculin	Coumarins and derivatives	NEG	340.28	C15H16O9	5.145	971200	982700	635000	1282000	1165000	1147000	495100	505000	455200	311700	260200	492900	787700	632100	463600	392400	373200	430700	441900	513600	344100	284500	513300	353400	390800	500100	698900	674400	546000	663200	545800	570300	595500	595700	531-75-9	HMDB0030820	-	-	-	-
Com_181_neg	Crocetin	Terpenoids	NEG	328.408	C20H24O4	8.79	141400	195500	122600	116000	128300	117400	100600	112900	109600	111000	98500	180600	141800	104000	148600	111100	118500	99680	161100	170400	172300	156900	331600	175900	154600	133300	163300	78550	72220	105800	124300	116700	137000	122600	-	HMDB0250540	C08588	ko01100//Metabolic pathways;ko01110//Biosynthesis of secondary metabolites	Global and overview maps	Metabolism
Com_182_neg	8-Gingerol	Catechin derivatives	NEG	868.702	C43H32O20	1.13	22770	22100	18210	10480	11000	18820	21540	25310	10500	17880	6904	16550	18930	6497	16020	9606	12820	17180	14420	16270	8673	15390	13590	9760	5218	12970	11130	6990	11833	17370	20470	8088	11730	6800	--	--	-	-	-	-
Com_183_neg	Isochlorogenic acid A	Alcohols and polyols	NEG	516.451	C25H24O12	6.912	75810	68140	50480	86350	96140	110200	52760	55780	74730	49340	41280	93040	174000	122400	122000	130900	147300	120300	214500	183500	150700	113400	181200	135300	318300	297000	364700	121500	132400	144800	155700	113000	127800	97450	-	HMDB0029280	-	-	-	-
Com_184_neg	alpha,alpha-Trehalose	Carbohydrates And Its Derivatives	NEG	342.296	C12H22O11	0.962	8453000	7301000	6475000	13190000	14250000	13250000	8779000	11660000	7569000	7061000	4771000	8568000	10620000	10610000	8111000	3131000	2633000	3141000	13560000	11720000	10550000	11410000	16940000	10470000	6571000	6835000	10860000	8615000	10280000	11270000	8781000	9450000	9466000	9615000	99-20-7	HMDB0000975	C01083	ko01100//Metabolic pathways;ko01110//Biosynthesis of secondary metabolites;ko02010//ABC transporters;ko00500//Starch and sucrose metabolism	Carbohydrate metabolism;Global and overview maps;Membrane transport	Environmental Information Processing;Metabolism
Com_185_neg	Oenin chloride	Anthocyanins	NEG	528.89	C23H25ClO12	5.572	6695	5563	4707	5666	4143	6425	5493	5822	4798	3658	6017	2342	8156	2595	3497	6084	7687	11720	5625	13380	7750	12420	13740	13490	8006	7418	19670	18450	14590	12720	9770	7736	3865	5630	--	--	-	-	-	-
Com_186_neg	Peonidin chloride	Anthocyanins	NEG	336.72	C16H13ClO6	11.419	78250	73960	80940	79220	81790	71070	85380	81300	84550	85590	93850	85510	73810	89010	78140	97140	71000	83210	86050	85890	98230	74740	82420	83030	76510	81580	71460	82810	90300	79090	88610	81670	84790	88530	--	--	-	-	-	-
Com_187_neg	Daphnetin	Coumarins and derivatives	NEG	178.14	C9H6O4	6.126	37780	56830	20830	13240	34520	17480	9790	17850	30510	17340	10450	24050	38520	11650	11920	19460	56370	48700	8466	27030	22390	16270	16520	15070	12080	5225	27840	8071	18220	14270	14580	19100	13300	23090	--	--	-	-	-	-
Com_188_neg	Methylmalonate	Organic Acid And Its Derivatives	NEG	118.09	C4H6O4	1.938	1213000	1635000	1458000	1729000	2156000	2281000	1548000	1778000	1628000	1509000	1368000	1852000	2968000	1938000	2403000	989100	941200	919200	2697000	2847000	2518000	1820000	3496000	2390000	1994000	2269000	2106000	1306000	1537000	1531000	1907000	1827000	1900000	1834000	516-05-2	HMDB0000202	C02170	ko01100//Metabolic pathways;ko00240//Pyrimidine metabolism;ko00640//Propanoate metabolism;ko00280//Valine, leucine and isoleucine degradation	Amino acid metabolism;Carbohydrate metabolism;Global and overview maps;Nucleotide metabolism	Metabolism
Com_189_neg	Carvacrol	Terpenoids	NEG	150.22	C10H14O	1.467	7820	11360	10120	9247	5636	10850	7597	13540	8647	6108	8876	6513	10400	13440	15620	8884	7330	6258	7099	8727	11480	9315	10389	13720	11510	6665	5277	10510	7240	9666	6927	9270	8468	7637	114567-47-4	HMDB0038707	-	-	-	-
Com_190_neg	Tiglic acid	Fatty Acyls	NEG	100.12	C5H8O2	18.476	1792000	1660000	1542000	1631000	1592000	1602000	1830000	1538000	1842000	1728000	1559000	1629000	1561000	1587000	1768000	1813000	1920000	1562000	1589000	1869000	1930000	1942000	1939000	1713000	2098000	2008000	1890000	2052000	2059000	1982000	2125000	1807000	1622000	1679000	80-59-1	HMDB0001470	-	-	-	-
Com_191_neg	Dihydrodehydrodiconiferyl Alcohol	Phenylpropanoids and polyketides	NEG	360.401	C20H24O6	0.77	7734	7345	6228	5738	5193	6351	7028	6330	5860	7226	4922	13670	10170	5873	4840	7009	5126	5362	6089	6786	6600	4637	13930	10190	5628	3354	6903	9387	5160	3734	7461	4506	4089	4632	--	--	-	-	-	-
Com_192_neg	D-2-Hydroxypentanedioic acid	Amino Acid And Derivatives	NEG	192.078	C5H6Na2O5	1.49	597655	661820	562053	566420	238600	417000	549100	532800	458600	535200	420100	712900	1727000	1000000	1394000	518500	195400	548930	351700	393600	508300	530500	1111000	959300	634100	957500	1126000	961800	1408000	1452000	585000	750600	591700	565700	--	--	-	-	-	-
Com_193_neg	D-3-Phosphoglyceric acid	Sugar Acids And Its Derivatives	NEG	230.021	C3H5H2O7P	0.95	1728000	2455000	1656000	1221000	1025000	1534000	1139000	1500000	2282000	4397000	2018000	3439000	4752000	2844000	15610000	1058000	1052000	1048000	1015000	857800	914900	1305000	2396000	1424000	1120000	1336000	1627000	718400	2543000	1426000	1689000	1762000	1542000	1670000	3443-58-1	HMDB0060180	C00197	ko01100//Metabolic pathways;ko01110//Biosynthesis of secondary metabolites;ko01120//Microbial metabolism in diverse environments;ko01230//Biosynthesis of amino acids;ko01200//Carbon metabolism;ko00270//Cysteine and methionine metabolism;ko00260//Glycine, serine and threonine metabolism;ko00630//Glyoxylate and dicarboxylate metabolism;ko00030//Pentose phosphate pathway;ko00710//Carbon fixation in …	Amino acid metabolism;Carbohydrate metabolism;Energy metabolism;Global and overview maps;Lipid metabolism	Metabolism
Com_194_neg	D-Mannose 6-phosphate	Carbohydrates And Its Derivatives	NEG	260.136	C6H13O9P	0.87	697500	662300	588400	518100	459800	454200	733400	588000	670500	441400	424400	567700	721500	526400	224900	549800	619500	548500	426800	391800	506200	546100	878100	603300	363600	399500	417600	391500	476400	450400	547300	526800	540200	533700	-	HMDB0304312	C00275	ko01100//Metabolic pathways;ko01110//Biosynthesis of secondary metabolites;ko00520//Amino sugar and nucleotide sugar metabolism;ko00051//Fructose and mannose metabolism	Carbohydrate metabolism;Global and overview maps	Metabolism
Com_195_neg	2–furanoic acid	Organic Acid And Its Derivatives	NEG	112.084	C5H4O3	1.49	240100	368100	229000	653300	650300	912200	1199000	1197000	970600	1244000	1339000	1490000	4261000	2174000	3102000	425800	473100	356000	835200	771700	1120000	1420000	2697000	2191000	1688000	2360000	2275000	2076000	2959000	3313000	1363000	2013000	1206000	1372000	--	--	-	-	-	-
Com_196_neg	4-p-Coumaroylquinic acid	Cinnamic acids and derivatives	NEG	338.309	C16H18O8	5.45	638900	812100	588700	344200	400100	563000	436900	496900	478900	583600	516600	934100	848400	565200	641600	430600	472100	364800	419600	537200	365800	474800	736500	480200	579100	696700	736800	182300	222400	253100	543000	496500	492000	493900	93451-44-6	HMDB0301710	-	-	-	-
Com_197_neg	Lactose	Carbohydrates And Its Derivatives	NEG	342.3	C12H22O11	0.911	535600	501600	495300	884400	969600	808400	548700	788800	564000	448000	352100	515800	702200	620800	487200	277000	221100	233400	807100	740600	698300	682600	1095000	643700	435500	484100	593700	540200	690500	722900	596600	573500	588500	628400	5965-66-2	HMDB0041627	C00243	ko01100//Metabolic pathways;ko02010//ABC transporters;ko00052//Galactose metabolism	Carbohydrate metabolism;Global and overview maps;Membrane transport	Environmental Information Processing;Metabolism
Com_198_neg	alpha-D-Glucose	Carbohydrates And Its Derivatives	NEG	180.16	C6H12O6	0.912	476800	384000	493200	666900	522200	465900	685100	707700	1215000	460600	575100	602400	823200	798700	553100	443200	424900	393500	371000	647300	802200	792800	1117000	579900	350300	454900	334800	643900	516500	557300	525500	547900	877900	727800	492-62-6	HMDB0003345	C00267	ko01100//Metabolic pathways;ko01110//Biosynthesis of secondary metabolites;ko01120//Microbial metabolism in diverse environments;ko01200//Carbon metabolism;ko00052//Galactose metabolism;ko00520//Amino sugar and nucleotide sugar metabolism;ko00010//Glycolysis / Gluconeogenesis;ko00051//Fructose and mannose metabolism	Carbohydrate metabolism;Global and overview maps	Metabolism
Com_199_neg	L-Arabinitol	Sugar Alcohols	NEG	152.15	C5H12O5	0.925	63830	75910	70460	57080	51680	43060	33250	50140	41210	48100	30060	53890	64770	59410	79110	48030	45100	46140	30720	41450	39340	33490	37180	31460	64980	64820	69060	43300	39860	41480	48490	45520	46290	47340	7643-75-6	HMDB0001851	C00532	ko01100//Metabolic pathways;ko00040//Pentose and glucuronate interconversions	Carbohydrate metabolism;Global and overview maps	Metabolism
Com_200_neg	L-Pyroglutamic acid	Amino Acid And Derivatives	NEG	129.11	C5H7NO3	1.689	175700	171100	124000	16120	15450	13490	15490	16630	26060	36480	21850	34760	187300	166000	182900	346300	321500	293100	17500	28720	33670	24450	58280	49010	85750	116100	111800	168400	149300	169000	92080	96300	87070	116300	98-79-3	HMDB0000267	C01879	ko01100//Metabolic pathways;ko00480//Glutathione metabolism	Global and overview maps;Metabolism of other amino acids	Metabolism
Com_201_neg	Lactobionic acid	Carbohydrates And Its Derivatives	NEG	358.3	C12H22O12	0.91	41500	34680	39790	56290	42360	52420	50130	55900	47890	44450	41360	60670	105100	76890	79940	42160	33140	32030	51500	38440	45950	56820	70820	59800	45700	61470	96450	68440	80460	94900	36120	61320	44680	48720	-	HMDB0253945	-	-	-	-
Com_202_neg	Citric acid	Tca Cycle	NEG	192.12	C6H8O7	1.516	2425000	4138000	2490000	9524000	7001000	8710000	12450000	11260000	10430000	12760000	13980000	15330000	43890000	25140000	33310000	3540000	4793000	3490000	9585000	9324000	11690000	13660000	29370000	20700000	19020000	20220000	24990000	22720000	31180000	32450000	12460000	21930000	14440000	14280000	77-92-9	HMDB0000094	C00158	ko01100//Metabolic pathways;ko01110//Biosynthesis of secondary metabolites;ko01120//Microbial metabolism in diverse environments;ko01230//Biosynthesis of amino acids;ko01200//Carbon metabolism;ko01210//2-Oxocarboxylic acid metabolism;ko00630//Glyoxylate and dicarboxylate metabolism;ko00250//Alanine, aspartate and glutamate metabolism;ko00020//Citrate cycle (TCA cycle)	Amino acid metabolism;Carbohydrate metabolism;Global and overview maps	Metabolism
Com_203_neg	Cytosine	Nucleotide And Its Derivates	NEG	111.1	C4H5N3O	0.875	12140	19700	9689	10890	21770	11480	16280	6722	12750	30220	24910	50220	27650	14690	17540	27580	31550	24070	18600	20080	27600	53270	36640	36240	38820	69600	61910	29110	22260	59080	36060	50680	33870	20960	71-30-7	HMDB0000630	C00380	ko01100//Metabolic pathways;ko00240//Pyrimidine metabolism	Global and overview maps;Nucleotide metabolism	Metabolism
Com_204_neg	cis-Aconitic acid	Tca Cycle	NEG	174.11	C6H6O6	1.766	2524000	3107000	2713000	2722530	2353000	2772380	3027000	2859000	3088000	4672000	3140000	4118000	9428000	5040000	7586000	2794000	2530000	2342000	2426000	1263000	2754000	3469000	4901000	4893000	2336000	4370000	4494000	5320000	5912000	6849000	4105000	4406000	4068000	2117000	585-84-2	HMDB0000072	C00417	ko01100//Metabolic pathways;ko01110//Biosynthesis of secondary metabolites;ko01120//Microbial metabolism in diverse environments;ko01210//2-Oxocarboxylic acid metabolism;ko00630//Glyoxylate and dicarboxylate metabolism;ko00020//Citrate cycle (TCA cycle);ko00660//C5-Branched dibasic acid metabolism	Carbohydrate metabolism;Global and overview maps	Metabolism
Com_205_neg	Thymidine 5'-diphosphate	Nucleotide And Its Derivates	NEG	402.19	C10H16N2O11P2	0.69	4876	12200	5426	5061	11140	11030	11750	5538	5805	10820	4942	17780	14510	12140	17990	8509	6590	9372	7325	13750	11910	5043	13710	12590	7681	6340	8997	11320	15410	13900	7850	9437	15560	11640	491-97-4	HMDB0001274	C00363	ko01100//Metabolic pathways;ko00240//Pyrimidine metabolism	Global and overview maps;Nucleotide metabolism	Metabolism
Com_206_neg	N-Acetylphenylalanine	Amino Acid And Derivatives	NEG	207.226	C11H13NO3	6.82	17450	24560	12640	19580	25030	26600	29150	45640	26570	165900	86100	175100	1089000	743300	935000	16970	27390	17440	46270	34960	43190	73310	130500	82100	521900	659200	946800	512700	605700	568300	228800	266800	233300	246600	-	HMDB0255056	-	-	-	-
Com_207_neg	N-Acetyl-D-glucosamine 6-phosphate	Carbohydrates And Its Derivatives	NEG	301.188	C8H16NO9P	1.81	26890	50850	29860	99060	118000	114200	200100	211400	213900	216400	157300	240700	250600	228600	265800	38040	47440	30230	124100	148100	127800	291100	371400	332100	338000	385000	437100	381300	424800	396000	247100	214800	217500	188000	73495-11-1	HMDB0002817	C00357	ko01100//Metabolic pathways;ko00520//Amino sugar and nucleotide sugar metabolism	Carbohydrate metabolism;Global and overview maps	Metabolism
Com_208_neg	2'-Hydroxydaidzein	Isoflavonoids	NEG	270.053	C15H10O5	7.24	9237	11490	10990	7515	8488	7774	8720	8416	7829	3629	3183	19620	7247	5262	6890	13320	13720	13490	12420	6502	11750	18170	20390	15730	9153	23320	25630	9852	12650	15010	8266	5799	13270	11020	7678-85-5	HMDB0029372	C02495	ko01110//Biosynthesis of secondary metabolites;ko00943//Isoflavonoid biosynthesis	Biosynthesis of other secondary metabolites;Global and overview maps	Metabolism
Com_209_neg	D-Ribose 5-phosphate	Pentose phosphates	NEG	230.11	C5H11O8P	0.89	647300	639700	581900	465700	411300	475100	520000	686500	517300	591800	901700	861500	975300	1193000	738200	699500	704600	637100	437900	380500	436900	500800	680600	581500	752800	671100	805900	792700	705900	1165000	597100	721200	637700	696400	34980-65-9	HMDB0001548	C00117	ko01100//Metabolic pathways;ko01110//Biosynthesis of secondary metabolites;ko01120//Microbial metabolism in diverse environments;ko01230//Biosynthesis of amino acids;ko01200//Carbon metabolism;ko00230//Purine metabolism;ko00030//Pentose phosphate pathway;ko00710//Carbon fixation in photosynthetic organisms;ko00750//Vitamin B6 metabolism	Carbohydrate metabolism;Energy metabolism;Global and overview maps;Metabolism of cofactors and vitamins;Nucleotide metabolism	Metabolism
Com_210_neg	Trifolin	Flavonoids	NEG	448.101	C21H20O11	6.62	2541000	2373000	1911000	1305000	1232000	1408000	715100	778600	1017000	891800	819200	1325000	990000	605700	325300	1513000	1927000	1303000	2415000	3661000	2824000	1326000	1926000	1718000	2060000	1813000	2266000	1033000	1484000	1488000	1532000	1442000	1611000	1400000	-	HMDB0304745	C12626	ko01110//Biosynthesis of secondary metabolites;ko00944//Flavone and flavonol biosynthesis	Biosynthesis of other secondary metabolites;Global and overview maps	Metabolism
Com_211_neg	Acetylharpagide	Terpenoids	NEG	406.38	C17H26O11	5.783	13400	13240	6906	20850	19580	23500	13560	13610	8175	9007	6270	14700	16420	13350	11620	10230	12130	9096	14520	16020	16380	14330	22070	17170	20240	22270	33080	10100	6995	14450	8971	15750	7702	15290	--	--	-	-	-	-
Com_212_neg	Uridine 5'-monophosphate	Nucleotide And Its Derivates	NEG	324.18	C9H13N2O9P	1.037	298600	183500	328200	131600	146100	157500	192400	266400	211000	225600	211600	310800	242900	224600	192600	454600	273900	408400	107100	288000	183700	243400	162900	142400	590300	603600	765800	280200	333000	334100	176500	213400	253900	199100	58-97-9	HMDB0000288	C00105	ko01100//Metabolic pathways;ko00240//Pyrimidine metabolism	Global and overview maps;Nucleotide metabolism	Metabolism
Com_213_neg	Sibiricose A5	Phenylpropanoids	NEG	518.465	C22H30O14	5.421	31160	34090	12040	22970	28920	31920	18290	21130	20610	26850	29640	50150	53090	45360	42180	31480	32120	27510	31820	42500	42160	61240	68610	76260	55560	45330	58820	29960	50940	38660	31550	38310	30930	38910	--	--	-	-	-	-
Com_214_neg	D-Glucopyranose	Carbohydrates And Its Derivatives	NEG	180.156	C6H12O6	0.87	239000	299600	245100	305400	315800	275600	330800	346000	279900	320900	265200	309300	462500	320200	457400	205600	212700	197900	286300	220500	286900	354400	391300	420700	200700	256400	290600	232600	265300	314000	246400	286500	306400	302900	-	HMDB0304632	C00031	ko01100//Metabolic pathways;ko01110//Biosynthesis of secondary metabolites;ko02010//ABC transporters;ko00052//Galactose metabolism;ko00520//Amino sugar and nucleotide sugar metabolism;ko00030//Pentose phosphate pathway;ko00010//Glycolysis / Gluconeogenesis;ko00500//Starch and sucrose metabolism;ko00901//Indole alkaloid biosynthesis;ko04931//Insulin resistance;ko04933//AGE-RAGE signaling pathway i…	Biosynthesis of other secondary metabolites;Carbohydrate metabolism;Endocrine and metabolic disease;Global and overview maps;Membrane transport	Environmental Information Processing;Human Diseases;Metabolism
Com_215_neg	D-Histidine	Amino Acid And Derivatives	NEG	155.155	C6H9N3O2	0.81	162000	235600	147900	622600	782100	748000	800800	953000	828300	1646000	1288000	1888000	2528000	1939000	2016000	133300	135900	116400	469100	522500	449700	620300	916100	840200	1970000	2626000	2652000	1726000	1993000	1912000	1267000	987900	1181000	1257000	-	HMDB0250763	C06419	ko01100//Metabolic pathways	Global and overview maps	Metabolism
Com_216_neg	D-Glucarate	Carbohydrates And Its Derivatives	NEG	210.139	C6H10O8	0.82	28240	32240	30670	20250	23940	35790	31490	30097	38150	28908	28820	35660	29010	27314	46809	31730	29200	28210	30160	32420	48370	38000	27310	38720	25420	33160	44630	52840	27080	36240	36230	25050	27730	26130	87-73-0	HMDB0000663	C00818	ko01100//Metabolic pathways;ko00053//Ascorbate and aldarate metabolism	Carbohydrate metabolism;Global and overview maps	Metabolism
Com_217_neg	D-Gluconic acid	Carbohydrates And Its Derivatives	NEG	196.155	C6H12O7	0.91	5194000	4835000	3595000	5351000	4485000	5077000	4130000	6006000	3549000	6730000	4907000	7233000	11560000	10890000	12070000	4977000	5226000	4236000	5323000	4835000	5012000	5088000	7669000	5409000	8926000	8697000	9330000	6749000	6853000	6916000	6507000	6107000	6348000	6053000	-	HMDB0303730	C00257	ko01100//Metabolic pathways;ko01110//Biosynthesis of secondary metabolites;ko01120//Microbial metabolism in diverse environments;ko01200//Carbon metabolism;ko00030//Pentose phosphate pathway	Carbohydrate metabolism;Global and overview maps	Metabolism
Com_218_neg	Aspartate	Amino Acid And Derivatives	NEG	133.103	C4H7NO4	0.85	41920000	36510000	33120000	33840000	37070000	38960000	28570000	34260000	33000000	38000000	34540000	42830000	42260000	39740000	36300000	50320000	49000000	43380000	36830000	36350000	30580000	33780000	42210000	32010000	43000000	44000000	45120000	30030000	31200000	36260000	39200000	41870000	43260000	39880000	56-84-8	HMDB0000191	-	-	-	-
Com_219_neg	Dl-Glutamic acid	Amino Acid And Derivatives	NEG	147.129	C5H9NO4	0.87	5370000	4271000	4122000	1501000	1499000	1656000	1867000	1688000	1730000	1433000	1507000	1516000	1984000	1790000	1538000	4513000	4516000	4333000	1538000	1761000	1632000	2117000	1887000	1801000	1204000	1427000	1478000	1453000	1410000	1532000	2214000	2230000	2275000	2324000	-	HMDB0060475	C00302	ko01100//Metabolic pathways;ko00460//Cyanoamino acid metabolism	Global and overview maps;Metabolism of other amino acids	Metabolism
Com_220_neg	Dihydroxyacetone phosphate	Carbohydrates And Its Derivatives	NEG	170.058	C3H7O6P	0.9	94210	112900	111700	84640	80840	108700	101500	123600	109100	101400	81200	81970	111800	100700	199000	103000	62240	69050	101400	78200	97740	94760	94050	92610	92350	101400	69410	70320	73690	89780	95310	86240	94470	95430	1957-04-05	HMDB0001473	C00111	ko01100//Metabolic pathways;ko01110//Biosynthesis of secondary metabolites;ko01120//Microbial metabolism in diverse environments;ko01230//Biosynthesis of amino acids;ko01200//Carbon metabolism;ko00052//Galactose metabolism;ko00710//Carbon fixation in photosynthetic organisms;ko00760//Nicotinate and nicotinamide metabolism;ko00010//Glycolysis / Gluconeogenesis;ko00040//Pentose and glucuronate inte…	Carbohydrate metabolism;Energy metabolism;Global and overview maps;Lipid metabolism;Metabolism of cofactors and vitamins	Metabolism
Com_221_neg	D-Lactic acid	Organic Acid And Its Derivatives	NEG	90.08	C3H6O3	1.44	14700	16150	15030	10690	5445	8286	17380	11810	5365	4949	5271	11320	16840	19010	17620	10030	11000	7522	8419	10660	18590	4664	13740	6337	8098	15000	11570	29020	14590	16790	15670	20070	16360	13630	10326-41-7	HMDB0001311	C00256	ko01100//Metabolic pathways;ko01120//Microbial metabolism in diverse environments;ko00620//Pyruvate metabolism;ko01502//Vancomycin resistance	Carbohydrate metabolism;Drug resistance: antimicrobial;Global and overview maps	Human Diseases;Metabolism
Com_222_neg	DL-o-Tyrosine	Amino Acid And Derivatives	NEG	181.189	C9H11NO3	1.81	330000	503900	343900	1276000	1548000	1688000	2677000	3221000	2806000	3365000	2783000	4192000	5768000	4579000	5122000	467000	574500	402800	1479000	1790000	1620000	4187000	5868000	4695000	5866000	6654000	8074000	4947000	5978000	6206000	3092000	3269000	3161000	3169000	2370-61-8	HMDB0006050	-	-	-	-
Com_223_neg	alpha-Amino-beta-(3-indolyl)-propionic acid	Amino Acid And Derivatives	NEG	204.225	C11H12N2O2	4.91	87860	130200	87050	637900	798000	786800	1416000	1755000	1446000	4046000	3172000	5202000	8186000	5848000	7175000	52270	71290	45470	570800	677900	624400	2183000	3089000	2246000	8110000	9400000	9435000	5216000	5780000	6049000	2591000	2485000	2841000	3080000	1954-12-06	HMDB0030396	-	-	-	-
Com_224_neg	Cryptochlorogenic acid	Alcohols and polyols	NEG	354.309	C16H18O9	5.443	53630000	59180000	49980000	27750000	29150000	50810000	35760000	41610000	40350000	37230000	32800000	40340000	28020000	18160000	18720000	4342000	4218000	3382000	3347000	4497000	4032000	3048000	4389000	3456000	5609000	6034000	7670000	4074000	4417000	4945000	22210000	21930000	18050000	18990000	905-99-7	HMDB0030653	-	-	-	-
Com_225_neg	D-Fructose-1,6-biphosphate	Carbohydrates And Its Derivatives	NEG	339.996	C6H14O12P2	0.91	901400	751800	857000	647800	822000	733500	673100	696300	560600	947200	864900	1136000	494900	444500	694900	678100	1045000	836500	631000	641900	612500	675800	793200	851300	914000	552500	899100	455700	553300	468500	893800	843100	739200	800700	--	--	-	-	-	-
Com_226_neg	2,3-Dihydroxybenzoic acid	Benzoic acids and derivatives	NEG	154.027	C7H6O4	6.21	69330	74230	67650	103300	90070	63790	50350	105400	50690	54930	66470	85820	189100	186700	220400	66080	54400	82650	97940	174700	215300	135100	208800	144200	195700	152600	132800	575000	583300	648600	150100	163500	161000	147800	303-38-8	HMDB0000397	C00196	ko01110//Biosynthesis of secondary metabolites;ko01120//Microbial metabolism in diverse environments	Global and overview maps	Metabolism
Com_227_neg	Aminomalonic acid	Amino Acid And Derivatives	NEG	119.022	C3H5NO4	0.88	422000	358700	322400	482500	486900	488600	505700	615800	621800	416300	428900	473500	571200	686600	593900	391800	433700	391500	485400	448300	423400	681100	704000	528600	544000	507800	520600	467700	478700	482100	462800	459100	455300	502900	1068-84-4	HMDB0001147	-	-	-	-
Com_228_neg	Methylophiopogonanone A	Flavonoids	NEG	342.343	C19H18O6	0.78	89160	104700	68950	76040	101700	86240	54560	88850	51040	114300	83250	135100	106600	83950	106600	140800	144400	148800	71010	75590	56310	33170	76640	46510	118900	133000	109300	80860	107500	140100	103600	103500	102300	96800	--	--	-	-	-	-
Com_229_neg	3-Hydroxy-3-methyl butyric acid	Organic Acid And Its Derivatives	NEG	118.063	C5H10O3	0.97	32730	46290	30640	31640	25960	34290	47220	57210	43990	40910	20650	51660	54270	42050	48420	45010	34470	34460	42410	37100	41300	43360	76440	60710	40550	39060	58090	26260	24910	29870	32340	41750	29980	29820	--	--	-	-	-	-
Com_230_neg	Quercetin	Flavones and Flavonols	NEG	302.236	C15H10O7	8.96	14880	19590	14000	5225	7691	6305	7005	7950	4198	8490	5388	3770	3730	10430	6874	11820	10340	8293	8757	3896	9663	6030	9539	5047	4609	4704	4673	8477	9758	7581	6499	6737	9854	9195	117-39-5	HMDB0005794	C00389	ko01100//Metabolic pathways;ko01110//Biosynthesis of secondary metabolites;ko00944//Flavone and flavonol biosynthesis;ko00941//Flavonoid biosynthesis	Biosynthesis of other secondary metabolites;Global and overview maps	Metabolism
Com_231_neg	Quercetin-3'-O-glucoside	Flavones and Flavonols	NEG	464.382	C21H20O12	6.53	708900	790800	562500	354300	324300	561700	264000	345100	297300	391800	377400	631800	420100	202900	201100	17140	20150	10340	19010	44860	26750	17070	42000	30990	14500	20590	22150	49450	72340	69870	171300	236900	205800	235800	--	--	-	-	-	-
Com_232_neg	Cellotriose	Carbohydrates And Its Derivatives	NEG	504.437	C18H32O16	1.02	91110	152000	126500	193400	154000	215400	278100	268100	340900	152500	113800	154900	377400	247300	190200	112000	92270	128700	133800	115900	138700	319400	477700	453800	114600	95390	112200	154300	205600	215900	178600	186800	191400	219200	--	--	-	-	-	-
Com_233_neg	Syringic acid O-glucoside	Flavonoids	NEG	360.1	C15H20O10	4.82	113600	164900	94810	249600	257200	253100	204600	213400	167000	232200	183300	287400	427500	202100	307100	56210	56860	51330	92010	89760	81130	81550	140600	98040	90180	113000	130400	160700	188100	201400	162000	141800	143300	164100	--	--	-	-	-	-
Com_234_neg	N-p-Coumaroyl hydroxydehydroagmatine	Coumarins and derivatives	NEG	290.3	C14H18N4O3	5.35	4067	2577	3066	4649	4505	4885	4022	6104	5100	3040	4443	8902	8555	5017	3582	5807	4578	6448	7500	14940	11250	7445	17580	14670	9446	6881	11700	6365	3364	3461	5062	6641	9046	6451	--	--	-	-	-	-
Com_235_neg	Di-O-methylquercetin	Flavonoids	NEG	330.1	C17H14O7	9.19	1652000	2259000	1579000	1445000	1614000	1669000	1342000	1630000	1422000	939700	808400	1399000	1528000	1073000	1357000	1062000	1142000	914800	1377000	1619000	1659000	1529000	2961000	2034000	902800	874600	990700	832700	972100	1107000	1271000	1364000	1283000	1284000	--	--	-	-	-	-
Com_236_neg	Salicylic acid O-glucoside	Phytohormones	NEG	300.1	C13H16O8	4.14	1221000	1531000	1105000	857300	967700	1160000	1007000	1197000	1085000	1250000	1037000	1596000	2256000	1440000	1834000	1635000	1702000	1294000	1721000	1845000	1707000	2043000	3370000	2390000	1929000	2182000	2502000	1506000	1678000	1858000	1545000	1529000	1639000	1538000	--	--	-	-	-	-
Com_237_neg	3,4,5-Trimethoxycinnamic acid	Organic Acid And Its Derivatives	NEG	238.24	C12H14O5	18.465	2006	3722	3072	2325	2604	2648	2253	2915	2689	2624	2398	2494	2583	2562	2430	2724	2400	4654	4834	2555	2040	1821	5086	1838	2766	2241	1975	3179	2322	4674	2711	2806	2950	2420	90-50-6	HMDB0002511	-	-	-	-
Com_238_neg	Raffinose	Carbohydrates And Its Derivatives	NEG	504.437	C18H32O16	1.009	813800	1049000	1064000	2725000	2628000	1930000	4610000	3707000	2206000	1473000	2077000	2040000	2329000	2218000	2320000	411700	310100	483600	1438000	1107000	1008000	3448000	6635000	3953000	982100	1234000	1237000	1182000	2257000	1852000	1793000	3144000	1818000	1264000	512-69-6	HMDB0003213	C00492	ko01100//Metabolic pathways;ko02010//ABC transporters;ko00052//Galactose metabolism	Carbohydrate metabolism;Global and overview maps;Membrane transport	Environmental Information Processing;Metabolism
Com_239_neg	p-Coumaric Acid	Cinnamic acids and derivatives	NEG	164.16	C9H8O3	6.549	140600	163300	146100	58830	59200	63980	92230	98780	113300	108300	110600	112000	253200	113600	181700	92550	132500	102100	100500	93010	89040	69540	179100	131300	109400	99770	90050	109000	112000	105800	128600	114900	94870	110900	4501-31-9	HMDB0030677	C00811	ko01100//Metabolic pathways;ko01110//Biosynthesis of secondary metabolites;ko00940//Phenylpropanoid biosynthesis;ko01220//Degradation of aromatic compounds;ko00350//Tyrosine metabolism;ko00130//Ubiquinone and other terpenoid-quinone biosynthesis;ko00950//Isoquinoline alkaloid biosynthesis	Amino acid metabolism;Biosynthesis of other secondary metabolites;Global and overview maps;Metabolism of cofactors and vitamins	Metabolism
Com_240_neg	R-Notoginsenoside R2	Terpenoids	NEG	770.999	C41H70O13	8.8	30050	44760	15080	21450	13120	16450	9632	19790	10860	26700	22060	31730	14360	13580	4695	29430	24170	20750	14080	21690	21140	43020	59550	50890	27460	18230	25330	20060	12890	13980	13750	11350	16390	19120	--	--	-	-	-	-
Com_241_neg	Hyperoside	Flavones and Flavonols	NEG	464.38	C21H20O12	6.554	735200	786100	652800	394700	415600	515000	235900	366300	327900	369900	344600	489000	340200	157500	231300	9797	21360	16520	35970	62330	43200	21110	45340	45610	27140	15920	24750	63670	70050	74650	221800	212600	226100	201100	482-36-0	HMDB0030775	-	-	-	-
Com_242_neg	Vanillic acid	Organic Acid And Its Derivatives	NEG	168.15	C8H8O4	5.901	25310	45680	31600	26040	35770	35790	45130	31160	55840	59200	36990	65530	52260	47300	56680	31740	41370	38580	34820	41630	29600	40270	58090	53180	21880	34950	29100	27090	38800	47180	33480	41810	41600	41420	3943-74-6	HMDB0240266	C06672	ko01120//Microbial metabolism in diverse environments	Global and overview maps	Metabolism
Com_243_neg	Notoginsenoside R1	Terpenoids	NEG	933.141	C47H80O18	7.26	8318	8746	6754	8727	7705	9579	8477	9108	7630	3607	9781	13540	11500	7809	14740	15390	9724	13630	13080	17840	11350	13190	27180	13930	13140	18910	24270	5253	13060	10160	5656	6934	10640	7161	80418-24-2	HMDB0035363	-	-	-	-
Com_244_neg	D-Glucose	Carbohydrates And Its Derivatives	NEG	180.156	C6H12O6	0.94	283900	212200	181800	208400	289100	175900	279800	243700	230300	195300	179700	287500	302300	177100	191300	112400	178400	183500	173800	116800	210100	274100	310700	236300	151400	174800	167100	266900	198600	201000	159000	206900	208400	188500	-	HMDB0242534	C00031	ko01100//Metabolic pathways;ko01110//Biosynthesis of secondary metabolites;ko02010//ABC transporters;ko00052//Galactose metabolism;ko00520//Amino sugar and nucleotide sugar metabolism;ko00030//Pentose phosphate pathway;ko00010//Glycolysis / Gluconeogenesis;ko00500//Starch and sucrose metabolism;ko00901//Indole alkaloid biosynthesis;ko04931//Insulin resistance;ko04933//AGE-RAGE signaling pathway i…	Biosynthesis of other secondary metabolites;Carbohydrate metabolism;Endocrine and metabolic disease;Global and overview maps;Membrane transport	Environmental Information Processing;Human Diseases;Metabolism
Com_245_neg	Naringenin	Flavanones	NEG	272.25	C15H12O5	8.683	1858	2107	1738	1901	3747	4236	4047	3295	4420	2758	3997	3606	4473	1809	1953	6785	8493	9132	2969	2855	9258	3451	4977	6708	3124	3177	5939	2788	3308	1917	2309	3834	2700	5773	480-41-1	HMDB0002670	C00509	ko01100//Metabolic pathways;ko01110//Biosynthesis of secondary metabolites;ko00941//Flavonoid biosynthesis;ko00943//Isoflavonoid biosynthesis	Biosynthesis of other secondary metabolites;Global and overview maps	Metabolism
Com_246_neg	1,7-Dimethylxanthine	Purines and purine derivatives	NEG	180.164	C7H8N4O2	9.96	78330	75310	92640	135600	136700	131100	148000	122500	134100	99380	115000	132300	161800	138300	147200	80380	64740	82780	131600	114300	126600	126600	172900	148500	134300	164400	160500	157400	153000	145100	139300	138000	134300	137500	611-59-6	HMDB0001860	C13747	ko01100//Metabolic pathways;ko01110//Biosynthesis of secondary metabolites;ko01120//Microbial metabolism in diverse environments;ko00232//Caffeine metabolism	Biosynthesis of other secondary metabolites;Global and overview maps	Metabolism
Com_247_neg	Lonicerin	Flavonoids	NEG	594.526	C27H30O15	6.73	148400	353300	253300	587300	553900	701200	484000	497400	469600	370900	322100	609400	2531000	1407000	3779000	6280237	6219237	4834975	5775000	4906000	7552000	8051000	13210000	14280000	6929008	7147587	9145358	16150000	21360000	22230000	3819000	3858000	4382000	4228000	25694-72-8	HMDB0005799	-	-	-	-
Com_248_neg	Hexadecanedioic acid	Fatty Acyls	NEG	286.41	C16H30O4	11.908	23970	25570	17250	17500	25760	21080	20160	20550	20670	20080	29080	28520	26760	24950	25580	20710	23170	18880	20380	27540	22750	28180	22140	22640	21440	21510	24000	20370	23910	25270	17000	22520	20870	19590	-	HMDB0304377	-	-	-	-
Com_249_neg	3,5-Dihydroxybenzoic acid	Benzoic acids and derivatives	NEG	154.12	C7H6O4	4.461	100000	140700	58510	98530	73000	116500	157600	87340	342200	117100	138600	74430	264100	73920	97580	194600	124900	98800	138500	244500	133000	126300	170700	188300	129700	128400	93800	126900	171600	173000	127300	239500	135700	118200	1999-10-05	HMDB0013677	-	-	-	-
Com_250_neg	2,6-Dihydroxybenzoic acid	Benzoic acids and derivatives	NEG	154.12	C7H6O4	6.13	206900	298100	197600	210000	188200	188100	141800	199900	126900	289300	188200	255300	494200	578400	571100	236100	180200	123200	260000	396700	442300	271700	622600	413400	506400	525700	472500	1527000	1707000	2034000	477400	456500	432400	468800	303-07-1	HMDB0013676	-	-	-	-
Com_251_neg	1,11-Undecanedicarboxylic acid	Organic Acid And Its Derivatives	NEG	244.33	C13H24O4	10.093	272600	298000	299500	310700	273700	263000	343600	281000	280600	284400	286800	281700	282000	298300	288200	306600	268300	310900	316600	250700	278500	294100	285000	278300	274500	282400	282300	292700	323800	258200	283400	314100	288800	284400	505-52-2	HMDB0002327	-	-	-	-
Com_252_neg	Cistanoside F	Fatty Acyls	NEG	488.445	C21H28O13	5.02	4420	4925	5007	5397	4145	5180	5500	5521	4219	3350	3954	5091	4561	5637	5155	9255	8857	8627	10160	7666	5171	8359	10580	8500	15760	10070	10300	5291	7265	3160	7242	3387	7577	4379	--	--	-	-	-	-
Com_253_neg	Maltotriose	Carbohydrates And Its Derivatives	NEG	504.44	C18H32O16	0.94	16020	21420	27430	14280	16820	22240	28170	33590	27330	14780	13890	14280	27590	19240	14690	21420	18070	18930	18250	10660	16790	44720	54680	50710	12030	11760	12640	12470	16820	30180	20390	22290	27360	26150	6118-87-2	HMDB0038852	C01835	ko02010//ABC transporters	Membrane transport	Environmental Information Processing
Com_254_neg	Glycolic acid	Organic Acid And Its Derivatives	NEG	76.05	C2H4O3	0.99	44884	136500	21580	20770	22900	21410	37251	78110	38643	66650	121800	68230	22170	21550	42978	46471	20580	25230	45620	41723	39332	50470	84710	18200	85060	47640	113200	46361	58261	57493	26430	29240	48940	46260	-	HMDB0304424	C00160	ko01100//Metabolic pathways;ko01110//Biosynthesis of secondary metabolites;ko01120//Microbial metabolism in diverse environments;ko01200//Carbon metabolism;ko00630//Glyoxylate and dicarboxylate metabolism	Carbohydrate metabolism;Global and overview maps	Metabolism
Com_255_neg	beta-L-Arabinose	Carbohydrates And Its Derivatives	NEG	150.13	C5H10O5	0.9	1144000	1068000	967800	1149000	1134000	1087000	797100	1022000	733400	770500	699300	945800	877000	982600	998600	529600	532200	494600	589400	500400	478900	533600	599700	466500	771800	851000	966100	708000	749800	758700	743800	928700	813500	768700	7296-56-2	HMDB0000646	-	-	-	-
Com_256_neg	Shogaol	Benzene and substituted derivatives	NEG	276.371	C17H24O3	12.09	755600	876400	901300	898400	820900	853100	835900	765800	792300	823900	782700	879300	809500	797500	829200	863000	820700	855400	905900	895600	847700	837300	822000	836800	851800	845200	821000	897900	870900	857900	946600	803500	779700	848900	--	--	-	-	-	-
Com_257_neg	Hordatine B	Benzene and substituted derivatives	NEG	580.1	C29H40N8O5	6.94	79183	81747	77015	5626	36485	42738	54463	52714	55700	24470	7603	69940	381000	323200	395300	110665	122545	99852	49983	47488	5505	58350	4504	78249	30110	127200	121300	83020	75770	86450	43260	29860	27010	19550	10502-21-3	HMDB0030459	-	-	-	-
Com_258_neg	Isovitexin	Flavones and Flavonols	NEG	432.378	C21H20O10	6.533	30620000	36780000	25860000	20570000	21860000	27100000	19540000	26300000	26060000	28200000	29300000	40020000	38490000	23920000	27300000	46900000	51640000	42480000	22680000	31120000	29490000	33310000	48300000	34500000	39580000	38680000	49740000	14510000	14240000	14540000	32150000	28270000	29610000	30010000	-	HMDB0253708	C01714	ko00944//Flavone and flavonol biosynthesis	Biosynthesis of other secondary metabolites	Metabolism
Com_259_neg	Isochlorogenic acid C	Alcohols and polyols	NEG	516.451	C25H24O12	7.053	406500	430100	314700	427600	484900	676800	401300	454600	476100	456800	368500	598100	488400	341700	271700	14680	14000	15710	32010	40230	33340	19550	22810	27020	62890	70530	62970	39910	76520	57650	216600	229400	228900	205600	57378-72-0	HMDB0030707	-	-	-	-
Com_260_neg	2'-Deoxyguanosine	Nucleotide And Its Derivates	NEG	267.241	C10H13N5O4	3.181	20480	27850	17290	27820	149218	39030	48440	57550	56940	352500	293600	410000	892700	519800	1295000	204328	48630	43740	44900	15700	75440	82080	150300	133700	308838	328100	495400	903700	823400	1057000	238600	245900	234700	244200	961-07-9	HMDB0000085	C00330	ko01100//Metabolic pathways;ko02010//ABC transporters;ko00230//Purine metabolism	Global and overview maps;Membrane transport;Nucleotide metabolism	Environmental Information Processing;Metabolism
Com_261_neg	(-)-Jasmonoyl-L-isoleucine	Phytohormones	NEG	323.21	C18H29NO4	9.94	9365	9144	8710	3945	3007	4027	7440	15460	10140	10840	14680	24360	14970	14540	15320	11041	10221	11805	8261	9442	6031	14730	30730	17330	17490	21700	20440	18130	20400	23700	8940	10840	7999	9893	--	--	-	-	-	-
Com_262_neg	9,10-EODE	Fatty Acyls	NEG	296	C18H32O3	1.69	28264	37256	24432	10190	14670	27830	20980	34990	20830	19720	27430	36050	80280	77370	67370	4609	35741	32773	26570	31230	36010	30670	66950	72650	61410	70890	79680	57190	98160	72240	56230	49330	46160	44900	--	--	-	-	-	-
Com_263_neg	Nystose	Carbohydrates And Its Derivatives	NEG	666.578	C24H42O21	1.03	26530	52590	29100	53790	29280	27010	66450	75830	26330	15330	10970	8773	47250	31920	50180	30560	25630	39470	14700	13420	33200	57080	120100	196400	10060	15160	10940	59780	102000	58640	39300	42080	49310	50060	13133-07-8	HMDB0039176	-	-	-	-
Com_264_neg	Allysine	Amino Acid And Derivatives	NEG	145.074	C6H11NO3	1.11	57210	59640	57140	42970	25220	15800	26640	18910	18960	11500	23260	11360	52120	50290	45040	60050	61550	50150	10290	23240	7593	12980	16830	25788	39760	35070	38760	23900	26810	28440	28220	28970	36880	31370	6665-12-09	HMDB0001263	C04076	ko01100//Metabolic pathways;ko01110//Biosynthesis of secondary metabolites;ko01230//Biosynthesis of amino acids;ko00310//Lysine degradation;ko00960//Tropane, piperidine and pyridine alkaloid biosynthesis;ko00300//Lysine biosynthesis	Amino acid metabolism;Biosynthesis of other secondary metabolites;Global and overview maps	Metabolism
Com_265_neg	4-Hydroxyisoleucine	Amino Acid And Derivatives	NEG	147.172	C6H13NO3	1.038	6370000	4868000	4747000	1979000	1705000	2033000	2301000	2092000	1898000	1689000	1620000	1722000	2429000	2282000	2088000	5142000	4678000	5138000	1777000	2190000	1986000	2668000	2200000	2178000	1432000	1535000	1775000	1860000	1834000	1998000	2620000	2660000	2733000	2577000	--	--	-	-	-	-
Com_266_neg	Pyridoxal 5-phosphate monohydrate	Pyridines and derivatives	NEG	265.16	C8H12NO7P	1.7	75640	42710	76940	34160	47620	48360	36060	41210	38220	48310	55310	72000	66080	67490	29090	57970	64810	54170	58390	46990	58230	47870	63970	35800	72910	73170	76320	42410	28950	36360	45650	43550	57220	47550	--	--	-	-	-	-
Com_267_neg	D-Galactose	Carbohydrates And Its Derivatives	NEG	180.16	C6H12O6	0.9	463600	456300	352300	500800	520900	564900	600400	588400	549600	407800	373000	639700	832000	445700	584600	313400	583600	392400	454400	511200	579100	622800	788600	549200	488100	364300	616100	345100	381200	394000	400800	425000	377700	406200	-	HMDB0250761	C00124	ko01100//Metabolic pathways;ko00052//Galactose metabolism	Carbohydrate metabolism;Global and overview maps	Metabolism
Com_268_neg	Coniferin	Carbohydrates And Its Derivatives	NEG	342.132	C16H22O8	0.97	13930000	15420000	13310000	26500000	24600000	29850000	21640000	26150000	19100000	16600000	10590000	17330000	23170000	17930000	15660000	8372000	8840000	7434000	25050000	25000000	18730000	17690000	26580000	25360000	14340000	16180000	22850000	17520000	23570000	22170000	18160000	20020000	23780000	19120000	124151-33-3	HMDB0013682	C00761	ko01110//Biosynthesis of secondary metabolites;ko00940//Phenylpropanoid biosynthesis	Biosynthesis of other secondary metabolites;Global and overview maps	Metabolism
Com_269_neg	D(+)-Melezitose O-rhamnoside	Carbohydrates And Its Derivatives	NEG	650.1	C24H42O20	1.05	12170	9669	16470	13190	23460	24480	31320	34620	16540	23670	21000	58070	21080	28120	33230	17570	10170	19400	17490	19520	24050	33260	44760	28160	41270	36010	36020	19670	30880	26270	30970	23580	26290	21130	--	--	-	-	-	-
Com_270_neg	D-Ribose	Carbohydrates And Its Derivatives	NEG	150.13	C5H10O5	0.92	169900	154200	152200	206900	163900	156300	138900	170900	116500	135800	124200	167500	138500	149400	163800	86930	79500	106900	95870	70130	118500	96090	151000	100400	152300	173500	177200	123600	134000	157000	141900	105100	137000	123500	613-83-2	HMDB0000283	-	-	-	-
Com_271_neg	2-Hydroxy-2-methylbutanoic acid	Fatty Acyls	NEG	118.13	C5H10O3	4.61	7096	3212	3322	2759	2139	8520	2896	5883	6026	8141	3518	13390	26120	16870	24460	6140	8057	5500	3834	7991	2156	3417	4857	3282	10640	9283	12640	10570	11900	8310	4855	8002	3488	5995	3739-30-8	HMDB0001987	-	-	-	-
Com_272_neg	2'-Hydroxygenistein	Isoflavonoids	NEG	286.048	C15H10O6	8.02	28230	48380	20700	13290	14670	16150	25580	40650	33982	33600	39670	41950	29650	12800	32900	99120	113200	81220	87900	73500	45230	39530	42490	51000	74090	93190	96910	21750	25450	43200	48990	49830	27220	45770	1156-78-1	HMDB0034014	C12134	ko00943//Isoflavonoid biosynthesis	Biosynthesis of other secondary metabolites	Metabolism
Com_273_neg	Afzelechin	Flavonoids	NEG	274.084	C15H14O5	0.68	154600	242400	166200	226000	198000	197100	158000	207300	202900	268000	184600	273600	366000	237700	317100	137500	175600	101000	194500	210100	205000	191400	381500	294300	173200	158100	217600	269600	331000	300400	201600	227200	202000	226600	2545-00-8	HMDB0030823	C09320	ko01110//Biosynthesis of secondary metabolites;ko00941//Flavonoid biosynthesis	Biosynthesis of other secondary metabolites;Global and overview maps	Metabolism
Com_274_neg	8-Epiloganic acid	Terpenoids	NEG	376.36	C16H24O10	4.83	19910	23330	21960	17010	23310	29610	17780	18400	12010	9698	11660	20190	19430	20720	23340	25570	34350	33850	25780	26080	22160	28690	34870	29280	39250	35020	36530	14360	19380	15050	20230	30060	22600	26240	-	HMDB0247433	-	-	-	-
Com_275_neg	GA7-1	Phytohormones	NEG	330.4	C19H22O5	9.22	2078000	2902000	2199000	2050000	2212000	2397000	1921000	2110000	1961000	1315000	1171000	2063000	2050000	1492000	1795000	1436000	1489000	1261000	1877000	2169000	2122000	2041000	3927000	2665000	1192000	1221000	1393000	1156000	1315000	1435000	1755000	1905000	1703000	1769000	--	--	-	-	-	-
Com_276_neg	D-Xylose	Carbohydrates And Its Derivatives	NEG	150.131	C5H10O5	1.01	55140	50010	34340	47810	46610	56830	35710	48900	31680	32960	38120	39800	44420	31290	42730	11490	28370	31490	20290	22790	23060	20610	24290	23140	30950	48580	32110	35730	31030	40100	31670	40610	32140	30570	58-86-6	HMDB0000098	C00181	ko01100//Metabolic pathways;ko02010//ABC transporters;ko00520//Amino sugar and nucleotide sugar metabolism;ko00040//Pentose and glucuronate interconversions	Carbohydrate metabolism;Global and overview maps;Membrane transport	Environmental Information Processing;Metabolism
Com_277_neg	Fmoc-Ile-OH	Amino Acid And Derivatives	NEG	353.418	C21H23NO4	7.71	5059	11670	9803	57910	73440	82950	102200	92300	102700	16940	10180	16340	37360	28060	34280	4165	4783	4592	45420	34990	40230	19050	46390	36010	13530	11040	12540	19030	12820	15250	30540	33820	27750	34890	--	--	-	-	-	-
Com_278_neg	Menadione	Vitamins	NEG	254.262	C11H10O5S	1.1	29830	33940	31900	30490	36370	43140	38300	37430	31340	34200	28220	39600	53030	43190	38930	30940	32430	26890	24220	26280	29190	27190	37190	24460	35470	35890	51460	23120	32760	41390	30200	38150	34150	35760	-	HMDB0254432	-	-	-	-
Com_279_neg	Flavin Adenine Dinucleotide	Nucleotide And Its Derivates	NEG	785.55	C27H33N9O15P2	5.16	44000	38400	34200	42100	34720	36300	44120	39220	24340	23130	30250	44380	33040	30710	18580	36510	38930	29410	47810	47310	41640	51800	103400	50040	44220	56820	71380	20900	31760	36490	35750	41350	37540	32590	-	HMDB0252293	C00016	ko01100//Metabolic pathways;ko01110//Biosynthesis of secondary metabolites;ko00740//Riboflavin metabolism	Global and overview maps;Metabolism of cofactors and vitamins	Metabolism
Com_280_neg	Stachyose	Carbohydrates And Its Derivatives	NEG	666.578	C24H42O21	0.93	15060	18770	25530	20000	13870	21660	20310	29320	19670	30940	20500	22450	45510	33790	24750	10070	13180	21970	18840	14360	20970	39550	104400	44170	11890	11530	27200	29600	20890	25100	19660	31730	21410	28880	470-55-3	HMDB0003553	C01613	ko01100//Metabolic pathways;ko00052//Galactose metabolism	Carbohydrate metabolism;Global and overview maps	Metabolism
Com_281_neg	Icariside E5	Phenylpropanoids and polyketides	NEG	522.21	C26H34O11	6.56	28450	49050	30360	17380	19930	25870	21110	26000	23800	29900	31300	56150	38000	23030	34620	30810	43270	30460	29340	26840	24070	26150	52490	43740	39380	35670	49990	22770	38120	42540	28850	33390	24030	39220	126176-79-2	HMDB0034749	-	-	-	-
Com_282_neg	6'-O-Feruloyl-D-sucrose	Phenolic acids	NEG	518.164	C22H30O14	0.69	103400	218200	71350	120600	93960	152800	59160	80340	93320	136400	74990	191300	348400	173300	300700	53700	34110	38930	70060	79700	103100	77250	207300	144500	73660	63800	102700	133700	264100	240400	114100	120200	125000	117000	--	--	-	-	-	-
Com_283_neg	Capsianoside I	Terpenoids	NEG	660.336	C32H52O14	0.98	306800	330400	310000	424800	446800	563400	712000	678400	732100	393200	286400	494400	709900	515300	423400	322200	304600	311300	363400	442400	339300	750800	1152000	978900	344000	281400	386100	342300	478000	358000	495500	406100	432900	441700	121924-04-7	HMDB0002318	-	-	-	-
Com_284_neg	13(S)-HODE;13(S)-Hydroxyoctadeca-9Z,11E-dienoic acid	Fatty Acyls	NEG	296.235	C18H32O3	12.61	275400	301900	198300	106000	106800	123500	116600	159200	130500	68080	70870	111200	162400	104000	242900	112100	122900	88660	88720	115600	122800	132400	250100	185300	72150	66090	73820	79180	89800	93900	112500	105400	110200	117100	--	--	-	-	-	-
Com_285_neg	Methyl salicylate-2-O-glucoside	Phenolic acids	NEG	314.1	C14H18O8	4.8	14680	20920	15900	18200	22820	22890	17120	26210	19050	35240	30560	62700	91710	47590	70700	16130	18670	9764	16380	16630	18610	24960	34160	23770	66990	65970	94590	41590	41320	40990	31750	34870	36150	37140	--	--	-	-	-	-
Com_286_neg	Sodium Valproate	Fatty Acyls	NEG	166.097	C8H15NaO2	5.01	4051	29141	26234	6582	14590	12230	16120	18820	23380	48960	39400	64970	82430	69440	73290	35818	35243	35178	6938	5181	7626	20800	33350	31670	79480	91240	97620	50500	55620	67830	27950	28310	31400	28970	99-66-1	HMDB0001877	-	-	-	-
Com_287_neg	Creatine	Amino Acid And Derivatives	NEG	131.133	C4H9N3O2	1.95	23660	22110	13610	30830	30960	32800	27400	29440	17840	29870	25490	38540	102200	81810	103100	25130	30190	22470	46670	51930	45410	49100	79240	62080	79070	92680	95970	74640	80890	85870	51430	43500	57550	47960	57-00-1	HMDB0000064	C00300	ko01100//Metabolic pathways;ko00330//Arginine and proline metabolism;ko00260//Glycine, serine and threonine metabolism	Amino acid metabolism;Global and overview maps	Metabolism
Com_288_neg	2-Deoxyribose 5'-phosphate	Nucleotide And Its Derivates	NEG	214.1	C5H11O7P	1.22	24300	16410	19950	31490	16290	12980	15650	16450	27640	18490	8060	14170	18430	17160	15510	30770	21090	33450	12210	18880	16190	24950	25180	13140	25720	12370	24820	13020	33030	16790	15940	27520	12890	28660	--	--	-	-	-	-
Com_289_neg	D-Galacturonic acid	Carbohydrates And Its Derivatives	NEG	194.139	C6H10O7	1.56	87550	147200	76980	309800	181200	253000	431600	310600	350100	409900	404100	447300	1137000	634300	902000	124800	163000	127600	235900	238800	385500	377400	820100	605400	434500	650700	728100	697600	822100	946600	394800	606000	363900	434600	-	HMDB0062783	C00333	ko01100//Metabolic pathways;ko02010//ABC transporters;ko00520//Amino sugar and nucleotide sugar metabolism;ko00040//Pentose and glucuronate interconversions;ko00053//Ascorbate and aldarate metabolism	Carbohydrate metabolism;Global and overview maps;Membrane transport	Environmental Information Processing;Metabolism
Com_290_neg	12-OH-JA-Ile-1	Phytohormones	NEG	339.4	C18H29NO5	7.8	7828	8974	5828	6760	7666	9372	5683	6514	6319	7485	7699	10040	14190	8656	4888	6269	5175	7160	5743	5393	5246	6144	11080	7950	9320	11490	10150	15860	8902	19140	9923	4277	4834	6835	--	--	-	-	-	-
Com_291_neg	Orotidine	Nucleotide And Its Derivates	NEG	288.211	C10H12N2O8	1	40770	52310	36770	58140	44100	42830	37070	57900	20760	48920	42790	51730	80050	57750	66010	41340	41250	44830	50260	51150	39540	45420	64520	47740	83970	80810	73280	75270	74610	64160	66330	57350	43130	41680	314-50-1	HMDB0000788	C01103	ko01100//Metabolic pathways;ko00240//Pyrimidine metabolism	Global and overview maps;Nucleotide metabolism	Metabolism
Com_292_neg	1-O-b-D-glucopyranosyl sinapate	Polyphenol	NEG	386.351	C17H22O10	5.88	1011000	1058000	816700	577400	731400	1054000	395100	456800	459800	139400	102900	283800	296200	227700	223100	134100	146400	114600	330600	390900	339900	265300	377400	284100	492800	342700	408300	119300	166600	138900	385100	389000	392900	374200	--	--	-	-	-	-
Com_293_neg	L-Homoserine	Amino Acid And Derivatives	NEG	119.119	C4H9NO3	1.9	6525	5910	9111	8941	11450	17540	12180	6437	9994	9293	9984	11000	14900	10670	9912	5213	8549	7995	17340	14720	10220	5810	17460	19200	10560	13740	11560	6639	8463	8548	9716	12320	9050	10860	672-15-1	HMDB0000719	C00263	ko01100//Metabolic pathways;ko01110//Biosynthesis of secondary metabolites;ko01120//Microbial metabolism in diverse environments;ko01230//Biosynthesis of amino acids;ko00270//Cysteine and methionine metabolism;ko00260//Glycine, serine and threonine metabolism;ko00300//Lysine biosynthesis;ko00920//Sulfur metabolism	Amino acid metabolism;Energy metabolism;Global and overview maps	Metabolism
Com_294_neg	D-threo-Isocitric acid	Organic Acid And Its Derivatives	NEG	192.124	C6H8O7	1.41	1709000	2607000	1530000	4668000	3962000	5834000	6978000	6572000	6134000	6833000	7240000	8948000	22940000	12530000	16860000	2634000	3024000	2216000	4937000	5136000	6713000	7092000	16210000	11620000	8813000	12780000	13830000	13590000	17370000	20520000	7722000	9584000	7287000	8136000	-	HMDB0304324	-	-	-	-
Com_295_neg	9-KODE	Fatty Acyls	NEG	294.2	C18H30O3	12.07	153900	255700	183900	159200	159900	158600	108700	126100	142400	119100	105200	208700	203000	124400	225600	156100	184400	114600	399900	457200	366200	254800	451100	282900	254400	212100	207400	132100	141000	154900	195600	184700	176100	182100	-	HMDB0004669	C14766	ko00591//Linoleic acid metabolism	Lipid metabolism	Metabolism
Com_296_neg	D-Glucose 6-phosphate	Carbohydrates And Its Derivatives	NEG	260.03	C6H13O9P	0.86	6685000	6017000	5510000	4843000	4364000	4479000	6786000	5602000	6029000	3246000	4197000	5373000	4985000	4457000	2108000	4276000	5601000	5130000	3984000	3723000	4094000	4927000	7501000	5133000	3400000	3888000	3351000	2860000	3727000	4173000	5061000	4325000	4425000	4378000	56-73-5	HMDB0001401	C00092	ko01100//Metabolic pathways;ko01110//Biosynthesis of secondary metabolites;ko00500//Starch and sucrose metabolism;ko04931//Insulin resistance;ko00562//Inositol phosphate metabolism	Carbohydrate metabolism;Endocrine and metabolic disease;Global and overview maps	Human Diseases;Metabolism
Com_297_neg	L-(+)-Rhamnose Monohydrate	Carbohydrates And Its Derivatives	NEG	182.17	C6H14O6	0.96	9295	9106	3900	8251	13600	15690	12090	9084	16220	8090	10370	11230	14080	15320	11440	7700	7344	8482	16040	9262	12310	14100	15200	9524	10040	9191	8255	9401	7336	12640	11960	7385	22950	13260	3615-41-6	HMDB0000849	C00507	ko01100//Metabolic pathways;ko01120//Microbial metabolism in diverse environments;ko00051//Fructose and mannose metabolism	Carbohydrate metabolism;Global and overview maps	Metabolism
Com_298_neg	2-Deoxyribose 1-Phosphate	Nucleotide And Its Derivates	NEG	214.11	C5H11O7P	1.01	20079	25194	19255	34230	18500	25340	27410	42310	36520	34500	30210	43440	30200	25940	43360	6313	18562	10460	19215	20090	16730	23529	23260	20340	23710	24810	28740	27130	26840	29040	19050	26680	32410	28300	17210-42-3	HMDB0001351	C00672	ko01100//Metabolic pathways;ko00240//Pyrimidine metabolism;ko00030//Pentose phosphate pathway	Carbohydrate metabolism;Global and overview maps;Nucleotide metabolism	Metabolism
Com_299_neg	phosphoribosyl pyrophosphate	Pentose phosphates	NEG	196.25	C5H13O14P3	0.88	20000	13720	17600	10970	16880	17740	20580	17790	19120	37610	30480	44790	46930	38510	17720	30750	25800	35630	25020	21370	24360	36920	28140	26680	59510	45540	54350	38410	48600	41510	35360	39940	25390	25290	7540-64-9	HMDB0000280	C00119	ko01100//Metabolic pathways;ko01110//Biosynthesis of secondary metabolites;ko01120//Microbial metabolism in diverse environments;ko01230//Biosynthesis of amino acids;ko01200//Carbon metabolism;ko00230//Purine metabolism;ko00240//Pyrimidine metabolism;ko00030//Pentose phosphate pathway;ko00400//Phenylalanine, tyrosine and tryptophan biosynthesis;ko00340//Histidine metabolism;ko00790//Folate biosyn…	Amino acid metabolism;Carbohydrate metabolism;Global and overview maps;Metabolism of cofactors and vitamins;Nucleotide metabolism	Metabolism
Com_300_neg	Succinic anhydride	Organic Acid And Its Derivatives	NEG	100.073	C4H4O3	0.88	27310000	34100000	26980000	26450000	30730000	26170000	23430000	23030000	26640000	21010000	16950000	18830000	16830000	13470000	18760000	25160000	25430000	21810000	21090000	23430000	25130000	18100000	22940000	26800000	14920000	13400000	16430000	14540000	19680000	17190000	21330000	20150000	23250000	20230000	108-30-5	HMDB0032523	-	-	-	-
Com_301_neg	D-Tagatose	Carbohydrates And Its Derivatives	NEG	180.156	C6H12O6	0.96	103900	123500	108700	93850	102900	105900	123600	139100	142900	64900	70200	78120	67580	56950	60770	45640	53800	55710	92390	106300	101200	130900	114600	141100	71290	66960	63290	50890	72690	52890	95440	85670	74570	86730	20197-42-6	HMDB0003418	C00795	ko01100//Metabolic pathways;ko00052//Galactose metabolism	Carbohydrate metabolism;Global and overview maps	Metabolism
Com_302_neg	Plantamajoside	Cinnamic acids and derivatives	NEG	640.587	C29H36O16	6.35	18260	22740	14580	21080	16350	31730	26810	26930	29010	13550	17680	38760	49650	33750	13430	5441	4203	12350	17090	26580	15470	13550	33040	30020	18020	22260	16630	15510	17190	19770	27000	22510	22750	19070	-	HMDB0256632	-	-	-	-
Com_303_neg	Manninotriose	Fatty Acyls	NEG	504.437	C18H32O16	0.9	30100	25920	17000	15070	18980	24510	19840	19700	13470	15800	15290	16240	17600	13510	19610	18630	13030	16720	31770	32830	31940	27730	38650	28070	18490	9569	30040	20130	25560	23470	14600	24460	19700	28680	-	HMDB0247628	C05404	ko01100//Metabolic pathways;ko00052//Galactose metabolism	Carbohydrate metabolism;Global and overview maps	Metabolism
Com_304_neg	Orientin	Flavones and Flavonols	NEG	448.377	C21H20O11	6.25	64250000	67170000	59850000	50300000	44050000	43950000	31480000	41870000	40160000	41670000	38480000	55960000	40630000	26480000	28610000	60350000	54150000	43940000	24310000	31740000	30100000	23850000	32220000	28050000	31670000	34140000	42390000	22350000	19640000	20980000	39460000	35340000	35150000	39800000	28608-75-5	HMDB0030614	-	-	-	-
Com_305_neg	Chicoric acid	Organic Acid And Its Derivatives	NEG	474.371	C22H18O12	5.57	144000	166900	125100	188100	201800	222700	148900	147800	144100	104200	87170	129600	178800	142700	150900	75590	80160	72070	235200	238600	195400	128700	174700	121000	193300	193900	206100	93730	106500	98910	215600	160900	160300	121000	52248-48-3	HMDB0033938	-	-	-	-
Com_306_neg	3-Phenylpropanoic acid	Cinnamic acids and derivatives	NEG	150.174	C9H10O2	0.7	192400	285600	199600	222800	243400	260400	230300	224800	214900	264500	209700	246900	371000	293400	292200	274500	168500	179200	191300	232400	251100	225700	356200	302200	207900	216300	281000	325900	347100	345000	281400	288200	242300	250300	501-52-0	HMDB0000764	C05629	ko01100//Metabolic pathways;ko01120//Microbial metabolism in diverse environments;ko01220//Degradation of aromatic compounds;ko00360//Phenylalanine metabolism	Amino acid metabolism;Global and overview maps	Metabolism
Com_307_neg	N-Acetyl-L-glutamic acid	Amino Acid And Derivatives	NEG	189.166	C7H11NO5	1.81	571300	637100	421800	139400	166400	155000	42310	57010	43110	104100	101100	201900	150100	121000	124600	375100	363200	317800	178400	168800	175500	61200	147700	100200	152100	139300	190400	57630	85330	88320	177800	196100	168700	162900	1188-37-0	HMDB0001138	C00624	ko01100//Metabolic pathways;ko01110//Biosynthesis of secondary metabolites;ko01230//Biosynthesis of amino acids;ko01210//2-Oxocarboxylic acid metabolism;ko00220//Arginine biosynthesis	Amino acid metabolism;Global and overview maps	Metabolism
Com_308_neg	Cyclic AMP	Nucleotide And Its Derivates	NEG	329.206	C10H12N5O6P	1.75	1012000	1409000	866500	896400	927600	944000	1337000	1426000	1351000	2796000	2452000	3528000	3617000	2335000	2356000	3102000	3234000	2565000	2772000	2868000	2841000	2679000	5213000	3419000	2821000	2894000	3426000	2482000	3605000	3553000	2380000	2725000	2377000	2253000	60-92-4	HMDB0000058	C00575	ko01100//Metabolic pathways;ko00230//Purine metabolism	Global and overview maps;Nucleotide metabolism	Metabolism
Com_309_neg	Pseudouridine	Nucleotide And Its Derivates	NEG	244.07	C9H12N2O6	1.87	335400	416900	290900	339400	341900	361700	387400	392100	438200	382300	322200	445100	469700	306700	409300	267400	377800	250100	333500	307300	391700	418600	751000	543800	343200	420900	447900	337700	425400	424400	369800	438600	363400	383600	1445-07-4	HMDB0000767	C02067	ko01100//Metabolic pathways;ko00240//Pyrimidine metabolism	Global and overview maps;Nucleotide metabolism	Metabolism
Com_310_neg	Caffeic acid O-glucoside	Cinnamic acids and derivatives	NEG	342	C15H18O9	5.38	257900	305300	246100	282700	320400	444100	300600	296500	280900	506700	367900	480100	402500	265800	263000	252400	274500	206200	306100	419100	331800	293500	436500	300200	397200	363500	477500	187800	208300	214400	278000	299800	290500	305500	--	--	-	-	-	-
Com_311_neg	Methylenesuccinic acid	Fatty Acyls	NEG	130.099	C5H6O4	4.25	87231	101910	91792	61810	8768	58320	107600	109000	68140	159000	27140	120100	175800	35280	191000	73617	86986	55090	49160	103300	33010	158000	186300	116700	94370	127800	171200	158200	314200	188100	112100	132000	195400	122800	97-65-4	HMDB0002092	C00490	ko01100//Metabolic pathways;ko00660//C5-Branched dibasic acid metabolism	Carbohydrate metabolism;Global and overview maps	Metabolism
Com_312_neg	Indole-5-carboxylic acid	Indoles and derivatives	NEG	161.048	C9H7NO2	0.69	879300	1176000	739300	1072000	1103000	1284000	993400	1041000	964800	1125000	919700	1513000	1687000	1162000	1612000	803800	887500	712800	864300	1072000	1127000	1035000	1621000	1390000	884700	1128000	1247000	1253000	1343000	1663000	1051000	1103000	1274000	1079000	-	HMDB0253469	-	-	-	-
Com_313_neg	Deoxycytidine	Nucleotide And Its Derivates	NEG	227.091	C9H13N3O4	1.81	1717	2101	9657	6183	4307	6561	9026	16220	15830	14020	9822	19640	4864	14970	19740	13462	11925	13608	6223	6247	3144	19100	29280	18990	19130	19560	34720	14940	24120	25790	11910	13730	13920	9472	-	HMDB0250725	C00881	ko01100//Metabolic pathways;ko02010//ABC transporters;ko00240//Pyrimidine metabolism	Global and overview maps;Membrane transport;Nucleotide metabolism	Environmental Information Processing;Metabolism
Com_314_neg	Isohemiphloin	Flavanones	NEG	434.121	C21H22O10	6.39	986000	1110000	888600	764100	883300	907500	670900	854200	824100	1051000	905000	1471000	1064000	844100	991500	1994000	1716000	1523000	792100	970900	873600	1027000	1862000	1005000	1110000	1314000	1663000	466800	478000	485600	856300	836800	899400	968600	--	--	-	-	-	-
Com_315_neg	sesamolin	Organoheterocyclic compounds	NEG	370.105	C20H18O7	5.64	91890	125900	96290	222000	261500	301700	151700	176300	130000	116600	93910	202300	331200	348400	377300	285100	315500	273100	686800	785300	723200	545100	839900	526200	822700	896700	951800	489900	587900	554000	396600	394800	365100	379700	526-07-8	HMDB0034119	-	-	-	-
Com_316_neg	Kaempferol 3-O-robinobioside	Flavones and Flavonols	NEG	594.159	C27H30O15	6.55	233800	298800	218400	510800	471600	462000	266500	201600	439900	249800	223700	399300	1292000	1815000	2157000	8676000	9758000	6757000	11970000	14280000	12380000	7203000	10200000	8411000	17500000	14630000	20700000	12450000	11510000	11940000	6734000	5877000	6617000	5765000	--	--	-	-	-	-
Com_317_neg	Sodium Danshensu	Phenylpropanoids and polyketides	NEG	220.15	C9H9NaO5	4.44	6641	3245	8554	5394	7664	8716	9678	19190	12660	17230	7414	17180	34020	34720	31880	8221	10410	6466	13000	10060	14940	12060	18210	19920	31310	41690	38550	17860	12140	18300	17800	11080	14010	13270	--	--	-	-	-	-
Com_318_neg	1-O-beta-D-Glucopyranosyl sinapate	Phenols And Its Derivatives	NEG	386.1	C17H22O10	5.88	2341000	2079000	1533000	1583000	1751000	1963000	909800	1015000	1071000	377000	244500	684600	575600	556100	553900	295400	303900	269800	774800	986200	783500	814000	921200	718500	874500	754100	750600	272700	375700	330100	755300	837400	883600	835700	--	--	-	-	-	-
Com_319_neg	4'-Hydroxyacetophenone	Ketones	NEG	136.15	C8H8O2	6.6	49560	63080	38470	47400	51420	49450	47410	58940	59950	109500	80470	102800	78240	64090	78380	9403	17350	5679	17220	16120	17060	11360	11870	11230	12520	33640	11960	25710	13100	22250	40640	57790	45180	32730	--	--	C10700	ko01100//Metabolic pathways;ko01120//Microbial metabolism in diverse environments	Global and overview maps	Metabolism
Com_320_neg	Luteolin O-hexosyl-O-hexosyl-O-hexoside	Anthocyanins	NEG	772.1	C33H40O21	5.52	20570	26960	24980	45020	50860	58350	20050	24130	13960	11180	6896	17030	13990	12570	5615	7731	10400	6906	41560	57060	83100	39290	54640	53220	4641	24816	6405	21810	27790	38080	26240	27160	23930	25070	--	--	-	-	-	-
Com_321_neg	UDP-D-glucose	Nucleotide And Its Derivates	NEG	566.1	C15H24N2O17P2	0.95	1223000	1318000	700800	1013000	904000	894400	881800	918700	654500	895700	964800	1288000	1300000	707000	781000	3290000	2686000	2272000	1615000	1655000	1431000	1710000	2578000	2186000	1191000	1172000	1347000	488000	636300	653700	1144000	1188000	1200000	1200000	133-89-1	HMDB0000286	C00029	ko01100//Metabolic pathways;ko01110//Biosynthesis of secondary metabolites;ko00052//Galactose metabolism;ko00520//Amino sugar and nucleotide sugar metabolism;ko00908//Zeatin biosynthesis;ko00040//Pentose and glucuronate interconversions;ko00053//Ascorbate and aldarate metabolism;ko00500//Starch and sucrose metabolism;ko00561//Glycerolipid metabolism	Carbohydrate metabolism;Global and overview maps;Lipid metabolism;Metabolism of terpenoids and polyketides	Metabolism
Com_322_neg	Tanshinlactone	Steroids and steroid derivatives	NEG	264.275	C17H12O3	5.2	20630	9606	8159	10770	8457	12730	12060	17670	7840	28820	18450	35790	74610	65860	76630	4717	7533	4510	9910	6140	11470	9442	21800	22520	35260	47300	35980	30630	28750	37690	24680	24100	21050	27940	--	--	-	-	-	-
Com_323_neg	Gallic acid O-Hexoside	Benzoic acids and derivatives	NEG	332	C13H16O10	4.13	84670	111600	89280	97640	115000	101700	70810	75340	79970	38660	31680	46380	141700	106800	137700	110600	116700	94560	164000	237500	216900	162900	240300	227500	142100	149100	182000	351900	337900	472600	145000	152200	147900	145900	--	--	-	-	-	-
Com_324_neg	Vitamin B1	Vitamins	NEG	300.808	C12H17ClN4OS	0.82	4108	13230	10050	7401	3542	4505	8263	7671	4454	6698	6358	4337	82120	6201	9223	8178	3162	2803	3601	4815	3543	3499	10718	9507	8249	9121	5291	2488	5112	5370	5821	4439	3792	3850	-	HMDB0303167	C00378	ko01100//Metabolic pathways;ko02010//ABC transporters;ko04122//Sulfur relay system;ko00730//Thiamine metabolism	Folding, sorting and degradation;Global and overview maps;Membrane transport;Metabolism of cofactors and vitamins	Environmental Information Processing;Genetic Information Processing;Metabolism
Com_325_neg	2-Aminoethanesulfonic acid	Organic Acid And Its Derivatives	NEG	125.015	C2H7NO3S	1.04	200200	211700	164800	189500	216600	232900	140000	160300	99180	122400	97370	263100	136300	191500	220500	190800	171800	116700	212300	355000	196400	200900	202500	232300	127100	197100	173100	373000	343200	321200	241200	234600	188100	272000	107-35-7	HMDB0000251	C00245	ko01100//Metabolic pathways;ko02010//ABC transporters;ko00430//Taurine and hypotaurine metabolism;ko00920//Sulfur metabolism	Energy metabolism;Global and overview maps;Membrane transport;Metabolism of other amino acids	Environmental Information Processing;Metabolism
Com_326_neg	L-threo-3-Methylaspartate	Amino Acid And Derivatives	NEG	147.053	C5H9NO4	0.87	3701000	2988000	2828000	1925000	1620000	1862000	2217000	2063000	1928000	1643000	1719000	1833000	2147000	1941000	1711000	966900	939400	993100	1806000	1864000	1899000	2337000	2187000	1887000	1209000	1215000	1247000	1424000	1427000	1628000	1839000	1893000	1758000	1964000	--	--	C03618	ko01100//Metabolic pathways;ko01120//Microbial metabolism in diverse environments;ko01200//Carbon metabolism;ko00630//Glyoxylate and dicarboxylate metabolism;ko00660//C5-Branched dibasic acid metabolism	Carbohydrate metabolism;Global and overview maps	Metabolism
Com_327_neg	2,2-Dimethylsuccinic acid	Organic Acid And Its Derivatives	NEG	146.058	C6H10O4	0.84	16510000	13190000	12630000	1224000	977900	1017000	1239000	1444000	1307000	911700	821200	956300	2567000	2708000	2740000	24330000	24550000	23080000	1350000	1696000	1829000	2387000	2170000	1690000	2670000	2632000	3162000	2881000	2513000	2489000	5232000	4929000	5147000	5152000	597-43-3	HMDB0002074	-	-	-	-
Com_328_neg	2-O-Caffeoylmalic acid	Phenolic acids	NEG	296.053	C13H12O8	0.69	21200	34980	23440	32730	22320	34490	19340	19120	28230	30610	23010	35110	41180	23300	44070	24780	20400	16860	20680	23180	16250	27210	25160	27890	18730	22490	23960	28870	38210	32640	28030	23410	29470	26110	--	--	-	-	-	-
Com_329_neg	1-(4-Methoxyphenyl)-1-propanol	Phenolic acids	NEG	166.099	C10H14O2	13.5	3591	4116	3835	3680	4377	4520	2644	3959	4179	3075	2974	3268	2917	3645	3376	4038	4723	4179	3828	2721	3329	4683	2851	4295	4110	3651	3668	2953	2928	2852	7135	7722	7169	7905	--	--	-	-	-	-
Com_330_neg	Eicosadienoic acid	Fatty Acyls	NEG	308.272	C20H36O2	6.32	841000	1362000	811400	826700	883200	1153000	1158000	1197000	1197000	1416000	1096000	1628000	2429000	1474000	2170000	1686000	2024000	1546000	1746000	2000000	1974000	2286000	4063000	2879000	2525000	3324000	3583000	1623000	1819000	2200000	1592000	1662000	1743000	1772000	5598-38-9	HMDB0005060	C16525	ko01040//Biosynthesis of unsaturated fatty acids	Lipid metabolism	Metabolism
Com_331_neg	Eucommiol	Terpenoids	NEG	188.105	C9H16O4	7.31	280200	308900	262300	337000	354100	293300	335400	334100	329800	312200	351100	365400	381800	368500	401500	319300	348900	294600	317600	324400	351600	329000	420000	376100	346700	317600	264900	407000	451100	382400	414200	341100	378000	380300	--	--	-	-	-	-
Com_332_neg	2-Hydroxycinnamate	Cinnamic acids and derivatives	NEG	164.047	C9H8O3	6.48	90910	118900	81600	39440	63060	55320	66270	73810	82700	73400	73580	96760	183300	118800	149600	85490	84810	86560	63830	51620	58690	85630	136400	87420	70590	107200	114500	86130	87730	106800	98300	71420	89940	84690	614-60-8	HMDB0002641	C01772	ko01100//Metabolic pathways;ko01110//Biosynthesis of secondary metabolites;ko01120//Microbial metabolism in diverse environments;ko00360//Phenylalanine metabolism	Amino acid metabolism;Global and overview maps	Metabolism
Com_333_neg	Dimethylmalonic acid	Organic Acid And Its Derivatives	NEG	132.042	C5H8O4	0.67	900500	1005000	804500	862800	829000	960000	655000	857400	880000	993900	726000	1052000	1146000	907300	1354000	625400	623000	793700	656400	722600	861200	689100	1049000	1054000	708900	672200	761200	895900	1446000	1181000	722700	797500	759300	716900	595-46-0	HMDB0002001	-	-	-	-
Com_334_neg	1-O-Galloyl-D-glucose	Tannins	NEG	332.074	C13H16O10	4.68	15220	19020	14400	27910	21950	25460	23870	23270	21870	19070	14500	27980	42310	28670	32440	9663	7660	7338	17160	18080	17410	15180	23220	16640	17780	17280	19410	21750	29270	32830	20480	23760	19320	21170	--	--	-	-	-	-
Com_335_neg	Vitexin-2-O-rhaMnoside	Flavonoids	NEG	578.52	C27H30O14	6.411	501100	643000	418700	251100	271100	331100	323900	333100	262400	330500	386300	569500	803300	635900	559800	3660000	3482000	3115000	1370000	1946000	1561000	1661000	3100000	2093000	2183000	2361000	3587000	776300	882900	872300	1309000	1118000	1258000	1161000	--	--	-	-	-	-
Com_336_neg	Isoorientin	Flavones and Flavonols	NEG	448.38	C21H20O11	6.174	106900000	115100000	96910000	81920000	76850000	83890000	61810000	71710000	75990000	78180000	67580000	96250000	71910000	39670000	48910000	110900000	98250000	80510000	43170000	52220000	53720000	39290000	65570000	48910000	54920000	56640000	73040000	38040000	36100000	35800000	63390000	66480000	70070000	69050000	-	HMDB0253666	-	-	-	-
Com_337_neg	Genistin	Isoflavonoids	NEG	432.38	C21H20O10	6.78	118400	126300	95280	77690	74650	90690	55910	101100	95600	119800	119800	133400	144800	86320	80480	190400	209300	145400	76000	123100	100600	91990	157100	114000	125000	132000	171200	48970	48090	46010	135000	98050	93710	107700	529-59-9	HMDB0033988	C09126	ko00943//Isoflavonoid biosynthesis	Biosynthesis of other secondary metabolites	Metabolism
Com_338_neg	Inositol	Alcohols and polyols	NEG	180.16	C6H12O6	0.85	90850	114700	121300	106900	114200	135300	125000	150200	135000	69550	75430	81980	75990	73020	74570	46280	45900	44670	74940	83650	89620	119400	120200	121000	75710	62010	68080	44160	58540	49970	79110	70230	68770	71620	87-89-8	HMDB0000211	C00137	ko01100//Metabolic pathways;ko01110//Biosynthesis of secondary metabolites;ko01120//Microbial metabolism in diverse environments;ko02010//ABC transporters;ko00052//Galactose metabolism;ko00053//Ascorbate and aldarate metabolism;ko00562//Inositol phosphate metabolism;ko04070//Phosphatidylinositol signaling system	Carbohydrate metabolism;Global and overview maps;Membrane transport;Signal transduction	Environmental Information Processing;Metabolism
Com_339_neg	Protocatechuic acid	Phenols And Its Derivatives	NEG	154.12	C7H6O4	4.571	13290	19070	15690	34490	23300	24510	24320	25950	27450	35880	10760	24440	49240	35820	45360	26180	12800	10370	33920	55650	54220	25670	39500	27690	38960	40630	44270	65770	60080	62360	30390	29120	26890	39590	99-50-3	HMDB0001856	C00230	ko01100//Metabolic pathways;ko01110//Biosynthesis of secondary metabolites;ko01120//Microbial metabolism in diverse environments;ko01220//Degradation of aromatic compounds	Global and overview maps	Metabolism
Com_341_neg	GMP	Nucleotide And Its Derivates	NEG	363.221	C10H14N5O8P	0.94	44080	12810	42990	29120	27740	23660	32670	29230	40720	96360	97850	94340	80050	73820	60710	142500	89340	182500	53010	62780	51070	82930	69190	40160	264500	301300	329800	152700	154200	175500	58430	65090	57470	60850	85-32-5	HMDB0001397	C00144	ko01100//Metabolic pathways;ko00230//Purine metabolism	Global and overview maps;Nucleotide metabolism	Metabolism
Com_342_neg	Guanidinoethyl Sulfonate	Organic Acid And Its Derivatives	NEG	167.187	C3H9N3O3S	1.03	27310	34890	24660	30710	28210	37340	13470	17550	11740	23400	8116	18740	23120	16850	31890	16990	18520	18980	21350	27790	33950	22710	30760	27720	20590	16640	14290	34700	40380	33520	20490	26700	19830	21910	543-18-0	HMDB0003584	C01959	ko00430//Taurine and hypotaurine metabolism	Metabolism of other amino acids	Metabolism
Com_343_neg	D-Xylulose	Carbohydrates And Its Derivatives	NEG	150.13	C5H10O5	1.01	1619000	1377000	1295000	1512000	1472000	1276000	917300	1384000	987500	1003000	1055000	1212000	1229000	1277000	1197000	685600	680600	648600	747500	660900	743000	686200	735400	533100	1073000	1149000	1313000	1021000	1013000	1097000	937900	1145000	969200	924500	20750-28-1	HMDB0001644	C00310	ko01100//Metabolic pathways;ko00040//Pentose and glucuronate interconversions	Carbohydrate metabolism;Global and overview maps	Metabolism
Com_344_neg	Oxalacetic acid	Organic Acid And Its Derivatives	NEG	132.07	C4H4O5	0.69	490600	635200	804300	557900	471800	633100	469000	551600	643000	703000	532900	815300	657800	573100	921600	428100	448400	433700	543900	541600	450600	419700	561000	577700	568500	519500	512200	488000	852000	698600	509300	613000	476500	505000	328-42-7	HMDB0000223	C00036	ko01100//Metabolic pathways;ko01110//Biosynthesis of secondary metabolites;ko01120//Microbial metabolism in diverse environments;ko01230//Biosynthesis of amino acids;ko01200//Carbon metabolism;ko01210//2-Oxocarboxylic acid metabolism;ko00630//Glyoxylate and dicarboxylate metabolism;ko00710//Carbon fixation in photosynthetic organisms;ko00010//Glycolysis / Gluconeogenesis;ko00250//Alanine, asparta…	Amino acid metabolism;Carbohydrate metabolism;Energy metabolism;Global and overview maps	Metabolism
Com_345_neg	Heptamethoxyflavone	Flavonoids	NEG	432.42	C22H24O9	7.08	153800	195800	129600	52590	70740	78740	70420	83440	79750	63420	62880	92400	42690	46030	34620	105400	92210	101100	61200	55770	53100	69500	83390	53780	61790	67820	69490	17620	17450	26050	65550	70820	81320	67770	--	--	-	-	-	-
Com_346_neg	L-Fucose	Carbohydrates And Its Derivatives	NEG	164.069	C6H12O5	0.95	26600	32620	20780	32010	32490	37570	31110	43610	39940	42430	26150	62240	57710	48910	46290	35030	24330	21450	48830	47290	43790	59870	76090	45350	52940	59290	38410	49570	50990	41430	50250	55440	42460	46260	6696-41-9	HMDB0000174	C01019	ko01100//Metabolic pathways;ko01120//Microbial metabolism in diverse environments;ko00520//Amino sugar and nucleotide sugar metabolism;ko00051//Fructose and mannose metabolism	Carbohydrate metabolism;Global and overview maps	Metabolism
Com_347_neg	L-Proline	Amino Acid And Derivatives	NEG	115.131	C5H9NO2	0.94	523400	758200	732100	986900	1052000	1071000	2078000	2984000	2069000	7366000	6418000	7527000	9546000	10880000	9883000	672500	460000	492200	870000	776200	887300	2604000	3685000	2857000	7686000	11580000	11490000	8838000	7926000	7791000	6197000	5848000	4733000	5289000	-	HMDB0251528	C00148	ko01100//Metabolic pathways;ko01110//Biosynthesis of secondary metabolites;ko01230//Biosynthesis of amino acids;ko02010//ABC transporters;ko00330//Arginine and proline metabolism;ko00970//Aminoacyl-tRNA biosynthesis;ko00332//Carbapenem biosynthesis	Amino acid metabolism;Biosynthesis of other secondary metabolites;Global and overview maps;Membrane transport;Translation	Environmental Information Processing;Genetic Information Processing;Metabolism
Com_348_neg	Ala-Gln	Amino Acid And Derivatives	NEG	217.22	C8H15N3O4	0.85	36520	19600	21690	29520	62680	49160	56890	62640	62390	27310	69460	65120	136100	105500	109000	96830	101500	85420	53380	44520	72000	50300	51920	35270	99430	96910	132600	120400	85620	110800	84110	83380	91850	71470	-	HMDB0248109	-	-	-	-
Com_349_neg	Thymidine	Nucleotide And Its Derivates	NEG	242.23	C10H14N2O5	4.289	1945	1972	6748	8053	5922	3116	1872	4039	6981	7387	7951	10290	19920	13970	28460	5096	2728	4992	6662	8271	3914	3300	3165	5855	7761	10210	14080	21020	20800	32170	8270	7396	7173	7545	50-89-5	HMDB0000273	C00214	ko01100//Metabolic pathways;ko00240//Pyrimidine metabolism	Global and overview maps;Nucleotide metabolism	Metabolism
Com_350_neg	Chlorogenic acid methyl ester	Alcohols and polyols	NEG	368.111	C17H20O9	5.7	451100	627500	455300	1063000	1226000	1463000	629100	795900	576900	472800	491800	941700	1481000	1508000	1427000	1277000	1300000	1142000	3258000	3589000	2926000	2358000	3285000	2620000	3617000	3701000	4412000	2393000	2870000	2747000	1816000	1716000	1755000	1606000	--	--	-	-	-	-
Com_351_neg	Vitamin C	Vitamins	NEG	176.12	C6H8O6	1.03	216600	225700	222000	151400	138700	222500	195900	251900	220900	265200	137700	305000	298900	335700	385800	178300	242200	191800	261600	237300	187500	281300	331500	214200	384300	422800	434500	307900	343600	335900	267200	305700	282600	265300	50-81-7	HMDB0000044	C00072	ko01100//Metabolic pathways;ko01110//Biosynthesis of secondary metabolites;ko01120//Microbial metabolism in diverse environments;ko00480//Glutathione metabolism;ko00053//Ascorbate and aldarate metabolism	Carbohydrate metabolism;Global and overview maps;Metabolism of other amino acids	Metabolism
Com_352_neg	2,6-Dihydroxypurine	Nucleotide And Its Derivates	NEG	152.11	C5H4N4O2	1.714	34920	36280	24370	93450	127300	113500	65970	96350	84200	31840	27510	32490	111900	100900	112200	29730	28970	22440	105400	115300	132300	52380	93590	103000	53850	58260	74000	66160	217700	94050	69890	84770	73720	65760	69-89-6	HMDB0000292	C00385	ko01100//Metabolic pathways;ko01110//Biosynthesis of secondary metabolites;ko01120//Microbial metabolism in diverse environments;ko00230//Purine metabolism;ko00232//Caffeine metabolism	Biosynthesis of other secondary metabolites;Global and overview maps;Nucleotide metabolism	Metabolism
Com_353_neg	3-Hydroxy-glabrol	Flavonoids	NEG	40.499	C25H28O5	4.82	8021	6979	10480	39640	39330	37320	73170	79900	65110	113300	96430	98730	125400	109900	126000	54719	5786	50547	30370	33220	35750	75060	89570	103200	114000	110800	126900	121500	135800	111200	94510	98270	85150	88900	--	--	-	-	-	-
Com_354_neg	4-Hydroxy-2-Oxoglutaric Acid	Organic Acid And Its Derivatives	NEG	162.098	C5H6O6	0.7	999200	1401000	973900	1113000	953400	1115000	1049000	1113000	991400	1220000	1009000	1408000	1778000	1413000	1734000	861300	928900	775200	916100	1140000	1201000	1117000	1744000	1280000	996700	1008000	1338000	1524000	1621000	1618000	1143000	1259000	1158000	1312000	1187-99-1	HMDB0002070	C01127	ko01100//Metabolic pathways;ko00630//Glyoxylate and dicarboxylate metabolism	Carbohydrate metabolism;Global and overview maps	Metabolism
Com_355_neg	gamma,gamma-Dimethylallyl pyrophosphate	Prenol lipids	NEG	246.092	C5H12O7P2	0.95	9964000	10870000	8625000	12300000	12340000	12130000	19170000	17910000	16310000	22950000	21260000	27090000	37210000	26790000	32880000	7998000	9998000	7651000	14030000	13070000	16630000	25280000	49050000	30610000	25060000	27050000	31020000	27550000	32390000	34740000	21540000	22250000	18460000	21610000	358-72-5	HMDB0001120	C00235	ko01100//Metabolic pathways;ko01110//Biosynthesis of secondary metabolites;ko00908//Zeatin biosynthesis;ko00740//Riboflavin metabolism;ko00900//Terpenoid backbone biosynthesis	Global and overview maps;Metabolism of cofactors and vitamins;Metabolism of terpenoids and polyketides	Metabolism
Com_356_neg	beta-D-Lactose	Carbohydrates And Its Derivatives	NEG	342.297	C12H22O11	1	2229000	2060000	1799000	3820000	3274000	3340000	2194000	2941000	2108000	1707000	1388000	1948000	2980000	2863000	1758000	865000	869400	876500	3233000	3260000	2636000	2504000	3990000	2420000	1635000	2073000	2597000	2399000	2721000	2842000	2616000	2723000	2355000	2316000	5965-66-2	HMDB0041627	-	-	-	-
Com_357_neg	beta-Hydroxyisobutyrate	Organic Acid And Its Derivatives	NEG	104.104	C4H8O3	2.4	6794	5887	4794	4139	3843	5862	8734	6852	7495	16750	13140	20640	27820	25980	28100	4568	7309	6327	5288	4412	5432	10370	11350	9091	28380	34260	28410	16130	19460	16290	13980	14140	10470	12700	--	--	-	-	-	-
Com_358_neg	Neoeriocitrin	Flavanones	NEG	596.542	C27H32O15	6.38	17303	19604	16068	3961	4790	6842	5142	2405	6770	5278	10436	4893	16430	20530	13020	53800	43290	35390	25610	41660	34870	19010	28790	34990	36710	37200	45710	35250	52320	40400	16270	20590	25370	20240	-	HMDB0255521	-	-	-	-
Com_359_neg	4-Hydroxy-3-methoxyphenylglycol sulfate potassium salt	Benzene and substituted derivatives	NEG	302.343	C9H11KO7S	0.92	118500	74150	74730	93890	41750	30360	92880	58950	71330	97480	63420	39000	58650	86250	50150	120500	78330	52340	71520	77510	46400	62340	97690	61100	104300	45340	74550	83250	52820	49880	32920	41260	86410	28560	--	--	-	-	-	-
Com_360_neg	1-Methylguanine	Purines and purine derivatives	NEG	165.153	C6H7N5O	4.09	2088	2484	2486	4306	5374	4360	5324	5098	4828	4205	4498	7525	2821	2308	2526	2302	2221	2418	5172	3771	4539	6427	7030	4638	4469	4185	5760	3338	3538	3455	4307	3825	3901	3660	938-85-2	HMDB0003282	-	-	-	-
Com_361_neg	L-Threonine	Amino Acid And Derivatives	NEG	119.119	C4H9NO3	0.888	303600	329700	283800	419300	442100	513500	523800	567800	601400	343500	384200	486100	624000	498100	533000	369100	363800	322600	407300	408300	401500	629800	584800	479700	438200	463400	447700	493400	396200	436400	429600	393400	460700	448100	72-19-5	HMDB0000167	C00188	ko01100//Metabolic pathways;ko01110//Biosynthesis of secondary metabolites;ko01120//Microbial metabolism in diverse environments;ko01230//Biosynthesis of amino acids;ko02010//ABC transporters;ko00970//Aminoacyl-tRNA biosynthesis;ko00260//Glycine, serine and threonine metabolism;ko00261//Monobactam biosynthesis;ko00860//Porphyrin metabolism;ko00290//Valine, leucine and isoleucine biosynthesis	Amino acid metabolism;Biosynthesis of other secondary metabolites;Global and overview maps;Membrane transport;Metabolism of cofactors and vitamins;Translation	Environmental Information Processing;Genetic Information Processing;Metabolism
Com_362_neg	L-Asparagine	Amino Acid And Derivatives	NEG	132.12	C4H8N2O3	0.843	10270000	9849000	8145000	22760000	21880000	18520000	17700000	23060000	16970000	32610000	28450000	36920000	41770000	40290000	43050000	6946000	6592000	6280000	14120000	14390000	14120000	10040000	14430000	10980000	29880000	32580000	32390000	34230000	41450000	37300000	24710000	25040000	23600000	23470000	-	HMDB0251512	C00152	ko01100//Metabolic pathways;ko01110//Biosynthesis of secondary metabolites;ko01230//Biosynthesis of amino acids;ko00970//Aminoacyl-tRNA biosynthesis;ko00250//Alanine, aspartate and glutamate metabolism;ko00460//Cyanoamino acid metabolism	Amino acid metabolism;Global and overview maps;Metabolism of other amino acids;Translation	Genetic Information Processing;Metabolism
Com_363_neg	L-Glutamine	Amino Acid And Derivatives	NEG	146.14	C5H10N2O3	0.868	22510000	18370000	16160000	1743000	1544000	1500000	1958000	2036000	1747000	1352000	1113000	1523000	3850000	4412000	4452000	40310000	39130000	35820000	1939000	2409000	2864000	3367000	3555000	3023000	3688000	4578000	5779000	4263000	3830000	4395000	7227000	8160000	8180000	7471000	5959-95-5	HMDB0003423	C00064	ko01100//Metabolic pathways;ko01120//Microbial metabolism in diverse environments;ko01230//Biosynthesis of amino acids;ko02010//ABC transporters;ko00230//Purine metabolism;ko00240//Pyrimidine metabolism;ko00970//Aminoacyl-tRNA biosynthesis;ko00630//Glyoxylate and dicarboxylate metabolism;ko00250//Alanine, aspartate and glutamate metabolism;ko00220//Arginine biosynthesis;ko00750//Vitamin B6 metabo…	Amino acid metabolism;Carbohydrate metabolism;Energy metabolism;Global and overview maps;Membrane transport;Metabolism of cofactors and vitamins;Nucleotide metabolism;Translation	Environmental Information Processing;Genetic Information Processing;Metabolism
Com_364_neg	D-Ribulose 1,5-bisphosphate	Carbohydrates And Its Derivatives	NEG	310.09	C5H12O11P2	10.95	76250	130200	81070	35590	41510	50030	54260	62120	66740	57500	59850	90250	40040	30670	33850	57460	48520	48610	43400	45420	58060	59240	91790	87450	45670	48040	43500	24650	24100	35810	58170	48330	41300	44550	-	HMDB0244230	C01182	ko01100//Metabolic pathways;ko01110//Biosynthesis of secondary metabolites;ko01120//Microbial metabolism in diverse environments;ko01200//Carbon metabolism;ko00630//Glyoxylate and dicarboxylate metabolism;ko00710//Carbon fixation in photosynthetic organisms	Carbohydrate metabolism;Energy metabolism;Global and overview maps	Metabolism
Com_365_neg	D-Ribose 5-phophate	Organic Acid And Its Derivatives	NEG	230.11	C5H11O8P	0.89	380900	379340	374000	227700	211600	215800	310400	366800	258300	675400	619200	616300	793600	774600	769600	318220	318230	469500	292100	173900	220700	151200	325000	160200	408200	749100	686100	460600	854000	710700	408100	393200	452600	442800	--	--	-	-	-	-
Com_366_neg	D-Xylulose 5-phosphate	Pentose phosphates	NEG	230.11	C5H11O8P	0.9	1280000	1163000	1022000	845800	729900	760400	1137000	1153000	956800	1254000	1654000	1858000	1574000	2153000	1328000	1427000	1472000	1341000	802900	781300	913600	953600	1217000	863800	1255000	1911000	1381000	1576000	1819000	1621000	1216000	1291000	1268000	1020000	4212-65-1	HMDB0000868	C00231	ko01100//Metabolic pathways;ko01110//Biosynthesis of secondary metabolites;ko01120//Microbial metabolism in diverse environments;ko01230//Biosynthesis of amino acids;ko01200//Carbon metabolism;ko00030//Pentose phosphate pathway;ko00710//Carbon fixation in photosynthetic organisms;ko00040//Pentose and glucuronate interconversions;ko00053//Ascorbate and aldarate metabolism	Carbohydrate metabolism;Energy metabolism;Global and overview maps	Metabolism
Com_367_neg	L-Cysteinesulfinic acid	Organic Acid And Its Derivatives	NEG	153.16	C3H7NO4S	0.88	8269	5092	4856	13790	5549	11310	4804	8500	10160	4670	8633	11480	17100	19620	17980	8582	5781	7222	11690	9982	14610	15420	14430	11720	15630	14830	13600	18970	17840	23340	7626	14060	12020	4480	1115-65-7	HMDB0000996	C00606	ko01100//Metabolic pathways;ko00270//Cysteine and methionine metabolism;ko00430//Taurine and hypotaurine metabolism	Amino acid metabolism;Global and overview maps;Metabolism of other amino acids	Metabolism
Com_368_neg	Glutaric Acid	Organic Acid And Its Derivatives	NEG	132.115	C5H8O4	0.7	666300	1031000	785500	861400	703800	944600	717800	723300	928200	964100	718300	957800	1215000	892300	1517000	588300	443200	685100	724400	535200	946000	726200	1292000	862800	645200	738700	899300	891300	1341000	1240000	882800	808700	834700	798400	110-94-1	HMDB0000661	C00489	ko01100//Metabolic pathways;ko01120//Microbial metabolism in diverse environments;ko00310//Lysine degradation;ko00071//Fatty acid degradation	Amino acid metabolism;Global and overview maps;Lipid metabolism	Metabolism
Com_369_neg	Linolelaidic Acid (C18:2N6T)	Fatty Acyls	NEG	280.445	C18H32O2	15.16	32040	30640	39350	30480	32610	21040	37040	39920	22730	23180	31620	28240	35540	17670	140100	26020	33400	20640	36520	53780	47930	39190	23680	40770	46510	33950	36120	41380	26520	20410	27570	40350	30600	34520	--	--	-	-	-	-
Com_370_neg	Hydroumbellic acid	Phenylpropanoids and polyketides	NEG	182.17	C9H10O4	6.14	235000	359550	754000	161700	440200	533900	332600	299000	435000	207200	308180	149700	605600	586200	557600	564000	247900	207900	258300	302600	103200	318500	318300	352600	233500	423300	331650	320400	326600	358320	421500	272300	257700	532900	--	--	-	-	-	-
Com_371_neg	3-Dehydroshikimic acid	Organic Acid And Its Derivatives	NEG	172.14	C7H8O5	18.33	136200	134300	134600	140400	135300	131400	138200	143900	131300	142200	143600	135800	137500	136900	146200	133300	129100	130600	136300	135800	145000	132600	131700	122300	130400	137200	126000	124400	122400	134000	123700	133500	136200	142800	-	HMDB0304122	-	-	-	-
Com_372_neg	Fumaric Acid	Tca Cycle	NEG	116.072	C4H4O4	1.11	270400	533200	446500	1046000	1034000	1101000	976900	1031000	968100	738900	619400	747500	1464000	1070000	1373000	446800	568800	456100	1236000	1123000	1384000	1609000	2038000	2152000	854500	896700	974300	781200	1055000	937600	1013000	997400	915100	874700	110-17-8	HMDB0000134	C00122	ko01100//Metabolic pathways;ko01110//Biosynthesis of secondary metabolites;ko01120//Microbial metabolism in diverse environments;ko01200//Carbon metabolism;ko00760//Nicotinate and nicotinamide metabolism;ko00250//Alanine, aspartate and glutamate metabolism;ko00020//Citrate cycle (TCA cycle);ko00220//Arginine biosynthesis;ko01220//Degradation of aromatic compounds;ko00350//Tyrosine metabolism;ko00…	Amino acid metabolism;Carbohydrate metabolism;Energy metabolism;Global and overview maps;Metabolism of cofactors and vitamins	Metabolism
Com_373_neg	Abscisic Acid	Phytohormones	NEG	264.32	C15H20O4	8.13	2028	6208	4306	26610	35030	37880	35380	33900	41490	15330	16600	27150	26200	17680	16360	1614	4891	2870	49520	46390	45870	79180	131800	82920	26640	37610	40000	23610	27910	24190	24710	29360	30170	31050	-	HMDB0243505	C06082	ko01100//Metabolic pathways;ko01110//Biosynthesis of secondary metabolites;ko00906//Carotenoid biosynthesis;ko04075//Plant hormone signal transduction	Global and overview maps;Metabolism of terpenoids and polyketides;Signal transduction	Environmental Information Processing;Metabolism
Com_374_neg	Cinene	Terpenoids	NEG	136.23	C10H16	18.26	557900	561600	559900	503600	544200	551700	570000	273600	596900	238100	230000	263700	251600	231700	559900	258500	576200	520800	521500	260300	568600	486000	600000	567300	536000	569600	599800	553000	563500	570200	588600	249600	540000	543600	--	--	-	-	-	-
Com_375_neg	5-Hydroxymethyluracil	Pyrimidines and pyrimidine derivatives	NEG	142.113	C5H6N2O3	0.96	13670	7646	14660	7571	25140	11180	19970	20960	16970	22740	11570	20270	27800	13960	22290	18050	13460	15600	9882	25190	16910	22700	16300	11980	8892	10670	10870	15060	44760	25270	11200	16860	28520	33960	4433-40-3	HMDB0000469	-	-	-	-
Com_376_neg	alpha-Ketoglutaric acid	Tca Cycle	NEG	146.098	C5H6O5	0.87	4643000	4190000	3801000	383000	350500	328400	435100	450700	431300	294500	215000	283600	763600	977300	923400	6969000	6936000	7548000	405400	516500	597000	693100	696600	605300	763400	910900	1084000	886700	788400	754800	1597000	1522000	1621000	1631000	328-50-7	HMDB0000208	C00026	ko01100//Metabolic pathways;ko01110//Biosynthesis of secondary metabolites;ko01120//Microbial metabolism in diverse environments;ko01230//Biosynthesis of amino acids;ko01200//Carbon metabolism;ko01210//2-Oxocarboxylic acid metabolism;ko00310//Lysine degradation;ko00630//Glyoxylate and dicarboxylate metabolism;ko00250//Alanine, aspartate and glutamate metabolism;ko00040//Pentose and glucuronate in…	Amino acid metabolism;Carbohydrate metabolism;Global and overview maps;Metabolism of other amino acids	Metabolism
Com_377_neg	3-Methyl-2-Oxobutanoic Acid	Organic Acid And Its Derivatives	NEG	116.115	C5H8O3	1.05	78210	74960	64380	64060	49640	62140	57840	68700	54340	58570	47380	47640	30500	31210	14390	57710	72320	65890	54200	56450	34100	36480	68630	18900	70950	34740	46560	20780	58081	21590	57810	18530	59220	37770	556-24-1	HMDB0030027	C00141	ko01100//Metabolic pathways;ko01110//Biosynthesis of secondary metabolites;ko01230//Biosynthesis of amino acids;ko01210//2-Oxocarboxylic acid metabolism;ko00770//Pantothenate and CoA biosynthesis;ko00966//Glucosinolate biosynthesis;ko00280//Valine, leucine and isoleucine degradation;ko00290//Valine, leucine and isoleucine biosynthesis	Amino acid metabolism;Biosynthesis of other secondary metabolites;Global and overview maps;Metabolism of cofactors and vitamins	Metabolism
Com_378_neg	Rutin	Flavones and Flavonols	NEG	610.518	C27H30O16	6.451	230500	270600	202200	712000	879700	1000000	469600	537800	383300	304900	249900	491300	442400	420200	484200	49400	30980	31830	921100	1190000	1006000	704600	1302000	1274000	100100	103100	114200	2353000	2501000	3554000	675900	612100	726900	575400	153-18-4	HMDB0003249	C05625	ko01100//Metabolic pathways;ko01110//Biosynthesis of secondary metabolites;ko00944//Flavone and flavonol biosynthesis	Biosynthesis of other secondary metabolites;Global and overview maps	Metabolism
Com_379_neg	Rhoifolin	Flavonoids	NEG	578.52	C27H30O14	6.94	1606000	1727000	1215000	1378000	1441000	1250000	1064000	1212000	933600	1398000	1156000	2733000	2507000	3413000	3858000	9045000	11780000	9541000	7929000	10830000	7316000	8707000	18290000	11410000	12120000	10860000	19100000	7269000	7137000	9032000	6007000	5297000	5110000	6454000	-	HMDB0303149	C12627	ko00944//Flavone and flavonol biosynthesis	Biosynthesis of other secondary metabolites	Metabolism
Com_380_neg	Vitexin	Flavones and Flavonols	NEG	432.38	C21H20O10	6.559	32840000	33880000	27280000	20540000	23180000	26230000	22910000	25840000	23840000	32360000	28670000	44950000	33740000	26450000	26170000	49040000	57880000	43310000	25550000	33300000	28230000	36280000	53120000	34730000	37980000	40670000	50060000	14820000	14900000	15600000	32520000	28970000	26730000	30190000	-	HMDB0259858	C01460	ko00944//Flavone and flavonol biosynthesis;ko00941//Flavonoid biosynthesis	Biosynthesis of other secondary metabolites	Metabolism
Com_381_neg	Isorhoifolin	Flavonoids	NEG	578.52	C27H30O14	6.84	2029000	1847000	1226000	1805000	1581000	1522000	1084000	1297000	1065000	1408000	1419000	2925000	3350000	3898000	4488000	12330000	14900000	12640000	10110000	10680000	10080000	11170000	18070000	11140000	13780000	14040000	19910000	9109000	8601000	10590000	7885000	7912000	7215000	7830000	552-57-8	HMDB0037349	-	-	-	-
Com_382_neg	Luteolin 7-O-glucoside	Flavonoids	NEG	448.38	C21H20O11	6.664	3264000	4070000	2787000	2118000	2070000	1944000	1173000	1600000	1607000	1548000	1466000	2664000	1573000	900600	498100	2884000	3066000	2158000	3860000	6539000	4735000	2304000	3203000	3014000	3334000	2791000	4176000	1918000	2187000	2320000	2387000	2263000	2586000	2519000	5373-11-05	HMDB0035588	C03951	ko00944//Flavone and flavonol biosynthesis	Biosynthesis of other secondary metabolites	Metabolism
Com_383_neg	Citramalate	Organic Acid And Its Derivatives	NEG	148	C5H8O5	2.04	8966	12210	14040	4580	8013	6996	12020	8324	4952	7574	2888	3154	21370	13350	15230	20860	23660	18190	9870	10920	13720	12580	25560	24030	6748	9412	5808	15430	20160	19400	10290	13700	10770	11350	597-44-4	HMDB0000426	-	-	-	-
Com_384_neg	UDP	Nucleotide And Its Derivates	NEG	404.16	C9H14N2O12P2	0.7	1103000	2128000	1082000	1526000	1264000	1540000	872200	838800	1103000	2045000	1045000	2098000	2919000	2002000	3363000	617200	558700	406200	882000	764500	1188000	833200	2032000	1419000	751000	837100	1005000	1362000	2461000	2456000	1205000	1328000	1397000	1119000	58-98-0	HMDB0000295	C00015	ko01100//Metabolic pathways;ko00240//Pyrimidine metabolism;ko00908//Zeatin biosynthesis	Global and overview maps;Metabolism of terpenoids and polyketides;Nucleotide metabolism	Metabolism
Com_385_neg	12,13-EODE	Fatty Acyls	NEG	296	C18H32O3	12.67	351100	385300	234900	153900	167100	168300	159100	205000	195300	100100	94500	159700	216000	147000	305200	153700	164400	117700	118800	149300	160900	173000	312000	237200	100000	90420	99950	99440	122700	144100	154800	153800	160600	152700	--	--	-	-	-	-
Com_386_neg	13-HPODE	Fatty Acyls	NEG	312.1	C18H32O4	11.45	53610	138900	70020	35790	40490	33840	45330	31030	55850	22440	25070	31640	39050	21160	31450	80290	99310	33910	368800	489200	484700	225800	485700	232700	43510	53440	56750	72930	84190	75110	110400	107900	99580	105800	33964-75-9	HMDB0003871	C04717	ko01100//Metabolic pathways;ko00591//Linoleic acid metabolism	Global and overview maps;Lipid metabolism	Metabolism
Com_387_neg	13-HOTrE(r)	Fatty Acyls	NEG	294	C18H30O3	11.36	586900	576600	559400	548400	563200	523400	530000	582800	543200	552700	594000	586800	572100	588300	572800	557700	531000	566700	528300	539400	546400	538700	523200	563200	544400	533200	524700	548400	534300	534600	538000	533900	571700	562100	--	--	-	-	-	-
Com_388_neg	Lauric Acid	Fatty Acyls	NEG	200.32	C12H24O2	7.28	44680	34790	49510	47450	36090	49290	44490	42020	54400	59170	46180	48730	41610	53690	48150	48010	39610	42810	55180	32670	38310	34100	51640	33310	56790	36780	41520	49500	228500	93770	50520	35990	38830	45420	-	HMDB0303348	C02679	ko01100//Metabolic pathways;ko01110//Biosynthesis of secondary metabolites;ko00061//Fatty acid biosynthesis	Global and overview maps;Lipid metabolism	Metabolism
Com_389_neg	Esculetin	Coumarins and derivatives	NEG	178.14	C9H6O4	5.832	49510	38990	41060	13850	16570	11220	16360	4119	6802	12961	8334	6628	6496	4442	21150	69840	79070	74770	37200	27500	20260	13270	16460	26760	8305	13610	24330	6734	17039	17252	22930	17440	18030	28640	305-01-1	HMDB0030819	C09263	ko01110//Biosynthesis of secondary metabolites	Global and overview maps	Metabolism
Com_390_neg	Gluconolactone	Carbohydrates And Its Derivatives	NEG	178.14	C6H10O6	1.02	51920	60830	46370	80010	76020	68990	47470	60260	56770	78500	60590	86370	137600	124300	127400	56480	68040	49290	52650	73350	74560	96900	91460	71980	100300	90460	110000	71040	119700	120500	65820	81340	73990	89370	90-80-2	HMDB0000150	C00198	ko01100//Metabolic pathways;ko01110//Biosynthesis of secondary metabolites;ko01120//Microbial metabolism in diverse environments;ko01200//Carbon metabolism;ko00030//Pentose phosphate pathway	Carbohydrate metabolism;Global and overview maps	Metabolism
Com_391_neg	DL-Panthenol	Fatty Acyls	NEG	205.25	C9H19NO4	4.647	7624	5993	6605	5864	9499	7930	6545	5351	3516	13690	11740	27180	20840	17390	26770	7628	5802	5808	2968	3960	5887	2181	7111	4111	39380	46630	40150	23850	19200	20510	13910	13340	13720	12830	-	HMDB0304820	-	-	-	-
Com_392_neg	Pyridoxine 5'-phosphate	Vitamins	NEG	249.04	C8H12NO6P	0.89	126700	128200	107700	105300	121300	110500	136000	155100	126300	143100	140600	142800	151100	107200	204900	128200	117400	110700	109600	115300	98000	133000	141400	130100	127800	146400	126200	136700	132600	126000	126800	130200	137600	130100	447-05-2	HMDB0001319	C00627	ko01100//Metabolic pathways;ko00750//Vitamin B6 metabolism	Global and overview maps;Metabolism of cofactors and vitamins	Metabolism
Com_393_neg	Gingerglycolipid B	Glycerolipids	NEG	678.805	C33H58O14	12.02	17840	24680	28310	28860	28960	45870	34940	37050	29220	40290	23090	48780	32900	23370	34010	20690	17330	17560	27290	47520	31240	27460	36970	34510	37990	46790	44050	24700	25790	27930	25580	28800	32140	27110	88168-90-5	HMDB0041094	-	-	-	-
Com_394_neg	Scutellarin	Flavonoids	NEG	462.36	C21H18O12	6.59	73770	96990	63160	255000	240900	218100	245100	174500	364800	125000	101300	62480	295500	293000	220000	1421000	1292000	817100	5221000	7383000	5466000	1375000	2390000	2903000	3991000	3690000	5310000	3874000	4289000	4359000	1878000	1683000	1834000	1708000	--	--	-	-	-	-
Com_395_neg	Rutin hydrate	Flavonoids	NEG	610.52	C27H30O16.xH2O	6.36	125700	164200	151000	386900	483800	695100	280300	339600	217200	176500	140000	302000	288900	330200	287200	19180	16050	16770	604600	803000	579900	518200	941300	838500	53530	45050	69070	1334000	1742000	2317000	397200	352100	449600	446800	--	--	-	-	-	-
Com_396_neg	L-Rhamnose	Carbohydrates And Its Derivatives	NEG	164.16	C6H12O5	0.98	36960	27140	34250	35840	26360	33200	41400	42090	28370	37400	35320	38880	37810	35180	46710	38680	32690	29220	26030	47060	39720	45400	51770	38370	39790	45890	42480	42800	36650	33120	44150	31220	50460	36660	3615-41-6	HMDB0000849	C00507	ko01100//Metabolic pathways;ko01120//Microbial metabolism in diverse environments;ko00051//Fructose and mannose metabolism	Carbohydrate metabolism;Global and overview maps	Metabolism
Com_397_neg	Licochalcone A	Chalcones and dihydrochalcones	NEG	338.4	C21H22O4	11.087	14160	12070	11950	17190	13650	17070	8276	13790	13710	6965	12910	10090	9893	5181	13890	11180	8319	7695	6722	10770	9722	8949	7049	7623	3478	4700	4211	7471	3944	8374	8860	10300	9364	6487	58749-22-7	HMDB0029514	-	-	-	-
Com_398_neg	5-Phenyl-2,4-pentadienoic acid	Benzene and substituted derivatives	NEG	174.2	C11H10O2	10.04	38346	44845	36336	59370	17600	38850	41060	33460	41770	33380	12870	43870	140000	65060	134500	1917	42604	4973	57960	43270	18820	30660	104300	74590	51690	33530	91210	97590	118600	138900	45170	23280	46660	57980	--	--	-	-	-	-
Com_399_neg	Rehmannioside A	Terpene	NEG	524.476	C21H32O15	5.57	31660	51410	35860	60740	51110	63690	56770	51930	55230	68930	43970	75740	77870	53340	63270	9724	9466	6577	16430	11600	22780	18150	27530	30970	14170	10960	14660	44100	67900	74710	42610	31940	26800	37960	--	--	-	-	-	-
Com_400_neg	N alpha-Acetyl-L-glutamine	Amino Acid And Derivatives	NEG	188.08	C7H12N2O4	7.4	1346000	1352000	1149000	1334000	1455000	1308000	1313000	1331000	1415000	1333000	1409000	1519000	1579000	1627000	1712000	1245000	1224000	1298000	1268000	1303000	1349000	1325000	1729000	1644000	1489000	1383000	1545000	1725000	1746000	1490000	1305000	1433000	1540000	1395000	--	--	-	-	-	-
Com_401_neg	Isomaltulose	Carbohydrates And Its Derivatives	NEG	342.116	C12H22O11	0.97	16670000	12550000	13500000	35300000	25740000	34520000	18900000	23810000	13810000	14720000	9879000	17370000	21860000	23500000	15330000	6968000	6568000	7142000	23740000	27600000	23660000	21240000	40180000	23690000	16040000	17530000	16700000	18050000	20830000	23390000	20340000	21530000	17680000	21620000	--	--	-	-	-	-
Com_402_neg	4-Methoxycinnamic acid	Cinnamic acids and derivatives	NEG	178	C10H10O3	8.56	13132	6425	17099	11371	4494	15698	4618	14978	3903	2803	3168	3742	182700	29540	9435	8552	8933	10449	11572	12099	11575	11556	5165	20637	20618	3896	19832	13174	3424	15480	8725	6493	5968	6769	943-89-5	HMDB0002040	-	-	-	-
Com_403_neg	Diosmetin	Flavones and Flavonols	NEG	300.26	C16H12O6	8.911	133500	205400	154500	74560	107600	145500	152600	185900	170600	233200	197200	259400	104500	78820	169000	169400	182600	134200	132200	137600	128700	91430	186100	159900	136200	123900	159000	175800	134700	154400	154500	150600	139700	146600	520-34-3	HMDB0029676	-	-	-	-
Com_404_neg	Geniposidic acid	Terpenoids	NEG	374.34	C16H22O10	4.615	14640	23260	13270	16880	16420	20030	17680	15410	10700	12030	11640	21000	18000	12110	9977	3330	4948	3297	4156	5100	6206	5116	9045	8143	4407	4659	7207	3918	8365	7215	10150	8000	12540	9007	27741-01-1	HMDB0034942	C11673	ko01110//Biosynthesis of secondary metabolites;ko00902//Monoterpenoid biosynthesis	Global and overview maps;Metabolism of terpenoids and polyketides	Metabolism
Com_405_neg	Salidroside	Glycosides	NEG	300.304	C14H20O7	5.089	8958	7228	5996	6144	6758	9518	9556	7927	9939	12140	7232	18540	25260	8960	16880	8120	8377	3888	8515	12540	12810	11900	18700	21890	17570	26460	26020	19650	25590	35370	12710	18430	10650	9389	-	HMDB0257463	C06046	ko01100//Metabolic pathways;ko00350//Tyrosine metabolism	Amino acid metabolism;Global and overview maps	Metabolism
Com_406_neg	Guanosine	Nucleotide And Its Derivates	NEG	283.24	C10H13N5O5	2.772	9355	13470	5637	4876	6909	7248	7879	6696	11450	17450	10640	35280	17480	10620	15520	13300	12640	9897	6169	8722	7333	14290	30920	22800	32280	48220	54340	11180	15820	16590	14080	13430	15940	13710	118-00-3	HMDB0000133	C00387	ko01100//Metabolic pathways;ko02010//ABC transporters;ko00230//Purine metabolism	Global and overview maps;Membrane transport;Nucleotide metabolism	Environmental Information Processing;Metabolism
Com_407_neg	Lariciresinol-4'-O-glucoside	Lignans	NEG	522.211	C26H34O11	6.56	41840	46880	35260	15540	18160	27740	23330	29060	36270	39910	37050	46000	33510	28530	28060	29820	47880	32200	40580	31930	39210	34860	74970	53990	55490	42460	48130	36840	44150	43130	33480	19800	29450	34410	--	--	-	-	-	-
Com_408_neg	9S-Hydroxy-10E,12Z-octadecadienoic acid	Fatty Acyls	NEG	296.235	C18H32O3	12.61	350200	420500	248500	144300	150800	165000	155000	202300	191700	98200	98670	164700	209900	144800	309600	152500	166200	112500	118500	141700	160600	182100	320000	227000	92980	90020	100900	101000	125500	132800	152400	142600	154600	160400	73543-67-6	HMDB0004670	C14767	ko00591//Linoleic acid metabolism	Lipid metabolism	Metabolism
Com_409_neg	Sibiricose A3	Phenolic acids	NEG	462.137	C19H26O13	5	4247	9662	5538	5320	7360	5180	1269	2792	2746	15464	13141	5388	14160	16160	9614	16820	13140	14090	15710	22650	23060	36620	84150	50110	17970	22620	26740	32180	49800	51830	16620	11420	15270	13150	--	--	-	-	-	-
Com_410_neg	(7S,8S)-DiHODE	Fatty Acyls	NEG	312.23	C18H32O4	1.3	31390	53320	25110	63100	64520	90890	112700	97310	115400	113500	69930	134000	188500	203400	189000	44190	61490	32750	54430	106900	81070	103200	190000	161800	162000	176400	210200	178200	245200	152800	150700	99600	125300	112300	--	--	-	-	-	-
Com_411_neg	Spinosin	Flavones and Flavonols	NEG	608.545	C28H32O15	6.418	28370	34340	16180	17520	18450	34790	16760	17250	22210	13230	15030	30480	8801	21513	13830	44880	44690	55740	37780	46250	54880	34380	73020	43560	21820	33160	27560	20991	20408	4210	28040	15820	25100	18840	-	HMDB0258422	-	-	-	-
Com_412_neg	Neochlorogenic acid	Polyphenol	NEG	354.309	C16H18O9	4.879	18610000	22360000	14900000	10420000	12230000	20370000	11590000	12270000	12870000	9122000	7473000	13610000	20900000	15250000	18200000	34300000	34740000	28720000	26320000	29260000	22330000	22130000	32930000	23170000	30280000	34330000	43700000	10910000	11510000	12450000	20020000	20180000	18800000	18440000	-	HMDB0240477	-	-	-	-
Com_413_neg	Astragalin	Flavones and Flavonols	NEG	448.38	C21H20O11	7.24	1378000	1735000	1561000	825500	934000	1256000	966500	1041000	1235000	1468000	1368000	1866000	840900	585300	798200	421332	484262	481878	181200	149100	234700	198000	336600	495000	100000	58190	116400	259400	348700	452200	739000	644700	702300	668200	480-10-4	HMDB0037429	C12249	ko01110//Biosynthesis of secondary metabolites;ko00944//Flavone and flavonol biosynthesis	Biosynthesis of other secondary metabolites;Global and overview maps	Metabolism
Com_414_neg	Cynarin	Organic Acid And Its Derivatives	NEG	516.458	C25H24O12	6.89	53030	36170	45750	72240	68130	91300	44790	49200	55040	51270	43340	68190	106200	105600	88150	110400	135300	102200	176100	133800	124700	109800	136900	100400	224500	201900	255800	91690	113700	116200	99000	82090	109900	103800	30964-13-7	HMDB0030093	-	-	-	-
Com_415_neg	D-Xylonic acid	Organic Acid And Its Derivatives	NEG	166.048	C5H10O6	0.9	3581000	3897000	2897000	4043000	4125000	4516000	4478000	4872000	4347000	5546000	4692000	5777000	9135000	6866000	8011000	3683000	4067000	3545000	3522000	4054000	3910000	5724000	7676000	6210000	5833000	6429000	7228000	6459000	6857000	6769000	5533000	5433000	5255000	5045000	-	HMDB0242170	-	-	-	-
Com_416_neg	Pantetheine	Vitamins	NEG	278.13	C11H22N2O4S	5.84	12530	15430	11460	9453	18600	12650	22020	26690	24770	11950	12250	18300	26230	15500	16580	9501	9502	5535	12660	16010	16820	17260	33620	25940	21770	21050	25890	20850	20420	36410	20900	13010	16300	14170	496-65-1	HMDB0003426	C00831	ko01100//Metabolic pathways;ko01110//Biosynthesis of secondary metabolites;ko00770//Pantothenate and CoA biosynthesis;ko00332//Carbapenem biosynthesis	Biosynthesis of other secondary metabolites;Global and overview maps;Metabolism of cofactors and vitamins	Metabolism
Com_417_neg	4-Ethylphenol	Benzene and substituted derivatives	NEG	122.16	C8H10O	7.42	209400	255600	186000	217100	202000	188300	217000	202700	212200	237400	160500	238800	167200	227300	222000	185600	234300	234500	192700	195400	126200	223500	234700	185000	192300	216800	173200	217400	197000	156700	262700	224500	287200	206600	123-07-9	HMDB0029306	C13637	ko01120//Microbial metabolism in diverse environments	Global and overview maps	Metabolism
Com_418_neg	4,5-DCQA Isochlorogenic acid C	Phenols And Its Derivatives	NEG	516.458	C25H24O12	6.93	27580	39208	18210	36930	45600	57120	29830	46756	38280	42141	41808	48460	81520	61100	66820	69400	60830	68990	85600	75950	60190	44600	100700	68120	108400	111000	119000	44870	78100	58970	60560	39840	43890	49540	--	--	-	-	-	-
Com_419_neg	5-O-p-Coumaroylquinic acid	Cinnamic acids and derivatives	NEG	338	C16H18O8	5.4	613200	850600	634300	374300	452600	559600	431300	499200	429300	501200	388300	719700	576400	463300	526700	508800	501600	399800	436500	560900	441100	492800	785600	516600	526800	613700	700700	175900	185000	218300	489600	479400	499800	457100	--	--	-	-	-	-
Com_420_neg	Chrysoeriol O-acetylhexoside	Flavonoids	NEG	504.1	C24H24O12	4.81	41930	48980	32570	48750	41650	50400	9692	15680	9501	6603	5280	8233	3310	5762	4964	41140	41400	39490	48600	60590	58430	18000	31180	17020	6013	17170	11130	4018	4971	9202	24950	22460	20080	18180	--	--	-	-	-	-
Com_421_neg	D-Erythrose 4-phosphate	Carbohydrates And Its Derivatives	NEG	200.084	C4H9O7P	1.08	465200	431200	430700	284200	336400	303400	400000	378500	365200	258000	294300	320100	363800	287000	197300	405000	374700	406200	257300	268700	273100	299800	424800	315400	242100	277400	278400	250100	289200	247500	325800	272300	342700	308900	585-18-2	HMDB0001321	C00279	ko01100//Metabolic pathways;ko01110//Biosynthesis of secondary metabolites;ko01120//Microbial metabolism in diverse environments;ko01230//Biosynthesis of amino acids;ko01200//Carbon metabolism;ko00030//Pentose phosphate pathway;ko00710//Carbon fixation in photosynthetic organisms;ko00400//Phenylalanine, tyrosine and tryptophan biosynthesis;ko00750//Vitamin B6 metabolism	Amino acid metabolism;Carbohydrate metabolism;Energy metabolism;Global and overview maps;Metabolism of cofactors and vitamins	Metabolism
Com_422_neg	D-Fructose 1,6-bisphosphate	Sugar Acids And Its Derivatives	NEG	340.116	C6H14O12P2	0.88	763500	946000	934700	748400	812500	716500	639700	783400	840000	967400	838100	984000	571900	365200	719600	901900	966000	820100	683200	846400	753100	634900	859800	939800	673400	679500	808700	599400	688900	532900	800400	758600	702500	749100	34693-15-7	HMDB0001058	C00354	ko01100//Metabolic pathways;ko01110//Biosynthesis of secondary metabolites;ko01120//Microbial metabolism in diverse environments;ko01200//Carbon metabolism;ko00710//Carbon fixation in photosynthetic organisms;ko00400//Phenylalanine, tyrosine and tryptophan biosynthesis	Amino acid metabolism;Energy metabolism;Global and overview maps	Metabolism
Com_423_neg	Guanosine 5'-triphosphate	Nucleotide And Its Derivates	NEG	523.18	C10H16N5O14P3	0.9	6040	17320	8339	10530	12400	15010	16120	6572	10970	10620	11160	9585	11860	9735	20470	12500	6591	17470	8812	16540	14830	3918	13250	7676	10430	8981	12060	11450	9171	5030	17800	6480	13870	10080	1986-01-01	HMDB0001273	C00044	ko01100//Metabolic pathways;ko01110//Biosynthesis of secondary metabolites;ko00230//Purine metabolism;ko04122//Sulfur relay system;ko00740//Riboflavin metabolism;ko00790//Folate biosynthesis;ko04140//Autophagy - animal;ko04144//Endocytosis	Folding, sorting and degradation;Global and overview maps;Metabolism of cofactors and vitamins;Nucleotide metabolism;Transport and catabolism	Cellular Processes;Genetic Information Processing;Metabolism
Com_424_neg	Lactic acid	Organic Acid And Its Derivatives	NEG	90.078	C3H6O3	1.48	235900	230100	241400	115100	119100	101700	92340	242800	117500	83460	131000	91300	197900	253700	261200	143000	80250	78810	191500	153100	157000	104200	202100	132500	161800	197500	195700	224300	277900	246500	161200	208700	161000	145000	10326-41-7	HMDB0001311	-	-	-	-
Com_425_neg	6-Phosphogluconic acid	Carbohydrates And Its Derivatives	NEG	276.135	C6H13O10P	0.91	69430	68640	67930	64530	72350	70010	87880	87790	104700	94470	88280	90800	112400	82070	71580	65890	64810	63390	79260	59570	68250	89940	152800	86290	67830	66210	69290	68480	85420	94680	74850	65810	72000	65430	921-62-0	HMDB0001316	C00345	ko01100//Metabolic pathways;ko01110//Biosynthesis of secondary metabolites;ko01120//Microbial metabolism in diverse environments;ko01200//Carbon metabolism;ko00030//Pentose phosphate pathway	Carbohydrate metabolism;Global and overview maps	Metabolism
Com_426_neg	2,5-Dihydroxybenzoic acid	Benzoic acids and derivatives	NEG	154.12	C7H6O4	5.44	11050	30480	16570	14870	8716	16880	17810	11930	12160	17150	3942	17510	17350	20330	25200	17220	15120	15430	16320	18000	13070	25360	28070	12870	20130	20560	30690	35680	43570	43150	25750	24200	20220	26460	490-79-9	HMDB0000152	C00628	ko01100//Metabolic pathways;ko01120//Microbial metabolism in diverse environments;ko00350//Tyrosine metabolism	Amino acid metabolism;Global and overview maps	Metabolism
Com_427_neg	D-Arabinose 5-phosphate	Pentose phosphates	NEG	230.11	C5H11O8P	0.9	1538000	1293000	1238000	994000	912400	841000	1344000	1276000	1114000	1937000	1893000	2344000	3347000	2204000	1730000	1735000	1701000	1550000	987800	799500	1081000	1142000	1387000	948800	2115000	2098000	1768000	1881000	2764000	2391000	1205000	1562000	1437000	1648000	13137-52-5	HMDB0011734	C01112	ko01100//Metabolic pathways	Global and overview maps	Metabolism
Com_428_neg	dUMP	Nucleotide And Its Derivates	NEG	308.182	C9H13N2O8P	0.92	310400	298700	323900	144400	161800	160400	185200	198900	143400	199800	238600	239500	237300	189900	194700	254000	242200	230400	117300	122000	101900	164200	217700	207500	173300	187500	170400	105300	147900	139200	184100	208000	222400	190100	964-26-1	HMDB0001409	C00365	ko01100//Metabolic pathways;ko00240//Pyrimidine metabolism	Global and overview maps;Nucleotide metabolism	Metabolism
Com_429_neg	Deoxyribose 5-Phosphate	Pentose phosphates	NEG	235.084	C5H11O7P	0.82	7807	8074	6315	7362	8960	10770	11140	9041	13970	11740	12710	14150	10530	9391	9679	10130	9250	8378	9685	11248	9773	17170	7211	12636	10100	12850	14690	8962	8397	8747	10270	15510	12430	9859	102916-66-5	HMDB0001031	C00673	ko01100//Metabolic pathways;ko00030//Pentose phosphate pathway	Carbohydrate metabolism;Global and overview maps	Metabolism
Com_430_neg	Licoagroside D	Alcohols and polyols	NEG	448.426	C22H24O10	11.44	11780	8372	7853	8086	4348	9978	2538	5194	3957	5314	19890	13260	17990	19210	2409	16070	10930	22850	9063	7265	8076	15880	20283	2806	29660	21920	30680	42040	27590	34450	8371	9685	7964	6690	--	--	-	-	-	-
Com_431_neg	D-Galactonic acid	Organic Acid And Its Derivatives	NEG	196.155	C6H12O7	0.92	3077000	2999000	2167000	3302000	2710000	2847000	2190000	3094000	2107000	3623000	3199000	3490000	7263000	5819000	6341000	2838000	2907000	2689000	3129000	2599000	2694000	3252000	4576000	3279000	5055000	4847000	6808000	3896000	4488000	4413000	3640000	3758000	3847000	3440000	-	HMDB0253886	C00880	ko01100//Metabolic pathways;ko01120//Microbial metabolism in diverse environments;ko00052//Galactose metabolism	Carbohydrate metabolism;Global and overview maps	Metabolism
Com_432_neg	Isovanillic acid	Benzoic acids and derivatives	NEG	168.15	C8H8O4	6.1	56120	82200	70000	44450	54580	67600	65470	91400	78130	84650	75980	86990	117200	67820	86990	58720	77000	60720	51150	66540	60120	73320	87590	83650	43130	40380	51410	56580	82910	101300	74090	68230	105400	72100	-	HMDB0060003	-	-	-	-
Com_433_neg	Hydroferulic acid	Phenylpropanoids and polyketides	NEG	196.2	C10H12O4	6.74	7897	9145	4157	7771	6473	5088	7554	11650	3275	6206	9554	13080	18360	9713	8349	7533	12560	10540	12100	10430	7239	12020	26510	23140	10490	19500	9302	11310	18180	18510	9103	10150	7374	7752	--	--	-	-	-	-
Com_434_neg	Syringetin	Flavones and Flavonols	NEG	346.069	C17H14O8	7.87	19476	26767	19771	15137	19252	24275	23016	21018	20026	20743	18740	34477	10750	13410	12500	31550	23280	18970	52930	31370	19970	21690	73990	42210	41600	58170	42750	20700	25650	36750	19320	25040	16110	21090	-	HMDB0304565	C11620	ko01110//Biosynthesis of secondary metabolites;ko00944//Flavone and flavonol biosynthesis	Biosynthesis of other secondary metabolites;Global and overview maps	Metabolism
Com_435_neg	Fructose	Carbohydrates And Its Derivatives	NEG	180.16	C6H12O6	0.92	266400	297000	244600	471500	372100	517600	404200	532700	406500	382800	451100	317200	505800	446100	403400	228900	365100	272700	339100	245300	387900	391700	796600	476600	274800	265300	295300	214600	255100	332700	291400	539300	507900	273100	53188-23-1	HMDB0000660	C02336	ko00520//Amino sugar and nucleotide sugar metabolism	Carbohydrate metabolism	Metabolism
Com_436_neg	Galactinol	Carbohydrates And Its Derivatives	NEG	342.116	C12H22O11	0.99	16290000	17290000	16950000	36530000	36660000	33480000	21880000	27380000	20270000	12400000	14330000	15920000	24400000	27870000	18250000	7164000	7355000	7470000	31550000	30860000	28070000	23370000	34280000	24120000	16440000	21530000	23410000	21290000	28640000	26310000	22430000	23360000	22020000	23050000	3687-64-7	HMDB0005826	C01235	ko01100//Metabolic pathways;ko00052//Galactose metabolism	Carbohydrate metabolism;Global and overview maps	Metabolism
Com_437_neg	Ribulose-5-phosphate	Carbohydrates And Its Derivatives	NEG	230.02	C5H11O8P	0.93	419700	313800	354800	311900	216500	140900	262100	316800	255500	564100	518700	807500	508900	879400	593900	388500	408200	433200	170100	170600	187900	210100	280600	199900	622100	412600	506900	620100	686100	566100	441800	340400	303800	523000	--	--	-	-	-	-
Com_438_neg	Sucrose	Carbohydrates And Its Derivatives	NEG	342.116	C12H22O11	0.98	8434000	7378000	5700000	10570000	10130000	13690000	8172000	7513000	7355000	5051000	3732000	5949000	8745000	8269000	5352000	2980000	2502000	2025000	9945000	9041000	9249000	9858000	13870000	8234000	4348000	7217000	5268000	6704000	8884000	9114000	6612000	7677000	8567000	7492000	57-50-1	HMDB0000258	C00089	ko01100//Metabolic pathways;ko01110//Biosynthesis of secondary metabolites;ko02010//ABC transporters;ko00052//Galactose metabolism;ko00500//Starch and sucrose metabolism	Carbohydrate metabolism;Global and overview maps;Membrane transport	Environmental Information Processing;Metabolism
Com_439_neg	O-Phospho-L-serine	Amino Acid And Derivatives	NEG	185.072	C3H8NO6P	1.03	7846	7159	5758	10920	6959	7405	5278	9499	7029	7041	11950	10140	13080	14070	14360	10260	9109	6564	8444	10170	12840	9028	13010	6299	14260	16370	17370	8518	7668	12770	8095	12800	5742	8726	17885-08-4	HMDB0001721	C01005	ko01100//Metabolic pathways;ko01110//Biosynthesis of secondary metabolites;ko01120//Microbial metabolism in diverse environments;ko01230//Biosynthesis of amino acids;ko01200//Carbon metabolism;ko00270//Cysteine and methionine metabolism;ko00970//Aminoacyl-tRNA biosynthesis;ko00260//Glycine, serine and threonine metabolism	Amino acid metabolism;Global and overview maps;Translation	Genetic Information Processing;Metabolism
Com_440_neg	D-Glucose 1-phosphate	Carbohydrates And Its Derivatives	NEG	260.136	C6H13O9P	0.86	850900	815500	672400	327500	324600	383500	460800	404500	479700	353100	308900	379600	397800	245300	207800	246100	341700	251100	322800	269300	303800	431300	596300	458700	179800	202800	204300	255800	336900	388000	369800	354100	365100	300600	59-56-3	HMDB0001586	C00103	ko01100//Metabolic pathways;ko01110//Biosynthesis of secondary metabolites;ko01120//Microbial metabolism in diverse environments;ko00052//Galactose metabolism;ko00520//Amino sugar and nucleotide sugar metabolism;ko00010//Glycolysis / Gluconeogenesis;ko00040//Pentose and glucuronate interconversions;ko00500//Starch and sucrose metabolism;ko00561//Glycerolipid metabolism	Carbohydrate metabolism;Global and overview maps;Lipid metabolism	Metabolism
Com_441_neg	Phosphoenolpyruvic acid	Organic Acid And Its Derivatives	NEG	168.042	C3H5O6P	1.04	332700	423000	195100	68800	70200	148000	92010	161700	76470	67280	88620	109700	46270	38730	34790	340600	303700	239700	88290	52260	85920	67780	142900	99760	52900	79360	97610	27990	33100	56790	115200	92940	126000	101500	138-08-9	HMDB0000263	C00074	ko01100//Metabolic pathways;ko01110//Biosynthesis of secondary metabolites;ko01120//Microbial metabolism in diverse environments;ko01230//Biosynthesis of amino acids;ko01200//Carbon metabolism;ko00710//Carbon fixation in photosynthetic organisms;ko00010//Glycolysis / Gluconeogenesis;ko00400//Phenylalanine, tyrosine and tryptophan biosynthesis;ko00020//Citrate cycle (TCA cycle);ko00620//Pyruvate m…	Amino acid metabolism;Carbohydrate metabolism;Energy metabolism;Global and overview maps	Metabolism
Com_442_neg	(+)-Dipentene	Terpenoids	NEG	136.234	C10H16	18.28	154100	117500	159200	165200	157000	156100	110500	158600	154300	99710	158300	167500	163300	160500	161400	164200	125800	148000	152300	102200	149000	160200	165100	164200	165300	157800	174400	175300	179300	116100	186300	176200	150500	151800	--	--	-	-	-	-
Com_443_neg	D-Erythronolactone	Lactones	NEG	118.027	C4H6O4	4.05	32180	31600	25720	33200	31730	38940	34020	44620	40500	64490	56880	61420	114700	92840	123600	25840	21990	28410	36660	28000	29060	42230	53590	45110	79600	90910	99390	71690	73440	74980	123200	134300	123000	119800	17675-99-9	HMDB0000349	-	-	-	-
Com_444_neg	Benzyl acetate	Benzene and substituted derivatives	NEG	150.068	C9H10O2	13.51	2159	1555	2981	1752	1738	4274	4420	1438	4088	3716	3469	1928	13131	1569	5163	2104	1721	2179	5068	4868	3955	1227	2073	4571	4440	4279	1753	1776	1782	1857	3735	2860	4660	3512	140-11-4	HMDB0031310	-	-	-	-
Com_445_neg	L(-)-Malic acid	Tca Cycle	NEG	134.022	C4H6O5	1.08	11430000	15240000	12800000	26180000	27470000	30060000	26610000	26910000	22270000	18980000	17440000	21900000	34510000	27050000	35730000	13870000	15900000	13270000	34330000	33540000	37290000	37740000	55940000	58920000	22040000	24450000	26230000	20680000	25800000	26110000	25780000	27250000	26810000	26380000	--	--	-	-	-	-
Com_446_neg	S-Methylglutathione	Amino Acid And Derivatives	NEG	321.1	C11H19N3O6S	1.12	7101	22610	10490	16990	24940	29380	41040	17000	39010	7628	17350	26570	30310	16100	33670	14170	25800	17260	22190	36370	27480	40650	40900	44370	23420	28980	31110	26030	13200	34950	19800	33020	23340	21790	--	--	-	-	-	-
Com_447_neg	4-Hydroxy-3-methoxycinnamic acid	Cinnamic acids and derivatives	NEG	194.058	C10H10O4	5.34	560400	786200	506700	401200	447900	524400	438000	488600	545200	492100	441300	722300	1233000	720300	975700	756100	974000	690200	570200	733600	590100	694700	1241000	831500	788500	947900	1084000	491800	466000	650100	633200	622600	637100	635100	537-98-4	HMDB0000954	C01494	ko01100//Metabolic pathways;ko01110//Biosynthesis of secondary metabolites;ko00940//Phenylpropanoid biosynthesis	Biosynthesis of other secondary metabolites;Global and overview maps	Metabolism
Com_448_neg	Tricin 5-O-rutinoside	Flavonoids	NEG	638.1	C29H34O16	6.88	853500	1041000	726800	621000	824500	1080000	721600	831200	753100	729500	836000	1413000	1631000	1985000	1745000	6163000	7103000	5039000	4504000	5438000	4581000	4996000	7419000	5751000	6956000	6683000	8548000	3844000	4447000	4898000	3797000	3032000	3224000	2760000	--	--	-	-	-	-
Com_449_neg	3-N-Methyl-L-histidine	Amino Acid And Derivatives	NEG	169.181	C7H11N3O2	0.85	53360	51470	47000	35520	53840	43840	60140	65270	47500	69910	59930	59190	66270	72970	54010	48710	59040	46120	39590	45060	50680	48150	64620	53940	55780	62260	80710	107300	123500	120700	49140	49950	62370	47080	368-16-1	HMDB0000479	C01152	ko01100//Metabolic pathways;ko00340//Histidine metabolism	Amino acid metabolism;Global and overview maps	Metabolism
Com_450_neg	3-Hydroxypropanoic acid	Organic Acid And Its Derivatives	NEG	90.032	C3H6O3	1.21	13920	20240	19958	22724	20560	38210	24230	29970	23460	23220	22030	34003	31760	43450	29260	25030	19120	10480	24600	38920	39140	32640	48030	48800	29730	27791	28680	15320	29270	16600	34610	29590	19040	24690	503-66-2	HMDB0000700	C01013	ko01100//Metabolic pathways;ko01120//Microbial metabolism in diverse environments;ko01200//Carbon metabolism;ko00240//Pyrimidine metabolism;ko00410//beta-Alanine metabolism;ko00640//Propanoate metabolism	Carbohydrate metabolism;Global and overview maps;Metabolism of other amino acids;Nucleotide metabolism	Metabolism
Com_451_neg	1,5-Anhydro-D-glucitol	Alcohols and polyols	NEG	164.069	C6H12O5	1	17359	19251	15408	22370	8907	15230	18350	27280	31580	13960	9838	13970	38980	15830	23950	16110	14366	16014	12500	15220	13860	11830	19870	23780	35160	28880	14370	19590	22910	25810	13690	26100	12360	10520	-	HMDB0244228	-	-	-	-
Com_452_neg	5-oxoproline	Amino Acid And Derivatives	NEG	129.043	C5H7NO3	1.63	235900	186300	153000	24950	18900	22200	25990	27610	27990	39760	29650	42460	214200	226200	216100	405400	413700	358300	31490	29780	30390	43210	92260	54120	98670	139500	145900	165300	193000	183400	107600	122700	120200	116400	98-79-3	HMDB0000267	C01879	ko01100//Metabolic pathways;ko00480//Glutathione metabolism	Global and overview maps;Metabolism of other amino acids	Metabolism
Com_453_neg	Maltose	Carbohydrates And Its Derivatives	NEG	342.3	C12H22O11	1.01	410700	398400	333500	714000	711800	606200	452500	544100	458000	296800	279800	339300	523800	420600	325100	195600	178100	229400	625500	566400	512500	467900	762600	597100	318900	376100	460200	471200	508800	465900	505500	475900	440800	416200	-	HMDB0246552	C00208	ko01100//Metabolic pathways;ko01110//Biosynthesis of secondary metabolites;ko02010//ABC transporters;ko00500//Starch and sucrose metabolism	Carbohydrate metabolism;Global and overview maps;Membrane transport	Environmental Information Processing;Metabolism
Com_454_neg	p-Coumaric acid-4-O-glucoside	Phenolic acids	NEG	326.1	C15H18O8	5.55	1546000	2000000	2011000	1567000	1481000	1746000	1309000	1369000	1502000	1651000	1242000	2179000	2021000	1365000	1482000	1016000	1031000	922200	892100	1017000	938500	985400	1599000	1060000	1451000	1523000	1632000	847600	941300	952900	1379000	1326000	1310000	1251000	--	--	-	-	-	-
Com_455_neg	Lumichrome	Alkaloids and derivatives	NEG	242.233	C12H10N4O2	5.93	17370	26900	16350	20320	13690	26330	16160	10410	18120	16680	12110	16390	19760	8924	15710	21740	23760	19080	13320	14560	31560	22930	42240	24610	15170	34140	23980	9047	13870	13510	17950	18640	16150	10650	-	HMDB0254199	C01727	ko00740//Riboflavin metabolism	Metabolism of cofactors and vitamins	Metabolism
Com_456_neg	Pinoresinol-glucoside	Lignans	NEG	520.526	C26H32O11	7.23	10580	9390	11660	9013	4602	3857	4260	5796	5285	6561	9894	17460	38940	15550	8329	7879	12230	23450	11850	8861	8050	15890	27370	18480	15480	18640	30590	7810	10420	17730	13720	13420	8902	7531	--	--	-	-	-	-
Com_457_neg	Guanidineacetic acid	Amino Acid And Derivatives	NEG	117.054	C3H7N3O2	1.13	23620	43260	13530	25840	27020	25140	25570	37800	32440	35360	28020	33900	52320	45150	55930	29580	32870	33700	33780	28230	35530	45090	70440	44880	47790	48110	48330	58120	52960	70410	41190	45090	34560	39190	352-97-6	HMDB0000128	C00581	ko01100//Metabolic pathways;ko00330//Arginine and proline metabolism;ko00260//Glycine, serine and threonine metabolism	Amino acid metabolism;Global and overview maps	Metabolism
Com_458_neg	4'-Hydroxypropiophenone	Ketones	NEG	150.175	C9H10O2	7.9	9515	6435	4625	9166	15920	8583	8749	8695	12760	12800	6894	12550	8153	9156	11440	9282	7536	8958	6702	7374	8266	5193	9688	6176	14280	7925	12580	14160	7590	9661	12320	8495	11050	5979	--	--	-	-	-	-
Com_459_neg	Propylparaben	Benzene and substituted derivatives	NEG	180.2	C10H12O3	9.67	7333	9685	6798	9209	5412	9779	6679	6854	4071	8843	6306	5445	3092	6965	6441	10650	6856	9440	4363	8177	9991	5226	6388	6517	7069	7737	8996	6526	5876	6376	10360	5274	7194	5663	94-13-3	HMDB0032574	-	-	-	-
Com_460_neg	Chelidonic acid	Alkaloids and derivatives	NEG	184.1	C7H4O6	1.46	30660	45090	34210	72380	54060	64730	53590	73450	63200	71160	53920	69230	169000	255700	155800	39540	44340	31340	202300	149600	212400	226600	240700	275800	98100	134700	148700	366500	376800	332300	108000	114500	131300	126000	-	HMDB0249899	-	-	-	-
Com_461_neg	Bisdemethoxycurcumin	Phenylpropanoids and polyketides	NEG	308.328	C19H16O4	6.53	26250	44610	17780	28910	33740	32930	24930	28720	28680	38050	45350	49330	77000	54600	52300	50500	48910	47230	46600	48470	45010	75560	112500	61200	73900	74920	108500	40780	43850	53740	40900	44520	48210	49290	24939-16-0	HMDB0002114	C17743	ko01110//Biosynthesis of secondary metabolites;ko00945//Stilbenoid, diarylheptanoid and gingerol biosynthesis	Biosynthesis of other secondary metabolites;Global and overview maps	Metabolism
Com_462_neg	Isomucronulatol-7-O-glucoside	Flavonoids	NEG	464.469	C23H28O10	6.53	766900	901700	659300	430600	465600	554000	282500	420900	333600	413300	350800	646800	328400	203200	230000	26490	17970	11350	50580	62580	54890	28520	28470	45420	28080	29150	15020	70550	74340	78270	160200	193900	230900	214000	--	--	-	-	-	-
Com_463_neg	N-Acetyl-L-Tryptophan	Amino Acid And Derivatives	NEG	246.1	C13H14N2O3	6.72	926865	9386	3253	5486	7913	9539	82340	85450	99470	2651000	1266000	3528000	11430000	9730000	9890000	2679	3823	7669	6179	19990	12640	346700	643100	356900	3623000	7522000	9470000	5950000	5898000	7546000	1992000	2421000	2722000	2472000	1218-34-4	HMDB0013713	-	-	-	-
Com_464_neg	3-O-p-Coumaroylquinic acid	Phenolic acids	NEG	338.1	C16H18O8	5.92	7556000	10250000	8407000	2749000	3070000	4190000	3673000	4251000	4010000	3368000	3145000	4743000	3175000	2220000	2272000	3210000	3411000	2422000	1357000	1755000	1211000	2054000	3299000	2155000	1462000	1766000	1909000	607100	628700	642400	3105000	3206000	2948000	3042000	-	HMDB0029681	-	-	-	-
Com_465_neg	Rosmarinic acid-3'-O-glucoside	Phenolic acids	NEG	522.137	C24H26O13	6.54	55650	58890	47910	15830	31170	31380	31740	27820	31480	41720	30810	53370	44510	30150	28550	31750	60240	56430	36110	26250	38940	60120	83160	58350	46700	55500	80070	41920	54770	72250	36650	35450	30640	36190	--	--	-	-	-	-
Com_466_neg	2,6-Dimethyl-7-octene-2,3,6-triol	Alcohols and polyols	NEG	188.141	C10H20O3	7.31	308900	337100	299700	348900	361300	344000	277500	312400	329500	358600	367900	397700	408700	389000	416900	292400	345500	303800	340200	318400	339000	356100	415100	386100	393200	361900	354600	406200	440600	409100	372300	342900	377300	360000	73815-21-1	HMDB0038186	-	-	-	-
Com_467_neg	1-Hydroxypinoresinol-1-O-Glucoside	Lignans	NEG	536.189	C26H32O12	6.62	6991	13510	6391	10095	7772	9995	3840	3971	10110	3507	11700	9996	17860	5634	6340	10160	7046	9097	19460	10530	10260	16590	31200	15180	17570	20630	19700	13470	12420	16370	12490	7069	12730	5947	--	--	-	-	-	-
Com_468_neg	L-Citramalic acid	Organic Acid And Its Derivatives	NEG	148.037	C5H8O5	1.46	47560	46850	44110	91650	96450	138900	198300	179800	139600	206600	166800	226000	472700	316000	409400	71260	70220	50790	132900	153600	141500	199700	363500	286900	205900	324300	334500	301600	415800	553900	249800	262300	177700	217500	--	--	C02614	ko01100//Metabolic pathways;ko00660//C5-Branched dibasic acid metabolism	Carbohydrate metabolism;Global and overview maps	Metabolism
Com_469_neg	12(13)-EpOME	Fatty Acyls	NEG	296.235	C18H32O3	12.61	342600	402200	252900	143000	155700	149400	151700	183700	182100	92640	94350	163800	207700	138400	308500	150800	159200	110200	113900	129400	154100	166900	318500	234300	99850	87350	91260	103300	119000	140400	152400	153900	148900	155200	-	HMDB0004702	C14826	ko01100//Metabolic pathways;ko00591//Linoleic acid metabolism	Global and overview maps;Lipid metabolism	Metabolism
Com_470_neg	Sebacic acid	Organic Acid And Its Derivatives	NEG	202.248	C10H18O4	8.111	131600	162500	131700	153200	152500	149600	152200	147800	142000	136900	161100	190300	173400	164300	176600	143900	158800	152900	155700	164300	192000	165300	185600	154600	186400	164300	148700	173200	190900	184700	156700	137100	148900	132100	111-20-6	HMDB0000792	-	-	-	-
Com_471_neg	Isoquercitrin	Flavones and Flavonols	NEG	464.38	C21H20O12	6.596	1812000	1841000	1595000	956900	861200	1112000	611500	894600	699300	1108000	870200	1339000	790600	390000	455300	5452	5909	175660	56560	77010	70330	33590	60340	83160	14160	6458	8778	107800	105100	155800	487000	523100	452700	488000	482-35-9	HMDB0037362	C05623	ko01100//Metabolic pathways;ko01110//Biosynthesis of secondary metabolites;ko00944//Flavone and flavonol biosynthesis	Biosynthesis of other secondary metabolites;Global and overview maps	Metabolism
Com_472_neg	Eupatilin	Flavones and Flavonols	NEG	344.32	C18H16O7	10.004	198785	232278	177809	102703	110046	109528	107518	122681	106681	132290	128682	170482	20220	15300	63550	460400	543700	349900	230800	256700	276300	324500	479500	417800	154300	229000	202400	91520	112800	100200	130300	146300	126400	122600	22368-21-4	HMDB0029469	-	-	-	-
Com_473_neg	Quinic acid	Alcohols and polyols	NEG	192.17	C7H12O6	0.998	13760000	15240000	13730000	7941000	8762000	11900000	13320000	13530000	11210000	9639000	8632000	9937000	7178000	5260000	7772000	10360000	9480000	9199000	8654000	7794000	7027000	7537000	15680000	10630000	5132000	5061000	5741000	4387000	4957000	5088000	7780000	9322000	7722000	7761000	91-63-4	HMDB0042004	C00296	ko01100//Metabolic pathways;ko00400//Phenylalanine, tyrosine and tryptophan biosynthesis	Amino acid metabolism;Global and overview maps	Metabolism
Com_474_pos	L-Alanyl-L-leucine	Amino Acid And Derivatives	POS	202.251	C9H18N2O3	4.45	269000	364500	281900	499800	434800	630800	760300	665700	677400	550100	603900	1295000	1221000	653400	712700	670700	725600	603200	726600	824700	713700	836100	2524000	1011000	949000	1090000	1631000	701800	806100	1155000	779600	730500	653800	636200	-	HMDB0251509	-	-	-	-
Com_475_pos	L-Saccharopine	Amino Acid And Derivatives	POS	276.286	C11H20N2O6	1.03	614000	829400	450400	363600	413700	555000	684300	647100	563000	335300	428900	900500	716700	336300	673700	865400	861400	952000	771800	581400	801000	543300	1705000	994900	442800	688200	1161000	503000	481700	740000	518500	487400	535700	513300	997-68-2	HMDB0000279	C00449	ko01100//Metabolic pathways;ko01110//Biosynthesis of secondary metabolites;ko01230//Biosynthesis of amino acids;ko00310//Lysine degradation;ko00300//Lysine biosynthesis	Amino acid metabolism;Global and overview maps	Metabolism
Com_476_pos	L-Methionine sulfone	Amino Acid And Derivatives	POS	181.21	C5H11NO4S	1.84	2398000	3989000	2670000	12760000	11830000	17260000	24110000	25640000	21680000	27240000	20800000	47920000	60330000	31160000	36370000	3885000	4373000	3567000	12300000	14820000	12360000	31780000	87330000	37970000	56580000	59190000	88290000	38760000	46840000	61160000	28150000	26290000	24410000	24080000	7314-32-1	HMDB0062174	-	-	-	-
Com_477_pos	L-Methionine Methyl Ester	Amino Acid And Derivatives	POS	199.699	C6H14ClNO2S	0.95	79310	59590	161100	141600	71030	122800	84990	77200	29720	100500	50210	97730	82810	97800	99060	89030	130000	118700	58350	71960	74580	151300	46090	103700	52860	105000	196100	65670	69930	149700	139100	102000	54170	44840	--	--	-	-	-	-
Com_478_pos	L-Cysteine-glutathione gisulfide	Amino Acid And Derivatives	POS	426.466	C13H22N4O8S2	0.96	172700	198400	142800	271200	210100	302800	418700	376300	446000	374300	311400	764800	711800	234900	297500	58420	56600	52340	121700	157100	108700	272200	920200	344300	295400	368200	696000	204200	243500	392700	300700	233500	252000	291500	--	--	-	-	-	-
Com_479_pos	L-Cystathionine	Amino Acid And Derivatives	POS	222.262	C7H14N2O4S	0.84	134900	143500	99510	34300	31020	31340	27450	24170	22570	18040	8979	47560	47890	31130	27460	673900	624300	695400	62140	62060	50530	39690	70600	41530	76110	85660	126300	32630	32120	47140	71480	99160	94520	89390	56-88-2	HMDB0000099	C02291	ko01100//Metabolic pathways;ko01110//Biosynthesis of secondary metabolites;ko01230//Biosynthesis of amino acids;ko00270//Cysteine and methionine metabolism;ko00260//Glycine, serine and threonine metabolism	Amino acid metabolism;Global and overview maps	Metabolism
Com_480_pos	L-Canavanine	Amino Acid And Derivatives	POS	176.174	C5H12N4O3	2.96	42880	42540	27800	95690	77150	96350	50270	94000	35390	6731	7766	34570	160200	97630	69810	209700	130400	116100	273200	561500	518300	440700	1308000	592600	219200	175400	337900	419800	559500	1143000	237900	209700	208300	176400	543-38-4	HMDB0002706	-	-	-	-
Com_481_pos	Tomatidine	Alkaloids and derivatives	POS	415.652	C27H45NO2	6.76	48790	51350	18940	24170	21250	30490	29320	23290	42990	36540	33990	82130	60510	32150	25550	69610	74820	51790	27150	24840	45510	43020	64400	38590	30550	61870	90130	19410	21930	52070	48290	34250	31490	36400	77-59-8	HMDB0034731	-	-	-	-
Com_482_pos	Swainsonine	Alkaloids and derivatives	POS	173.21	C8H15NO3	5.53	15766	8603	18666	29056	29629	43200	30770	29788	32081	34800	30071	67040	116600	102900	75860	16871	16731	25560	22666	27186	24376	39360	78810	15170	118700	83600	96590	102400	69950	132900	28650	25320	13030	22300	--	--	C10173	ko00960//Tropane, piperidine and pyridine alkaloid biosynthesis	Biosynthesis of other secondary metabolites	Metabolism
Com_483_pos	Threonyl carbamoyl adenosine	Nucleotide And Its Derivates	POS	412.35	C15H20N6O8	5.08	7061	12920	8791	10600	15300	18310	21150	16470	25620	31360	21860	62160	62700	25030	41180	10090	12660	11670	14610	22450	15000	27590	96140	34690	29780	48790	69100	25240	38700	56880	31160	17590	17030	15370	--	--	-	-	-	-
Com_484_pos	Tetrahydroberberine	Alkaloids and derivatives	POS	339.39	C20H21NO4	7.39	11360	9950	6198	37940	50570	94760	54880	42760	49720	23310	15130	61770	27170	22910	16240	12640	13680	13510	32970	52480	40980	65400	199600	87630	33770	40180	78710	21960	26220	33590	36470	30180	52660	35470	-	HMDB0243674	-	-	-	-
Com_485_pos	TBHQ	Benzene and substituted derivatives	POS	166.22	C10H14O2	11.73	312400	369400	305300	333800	312700	324500	304100	297500	319800	341000	329100	318400	314600	330500	351800	319300	338700	271400	333500	322100	302400	344600	327200	343700	358300	308500	312800	362900	333600	296500	356000	372100	333700	334700	1948-33-0	HMDB0032062	-	-	-	-
Com_486_pos	N', N''-DiFeruloylagmatine-N-arabinoside	Amines	POS	614.64	C30H38N4O10	8	8025	1385	126514	15140	13960	13080	16940	8978	8189	3578	15220	24360	66680	34430	22730	7859	9037	11374	14030	16330	16160	10840	58930	35420	30990	25130	42380	45650	70610	70770	17640	15370	19050	10790	--	--	-	-	-	-
Com_487_pos	N', N''-Dicaffeoylspermidine	Amines	POS	469.53	C25H31N3O6	5.57	33980	35780	14630	28410	40800	18990	34120	36810	43040	19420	26220	30910	70720	17260	27320	15900	18230	13060	12790	15660	5464	22710	14820	15230	26500	19480	14680	11260	13600	22840	37810	13080	12290	24760	--	--	-	-	-	-
Com_488_pos	N', N''-Caffeoyl, feruloylputrescine	Amines	POS	426.46	C23H26N2O6	0.98	191500	182100	154900	284000	259200	382900	622300	513800	450400	390000	451000	835100	840700	288800	367900	61330	90980	79510	153100	192800	206500	301900	1050000	466700	397500	658500	894500	366900	362100	526700	282200	296000	277300	235900	--	--	-	-	-	-
Com_489_pos	Putrescine	Amines	POS	88.1	C4H12N2	0.68	847000	905600	709700	660600	550900	715100	680400	743300	759400	750800	438400	744800	897700	444500	609000	354100	525600	323500	417800	607000	555800	540500	1112000	550200	394400	521800	714700	594000	472700	626600	566700	504000	544700	549500	110-60-1	HMDB0001414	C00134	ko01100//Metabolic pathways;ko01110//Biosynthesis of secondary metabolites;ko02010//ABC transporters;ko00330//Arginine and proline metabolism;ko00480//Glutathione metabolism;ko00960//Tropane, piperidine and pyridine alkaloid biosynthesis	Amino acid metabolism;Biosynthesis of other secondary metabolites;Global and overview maps;Membrane transport;Metabolism of other amino acids	Environmental Information Processing;Metabolism
Com_490_pos	Malvidin 3-O-galactoside	Anthocyanins	POS	493	C23H25O12	7.63	44532	57755	43071	101398	102238	251307	32380	67030	54210	64260	38860	149986	168400	33420	70720	46160	31036	32682	150500	80710	198100	173800	482900	214300	59647	57560	75710	290700	614000	729400	82330	141300	74450	91690	--	--	-	-	-	-
Com_491_pos	1,5-Diaminopentane	Amines	POS	102.116	C5H14N2	0.83	73230	66620	44110	44840	59260	38370	57570	45500	25900	119500	59580	167500	1074000	811400	1017000	154800	163300	127000	38000	25510	66380	64120	88270	82330	342000	464800	906500	966900	958900	1267000	280600	325800	293600	273200	462-94-2	HMDB0002322	C01672	ko01100//Metabolic pathways;ko01110//Biosynthesis of secondary metabolites;ko01120//Microbial metabolism in diverse environments;ko00310//Lysine degradation;ko00480//Glutathione metabolism;ko00960//Tropane, piperidine and pyridine alkaloid biosynthesis	Amino acid metabolism;Biosynthesis of other secondary metabolites;Global and overview maps;Metabolism of other amino acids	Metabolism
Com_492_pos	Phthalic anhydride	Organoheterocyclic compounds	POS	148	C8H4O3	11.61	547600	517200	630500	568800	619100	552900	481700	520800	434000	575200	521600	601400	633400	674700	572900	589300	538700	621200	490000	502700	583500	570100	617900	449800	646200	577900	472500	577600	560800	589200	596500	593000	581300	666300	-	HMDB0256501	-	-	-	-
Com_493_pos	Maleic acid	Organic Acid And Its Derivatives	POS	116.011	C4H4O4	0.96	528900	638500	470400	1560000	1428000	1607000	5634000	5989000	5913000	19230000	14330000	24710000	43980000	32270000	33310000	563700	597200	547200	1048000	1166000	1009000	8073000	16150000	8692000	34510000	36430000	47250000	32540000	37540000	43030000	18670000	18500000	16490000	16650000	-	HMDB0303644	C01384	ko01100//Metabolic pathways;ko01120//Microbial metabolism in diverse environments;ko00760//Nicotinate and nicotinamide metabolism;ko00350//Tyrosine metabolism;ko00650//Butanoate metabolism	Amino acid metabolism;Carbohydrate metabolism;Global and overview maps;Metabolism of cofactors and vitamins	Metabolism
Com_494_pos	C-hexosyl-tricetin O-pentoside	Flavonoids	POS	612.49	C26H28O17	7.02	14030	25040	29480	22290	12570	23700	18840	17500	6082	9212	8718	45900	54140	56540	35830	125600	135800	151200	188400	301500	179800	175500	426600	168000	309900	284300	455800	248200	210400	382400	118900	115500	107000	89010	--	--	-	-	-	-
Com_495_pos	Dibutyl phthalate	Benzoic acids and derivatives	POS	278.152	C16H22O4	13.42	4020000	3667000	3338000	3609000	3821000	3897000	4393000	3859000	3348000	3973000	4674000	4343000	3294000	3508000	4000000	4734000	4383000	3359000	4064000	4496000	3799000	3757000	3210000	3770000	3904000	4258000	3346000	3338000	4192000	3768000	3625000	3750000	4272000	4122000	84-74-2	HMDB0033244	-	-	-	-
Com_496_pos	Chrysoeriol 7-O-rutinoside	Flavonoids	POS	608.545	C28H32O15	6.94	485200	637400	519100	741000	456700	777200	350600	437900	333700	474200	340100	1223000	1609000	1147000	1091000	4468000	4422000	3981000	5527000	9241000	5452000	4256000	13630000	5642000	7534000	7629000	13000000	7379000	7321000	8786000	3067000	3329000	3521000	2847000	--	--	-	-	-	-
Com_497_pos	Chrysoeriol 5-O-hexoside	Flavonoids	POS	462.404	C22H22O11	7.18	970000	1500000	1042000	741500	656800	890300	450500	698600	564100	677700	597200	1344000	653700	272100	240800	317000	308200	250300	233900	797000	434700	260900	718700	331700	344900	298200	638600	358700	419500	614200	461000	507600	521500	441200	--	--	-	-	-	-
Com_498_pos	Chrysoeriol C-hexoside	Flavonoids	POS	462.404	C22H22O11	6.72	1773000	3088000	2099000	2428000	1611000	2400000	1381000	1797000	1245000	1985000	1745000	4624000	2996000	1234000	1110000	1627000	1726000	1499000	836300	1343000	1147000	1065000	2260000	907700	1049000	1627000	2441000	1014000	1174000	1702000	1499000	1315000	1375000	1448000	--	--	-	-	-	-
Com_499_pos	Serotonin	Indoles and derivatives	POS	176.215	C10H12N2O	2.96	49660	53400	31870	110100	93770	122400	55000	110300	41690	7996	10210	44510	199900	125100	82790	246500	166600	160100	353100	753800	668800	535900	1579000	739000	263600	226900	405300	505500	730700	1462000	301400	253100	257400	244900	50-67-9	HMDB0000259	C00780	ko01100//Metabolic pathways;ko01110//Biosynthesis of secondary metabolites;ko00380//Tryptophan metabolism	Amino acid metabolism;Global and overview maps	Metabolism
Com_500_pos	Sarcosine	Amino Acid And Derivatives	POS	89.093	C3H7NO2	0.9	18280000	19070000	15620000	7698000	7302000	8914000	9048000	9901000	8178000	9423000	8601000	12810000	14010000	9894000	12270000	14370000	14420000	12950000	8110000	9342000	8694000	10820000	15780000	11980000	14020000	14670000	16500000	13380000	15410000	16020000	13380000	12540000	11320000	10980000	107-97-1	HMDB0000271	C00213	ko01100//Metabolic pathways;ko00330//Arginine and proline metabolism;ko00260//Glycine, serine and threonine metabolism	Amino acid metabolism;Global and overview maps	Metabolism
Com_501_pos	Spermidine	Amines	POS	145.246	C7H19N3	0.68	1801000	2794000	1631000	1701000	1445000	2296000	1503000	1490000	1238000	1073000	708700	1483000	2649000	825000	535700	2031000	2686000	2098000	1004000	1093000	1357000	1228000	3576000	2250000	620000	993500	1565000	460400	610400	997400	1171000	1383000	1395000	1298000	124-20-9	HMDB0001257	C00315	ko01100//Metabolic pathways;ko02010//ABC transporters;ko00330//Arginine and proline metabolism;ko00480//Glutathione metabolism;ko00940//Phenylpropanoid biosynthesis;ko00410//beta-Alanine metabolism	Amino acid metabolism;Biosynthesis of other secondary metabolites;Global and overview maps;Membrane transport;Metabolism of other amino acids	Environmental Information Processing;Metabolism
Com_502_pos	S-Methyl-5'-thioadenosine	Nucleotide And Its Derivates	POS	297.333	C11H15N5O3S	4.94	245800	298100	238300	505900	470400	721200	738200	833400	644400	375200	276400	670600	657800	316900	259300	268800	266800	247100	535300	591500	499100	740400	1952000	850400	319800	412500	559600	281500	605800	440300	406000	429300	339200	349700	2457-80-9	HMDB0001173	C00170	ko01100//Metabolic pathways;ko00270//Cysteine and methionine metabolism;ko00908//Zeatin biosynthesis	Amino acid metabolism;Global and overview maps;Metabolism of terpenoids and polyketides	Metabolism
Com_503_pos	R-Aminobutyrate	Organic Acid And Its Derivatives	POS	103.12	C4H9NO2	0.91	9432000	10880000	8122000	13860000	12240000	15510000	16380000	18840000	16190000	12510000	10660000	17100000	16350000	11980000	12200000	13320000	14130000	13030000	16640000	17210000	15500000	21610000	31070000	22210000	19540000	20110000	23740000	12310000	12030000	13510000	16000000	16040000	14910000	12980000	--	--	-	-	-	-
Com_504_pos	Purine	Purines and purine derivatives	POS	120.112	C5H4N4	4.1	23180	32640	19720	125300	119800	192100	292000	284700	286500	410200	320700	622700	1117000	703500	811500	17180	26900	21790	122000	144700	111500	393900	902200	445900	813000	884000	1291000	735600	829200	1040000	453700	377100	375100	411200	120-73-0	HMDB0001366	-	-	-	-
Com_505_pos	S-Adenosyl-methionine	Nucleotide And Its Derivates	POS	570.639	C22H30N6O8S2	0.84	426700	470800	413100	822000	905300	1106000	1667000	1136000	1301000	675400	679400	1633000	1592000	366800	637600	527300	514600	440000	1078000	975300	1334000	1289000	5461000	1818000	544000	693600	1210000	579400	455700	954100	861600	754000	765800	921100	485-80-3	HMDB0001185	C00019	ko01100//Metabolic pathways;ko01110//Biosynthesis of secondary metabolites;ko01230//Biosynthesis of amino acids;ko00330//Arginine and proline metabolism;ko00270//Cysteine and methionine metabolism;ko00908//Zeatin biosynthesis;ko04122//Sulfur relay system;ko00261//Monobactam biosynthesis	Amino acid metabolism;Biosynthesis of other secondary metabolites;Folding, sorting and degradation;Global and overview maps;Metabolism of terpenoids and polyketides	Genetic Information Processing;Metabolism
Com_506_pos	Vitamin B2	Vitamins	POS	376.364	C17H20N4O6	5.94	384800	540500	358200	416500	362500	469600	290300	286000	297000	317100	162200	706200	476300	204000	373300	283200	334600	273100	322200	341000	310400	316900	1161000	375800	363100	455400	716100	179100	176100	351000	262100	300300	345500	308500	83-88-5	HMDB0000244	C00255	ko01100//Metabolic pathways;ko01110//Biosynthesis of secondary metabolites;ko02010//ABC transporters;ko00740//Riboflavin metabolism	Global and overview maps;Membrane transport;Metabolism of cofactors and vitamins	Environmental Information Processing;Metabolism
Com_507_pos	Pro-Leu	Amino Acid And Derivatives	POS	228.288	C11H20N2O3	1.72	343000	618800	784200	217200	584300	839355	653300	570400	581000	683666	503400	1092000	3797000	864620	1827000	665300	850600	560200	427700	696800	600400	1572000	2919000	1122000	137800	956000	1525000	1901000	1719000	3458000	545400	919300	1490000	856400	-	HMDB0253028	-	-	-	-
Com_508_pos	Nε,Nε,Nε-trimethyllysine	Amino Acid And Derivatives	POS	188.267	C9H20N2O2	0.76	1168000	1525000	1158000	1970000	1472000	2292000	1862000	1771000	1659000	2497000	2187000	3419000	3013000	2043000	2077000	895100	890600	890200	1453000	1450000	1215000	1397000	1840000	1386000	2004000	2244000	2478000	1621000	1511000	1855000	1686000	1751000	1720000	1746000	--	--	-	-	-	-
Com_509_pos	Linderane	Terpenoids	POS	260.285	C15H16O4	11.266	9620	14440	13630	15370	19400	20290	14870	8596	16230	22040	23650	40010	41240	22490	68500	11980	15870	12400	22110	37480	30500	21640	39140	23690	33160	30140	58720	17930	40710	41180	14940	28430	18800	22680	--	--	-	-	-	-
Com_510_pos	Schaftoside	Flavones and Flavonols	POS	564.492	C26H28O14	6.074	17020000	24920000	16620000	15880000	15310000	21940000	16120000	16770000	17660000	24360000	18580000	39780000	50820000	24390000	28720000	43380000	44860000	34830000	26440000	40170000	29460000	34120000	72430000	34790000	41860000	45190000	67580000	22930000	21450000	32520000	27520000	25550000	24720000	27700000	207461-10-7	HMDB0033571	-	-	-	-
Com_511_pos	Delphinidin 3-O-Rutinoside	Anthocyanins	POS	611.5	C27H31O16	6.35	25600	31620	27990	100200	110500	116100	60460	69230	28780	49850	48060	142700	87750	45770	55850	48127	46540	51688	267600	133000	197400	285200	631700	195200	17250	27980	22040	452400	332400	534800	114500	49740	91700	108700	15674-58-5	HMDB0038001	C16315	ko00942//Anthocyanin biosynthesis	Biosynthesis of other secondary metabolites	Metabolism
Com_512_pos	Pelargonidin 3-O-malonylhexoside	Anthocyanins	POS	519.1	C24H23O13	7.23	49320	51080	26330	34200	24910	39940	6957	34460	8474	40490	22470	75450	43170	18800	27310	57150	43010	46870	36810	50440	23700	46500	135200	36750	52450	50320	69160	32610	44190	50180	50540	19280	25250	34070	--	--	-	-	-	-
Com_513_pos	Cyanidin 3-O-malonylhexoside	Anthocyanins	POS	535.1	C24H23O14	6.73	146000	195600	129700	108400	96180	154700	66330	97110	52470	149500	96280	282600	331300	212100	219700	543900	598700	583300	2187000	3246000	2232000	1187000	2932000	1329000	4107000	3075000	5214000	1935000	3197000	4289000	1088000	1078000	1016000	1081000	--	--	-	-	-	-
Com_514_pos	LysoPC 20:0 (2n isomer)	Phospholipid	POS	551.39	C28H58NO7P	9.09	194100	280000	147400	125300	87530	137100	93900	92590	67740	56710	45130	113300	22830	13510	13950	84530	68370	98210	189500	295700	269400	157700	317400	174500	34770	42440	67810	33950	34280	52780	98470	119300	94740	88530	--	--	-	-	-	-
Com_515_pos	Bornyl acetate	Phenols And Its Derivatives	POS	196.29	C12H20O2	9.209	93040	113000	134300	78070	80950	77110	40430	38960	38060	43110	45060	55580	109800	48280	61730	29840	41540	41910	137700	153900	112300	77280	174900	79630	37240	38370	52700	14540	17950	36180	63420	66330	47970	44210	-	HMDB0303194	-	-	-	-
Com_516_pos	PolygalaxanthoneⅥ	Ketones	POS	494.452	C23H26O12	7.14	149800	179600	121000	84930	82040	113600	71900	104100	93620	83260	80190	208900	126900	36610	80940	40570	38800	27120	22690	28480	20250	24950	100500	21940	33540	26690	42210	28000	24890	21520	47810	42670	63730	72280	--	--	-	-	-	-
Com_517_pos	Decursinol	Coumarins and derivatives	POS	246.263	C14H14O4	6.82	6286	25050	15190	11740	11049	9015	9919	12250	12080	6806	5372	15090	10139	8635	13770	11240	9677	6648	7128	5308	9191	6949	10200	20820	7084	7456	10540	7587	6931	9360	5772	5490	7097	12140	130848-06-5	HMDB0040670	-	-	-	-
Com_518_pos	Nodakenetin	Coumarins and derivatives	POS	246.262	C14H14O4	6.82	25520	35690	21560	8000	13056	18335	10130	5667	8104	17330	19180	29810	16820	9399	12110	31350	17260	8719	13695	7079	12789	19970	22030	10220	7085	11007	11900	6270	10918	15361	17200	18390	11700	15200	-	HMDB0302268	-	-	-	-
Com_519_pos	3-[(Carboxycarbonyl)amino]-L-alanine	Organic Acid And Its Derivatives	POS	176.129	C5H8N2O5	0.84	31510	39080	24530	31610	17820	31580	31230	37090	28550	21420	14290	16480	25350	25470	19000	51410	44810	10020	24460	27550	43890	30210	68350	34990	34420	42960	28940	58830	46500	58550	51310	45930	31960	22680	--	--	-	-	-	-
Com_520_pos	Kaempferol-3-gentiobioside	Flavonoids	POS	610.525	C27H30O16	6.28	13508	8361	6269	13665	15524	14606	16748	15518	18426	23281	16408	33295	36043	11430	6547	24733	35682	27232	22460	30331	16690	7728	64220	24320	130300	138400	107300	36560	38010	64780	21940	20360	21950	19260	-	HMDB0303606	-	-	-	-
Com_521_pos	Adenosine 5'-Diphosphate	Nucleotide And Its Derivates	POS	427.201	C10H15N5O10P2	1.05	16470	13030	37810	30770	15330	46190	29950	29420	21360	20440	25190	37240	95350	45120	48500	10390	17350	14840	6898	26320	25040	25190	16810	21810	24560	66570	61680	41220	53640	91040	18350	21250	14050	18180	58-64-0	HMDB0001341	C00008	ko01100//Metabolic pathways;ko01110//Biosynthesis of secondary metabolites;ko00230//Purine metabolism;ko00908//Zeatin biosynthesis;ko00190//Oxidative phosphorylation;ko00195//Photosynthesis	Energy metabolism;Global and overview maps;Metabolism of terpenoids and polyketides;Nucleotide metabolism	Metabolism
Com_522_pos	Aspartic Acid	Amino Acid And Derivatives	POS	133.103	C4H7NO4	0.84	11990000	12830000	10900000	20870000	22550000	23890000	19020000	19800000	18220000	20170000	20140000	26140000	20120000	12410000	16140000	11230000	11310000	11310000	23610000	22550000	21480000	18330000	25730000	21860000	19460000	20520000	22390000	16490000	18010000	19460000	16010000	17130000	15820000	14720000	1783-96-6	HMDB0006483	-	-	-	-
Com_523_pos	Ala-gly	Amino Acid And Derivatives	POS	146.144	C5H10N2O3	0.84	58470000	57200000	46020000	12890000	10030000	10770000	14280000	14780000	12490000	12550000	10660000	19630000	27190000	19470000	22660000	83030000	80680000	78400000	11410000	13180000	12120000	15270000	26800000	17000000	18110000	22640000	35660000	22580000	24960000	29700000	30290000	32440000	28260000	29090000	687-69-4	HMDB0006899	-	-	-	-
Com_524_pos	Allopurinol	Nucleotide And Its Derivates	POS	136.111	C5H4N4O	2.69	148100	187300	508900	74520	83180	99490	102700	104700	101200	102500	64370	179900	294400	152500	158000	214800	211200	192600	98710	123700	117200	99480	307900	113300	125800	142600	222600	96620	126400	148900	145200	120900	152000	140400	315-30-0	HMDB0014581	-	-	-	-
Com_525_pos	Gly-Phe	Amino Acid And Derivatives	POS	222.24	C11H14N2O3	4.88	60770	100400	68310	143200	123700	157800	186600	204200	199800	181600	137400	292300	508200	230200	316200	218100	252400	204800	203200	205800	246900	308100	837600	422800	396300	407300	663700	328400	395100	588300	245200	264300	227100	233500	-	HMDB0028848	-	-	-	-
Com_526_pos	Gly-Tyr	Amino Acid And Derivatives	POS	238.24	C11H14N2O4	3.09	91550	125200	86700	131100	121100	167000	126200	135900	131500	149300	116600	305300	276800	144500	181000	249200	235900	219300	202400	263900	202800	187700	526800	211600	294300	351000	492600	147200	168000	225500	195300	185100	173300	164900	-	HMDB0304778	-	-	-	-
Com_527_pos	glutathione disulfide	Amino Acid And Derivatives	POS	612.631	C20H32N6O12S2	1.81	322600	610000	310000	574700	519000	868100	940300	834400	785700	677100	502600	2245000	1963000	516700	481000	262000	252200	223400	510200	520200	452600	558400	3071000	833100	939200	1114000	2462000	308000	523100	788400	542700	597800	552400	524500	27025-41-8	HMDB0003337	C00127	ko01100//Metabolic pathways;ko00480//Glutathione metabolism	Global and overview maps;Metabolism of other amino acids	Metabolism
Com_528_pos	Histidine	Amino Acid And Derivatives	POS	155.15	C6H9N3O2	0.81	2492000	3118000	3071000	14710000	13370000	13930000	13410000	14020000	13400000	24530000	20050000	31610000	41580000	29890000	29790000	1974000	2201000	1857000	6840000	8788000	7166000	10970000	16030000	10370000	33760000	38020000	40320000	24920000	26010000	27320000	19110000	15810000	15750000	17000000	71-00-1	HMDB0000177	-	-	-	-
Com_529_pos	Homocysteic acid	Amino Acid And Derivatives	POS	183.18	C4H9NO5S	1.83	14080	18560	19700	60430	79380	101100	143000	167000	130700	144500	118800	301400	386100	203800	234100	34560	28850	8203	70110	91260	80110	207800	534900	232900	332000	406700	582400	241600	307200	418700	236000	163900	150600	153500	-	HMDB0251520	-	-	-	-
Com_530_pos	Homoserine	Amino Acid And Derivatives	POS	119.119	C4H9NO3	0.9	11700000	11770000	9806000	11410000	11940000	11430000	13300000	15220000	11850000	9647000	9220000	13990000	13980000	10090000	11320000	11580000	9922000	11380000	10750000	10400000	9054000	13430000	19150000	13680000	11100000	10700000	13400000	9016000	8978000	11590000	11310000	11250000	11490000	9780000	672-15-1	HMDB0000719	C00263	ko01100//Metabolic pathways;ko01110//Biosynthesis of secondary metabolites;ko01120//Microbial metabolism in diverse environments;ko01230//Biosynthesis of amino acids;ko00270//Cysteine and methionine metabolism;ko00260//Glycine, serine and threonine metabolism;ko00300//Lysine biosynthesis;ko00920//Sulfur metabolism	Amino acid metabolism;Energy metabolism;Global and overview maps	Metabolism
Com_531_pos	d-(+)-chiro-inositol	Alcohols and polyols	POS	180.156	C6H12O6	18.32	270200	264600	266700	258100	264800	258000	248700	267900	250900	271400	264300	269800	270200	273800	272300	266400	247300	260600	261800	252700	255500	276100	239500	258700	259200	254800	248500	275600	249600	270200	263000	249300	260700	279000	643-12-9	HMDB0240209	C19891	ko01100//Metabolic pathways;ko01120//Microbial metabolism in diverse environments;ko00562//Inositol phosphate metabolism	Carbohydrate metabolism;Global and overview maps	Metabolism
Com_532_pos	Isomaltose	Carbohydrates And Its Derivatives	POS	342.297	C12H22O11	0.9	37270	79480	43300	194000	111400	97020	123900	211300	110500	78660	93800	76450	114500	125600	98130	28190	42820	46050	80570	92220	89360	123100	162500	158700	60850	44410	81300	104600	143900	132700	89530	78140	127100	88670	37169-69-0	HMDB0002923	C00252	ko01100//Metabolic pathways;ko00500//Starch and sucrose metabolism	Carbohydrate metabolism;Global and overview maps	Metabolism
Com_533_pos	Tricin 5-O-hexoside	Flavonoids	POS	492.43	C23H24O12	7.19	7283000	8895000	7353000	5530000	4017000	6390000	4029000	4939000	4091000	5709000	4772000	10490000	5417000	2109000	1624000	2129000	1929000	1231000	950100	1650000	1143000	1096000	2819000	1304000	1273000	1359000	2347000	618600	746100	867900	3101000	2827000	3072000	2634000	--	--	-	-	-	-
Com_534_pos	Tricin 4'-O-(beta-guaiacylglyceryl) ether	Flavonoids	POS	526.49	C27H26O11	7.32	117000	122000	44330	174500	124700	223300	72990	81300	79400	115900	69090	142700	113700	43270	71101	28570	23390	31796	21310	57070	43253	27010	110925	59660	31650	45740	98400	49634	45530	76515	73590	82310	51720	104800	--	--	-	-	-	-
Com_535_pos	Tricin 4'-O-(beta-guaiacylglyceryl) ether 5-O-hexoside	Flavonoids	POS	688.63	C33H36O16	7.51	517200	626200	416000	571300	391100	542600	307400	323900	372900	532200	269800	873100	807600	260000	217200	143000	108400	114500	88630	92820	97110	98300	338900	110900	91880	99680	216700	64570	120800	165000	260100	242200	239300	203100	--	--	-	-	-	-
Com_536_pos	Tricin 4'-O-(syringyl alcohol) ether 5-O-hexoside	Flavonoids	POS	658.6	C32H34O15	10.82	6801	14700	7567	17630	5883	19350	9138	8731	3782	19230	12420	54400	28590	3296	8127	15090	4837	3980	35210	13980	16630	11050	105100	24610	19150	12020	35870	3820	11270	15500	13820	6657	8771	13610	--	--	-	-	-	-
Com_537_pos	Tricin 4'-O-(syringyl alcohol) ether O-hexoside	Flavonoids	POS	658.6	C32H34O15	7.34	67080	106400	80420	76250	72380	119700	68230	52570	146300	79880	58420	169100	178500	60210	71860	24290	6230	6678	36762	6240	8575	10100	16300	26393	6703	4819	21340	7227	32516	50972	46630	34720	36450	34330	--	--	-	-	-	-
Com_538_pos	Tricetin O-hexoside	Flavonoids	POS	464.383	C21H20O12	6.46	44992	54410	33770	134500	111300	116300	50388	47341	52680	64008	57081	122510	165642	53850	91294	40036	54603	39270	143600	181400	76760	102200	181800	253200	95268	104393	60840	216000	224500	496300	79450	64360	43650	75470	--	--	-	-	-	-
Com_539_pos	Citronellyl acetate	Fatty Acyls	POS	198.3	C12H22O2	11.795	119500	145200	59790	117700	80580	125000	118500	53310	94000	120800	126500	126600	100600	105200	84350	93320	102500	111200	79210	126500	146600	65750	149200	106900	169800	40840	108000	111800	72950	128200	75950	124500	94840	119200	-	HMDB0034844	-	-	-	-
Com_540_pos	Benzoyleneurea	Organoheterocyclic compounds	POS	162.15	C8H6N2O2	11.68	3787000	3810000	3311000	3179000	3507000	3749000	3632000	3686000	3418000	3754000	3611000	3565000	3656000	3432000	3260000	3958000	3908000	3582000	3635000	3905000	3670000	3736000	3594000	3684000	3630000	4312000	3682000	3648000	3317000	3847000	3882000	4062000	3583000	3416000	-	HMDB0249051	-	-	-	-
Com_541_pos	Geranyl acetate	Fatty Acyls	POS	196.29	C12H20O2	1.2	1910000	1744000	2084000	1314000	789300	1116000	1345000	1415000	1314000	1519000	800900	1328000	956600	1376000	1178000	2264000	1511000	2208000	1154000	1266000	727300	1192000	495200	722300	1329000	889000	1173000	1636000	1104000	1397000	1185000	805200	1328000	1514000	105-87-3	HMDB0035157	-	-	-	-
Com_542_pos	6-Paradol	Benzene and substituted derivatives	POS	278.39	C17H26O3	12.85	47920	63730	46640	37220	34400	37750	25440	41450	29090	22370	22200	34900	52060	24660	46850	23360	28310	27330	31500	49220	46690	40780	102300	48330	20840	16900	25040	25150	24720	43580	26360	24670	17530	25390	27113-22-0	HMDB0030801	-	-	-	-
Com_543_pos	N-(3-Indolylacetyl)-L-Alanine	Indoles and derivatives	POS	246.262	C13H14N2O3	6.78	16270	14095	4507	11420	14084	14268	13867	4195	5191	10300	10770	18590	73820	27160	52720	10317	10923	11928	3265	11020	12796	11635	8685	3222	33270	23510	43990	35540	19080	42170	13230	15500	14150	7560	--	--	-	-	-	-
Com_544_pos	N-(9H-Purin-6-ylcarbamoyl)threonine	Nucleotide And Its Derivates	POS	280.24	C10H12N6O4	14.46	132100	76910	161600	217800	161600	286500	187600	224000	94660	192000	242700	312300	139300	69730	410200	121500	137000	162300	122200	260900	88200	117900	307600	104200	127400	173800	320800	92470	61080	125300	93160	84930	76990	75290	--	--	-	-	-	-
Com_545_pos	C-pentosyl-C-hexosyl-apigenin	Flavonoids	POS	564.49	C26H28O14	6.05	6351000	7612000	5560000	5529000	4786000	6284000	5835000	5970000	5378000	8038000	6824000	16790000	20490000	9091000	10650000	16750000	14620000	15140000	10120000	14300000	10470000	12400000	28040000	12900000	17010000	18450000	26660000	7410000	7251000	11210000	11000000	10670000	8851000	9355000	--	--	-	-	-	-
Com_546_pos	C-pentosyl-apigenin O-p-coumaroylhexoside	Flavonoids	POS	710.63	C35H34O16	7.17	14150	15778	15931	15254	12448	19493	14250	14046	18586	15550	13705	26616	10140	16667	4233	20940	17070	30860	15270	21510	8055	12840	70740	31450	33020	27060	76210	7445	12480	17300	8714	8921	6662	11850	--	--	-	-	-	-
Com_547_pos	C-pentosyl-apeignin O-feruloylhexoside	Flavonoids	POS	740.66	C36H36O17	7.26	1794	19236	1828	27370	15620	35400	21110	23420	23300	17210	16970	33070	122000	76150	66850	24263	26053	19470	39050	52750	30710	53920	102000	35640	65890	62160	141100	78290	79570	134800	60260	63270	34030	32000	--	--	-	-	-	-
Com_548_pos	Betanin	Alkaloids and derivatives	POS	550.143	C24H26N2O13	6.65	77940	58550	53720	104900	92350	163000	112100	95560	76770	197200	149900	266200	231100	217200	174100	2264	46947	2430	71800	67830	118700	77000	214100	127900	80624	95111	14730	152200	230800	282900	81100	122200	104400	92480	7659-95-2	HMDB0029408	C08540	ko01110//Biosynthesis of secondary metabolites;ko00965//Betalain biosynthesis	Biosynthesis of other secondary metabolites;Global and overview maps	Metabolism
Com_549_pos	D-Panthenol	Fatty Acyls	POS	205.131	C9H19NO4	4.7	5039	4615	4914	3914	2619	2677	10110	9547	8407	7764	9230	37060	20730	12180	14380	5952	10282	8969	7452	6023	4577	2743	4485	3357	24950	29250	27410	8757	16430	24570	15850	21120	16810	10330	-	HMDB0304820	C05944	ko00770//Pantothenate and CoA biosynthesis	Metabolism of cofactors and vitamins	Metabolism
Com_550_pos	N2-Acetyl-L-lysine	Amino Acid And Derivatives	POS	188.224	C8H16N2O3	1.03	34340000	46330000	32890000	46990000	38260000	50830000	40080000	33870000	33050000	50660000	34980000	73980000	87640000	43490000	61690000	23990000	27860000	22900000	27450000	36990000	41570000	36110000	97410000	49450000	37200000	41830000	56480000	53420000	58250000	74430000	46610000	42990000	37330000	41880000	1946-82-3	HMDB0000446	-	-	-	-
Com_551_pos	Nε-(1-Carboxymethyl)-L-lysine	Amino Acid And Derivatives	POS	204.224	C8H16N2O4	0.84	63960	74970	49710	108800	96860	95750	107000	77760	86630	72860	63210	102800	142200	69070	71780	53060	64140	76620	80720	79230	78020	101300	196900	111200	93230	100100	142300	78160	45620	106100	73500	82740	80930	112300	--	--	-	-	-	-
Com_552_pos	N-Methyl-a-aminoisobutyric acid	Amino Acid And Derivatives	POS	117.146	C5H11NO2	1.22	7153000	7987000	5311000	11820000	12730000	13860000	23060000	22430000	20180000	31170000	29310000	55070000	95030000	50950000	66270000	3998000	3879000	3817000	8891000	11430000	9914000	27380000	68500000	35180000	56470000	76600000	92760000	57560000	75120000	81680000	37050000	31290000	28470000	25630000	2566-34-9	HMDB0002141	-	-	-	-
Com_553_pos	N-Methyl-L-arginine hydrochloride	Amino Acid And Derivatives	POS	224.688	C7H17ClN4O2	0.95	174500	180000	158700	355900	288400	290800	210000	268300	206500	275200	265300	654300	749100	307400	412500	145200	136900	125400	114300	153900	135900	110400	281000	105500	232000	325700	454300	323800	376200	537100	255000	244600	287000	295700	--	--	-	-	-	-
Com_554_pos	Oleoylethanolamide	Amines	POS	325.298	C20H39NO2	14.61	2578	1954	3587	4786	1760	2331	1938	2163	2468	3065	2509	4256	3325	1909	8862	3087	2052	2298	7412	2618	7524	6097	2558	1636	3040	2669	4740	3010	2650	3991	2269	2040	1805	1382	111-58-0	HMDB0002088	-	-	-	-
Com_555_pos	Menaquinone	Vitamins	POS	444.648	C31H40O2	14.74	114700	137100	101700	55950	167600	117600	60690	126400	65730	89230	75910	122600	219100	141500	71260	146100	95990	118500	213900	129300	108700	89930	98600	119194	131200	80650	101200	57810	174000	96200	187900	219700	179600	171500	-	HMDB0259856	C00828	ko01100//Metabolic pathways;ko01110//Biosynthesis of secondary metabolites;ko00130//Ubiquinone and other terpenoid-quinone biosynthesis	Global and overview maps;Metabolism of cofactors and vitamins	Metabolism
Com_556_pos	Quercetin-3-O-neohesperidoside	Flavones and Flavonols	POS	610.153	C27H30O16	6.35	19210	28250	76640	64230	116300	604500	76520	118300	113000	69510	33770	75930	88310	85360	53510	4439	20641	5870	191200	156700	157700	149500	280900	144400	20990	20554	23910	254400	827500	1153000	68270	69090	47300	96330	--	--	-	-	-	-
Com_558_pos	Xanthosine	Nucleotide And Its Derivates	POS	284.225	C10H12N4O6	3.928	17470	20230	13940	32550	16370	35990	23910	30550	22070	29560	11510	51830	97850	40340	58570	28530	28990	15830	41010	54640	28150	27190	100500	28790	40280	49000	68240	30640	46310	55890	36480	36550	37710	32870	146-80-5	HMDB0000299	C01762	ko01100//Metabolic pathways;ko01110//Biosynthesis of secondary metabolites;ko02010//ABC transporters;ko00230//Purine metabolism;ko00232//Caffeine metabolism	Biosynthesis of other secondary metabolites;Global and overview maps;Membrane transport;Nucleotide metabolism	Environmental Information Processing;Metabolism
Com_559_pos	Pyridoxamine	Pyridines and derivatives	POS	168.09	C8H12N2O2	0.8	118900	130200	112800	221800	255400	171100	148100	145500	161600	231700	179100	441800	505000	254700	251000	171200	181000	201800	172100	245500	252300	183600	269600	142600	386200	474300	629200	254600	276300	312100	231400	209500	202400	214800	-	HMDB0062696	C00534	ko01100//Metabolic pathways;ko01120//Microbial metabolism in diverse environments;ko00750//Vitamin B6 metabolism	Global and overview maps;Metabolism of cofactors and vitamins	Metabolism
Com_560_pos	pyridoxal	Vitamins	POS	167.16	C8H9NO3	1.15	237000	766800	537100	651100	628200	797300	299700	450500	601600	416200	273200	726000	618600	492500	371100	636000	806600	424700	539200	818100	587100	618300	1078000	476300	637300	385900	682400	404300	498600	678100	624700	516000	480200	537500	66-72-8	HMDB0001545	C00250	ko01100//Metabolic pathways;ko01120//Microbial metabolism in diverse environments;ko00750//Vitamin B6 metabolism	Global and overview maps;Metabolism of cofactors and vitamins	Metabolism
Com_561_pos	3,7-Di-O-methylquercetin	Flavonoids	POS	330.074	C17H14O7	9.02	188400	281800	257700	164400	160200	343400	339400	391000	305200	428800	417900	742000	537900	189700	312900	99680	107000	79000	61890	91900	92260	86850	237900	88810	68230	81880	118300	62960	60160	91420	164600	155600	154400	163900	2068-02-02	HMDB0029263	C01265	ko01110//Biosynthesis of secondary metabolites;ko00944//Flavone and flavonol biosynthesis	Biosynthesis of other secondary metabolites;Global and overview maps	Metabolism
Com_562_pos	1,4-dihydro-1-Methyl-4-oxo-3-pyridinecarboxamide	Pyridines and derivatives	POS	152.059	C7H8N2O2	1.66	23200	35290	24570	74630	111100	114900	41940	86120	64080	55921	26600	42650	108600	81170	44630	39910	27960	40274	83180	115600	78260	54030	140700	65100	69600	54960	95030	72410	128100	98460	50980	50130	56790	40830	769-49-3	HMDB0004194	C05843	ko01100//Metabolic pathways;ko00760//Nicotinate and nicotinamide metabolism	Global and overview maps;Metabolism of cofactors and vitamins	Metabolism
Com_563_pos	Peonidin O-hexoside	Anthocyanins	POS	463.123	C22H23O11	6.8	227270	339754	242730	356376	126500	418520	386255	388313	424433	369003	122300	763555	913700	268900	193300	700500	1036000	1088000	411800	1178000	606900	892800	2802000	346100	1369000	1946000	1495000	724100	1106000	1696000	450800	381800	199800	412100	--	--	-	-	-	-
Com_564_pos	Melezitose	Carbohydrates And Its Derivatives	POS	504.44	C18H32O16	0.998	13030000	18510000	17220000	29800000	39980000	31470000	37900000	37900000	39570000	19160000	11730000	25220000	51160000	39080000	28250000	5638000	6834000	6311000	31520000	38490000	17630000	38690000	64240000	41760000	15640000	13820000	24700000	21490000	33500000	41560000	32260000	32470000	24240000	34550000	597-12-6	HMDB0011730	-	-	-	-
Com_565_pos	Abietic Acid	Terpenoids	POS	302.45	C20H30O2	14.89	6064	4235	5420	7369	3842	8411	4217	6586	7500	11090	4885	8236	6352	7389	7020	6247	4704	2840	6062	6215	6778	7617	6044	9895	6861	4674	4074	6259	5320	9558	5269	9690	7556	8078	-	HMDB0247751	C06087	ko01100//Metabolic pathways;ko01110//Biosynthesis of secondary metabolites;ko00904//Diterpenoid biosynthesis	Global and overview maps;Metabolism of terpenoids and polyketides	Metabolism
Com_566_pos	Trans-Zeatin	Phytohormones	POS	219.24	C10H13N5O	4.588	976100	1241000	879000	503100	639900	657800	435200	534400	452800	474500	387200	1072000	488000	243200	226600	812700	751500	716500	553900	696500	553600	823900	2132000	757800	392200	582300	862600	119500	137200	295500	626200	607000	593100	472100	1637-39-4	HMDB0012204	C00371	ko01100//Metabolic pathways;ko01110//Biosynthesis of secondary metabolites;ko00908//Zeatin biosynthesis;ko04075//Plant hormone signal transduction	Global and overview maps;Metabolism of terpenoids and polyketides;Signal transduction	Environmental Information Processing;Metabolism
Com_567_pos	Ademetionine	Amino Acid And Derivatives	POS	398.44	C15H22N6O5S	0.8	17240	17250	5164	17010	34330	42840	65990	45070	42480	16210	25730	66850	66040	15580	29840	21820	12270	13190	30200	28490	40690	48630	96330	73760	22380	22170	36760	28660	11440	29960	33540	29740	25510	23430	485-80-3	HMDB0001185	C00019	ko01100//Metabolic pathways;ko01110//Biosynthesis of secondary metabolites;ko01230//Biosynthesis of amino acids;ko00330//Arginine and proline metabolism;ko00270//Cysteine and methionine metabolism;ko00908//Zeatin biosynthesis;ko04122//Sulfur relay system;ko00261//Monobactam biosynthesis	Amino acid metabolism;Biosynthesis of other secondary metabolites;Folding, sorting and degradation;Global and overview maps;Metabolism of terpenoids and polyketides	Genetic Information Processing;Metabolism
Com_568_pos	N-acetylglycine	Amino Acid And Derivatives	POS	117.043	C4H7NO3	0.91	286400000	291900000	276600000	303500000	291500000	318200000	310000000	312300000	293400000	317200000	337900000	341700000	350200000	315000000	346400000	284200000	285100000	278700000	308400000	301400000	305400000	308400000	350700000	316600000	312500000	328300000	328800000	309400000	307100000	311100000	309500000	308400000	305100000	311800000	543-24-8	HMDB0000532	-	-	-	-
Com_569_pos	Scopolin	Phenylpropanoids	POS	354.096	C16H18O9	5.51	15230	41143	9279	24510	11590	22170	7138	7546	22302	8796	17222	18540	12530	9960	24290	21974	25394	27403	51050	151800	126200	29020	82560	42880	13185	15690	28130	118500	145300	457700	36050	45850	33680	24180	-	HMDB0303366	C01527	ko01110//Biosynthesis of secondary metabolites	Global and overview maps	Metabolism
Com_570_pos	N-Acetylthreonine	Amino Acid And Derivatives	POS	161.069	C6H11NO4	1.73	66290	68120	73550	80670	95870	91490	70310	77280	75420	62200	45440	104000	181500	79070	119800	65410	98470	60060	81710	124600	84990	103800	211500	117400	78360	108700	169000	79250	87070	107700	73940	93070	65410	61160	17093-74-2	HMDB0062557	-	-	-	-
Com_571_pos	1-O-Caffeoyl quinic acid	Alcohols and polyols	POS	354.095	C16H18O9	5.43	28720000	40380000	25670000	15860000	21960000	21880000	18890000	14200000	20170000	23130000	17120000	34770000	29230000	12910000	12350000	25610000	34740000	15790000	9252000	13580000	6429000	9193000	15060000	9415000	16040000	9280000	19010000	5694000	4481000	6167000	16530000	15540000	12200000	20810000	--	--	-	-	-	-
Com_572_pos	7-methylguanine	Purines and purine derivatives	POS	165.065	C6H7N5O	4.11	3144000	5062000	3497000	20820000	21500000	28990000	48730000	51270000	45370000	67170000	48200000	100100000	157500000	98380000	114200000	4063000	4718000	3711000	21070000	24960000	21850000	67120000	133600000	73860000	123800000	135600000	183400000	113800000	129600000	147100000	71520000	68020000	61940000	60440000	10030-78-1	HMDB0006040	-	-	-	-
Com_573_pos	p-Aminocinnamic acid	Cinnamic acids and derivatives	POS	163.176	C9H9NO2	4.05	7657	7062	3352	6342	6093	11740	6850	10730	4234	17400	10280	19770	29100	15530	22110	8298	9844	4679	7168	4305	4066	16090	22700	7446	15610	23320	26660	12760	13950	28250	14750	15150	8885	17150	--	--	-	-	-	-
Com_574_pos	(+)-Anwulignan	Lignans	POS	328.408	C20H24O4	6.42	548900	622000	490200	476800	261400	472400	281900	369700	282500	378000	307700	702200	431000	208000	171100	500700	473500	362000	156300	250000	221400	180800	411200	205900	220900	255600	425700	150000	119700	206600	267700	299900	312500	289800	--	--	-	-	-	-
Com_575_pos	Asp-glu	Amino Acid And Derivatives	POS	262.217	C9H14N2O7	0.96	109100	135000	83530	163800	144700	170100	153100	178900	146500	146700	120300	235200	374600	165800	202800	123600	151400	118000	179300	220200	206500	161700	463800	180000	161400	223200	263300	227400	245300	330000	185900	156700	149200	173000	-	HMDB0028752	-	-	-	-
Com_576_pos	L-Hydroxylysine	Amino Acid And Derivatives	POS	163.195	C6H14N2O3	0.9	290100	323100	293500	504000	456400	510700	465900	447300	455900	294100	323200	381500	543400	410700	576600	246200	225300	210200	482100	402600	427000	482500	791000	730700	336100	345400	483400	446700	527700	495200	453400	387200	408500	377400	--	--	C16741	ko01100//Metabolic pathways;ko00310//Lysine degradation	Amino acid metabolism;Global and overview maps	Metabolism
Com_577_pos	Dl-3-Hydroxynorvaline	Amino Acid And Derivatives	POS	133.146	C5H11NO3	0.85	10930000	11190000	9544000	19880000	20660000	21960000	18750000	18770000	16380000	19160000	18560000	21650000	16990000	13300000	14500000	9928000	10090000	10210000	19670000	21480000	20800000	18200000	22120000	19460000	17840000	18890000	19880000	14390000	16820000	17500000	16150000	15560000	15760000	13940000	--	--	-	-	-	-
Com_578_pos	D-Homocysteine	Amino Acid And Derivatives	POS	135.185	C4H9NO2S	1.86	49730	89900	49720	240900	232400	353100	463800	501900	433800	609500	449200	1085000	1324000	708500	854100	64520	103000	57080	245800	315900	211800	657000	1809000	759900	1107000	1163000	1846000	743600	1017000	1233000	549100	521500	544400	537900	--	--	-	-	-	-
Com_579_pos	Deoxyadenosine	Nucleotide And Its Derivates	POS	251.242	C10H13N5O3	2.78	29969	13260	36662	3942	8609	14550	25160	10220	29420	183300	98580	323500	650000	229500	101900	18430	14790	33399	8100	68816	12860	22980	93920	34900	53150	77550	137200	326200	344200	478500	91430	93210	99400	82900	958-09-8	HMDB0000101	C00559	ko01100//Metabolic pathways;ko02010//ABC transporters;ko00230//Purine metabolism	Global and overview maps;Membrane transport;Nucleotide metabolism	Environmental Information Processing;Metabolism
Com_580_pos	Cycloleucine	Amino Acid And Derivatives	POS	129.157	C6H11NO2	0.84	272700000	268900000	235700000	82420000	59600000	48360000	75670000	73730000	93120000	61560000	52500000	89030000	138700000	102200000	122600000	332000000	325700000	314200000	61270000	71870000	68930000	108400000	130400000	89740000	93750000	108200000	160900000	107100000	116400000	141700000	143600000	196200000	191800000	180500000	52-52-8	HMDB0062225	-	-	-	-
Com_581_pos	2-Pyrrolidinone	Organoheterocyclic compounds	POS	85.1	C4H7NO	2.369	40370	10400	41003	44390	58070	58080	109400	117300	90530	67740	51240	109600	214800	107300	132800	61781	19670	13400	49300	50320	50070	128800	298400	152300	165600	175000	247300	166800	205500	230200	123400	104300	82920	80290	616-45-5	HMDB0002039	-	-	-	-
Com_582_pos	Terpinyl Acetate	Terpenoids	POS	196.29	C12H20O2	1.16	657400	354100	911600	693900	245800	392100	362800	556500	798500	624900	478900	503900	211000	642600	329800	308200	418900	248900	463700	324300	258100	428900	639560	261600	502100	472700	567800	563400	579100	450200	761300	307900	983300	630200	--	--	-	-	-	-
Com_583_pos	Raceanisodamine	Alkaloids and derivatives	POS	305.369	C17H23NO4	5.27	4274	12770	8894	9217	5296	4983	7594	8226	7449	13491	6702	3354	121600	38850	83400	7142	11060	13559	11366	10494	10454	15463	3068	5589	14879	3537	5296	17922	19016	28427	16110	8354	4166	9528	--	--	-	-	-	-
Com_584_pos	2-Ethylbutyric Acid	Fatty Acyls	POS	116.16	C6H12O2	11.142	160100	241900	170800	340300	255800	205800	287000	244200	204900	272800	257400	244600	176200	230600	209600	322800	341000	266900	313400	303600	241800	306600	224400	317100	306700	239900	233500	251100	281400	238200	287000	209200	223300	206200	1988-09-05	HMDB0031221	-	-	-	-
Com_585_pos	Lipoamide	Organoheterocyclic compounds	POS	205.341	C8H15NOS2	4.89	14880	7022	62514	73670	74480	81990	161600	140600	148900	379400	315300	623500	967900	448500	585300	8284	9384	5099	58120	90410	61230	205100	483600	195700	692400	763500	1204000	520600	555200	744400	290400	274600	272600	256400	940-69-2	HMDB0000962	-	-	-	-
Com_586_pos	Betaine	Alkaloids and derivatives	POS	117.15	C5H11NO2	0.907	337400000	352600000	315500000	364700000	356600000	377700000	383300000	345200000	351100000	379100000	380900000	403900000	414200000	375900000	391000000	328700000	339800000	341700000	371200000	344800000	359300000	364100000	409900000	386500000	379400000	386900000	404000000	361900000	347500000	365600000	370300000	375700000	368800000	365000000	6915-17-9	HMDB0000043	C00719	ko01100//Metabolic pathways;ko02010//ABC transporters;ko00260//Glycine, serine and threonine metabolism	Amino acid metabolism;Global and overview maps;Membrane transport	Environmental Information Processing;Metabolism
Com_587_pos	5-Methyluridine	Nucleotide And Its Derivates	POS	258.228	C10H14N2O6	1.02	99950	131500	81300	48050	78610	95410	59030	58230	71200	49330	40380	61470	79760	82690	76510	88210	98660	96150	40240	66200	73740	62210	125000	60300	40400	60200	120500	99910	88580	72490	68270	50110	64310	53280	1463-10-1	HMDB0000884	-	-	-	-
Com_588_pos	4aR-(4aalpha,6beta,8aalpha)]-4a,5,6,7,8,8a-Hexahydro-4,8a-dimethyl-6-(1-methylethenyl)-2(1H)-naphthalenone	Terpene	POS	218.33	C15H22O	11.66	9831000	9799000	9139000	9636000	10170000	10130000	9131000	9824000	9782000	9922000	10580000	10040000	10340000	10260000	10240000	9994000	9761000	9351000	9639000	9089000	9747000	10080000	9979000	10400000	10360000	9775000	9338000	9787000	9895000	9952000	9640000	9368000	9584000	9995000	--	--	-	-	-	-
Com_589_pos	Kynurenine	Ketones	POS	208.214	C10H12N2O3	3.78	2979	3061	9137	6165	4792	9360	10210	5180	9824	12990	8094	22950	48410	26480	24980	3730	3237	7357	8368	2921	4569	15290	31300	13880	60590	43030	70890	39420	60140	72200	21400	23070	25320	14620	2922-83-0	HMDB0000684	-	-	-	-
Com_590_pos	Histamine	Amines	POS	111.145	C5H9N3	1.04	580800	1371000	1221000	1376000	1457000	1763000	897200	1165000	1653000	2416000	1306000	3115000	2559000	2020000	1908000	1483000	2119000	1358000	1339000	2129000	1589000	2052000	4319000	1514000	2345000	2088000	2830000	2801000	3212000	4360000	2012000	1828000	1711000	1870000	51-45-6	HMDB0000870	C00388	ko01100//Metabolic pathways;ko01110//Biosynthesis of secondary metabolites;ko00340//Histidine metabolism	Amino acid metabolism;Global and overview maps	Metabolism
Com_591_pos	N-Acetylputrescine	Amino Acid And Derivatives	POS	130.188	C6H14N2O	0.75	145900	137500	73460	169200	126300	198100	152400	161500	107400	211100	134100	350600	451700	299200	299800	122600	148900	138700	124600	213800	176000	94050	250800	136200	191600	277000	326800	255800	297000	333300	187500	157500	160100	202900	18233-70-0	HMDB0002064	C02714	ko01100//Metabolic pathways;ko00330//Arginine and proline metabolism	Amino acid metabolism;Global and overview maps	Metabolism
Com_592_pos	N-Acetyl-L-Tyrosine	Amino Acid And Derivatives	POS	223.225	C11H13NO4	5.17	27660	37160	47012	18400	22480	43350	30080	27880	28850	8065	10420	24380	30360	16950	26340	103200	101700	62370	53510	76910	60640	64150	81070	68200	78030	76370	141100	23680	34330	66660	56410	49480	35130	20270	537-55-3	HMDB0000866	-	-	-	-
Com_593_pos	N-Acetyl-L-valine	Amino Acid And Derivatives	POS	159.183	C7H13NO3	0.96	126200	273600	179200	144400	54170	161000	106600	137600	111400	129500	61890	198800	215600	144500	151700	141200	143600	137000	134700	108000	123600	141300	311700	135900	165800	81330	237200	162000	194900	269300	147100	150100	138500	125800	96-81-1	HMDB0011757	-	-	-	-
Com_594_pos	N-Acetyl-5-hydroxytryptamine	Amino Acid And Derivatives	POS	218.252	C12H14N2O2	5.98	13360	7628	4681	12760	16680	30450	6655	18230	16470	18590	22720	26130	39820	8671	11730	12510	15320	20760	30090	16550	17300	16020	49970	15040	27000	36840	40220	12830	16780	17500	13710	15140	12340	16340	1210-83-9	HMDB0001238	C00978	ko01100//Metabolic pathways;ko01110//Biosynthesis of secondary metabolites;ko00380//Tryptophan metabolism	Amino acid metabolism;Global and overview maps	Metabolism
Com_595_pos	N8-Acetylspermidine	Organic Acid And Its Derivatives	POS	260.204	C9H23Cl2N3O	1.06	33920	13720	20290	18200	28250	17860	19379	13080	36120	30660	20250	28820	42430	38620	63540	20390	16335	11630	10780	14790	13790	21430	49090	16890	18881	20840	11010	9829	13730	21080	48020	31320	20220	27310	13431-24-8	HMDB0002189	-	-	-	-
Com_596_pos	N1-Acetylspermine	Amines	POS	244.377	C12H28N4O	0.88	22850	21430	29950	30582	22380	41130	70560	38780	45720	29760	32980	48470	76830	52620	51950	25410	21860	33680	21190	28780	30390	55420	156400	32750	40790	73000	82460	108100	79350	104500	59260	41340	54850	26980	25593-72-0	HMDB0001186	-	-	-	-
Com_597_pos	Naringenin C-hexoside	Flavanones	POS	434.4	C21H22O10	6.47	285600	403400	289500	188000	248300	302600	200200	296800	227600	310700	259800	624100	529100	228800	239900	639000	728900	493900	264100	409300	297100	397200	1062000	445700	394800	500300	790300	117800	177700	215400	326300	252500	282100	284400	--	--	-	-	-	-
Com_598_pos	Tetraethylammonium fluoride	Pyrimidines and pyrimidine derivatives	POS	149.25	C8H20FN	1.04	1435000	1802000	615500	1625000	1239000	1534000	2024000	1860000	2055000	1956000	2382000	3929000	4128000	1018000	2899000	1273000	1776000	1685000	1917000	1713000	1952000	1879000	5277000	2595000	2097000	2812000	3026000	2864000	1810000	3477000	2183000	2298000	2432000	1718000	--	--	-	-	-	-
Com_599_pos	6-Aminohexanoic acid	Amino Acid And Derivatives	POS	131.173	C6H13NO2	2.1	45560	71010	41730	155500	154100	201000	319800	296300	276300	360300	290300	580400	870800	529500	580500	34210	38270	27210	139800	157700	123500	371100	834800	431200	549900	654400	913700	576000	721000	856800	380500	355400	307500	301200	60-32-2	HMDB0001901	C02378	ko01100//Metabolic pathways;ko01120//Microbial metabolism in diverse environments	Global and overview maps	Metabolism
Com_600_pos	Camelliaside A	Flavones and Flavonols	POS	756.668	C33H40O20	6.31	20169	17081	15176	23030	15405	39109	23294	22920	32018	33198	29924	61168	3924	20990	8559	48743	46233	48158	5336	27170	14880	38850	158600	35020	130800	161800	211900	62560	89640	133800	36110	32030	26480	30760	55696-58-7	HMDB0039951	-	-	-	-
Com_601_pos	5'-Deoxy-5'-(Methylthio)Adenosine	Nucleotide And Its Derivates	POS	297.333	C11H15N5O3S	4.91	172200	203900	160400	313700	329100	466400	482400	484800	488500	271700	232300	507700	467900	225300	193200	208600	179300	186100	363500	424200	359900	578800	1380000	621100	188400	238900	381600	205000	464900	330800	293300	259800	257000	258500	2457-80-9	HMDB0001173	C00170	ko01100//Metabolic pathways;ko00270//Cysteine and methionine metabolism;ko00908//Zeatin biosynthesis	Amino acid metabolism;Global and overview maps;Metabolism of terpenoids and polyketides	Metabolism
Com_603_pos	Abscisic acid glucose ester	Phytohormones	POS	426.458	C21H30O9	5	7515	6443	6541	7808	13326	10663	5562	9947	2882	11850	7721	21790	52620	22320	15870	8586	8813	4375	7316	3041	3623	6888	35559	5172	14560	23060	29330	13030	33830	18260	16660	8418	4559	11410	--	--	C15970	ko01100//Metabolic pathways;ko01110//Biosynthesis of secondary metabolites;ko00906//Carotenoid biosynthesis	Global and overview maps;Metabolism of terpenoids and polyketides	Metabolism
Com_604_pos	9,17-Octadecadiene-12,14-diyne-1,11,16-triol	Fatty Acyls	POS	290.397	C18H26O3	13.78	13590	17870	1999	11950	6902	6926	3697	9107	6670	14970	7192	13360	55980	28000	330200	8587	9469	15536	15810	24230	8290	8567	41400	25040	5529	10670	10520	9705	44390	32540	19430	10800	11740	20100	--	--	-	-	-	-
Com_605_pos	8-Chlro-1-tetrahydronorharmanone	Indoles and derivatives	POS	220.655	C11H9ClN2O	2.67	58190	81130	56650	152600	138600	176800	192300	219900	178700	450600	294200	737600	1302000	616800	824200	51550	55290	50440	139600	167700	160600	326900	746000	348700	871000	981600	1437000	763300	916700	1246000	459700	426400	405500	398800	--	--	-	-	-	-
Com_606_pos	Plumbagin	Quinones	POS	188.18	C11H8O3	10.441	151800	158100	111700	86540	92010	116100	58070	69570	55610	67040	45960	110500	35410	17050	30610	95580	92690	78820	78720	77480	69910	93950	134300	92000	37100	32110	38040	11260	12400	22770	58680	58110	57220	45090	-	HMDB0256646	-	-	-	-
Com_607_pos	Azelaic acid	Organic Acid And Its Derivatives	POS	188.22	C9H16O4	7.433	15260	26060	20770	18960	19380	14600	19470	31190	28640	15420	21570	21950	31550	35440	27980	24490	15200	17650	32850	22800	15460	22020	30190	20040	31340	16600	24600	33170	28150	23220	26260	18870	19720	22580	123-99-9	HMDB0000784	-	-	-	-
Com_608_pos	N',N",N"'-p-coumaroyl-cinnamoyl-caffeoyl spermidine	Phenolamides	POS	583.67	C34H37N3O6	4.95	22940	16000	11210	39740	39760	42030	42240	45990	42340	35530	28460	99540	123400	55770	51480	13790	16580	28070	42680	52860	33910	45870	192200	49690	52180	76460	97630	50170	53650	63620	32870	32060	39700	47350	--	--	-	-	-	-
Com_609_pos	p-Coumaroylputrescine	Cinnamic acids and derivatives	POS	234.1	C13H18N2O2	4.62	140600	231800	163000	195000	180000	267300	293200	255800	281600	305400	275000	724600	790500	480400	494300	204300	279600	243100	457400	629100	553100	1399000	4324000	1787000	646600	718100	1075000	337200	469200	557900	494100	427900	478800	465100	--	--	C18326	ko01100//Metabolic pathways;ko00330//Arginine and proline metabolism	Amino acid metabolism;Global and overview maps	Metabolism
Com_610_pos	Agmatine	Amines	POS	130.1	C5H14N4	0.92	36780	79690	48950	99790	61920	88220	86830	69110	68430	59500	30260	69950	68560	64370	34680	38390	65600	40920	45990	80700	42890	61970	86160	49140	51430	48360	63760	24820	34950	64050	84230	60460	59750	64770	-	HMDB0246298	C00179	ko01100//Metabolic pathways;ko00330//Arginine and proline metabolism	Amino acid metabolism;Global and overview maps	Metabolism
Com_611_pos	N'-p-Coumaroyl putrescine	Cinnamic acids and derivatives	POS	234.1	C13H18N2O2	4.62	175000	281100	156700	194400	186400	280200	322300	327800	315300	307900	296800	794400	823200	485300	492500	257500	302800	252200	484800	610600	740700	1500000	4916000	1869000	661300	793900	1162000	335200	457500	584100	561300	523100	530100	452500	--	--	-	-	-	-
Com_612_pos	1-O-Feruloyl quinic acid	Alcohols and polyols	POS	368.1	C17H20O9	6.23	1148000	1836000	1837000	1184000	1769000	1579000	1249000	2592000	1268000	1090000	619600	1304000	2000000	482500	541900	2599000	1493000	1656000	670600	1383000	964000	997900	3025000	1195000	600700	1105000	1050000	640200	383300	759300	1091000	1608000	1027000	1253000	--	--	-	-	-	-
Com_613_pos	Apigenin C-glucoside	Flavonoids	POS	432.113	C21H20O10	6.46	14560000	17640000	15090000	11710000	9963000	17290000	11450000	13250000	11180000	16450000	15110000	32870000	26300000	14590000	15120000	31990000	31720000	28120000	12930000	18810000	13970000	20110000	48580000	20090000	21670000	24040000	40330000	7355000	8133000	10560000	16190000	17660000	15740000	15330000	--	--	-	-	-	-
Com_614_pos	Histidinol	Amines	POS	141.1	C6H11N3O	0.72	503400	762200	480600	859700	597600	865900	669100	725800	687900	662300	504900	1030000	1179000	599300	734800	565800	614900	492700	732300	844500	846200	970300	1737000	1042000	514600	741900	1194000	1043000	1229000	1370000	849200	847700	819100	517100	-	HMDB0253185	-	-	-	-
Com_615_pos	MAG (18:4)	Glycerolipids	POS	350	C21H34O4	11.27	60820	76590	55570	24460	20670	24150	18180	45990	16810	115500	32690	66990	100100	50180	270100	21320	22140	38040	47540	28800	43430	22930	95820	48440	57370	91250	140600	47440	56310	57380	47680	33920	30010	68980	--	--	-	-	-	-
Com_616_pos	delta-Tridecalactone	Fatty Acyls	POS	212.3	C13H24O2	9.2	18830	29530	16860	15130	26600	30160	13550	10740	15740	8316	9807	24010	25310	11930	14270	11520	5575	12370	12360	23720	17920	14850	37100	22770	4480	4163	11150	6911	13850	12230	17610	13830	13940	10000	--	--	-	-	-	-
Com_617_pos	Caffeic aldehyde	Phenylpropanoids and polyketides	POS	164.1	C9H8O3	1.84	573100	879900	647500	2721000	2666000	3903000	5321000	5306000	4670000	6293000	5066000	11850000	14330000	7473000	8918000	832700	914600	774300	2553000	3413000	2671000	7430000	19680000	8445000	12270000	12980000	19570000	8618000	10580000	13470000	6375000	5637000	5421000	5724000	--	--	C10945	ko01110//Biosynthesis of secondary metabolites;ko00940//Phenylpropanoid biosynthesis	Biosynthesis of other secondary metabolites;Global and overview maps	Metabolism
Com_618_pos	MAG (18:2)	Glycerolipids	POS	354.1	C21H38O4	14.64	8272	6054	16160	19900	14550	32870	15470	23270	22540	18230	12020	30780	19840	10300	130200	7939	10240	13410	18120	21710	11990	12940	19650	10540	15540	12500	31580	12130	13090	18180	20160	8818	13980	16660	--	--	-	-	-	-
Com_619_pos	LysoPC 16:1	Phospholipid	POS	493.3	C24H48NO7P	11.57	138800	162100	179800	172700	122700	164500	112700	111900	94860	118500	90720	311400	76060	37680	4528	59540	64900	34370	130600	186100	126200	87770	172900	97500	44970	49300	105400	56380	64790	92280	82900	80420	69550	86620	--	--	-	-	-	-
Com_620_pos	Dl-Alanyl-glycine	Amino Acid And Derivatives	POS	146.144	C5H10N2O3	0.84	176700000	170900000	148700000	60320000	51770000	58650000	64470000	68860000	57620000	62510000	50460000	78810000	119900000	84900000	101100000	233000000	220300000	207000000	54550000	62450000	64910000	73300000	117600000	80770000	84380000	98840000	129600000	96100000	99860000	114300000	119700000	127500000	122800000	117500000	--	--	-	-	-	-
Com_621_pos	Dl-Indole-3-lactic acid	Indoles and derivatives	POS	205.21	C11H11NO3	4.87	1941000	3518000	2172000	14990000	16760000	21460000	34660000	37010000	33420000	86880000	69430000	125400000	168500000	99470000	113700000	1139000	1454000	1231000	13250000	16670000	13840000	47050000	96850000	50650000	128100000	137200000	178900000	96770000	106300000	131700000	64960000	62030000	58510000	58500000	--	--	-	-	-	-
Com_622_pos	DL-Leucine	Amino Acid And Derivatives	POS	131.173	C6H13NO2	2.3	332100	484600	298700	2101000	1925000	2552000	3878000	4348000	3603000	2535000	2001000	4608000	6585000	3639000	4234000	459200	490500	387700	1823000	2169000	1814000	5423000	11980000	5859000	5593000	6125000	9052000	4886000	6266000	7309000	3748000	3591000	3142000	2885000	--	--	-	-	-	-
Com_623_pos	Dl-Norleucine	Amino Acid And Derivatives	POS	131.173	C6H13NO2	0.9	270500000	314400000	280800000	341600000	325600000	360600000	298700000	307000000	307600000	353000000	299500000	375400000	388800000	356800000	342500000	305800000	304500000	265900000	307000000	331200000	303800000	312200000	397500000	319000000	360200000	360400000	350000000	327700000	334300000	320900000	352000000	325900000	313800000	332200000	-	HMDB0251526	-	-	-	-
Com_624_pos	Proline	Amino Acid And Derivatives	POS	115.131	C5H9NO2	0.96	9244000	10660000	7646000	17600000	19620000	18190000	85160000	90550000	72350000	196000000	182800000	239200000	289900000	252300000	290300000	10460000	8133000	10230000	17820000	18620000	18250000	106300000	198900000	130100000	253800000	311600000	304200000	291200000	250600000	256300000	191200000	188400000	181400000	174600000	344-25-2	HMDB0003411	-	-	-	-
Com_625_pos	Valine	Amino Acid And Derivatives	POS	117.146	C5H11NO2	1.09	11290000	16000000	13170000	23790000	27690000	30160000	48920000	43540000	40740000	58390000	42500000	91420000	131200000	88350000	92150000	7731000	9043000	6659000	18110000	21360000	19300000	56580000	108600000	50550000	93590000	96350000	117900000	87340000	115500000	132200000	59550000	53320000	51900000	51640000	72-18-4	HMDB0000883	-	-	-	-
Com_626_pos	Glutamine	Amino Acid And Derivatives	POS	146.145	C5H10N2O3	0.81	327400000	312900000	268900000	115000000	87690000	108900000	109600000	136500000	111700000	117400000	95440000	162500000	223900000	171200000	196700000	394100000	391200000	375700000	101400000	118000000	117300000	132300000	229600000	155500000	165600000	187300000	239400000	130500000	188400000	213900000	229300000	251200000	242600000	220500000	5959-95-5	HMDB0003423	-	-	-	-
Com_627_pos	1,3,5-Trimethoxybenzene	Benzene and substituted derivatives	POS	168.19	C9H12O3	1.22	41300	16250	33480	15610	10110	18141	7507	8146	32570	12830	7435	13963	13296	6068	13136	18060	22220	26380	9903	7218	15740	22140	30287	16679	9538	14090	29138	13840	14290	15351	21450	11490	8964	18680	621-23-8	HMDB0059963	-	-	-	-
Com_628_pos	L-Glycyl-L-phenylalanine	Amino Acid And Derivatives	POS	222.1	C11H14N2O3	4.97	97640	111000	67690	152200	135400	162500	265800	240100	240100	214600	191000	373300	602100	289300	366800	315600	282600	216800	286000	308300	313000	410200	1085000	493200	473900	544900	789000	476300	505200	707100	342800	312200	234500	265900	-	HMDB0028848	-	-	-	-
Com_629_pos	Cyclen	Amines	POS	172.27	C8H20N4	0.71	2124000	3542000	2115000	2898000	2686000	3318000	2762000	2908000	3047000	2300000	1291000	2350000	1790000	1148000	8305000	2113000	2222000	1656000	3032000	2929000	3686000	2658000	6176000	4743000	2125000	2130000	2701000	1495000	2465000	2200000	2822000	3335000	2431000	1480000	-	HMDB0250623	-	-	-	-
Com_630_pos	TriacetonaMine	Alkaloids and derivatives	POS	155.24	C9H17NO	2.28	16230	26900	20390	32380	29430	33510	10570	9858	12170	30800	19340	28000	22650	23190	27060	23960	21650	12440	30500	36550	40990	15720	38930	11920	27630	37560	53880	27640	26100	36150	40720	15700	28700	22630	826-36-8	HMDB0031179	-	-	-	-
Com_631_pos	N,N-Dimethyl-1,4-phenylenediamine	Amines	POS	136.194	C8H12N2	4.43	45970	70910	46040	52290	41330	73080	45990	43080	62260	45680	42620	106300	73490	39180	40650	38350	56530	39930	49570	54610	47680	45000	127600	59750	54520	66490	111200	45400	34490	54520	46800	48720	48870	39570	--	--	-	-	-	-
Com_632_pos	N1,N10-Dicoumaroyl spermidine	Cinnamic acids and derivatives	POS	437.53	C25H31N3O4	6.24	37820	42610	49890	22030	22760	37480	21180	32030	24980	22570	27690	47000	26430	13000	16960	4090	5074	17258	13125	12299	13908	14817	15510	7074	5627	4627	15311	14594	12727	11060	23900	18420	24200	8034	--	--	-	-	-	-
Com_633_pos	S-ribosyl-L-homocysteine	Amino Acid And Derivatives	POS	267.3	C9H17NO6S	0.91	285300	295600	182500	371500	434400	353500	346700	226200	229500	273700	240900	540900	378600	188800	244600	260300	272200	242600	309300	369800	387200	244800	745500	338000	285900	355400	538500	158900	167300	244800	309000	264300	234500	216500	--	--	C03539	ko01100//Metabolic pathways;ko01230//Biosynthesis of amino acids;ko00270//Cysteine and methionine metabolism	Amino acid metabolism;Global and overview maps	Metabolism
Com_634_pos	1-Methylhistidine	Amino Acid And Derivatives	POS	169.18	C7H11N3O2	0.84	11220	38900	33630	29790	20880	35000	30980	30560	18560	23480	30690	31330	47900	43570	53690	18010	12810	19280	33320	35090	27600	20310	45630	40370	14580	30140	33980	16370	32610	42740	29010	26150	25600	19810	332-80-9	HMDB0000001	C01152	ko01100//Metabolic pathways;ko00340//Histidine metabolism	Amino acid metabolism;Global and overview maps	Metabolism
Com_635_pos	gamma-Glutamylglutamic acid	Amino Acid And Derivatives	POS	276.243	C10H16N2O7	1.05	586300	600700	370500	433900	318300	407900	516800	427100	335900	382600	247100	554200	676800	213200	398900	801600	778700	718800	562400	517900	653000	491300	1112000	645600	516900	699000	896600	382600	326900	456800	359300	436600	470900	373200	1116-22-9	HMDB0011737	-	-	-	-
Com_636_pos	Trimethyllysine	Amino Acid And Derivatives	POS	189.275	C9H21N2O2	1.03	98082	147735	80820	137300	101300	130300	181500	294100	150300	170800	128139	237800	384600	217300	218000	145600	78650	107700	160700	111200	139000	211300	570600	324800	237510	227900	480000	198000	174400	307400	165900	166100	146000	136100	19253-88-4	HMDB0001325	C03793	ko01100//Metabolic pathways;ko00310//Lysine degradation	Amino acid metabolism;Global and overview maps	Metabolism
Com_637_pos	L-Tryptophan	Amino Acid And Derivatives	POS	204.23	C11H12N2O2	4.894	1284000	2197000	1485000	10590000	10920000	14300000	23640000	27400000	23740000	59020000	46680000	83600000	116400000	69020000	76800000	734700	1017000	852300	8742000	11840000	10310000	32980000	70100000	36600000	96060000	103700000	129600000	72080000	78310000	95510000	42800000	45850000	39230000	38400000	73-22-3	HMDB0000929	C00078	ko01100//Metabolic pathways;ko01110//Biosynthesis of secondary metabolites;ko01230//Biosynthesis of amino acids;ko00970//Aminoacyl-tRNA biosynthesis;ko01210//2-Oxocarboxylic acid metabolism;ko00260//Glycine, serine and threonine metabolism;ko00380//Tryptophan metabolism;ko00400//Phenylalanine, tyrosine and tryptophan biosynthesis;ko00966//Glucosinolate biosynthesis;ko00901//Indole alkaloid biosyn…	Amino acid metabolism;Biosynthesis of other secondary metabolites;Global and overview maps;Translation	Genetic Information Processing;Metabolism
Com_638_pos	Pipecolic acid	Amino Acid And Derivatives	POS	129.16	C6H11NO2	1.042	15867400	16792100	13746500	9490000	9876000	11650000	16860000	8418000	10570000	24570000	19280000	36830000	50990000	28660000	25880000	20997800	20793000	18837200	13440000	18290000	19500000	14560000	47540000	13990000	14680000	12700000	20420000	27020000	31920000	35710000	17760000	15060000	14450000	15900000	3105-95-1	HMDB0000716	C00408	ko01100//Metabolic pathways;ko01110//Biosynthesis of secondary metabolites;ko00310//Lysine degradation;ko00960//Tropane, piperidine and pyridine alkaloid biosynthesis	Amino acid metabolism;Biosynthesis of other secondary metabolites;Global and overview maps	Metabolism
Com_639_pos	L-Pipecolate	Amino Acid And Derivatives	POS	129.16	C6H11NO2	1.049	2275000	1906000	1648000	1771000	1746000	2232000	3535000	1620000	1828000	5022000	4222000	7010000	9654000	5209000	4850000	2090460	2160660	1886500	2396000	3527000	3893000	2712000	9488000	2772000	2650000	3015000	4452000	5152000	7120000	7312000	3464000	3131000	2855000	2987000	3105-95-1	HMDB0000716	C00408	ko01100//Metabolic pathways;ko01110//Biosynthesis of secondary metabolites;ko00310//Lysine degradation;ko00960//Tropane, piperidine and pyridine alkaloid biosynthesis	Amino acid metabolism;Biosynthesis of other secondary metabolites;Global and overview maps	Metabolism
Com_640_pos	Glutathione	Amino Acid And Derivatives	POS	307.32	C10H17N3O6S	1.51	10920	40560	41310	55970	22320	37330	63840	23370	76070	33020	43230	103400	90185	19760	36910	11880	27880	28610	17410	61500	47640	72410	199000	104300	31040	50590	94330	30040	62360	89060	34500	27410	51090	24330	-	HMDB0062697	C00051	ko01100//Metabolic pathways;ko02010//ABC transporters;ko00270//Cysteine and methionine metabolism;ko00480//Glutathione metabolism	Amino acid metabolism;Global and overview maps;Membrane transport;Metabolism of other amino acids	Environmental Information Processing;Metabolism
Com_641_pos	6”-O-xylosyl-glycitin	Isoflavonoids	POS	578.519	C27H30O14	6.3	13903	17115	13774	6084	15504	17955	19253	16744	19906	16764	2055	30736	11750	19310	7398	31410	61810	50340	9006	63600	18730	34450	98660	43030	58310	87900	125500	18650	6546	13680	8934	17060	16290	13540	--	--	-	-	-	-
Com_642_pos	4-Pyridoxate	Pyridines and derivatives	POS	183.161	C8H9NO4	2.91	52440	69740	43140	65530	62370	97250	116000	153400	118200	250300	202000	374700	537100	290400	365300	80400	93100	69780	65500	86530	77700	113800	222500	124000	236200	275800	384700	233200	247500	342100	167600	159700	150400	151600	82-82-6	HMDB0000017	C00847	ko01100//Metabolic pathways;ko01120//Microbial metabolism in diverse environments;ko00750//Vitamin B6 metabolism	Global and overview maps;Metabolism of cofactors and vitamins	Metabolism
Com_643_pos	4-Pyridoxic acid O-hexoside	Vitamins	POS	345.306	C14H19NO9	1.66	373000	486000	390700	210100	230800	286600	231600	222000	180800	121300	129200	352500	229100	124300	85600	846400	780000	672400	422000	694300	519500	479500	1430000	743600	156900	176900	414500	74350	98680	161500	304000	291700	339800	330100	--	--	-	-	-	-
Com_644_pos	Syringetin 3-O-hexoside	Flavonoids	POS	508.1	C23H24O13	0.98	63520	71240	95040	128800	264100	201200	106800	93650	85230	21440	22970	31300	151900	29440	62680	144400	202700	135200	73940	96930	128000	95030	413900	273000	13650	17010	28900	57670	168000	118500	91490	117100	86370	87390	--	--	-	-	-	-
Com_645_pos	Luteolin O-sinapoylhexoside	Flavonoids	POS	654	C32H30O15	7.63	37410	47240	43240	28480	52260	66820	30040	26440	31930	45250	27330	118100	116600	94620	77880	318300	394700	370800	236900	251000	160900	211000	456200	218200	297700	368200	802400	117900	172400	229300	175600	188500	135200	124000	--	--	-	-	-	-
Com_647_pos	Chrysoeriol 6-C-hexoside 8-C-hexoside-O-hexoside	Flavonoids	POS	786.1	C34H42O21	0.95	10790	23250	19590	49890	39490	29320	16470	22550	14800	20690	7985	14420	56660	31280	39140	15530	15360	29610	37690	14330	30490	23680	83760	62690	7418	16390	13400	29140	33550	21820	20160	29770	11680	10120	--	--	-	-	-	-
Com_648_pos	Luteolin 8-C-hexosyl-O-hexoside	Flavonoids	POS	610.2	C27H30O16	6.4	52260	99910	40450	24340	35810	46300	44300	45350	27150	55150	31490	88020	65550	18110	31670	90720	78920	76300	42680	45950	50870	38880	89910	34340	41090	33140	96160	52920	33450	58560	45590	52990	31560	36050	--	--	-	-	-	-
Com_649_pos	Eriodictyol O-malonylhexoside	Flavonoids	POS	536	C24H24O14	7.12	23290	40430	30580	31220	31080	34030	14750	47460	10670	15400	11690	38370	73550	56850	30680	147700	160300	90830	247500	326700	212000	167700	304100	182700	399600	319900	658200	276000	387300	527500	143600	158100	118300	146900	--	--	-	-	-	-
Com_650_pos	O-Phosphocholine	Cholines	POS	219.604	C5H15ClNO4P	0.87	4534000	4591000	4670000	6739000	6307000	7887000	5944000	5139000	5338000	5218000	5354000	11110000	11670000	6955000	5672000	2257000	2209000	2239000	5849000	5801000	7127000	5455000	11770000	5820000	4344000	3914000	5844000	8094000	9622000	13480000	6041000	5650000	5490000	5767000	3616-04-04	HMDB0001565	C00588	ko01100//Metabolic pathways;ko00564//Glycerophospholipid metabolism	Global and overview maps;Lipid metabolism	Metabolism
Com_651_pos	Maltol	Organoheterocyclic compounds	POS	126.11	C6H6O3	5.43	60550	118100	55100	76080	52880	114100	49460	33270	58740	56857	46122	82090	120001	27800	70885	89290	59720	56910	46430	63220	92090	98250	189700	112200	82971	84131	147484	69574	64601	94007	61360	44180	95010	93860	118-71-8	HMDB0030776	C11918	ko01110//Biosynthesis of secondary metabolites	Global and overview maps	Metabolism
Com_652_pos	Pyridoxine O-glucoside	Vitamins	POS	331.323	C14H21NO8	1.68	366700	741000	339000	957900	695100	914100	406200	545000	337300	509200	377600	1511000	1667000	696800	661000	1323000	1011000	989700	1387000	1422000	938300	753600	2671000	992200	1786000	1769000	4300000	665700	1041000	1209000	911500	865600	761500	712400	--	--	-	-	-	-
Com_653_pos	3-Hydroxykynurenine	Carbonyl compounds	POS	224.1	C10H12N2O4	5.96	45990	39060	27115	57100	19550	28540	37880	21350	37340	35210	27740	93210	92470	61180	42050	27039	29878	39280	19210	27850	23740	10850	36350	16730	13390	39290	83620	44100	49860	83240	22710	37390	24150	22120	484-78-6	HMDB0000732	-	-	-	-
Com_654_pos	Benzamide	Benzene and substituted derivatives	POS	121	C7H7NO	4.56	109800	151700	69720	91560	125300	147000	89000	90540	67530	84920	71770	160400	211500	115400	146400	17810	44010	24550	41970	70360	47240	58280	148900	76050	81990	85790	111800	71030	66310	90860	99850	86370	77940	79100	55-21-0	HMDB0004461	C09815	ko01120//Microbial metabolism in diverse environments	Global and overview maps	Metabolism
Com_655_pos	6-Hydroxymethylherniarin	Coumarins and derivatives	POS	206.1	C11H10O4	5.96	36280	54380	26740	56330	62100	82630	43030	41070	39960	69630	63650	134300	227000	101700	119900	18640	9998	17860	40110	58130	44640	34130	91580	42520	82210	127100	182800	102600	157200	229000	66330	60260	55680	51520	--	--	-	-	-	-
Com_656_pos	Methyl chlorogenate	Alcohols and polyols	POS	368.34	C17H20O9	6.24	460000	643900	581900	320400	414700	708700	621400	366400	279900	257100	259500	408100	346100	119300	179100	251300	474300	434100	263800	192900	222300	177800	770800	300700	260900	178100	337600	109100	108200	138200	329200	258600	226600	245700	--	--	-	-	-	-
Com_657_pos	Aminopurine	Purines and purine derivatives	POS	135.1	C5H5N5	1.24	20280000	23540000	16170000	21960000	22280000	27740000	24680000	22200000	19690000	23430000	23900000	39960000	40260000	23070000	30970000	26330000	23750000	23560000	24630000	28240000	23110000	22670000	64010000	35140000	32290000	41120000	49330000	23240000	32050000	38410000	31700000	27130000	26130000	21990000	--	--	-	-	-	-
Com_658_pos	2-Aminoadipic acid	Amino Acid And Derivatives	POS	161.1	C6H11NO4	0.95	157700	165400	168500	316000	255300	344500	5208000	4433000	3944000	4406000	3005000	6183000	11690000	7637000	7478000	130900	142200	116900	217900	294200	347800	6193000	15970000	8035000	9693000	12350000	15590000	8743000	8929000	10830000	5444000	5523000	5510000	4815000	-	HMDB0302754	C00956	ko01100//Metabolic pathways;ko01110//Biosynthesis of secondary metabolites;ko01230//Biosynthesis of amino acids;ko01210//2-Oxocarboxylic acid metabolism;ko00310//Lysine degradation;ko00300//Lysine biosynthesis	Amino acid metabolism;Global and overview maps	Metabolism
Com_659_pos	N-formylmethionine	Amino Acid And Derivatives	POS	177	C6H11NO3S	2.97	3244	17987	13383	10670	5262	5014	13630	5095	3916	17426	15235	34317	12580	5374	21450	15480	8431	3648	22200	38070	33260	25540	87980	43350	15610	13540	27990	28530	43760	83590	16460	11540	11310	18070	4289-98-9	HMDB0001015	C03145	ko00270//Cysteine and methionine metabolism	Amino acid metabolism	Metabolism
Com_660_pos	Aspartic acid di-O-glucoside	Amino Acid And Derivatives	POS	457.1	C16H27NO14	0.97	14320	46070	22260	60970	50410	141700	362100	633500	477700	2223000	420900	841400	3438000	3020000	2121000	17980	21180	7953	97640	154900	33940	829200	5278000	873700	1724000	1467000	1216000	1515000	4490000	3729000	1398000	1090000	939900	880800	--	--	-	-	-	-
Com_661_pos	Trigonelline	Alkaloids and derivatives	POS	137.136	C7H7NO2	1	17540000	16700000	13890000	11230000	12890000	13290000	12980000	11330000	8649000	13230000	12750000	17880000	23130000	14360000	15440000	7181000	6055000	8079000	7315000	7740000	8814000	10080000	15270000	11670000	7287000	9964000	10360000	15930000	15450000	18050000	11240000	10720000	10370000	9097000	535-83-1	HMDB0000875	C01004	ko00760//Nicotinate and nicotinamide metabolism	Metabolism of cofactors and vitamins	Metabolism
Com_662_pos	N alpha-Acetyl-L-Arginine	Amino Acid And Derivatives	POS	216.238	C8H16N4O3	1.04	439000	703500	729800	538000	892700	622700	516100	518300	574000	303100	228500	523400	629100	632700	355900	512300	799200	553900	455900	727800	313400	969300	1338000	1245000	632800	543500	769200	606300	827100	874500	621900	514800	597100	538500	--	--	-	-	-	-
Com_663_pos	N-p-Cinnamoylagmatine	Cinnamic acids and derivatives	POS	260.3	C14H20N4O	12.67	8078	10980	16360	32310	18410	33100	11730	13930	6012	41350	16700	49030	53370	13240	47460	7125	7658	14790	44320	56510	21590	14780	26410	16260	25880	25630	64550	14220	11760	23090	15400	29300	18090	15120	--	--	-	-	-	-
Com_664_pos	N-p-Coumaroylspermidine	Cinnamic acids and derivatives	POS	291.39	C16H25O2N3	6.78	6623	33965	27737	7313	39339	8719	40818	11320	36156	53850	20740	68920	279100	137000	155100	28167	25230	5271	28029	38345	36509	8862	19090	9209	79930	113500	177100	89720	97620	115200	33000	48500	47160	45670	--	--	-	-	-	-
Com_665_pos	N-Sinapoylagmatine	Phenolamides	POS	336.39	C16H24N4O4	12.6	25700	12030	14410	10080	14960	17270	25950	20460	11040	18660	11680	17980	17170	11600	12680	27580	15880	11040	6722	13230	4174	16660	34790	8788	11120	4454	12500	14280	7831	16900	9158	11050	11420	9368	--	--	-	-	-	-
Com_666_pos	5-Methylcytosine	Nucleotide And Its Derivates	POS	125.13	C5H7N3O	0.991	105500	132800	111800	156100	127000	139300	119200	85920	96960	174900	132200	235200	277300	169500	288900	91940	111100	83280	102600	94210	119900	103100	184100	123100	127400	165100	186000	422600	247900	266800	161600	122700	138500	119400	554-01-8	HMDB0002894	C02376	ko01100//Metabolic pathways;ko00240//Pyrimidine metabolism	Global and overview maps;Nucleotide metabolism	Metabolism
Com_667_pos	Glycyl-L-leucine	Amino Acid And Derivatives	POS	188.22	C8H16N2O3	4.466	58320	92210	61140	89630	76270	121700	182500	161000	193900	152200	135900	276200	416900	192100	252300	187800	192300	138600	149900	178300	165800	261900	699300	302300	287400	362500	529800	296000	326800	456000	212500	200400	181500	168200	-	HMDB0028929	-	-	-	-
Com_668_pos	L-Alanine	Amino Acid And Derivatives	POS	89.09	C3H7NO2	0.86	10210000	12050000	9963000	4833000	5079000	5447000	5192000	5836000	5007000	5416000	5059000	7510000	8736000	6216000	7128000	9134000	9614000	7822000	5051000	5771000	4743000	6914000	10490000	7208000	8970000	10090000	9425000	8558000	10060000	9825000	8433000	7842000	6852000	6298000	302-72-7	HMDB0062251	C00041	ko01100//Metabolic pathways;ko01110//Biosynthesis of secondary metabolites;ko01120//Microbial metabolism in diverse environments;ko01230//Biosynthesis of amino acids;ko02010//ABC transporters;ko01200//Carbon metabolism;ko00270//Cysteine and methionine metabolism;ko00970//Aminoacyl-tRNA biosynthesis;ko00710//Carbon fixation in photosynthetic organisms;ko00250//Alanine, aspartate and glutamate meta…	Amino acid metabolism;Drug resistance: antimicrobial;Energy metabolism;Folding, sorting and degradation;Global and overview maps;Membrane transport;Metabolism of other amino acids;Translation	Environmental Information Processing;Genetic Information Processing;Human Diseases;Metabolism
Com_669_pos	L-aspartic Acid	Amino Acid And Derivatives	POS	133.1	C4H7NO4	0.86	21060000	22190000	20110000	37850000	38430000	45430000	36380000	34260000	31130000	37210000	35970000	42740000	32090000	25400000	26840000	18650000	19530000	18080000	46490000	43040000	40300000	39780000	49890000	41160000	37810000	39660000	39660000	28790000	31150000	32520000	29740000	33160000	29950000	29280000	56-84-8	HMDB0000191	C00049	ko01100//Metabolic pathways;ko01110//Biosynthesis of secondary metabolites;ko01120//Microbial metabolism in diverse environments;ko01230//Biosynthesis of amino acids;ko02010//ABC transporters;ko01200//Carbon metabolism;ko00270//Cysteine and methionine metabolism;ko00970//Aminoacyl-tRNA biosynthesis;ko01210//2-Oxocarboxylic acid metabolism;ko00260//Glycine, serine and threonine metabolism;ko00710/…	Amino acid metabolism;Biosynthesis of other secondary metabolites;Energy metabolism;Global and overview maps;Membrane transport;Metabolism of cofactors and vitamins;Metabolism of other amino acids;Translation	Environmental Information Processing;Genetic Information Processing;Metabolism
Com_670_pos	DL-Citrulline	Amino Acid And Derivatives	POS	175.19	C6H13N3O3	0.9	8632000	10060000	7702000	1265000	1041000	1372000	1879000	2153000	1791000	1735000	1305000	2841000	3061000	1753000	2162000	9589000	8900000	8854000	886700	967700	795900	3397000	4797000	3142000	2681000	3161000	3846000	1731000	1731000	2490000	3636000	3079000	3198000	3106000	-	HMDB0250742	-	-	-	-
Com_671_pos	beta-Nicotinamide Mononucleotide	Nucleotide And Its Derivates	POS	334.219	C11H15N2O8P	0.993	26940	4608	35620	32070	33980	13290	7515	25790	21980	111000	77520	191200	642900	278900	63650	18030	10840	36270	23670	49150	35280	112400	26260	9320	138500	136200	141600	354600	381200	609000	58900	68060	66460	84180	75414-16-3	HMDB0000229	C00455	ko01100//Metabolic pathways;ko00760//Nicotinate and nicotinamide metabolism	Global and overview maps;Metabolism of cofactors and vitamins	Metabolism
Com_672_pos	L-Hydroxyproline	Amino Acid And Derivatives	POS	131.13	C5H9NO3	0.88	1260000	1162000	885800	340300	286400	412700	370300	402300	305800	510000	409700	668900	1442000	874900	1031000	1534000	1548000	1466000	274400	364300	269600	383700	730800	399100	738500	933100	918800	1004000	1088000	1395000	665600	785900	812300	767000	51-35-4	HMDB0000725	C01157	ko01100//Metabolic pathways;ko02010//ABC transporters;ko00330//Arginine and proline metabolism	Amino acid metabolism;Global and overview maps;Membrane transport	Environmental Information Processing;Metabolism
Com_673_pos	D-Proline	Amino Acid And Derivatives	POS	115.13	C5H9NO2	0.967	10700000	15600000	12510000	27290000	30930000	28990000	111400000	112000000	112300000	257200000	225700000	299400000	344700000	294600000	371200000	16720000	15670000	12450000	24280000	29940000	20800000	148800000	257400000	171800000	305700000	357300000	370000000	354500000	310000000	310700000	245100000	247000000	240500000	229500000	344-25-2	HMDB0003411	C00763	ko01100//Metabolic pathways;ko00330//Arginine and proline metabolism	Amino acid metabolism;Global and overview maps	Metabolism
Com_674_pos	L-arginine	Amino Acid And Derivatives	POS	174.2	C6H14N4O2	0.794	26730000	24380000	19570000	26630000	28160000	20670000	17380000	18700000	14660000	26140000	21890000	41450000	38340000	18510000	22820000	42580000	39390000	32050000	12690000	16050000	14960000	9978000	23000000	10740000	25420000	27880000	37400000	19220000	21860000	32080000	21080000	21120000	20040000	20290000	-	HMDB0303361	C00062	ko01100//Metabolic pathways;ko01110//Biosynthesis of secondary metabolites;ko01230//Biosynthesis of amino acids;ko02010//ABC transporters;ko00330//Arginine and proline metabolism;ko00970//Aminoacyl-tRNA biosynthesis;ko00220//Arginine biosynthesis;ko00261//Monobactam biosynthesis	Amino acid metabolism;Biosynthesis of other secondary metabolites;Global and overview maps;Membrane transport;Translation	Environmental Information Processing;Genetic Information Processing;Metabolism
Com_675_pos	L-cysteine	Amino Acid And Derivatives	POS	121.16	C3H7NO2S	0.88	39100	45680	33160	56150	22120	65570	48780	42400	43410	33430	42910	73380	40090	27000	47030	41700	34740	31500	36070	41550	35580	61780	89690	53510	58240	60270	50010	52250	36090	43290	54150	35500	55930	32020	-	HMDB0303385	C00097	ko01100//Metabolic pathways;ko01110//Biosynthesis of secondary metabolites;ko01120//Microbial metabolism in diverse environments;ko01230//Biosynthesis of amino acids;ko01200//Carbon metabolism;ko00270//Cysteine and methionine metabolism;ko00970//Aminoacyl-tRNA biosynthesis;ko00260//Glycine, serine and threonine metabolism;ko00480//Glutathione metabolism;ko00770//Pantothenate and CoA biosynthesis;…	Amino acid metabolism;Biosynthesis of other secondary metabolites;Energy metabolism;Folding, sorting and degradation;Global and overview maps;Metabolism of cofactors and vitamins;Metabolism of other amino acids;Translation	Genetic Information Processing;Metabolism
Com_676_pos	Isohyperoside	Flavones and Flavonols	POS	464.095	C21H20O12	5.91	145400	148800	105400	189700	138300	171200	79580	109300	59510	116000	99590	242200	178300	80720	95290	25820	78500	34210	76990	94800	25970	47360	97280	44720	80930	37290	72980	35550	95390	161300	105600	87770	79060	113000	--	--	-	-	-	-
Com_677_pos	2'-Deoxyinosine 5'-phosphate	Nucleotide And Its Derivates	POS	332.052	C10H13N4O7P	1.71	14090	16060	8017	15740	17150	27270	18330	18370	13730	17810	15690	49180	85600	16270	26940	40080	48810	25700	46710	43150	39300	30270	85150	39850	60510	51820	117500	16840	47680	55100	36180	29510	27650	31570	3393-18-8	HMDB0006555	C06196	ko00230//Purine metabolism	Nucleotide metabolism	Metabolism
Com_678_pos	L-Alanyl-L-Phenylalanine	Amino Acid And Derivatives	POS	236.116	C12H16N2O3	4.65	311300	420600	324900	294400	302200	433400	336500	333600	318400	344300	249700	573200	509800	217800	285900	461200	491400	396600	319000	351500	309500	353400	1055000	425500	337800	357100	607900	201800	233000	350000	365100	323500	311900	317100	3061-90-3	HMDB0028694	-	-	-	-
Com_679_pos	Diisooctyl phthalate	Benzoic acids and derivatives	POS	390.277	C24H38O4	16.86	59660	62530	52060	65160	67560	38790	48320	53740	36290	53750	46870	43420	62760	61260	52920	48690	53020	52820	52510	67500	44480	45280	55990	52740	54600	48020	49530	65280	75370	72520	44460	62250	49600	38510	-	HMDB0251353	-	-	-	-
Com_680_pos	5-Aminoimidazole ribonucleotide	Nucleotide And Its Derivates	POS	295.056	C8H14N3O7P	0.87	31690	21520	26180	33180	74920	34400	57960	34200	28330	17100	17560	38930	67550	39630	14900	26460	24930	10600	31630	29180	20780	41330	119400	45390	25220	28930	49690	39470	47100	58720	43840	42410	25190	40950	25635-88-5	HMDB0001235	C03373	ko01100//Metabolic pathways;ko01110//Biosynthesis of secondary metabolites;ko00230//Purine metabolism;ko00730//Thiamine metabolism;ko00860//Porphyrin metabolism	Global and overview maps;Metabolism of cofactors and vitamins;Nucleotide metabolism	Metabolism
Com_681_pos	Isomangiferin	Xanthone	POS	422.085	C19H18O11	1.51	75433	25250	53310	84320	68230	142900	106600	122200	92270	148500	152300	319000	632500	299400	502600	29490	45700	29180	84870	121400	75700	164100	678000	243200	231200	257900	446000	252200	323000	551800	172300	87360	105700	176800	24699-16-9	HMDB0029477	-	-	-	-
Com_682_pos	HBOA	Organoheterocyclic compounds	POS	165.042	C8H7NO3	4.15	9029000	14050000	10160000	58590000	59370000	79430000	124400000	131200000	118700000	163500000	125800000	220900000	300300000	217400000	240900000	11080000	13540000	10590000	55670000	69280000	62580000	159400000	261500000	171000000	243000000	268000000	322200000	235700000	257800000	275600000	166500000	160200000	144300000	150900000	--	--	C15769	ko01110//Biosynthesis of secondary metabolites;ko00402//Benzoxazinoid biosynthesis	Biosynthesis of other secondary metabolites;Global and overview maps	Metabolism
Com_683_pos	Cyclo(Tyr-Ala)	Amino Acid And Derivatives	POS	234.1	C12H14N2O3	0.97	90370	84560	53490	89670	72540	106800	147800	147100	119400	129800	130300	182000	196700	96520	156500	190700	136300	171400	113000	101300	83450	99830	213400	141900	112400	148700	211800	56620	46060	94550	104200	96940	98170	97230	--	--	-	-	-	-
Com_684_pos	10-Formyl-THF	Organoheterocyclic compounds	POS	473.439	C20H23N7O7	4.83	124800	176800	163600	183300	182500	245700	193500	183400	157900	267400	189000	458500	2104000	592900	891500	181900	227300	165700	257700	288700	274700	289700	1061000	418600	220300	279500	478400	432300	448100	824600	292900	310500	326400	332900	2800-34-2	HMDB0000972	C00234	ko01100//Metabolic pathways;ko01120//Microbial metabolism in diverse environments;ko01200//Carbon metabolism;ko00970//Aminoacyl-tRNA biosynthesis;ko00670//One carbon pool by folate	Global and overview maps;Metabolism of cofactors and vitamins;Translation	Genetic Information Processing;Metabolism
Com_685_pos	Cinnamic Acid	Cinnamic acids and derivatives	POS	148.16	C9H8O2	0.87	1312000	1548000	1207000	958600	716300	1229000	1329000	994600	948400	850400	769800	1023000	850900	529600	602200	326900	290700	364200	858800	984500	850300	1096000	1280000	1290000	399300	464000	619100	468200	465700	724200	770900	889500	746500	695400	140-10-3	HMDB0000930	-	-	-	-
Com_686_pos	14,15-Dehydrocrepenynic acid	Fatty Acyls	POS	276.414	C18H28O2	12.15	890900	1583000	1099000	1110000	932200	1211000	687500	830000	795500	709900	746400	1940000	1680000	725400	1222000	864900	993700	757600	2293000	2704000	2251000	1633000	4794000	1524000	1565000	1372000	1710000	803400	813400	1222000	1088000	1214000	1123000	1094000	--	--	-	-	-	-
Com_687_pos	Diethanolamine	Amines	POS	105.136	C4H11NO2	0.84	1593000	1674000	1498000	1198000	1241000	1183000	1016000	1195000	892000	938600	865600	1402000	1179000	1089000	1094000	1531000	1402000	1334000	1118000	1148000	1108000	1104000	1282000	1217000	1265000	1387000	1422000	1125000	1445000	1483000	1401000	1246000	1059000	930100	111-42-2	HMDB0004437	C06772	ko00564//Glycerophospholipid metabolism	Lipid metabolism	Metabolism
Com_688_pos	16-Hydroxy-hexadecanoic acid	Fatty Acyls	POS	526.832	C32H62O5	8.57	20740	21780	13350	19360	16860	20560	14400	14020	15240	15600	19550	16010	13040	16500	15170	14320	15490	21400	22360	18630	16870	22440	16710	14770	19670	10610	18020	21120	17320	15100	18210	10410	10590	17350	506-13-8	HMDB0006294	C18218	ko01100//Metabolic pathways;ko00073//Cutin, suberine and wax biosynthesis	Global and overview maps;Lipid metabolism	Metabolism
Com_689_pos	Diosgenin	Terpene	POS	414.621	C27H42O3	11.39	4533000	3512000	5020000	5441000	4950000	5460000	4814000	4979000	4471000	4760000	5471000	7317000	6913000	4366000	4540000	4474000	4293000	4939000	4551000	5454000	4637000	5226000	7843000	4650000	5360000	5585000	6026000	5052000	4941000	6335000	6057000	6363000	4983000	4539000	-	HMDB0242671	-	-	-	-
Com_690_pos	DIMBOA glucoside	Carbohydrates And Its Derivatives	POS	374.108	C15H19NO10	4.26	46070	58150	30560	98470	90000	140500	74830	73280	54390	82290	73090	160500	339200	163500	169500	37440	43860	39990	98720	112400	104200	85950	272900	114600	96430	136200	207600	234200	231400	337400	113000	105900	102300	113800	-	HMDB0301843	-	-	-	-
Com_691_pos	3',4',5'-Tricetin O-rutinoside	Flavones and Flavonols	POS	652.606	C30H36O16	6.66	4554	16927	3422	13649	11411	6151	7483	12507	15425	1950	10495	9059	11310	9793	6133	9558	24820	14070	20890	46860	50490	7995	53170	22340	23450	36370	44830	30860	23230	30190	13790	15290	21360	23310	--	--	-	-	-	-
Com_692_pos	O-Feruloyl coumarin	Cinnamic acids and derivatives	POS	322.317	C19H14O5	5.6	15500	22470	17730	203400	116000	138800	46780	110100	63720	170100	153500	469200	3020000	1344000	3219000	16550	13440	22510	274500	494900	276800	210200	204600	246000	400100	394900	602800	405400	597200	600600	400800	390300	357200	451800	--	--	-	-	-	-
Com_694_pos	N-Caffeoyl agmatine	Cinnamic acids and derivatives	POS	292.3	C14H20N4O3	12.3	79370	73620	64590	42170	34750	61520	35200	48450	45240	34700	28270	61590	19650	37710	35540	47570	35320	26590	38830	46340	32590	38940	58440	35040	14690	15020	29080	16670	18610	24520	37050	53300	31100	33490	--	--	-	-	-	-
Com_695_pos	Apigenin-6,8-di-C-glycoside	Flavonoids	POS	594.518	C27H30O15	5.73	16290	13190	14910	14600	23550	23670	26230	14970	10090	12330	25520	37060	45980	24390	19750	23300	17730	20770	19060	31150	16790	31470	73780	23630	25510	33670	87570	9774	13580	8980	32710	16540	29840	20840	--	--	-	-	-	-
Com_696_pos	Myricetin 3-O-galactoside	Flavones and Flavonols	POS	480.376	C21H20O13	7.19	39620	37430	19200	33440	18330	33260	32580	32670	15450	36240	29980	99450	23250	18930	7027	4536	13690	14553	17104	15846	17797	16124	41536	20807	11615	13635	12900	20962	25753	32145	23820	7473	18850	11640	15648-86-9	HMDB0034358	-	-	-	-
Com_697_pos	3-Carbamyl-1-Methylpyridinium Chloride	Pyridines and derivatives	POS	172.612	C7H9ClN2O	0.98	30360	34000	37250	24300	31370	30560	10080	18740	41430	41320	48170	28710	17670	39510	56690	26516	31140	19120	23850	34910	22000	40730	37820	34250	27604	33540	43700	30520	50210	35720	20970	27130	23810	41580	--	--	-	-	-	-
Com_698_pos	D-Asparagine	Amino Acid And Derivatives	POS	132.118	C4H8N2O3	0.96	332500	314100	424400	548700	528400	515700	500400	463400	438600	409300	346300	377900	523900	407700	523900	233700	275700	252800	480200	511000	476600	446500	851700	625100	305700	347700	334200	421100	462700	579300	426400	506900	428800	443600	2058-58-4	HMDB0033780	-	-	-	-
Com_699_pos	4,6-Dihydroxyquinoline O-hexoside	Quinolines and derivatives	POS	323.303	C15H17NO7	1.09	17390	7300	11970	94610	40450	33530	8892	34890	29330	23520	14020	21920	54360	23560	27540	12920	40580	31150	27510	8885	25340	30970	78630	36540	6513	25030	18110	19930	25330	67480	9630	23040	34820	39440	--	--	-	-	-	-
Com_700_pos	sn-Glycero-3-phosphocholine	Glycerophospholipids	POS	257.22	C8H20NO6P	0.91	11470000	13470000	9921000	14820000	9258000	15480000	14570000	9212000	13310000	9622000	10560000	16020000	23670000	9487000	9776000	4923000	7396000	5037000	10170000	9935000	12820000	14430000	31580000	16780000	9062000	10920000	13990000	16830000	18750000	26910000	11820000	13930000	12640000	12060000	28319-77-9	HMDB0000086	C00670	ko00564//Glycerophospholipid metabolism;ko00565//Ether lipid metabolism	Lipid metabolism	Metabolism
Com_701_pos	Picramnioside F	Glycosides	POS	670.614	C33H34O15	0.97	17800	35480	43900	76440	56960	32910	30570	50880	25230	17600	20630	29160	53110	31760	32050	41150	84460	67590	20970	31820	38740	56030	127700	91890	14830	31230	24860	28090	62700	33330	70000	25390	54610	69440	--	--	-	-	-	-
Com_702_pos	Phosphocreatine	Amino Acid And Derivatives	POS	211.113	C4H10N3O5P	2.5	42090	70590	42070	54270	65760	79440	53860	79380	46060	76940	54700	152900	228500	106600	125000	59500	55940	30750	87080	97450	65440	74290	183400	74730	159000	161100	230600	122700	109000	143800	75780	75610	82370	79760	1967-07-02	HMDB0001511	C02305	ko01100//Metabolic pathways;ko00330//Arginine and proline metabolism	Amino acid metabolism;Global and overview maps	Metabolism
Com_703_pos	Pyridoxine	Vitamins	POS	169.178	C8H11NO3	1.53	109900	205700	104500	335900	241800	346400	531400	502000	577000	600600	457000	1002000	2201000	1181000	1421000	796300	832700	692600	907800	1132000	1072000	1631000	4547000	2052000	1983000	2365000	3195000	1930000	2439000	3128000	1243000	995800	1226000	917400	58-56-0	HMDB0301760	C00314	ko01100//Metabolic pathways;ko01120//Microbial metabolism in diverse environments;ko00750//Vitamin B6 metabolism	Global and overview maps;Metabolism of cofactors and vitamins	Metabolism
Com_704_pos	Quercetin 5-O-hexoside	Flavones and Flavonols	POS	464.376	C21H20O12	6.52	637700	554100	598600	516800	472600	518500	328900	340000	295900	355800	409400	1348000	442700	137600	132500	191080	176492	146590	60910	91720	83948	86640	235305	50700	108966	118840	35300	95360	73970	189660	164500	197000	122800	404300	--	--	-	-	-	-
Com_705_pos	Quercetin-3,4'-O-di-beta-glucopyranoside	Flavones and Flavonols	POS	626.52	C27H30O17	5.39	138700	212700	204800	233400	258500	315700	89600	97160	122000	79030	49640	166700	166100	53300	44530	2564	2829	29997	18440	34300	22230	10930	24500	5721	2347	42632	70700	5622	10800	13770	71940	64750	56940	31720	--	--	-	-	-	-
Com_706_pos	4-Methyl-5-thiazoleethanol	Organoheterocyclic compounds	POS	143.1	C6H9NOS	3.95	4601	13820	7348	3253	3939	7168	2947	6011	2289	5866	5195	10180	9888	6900	7234	9694	7758	9928	4301	5118	4504	7399	13580	9575	5909	8098	8238	8384	5962	6769	6593	9822	5406	5134	137-00-8	HMDB0032985	C04294	ko01100//Metabolic pathways;ko00730//Thiamine metabolism	Global and overview maps;Metabolism of cofactors and vitamins	Metabolism
Com_707_pos	Gallocatechin-gallocatechin	Flavonoids	POS	610.2	C30H26O14	6.24	17922	5428	20033	25935	18706	30459	5964	19746	32133	30533	8710	73156	57638	20710	9555	48032	5331	44828	35360	36090	35350	34660	74340	37900	190900	169500	295100	74350	106800	123000	36990	30920	21770	32370	--	--	-	-	-	-
Com_708_pos	Feruloyltyramine	Cinnamic acids and derivatives	POS	313	C18H19NO4	7.87	14891	16733	13703	19873	6151	5817	5532	6512	21232	14580	11420	24060	92190	67370	37710	23328	23272	25328	9054	6585	14460	25050	75200	17200	106800	171600	216700	130700	127700	250600	35780	35600	27200	26760	66648-43-9	HMDB0029365	-	-	-	-
Com_709_pos	C-hexosyl-apigenin C-pentoside	Flavonoids	POS	564.1	C26H28O14	6.07	4610000	5996000	5071000	3975000	3807000	5334000	4206000	4374000	3648000	5790000	4766000	10380000	12500000	6302000	6470000	12760000	11000000	10580000	7256000	10900000	7461000	9906000	22560000	9359000	11410000	12290000	20210000	5620000	5521000	7869000	7763000	7550000	7037000	6876000	--	--	-	-	-	-
Com_710_pos	Quercetin 7-O-rutinoside	Flavones and Flavonols	POS	610.2	C27H30O16	6.4	35700	115700	56050	218100	85360	273900	89850	120600	36510	63550	35620	84110	83900	210200	28180	5834	17320	10500	140200	192000	128400	138600	457300	303100	43470	16300	29690	371800	596400	1158000	253300	77960	101900	217000	--	--	-	-	-	-
Com_711_pos	LysoPC 18:3	Phospholipid	POS	517.3	C26H48NO7P	12.56	872500	573600	1475000	2279000	1786000	2631000	1903000	2213000	1291000	2501000	2261000	4010000	2563000	1570000	155900	725800	770100	775200	1374000	2181000	1190000	1677000	2209000	1121000	1915000	3066000	5556000	2124000	1977000	3168000	1095000	1166000	1206000	1277000	--	--	-	-	-	-
Com_712_pos	LysoPC 18:2	Phospholipid	POS	519.3	C26H50NO7P	12.14	344300	477200	602000	784700	624500	1073000	763800	710300	669700	749400	661000	1549000	447700	228700	13680	368800	433300	452900	861800	1359000	837600	598900	1220000	502200	502800	583800	985300	239800	236300	413700	456800	437200	444800	429300	--	--	-	-	-	-
Com_713_pos	beta-Alanine methyl ester hydrochloride	Amino Acid And Derivatives	POS	139.58	C4H10ClNO2	0.98	19400000	20050000	14850000	21650000	22840000	22860000	32770000	30790000	24850000	22010000	19820000	30980000	31790000	19080000	21820000	24010000	24830000	23750000	27620000	29380000	25010000	34800000	54460000	39060000	31910000	36560000	41900000	21880000	24550000	29420000	27820000	28350000	23550000	22850000	--	--	-	-	-	-
Com_714_pos	Adenine	Purines and purine derivatives	POS	135.127	C5H5N5	1.032	17250000	19490000	13890000	17280000	13370000	18530000	30020000	20830000	15960000	18640000	24130000	31920000	21610000	13950000	26710000	20150000	19120000	26420000	24530000	20210000	27910000	18540000	46100000	32900000	23960000	35630000	40200000	18110000	14080000	14870000	21090000	22090000	19990000	16230000	73-24-5	HMDB0000034	C00147	ko01100//Metabolic pathways;ko01110//Biosynthesis of secondary metabolites;ko00230//Purine metabolism;ko00908//Zeatin biosynthesis	Global and overview maps;Metabolism of terpenoids and polyketides;Nucleotide metabolism	Metabolism
Com_715_pos	Xanthopterin Hydrate	Organoheterocyclic compounds	POS	197.15	C6H7N5O3	7.57	59020	30710	43450	40640	55890	56600	55930	33110	44720	46990	49690	45850	32900	43510	44950	39270	94840	40630	93890	103900	33600	62390	23750	21110	51940	45950	66100	30580	53670	33600	59890	22120	41110	36900	--	--	-	-	-	-
Com_716_pos	Tanshinone II B	Quinones	POS	310.347	C19H18O4	10.795	2529000	3306000	2548000	2038000	1732000	2055000	2430000	2052000	2129000	2847000	2081000	5337000	2201000	1173000	1136000	1675000	1965000	1613000	2129000	2254000	2503000	2369000	6909000	2930000	2081000	2097000	3330000	1270000	1474000	2321000	1923000	1981000	2129000	1805000	-	HMDB0258716	-	-	-	-
Com_717_pos	Allicin	Organic Acid And Its Derivatives	POS	162.27	C6H10OS2	7.57	246100	236200	273400	246600	192100	256200	217900	251300	272300	245600	231000	226100	256900	235900	203000	246300	318900	207200	250000	264100	265000	253500	231100	243100	237800	238100	270700	297900	155300	226300	319100	272000	247200	172000	539-86-6	HMDB0033963	-	-	-	-
Com_718_pos	Nicotinic acid-hexoside	Carbohydrates And Its Derivatives	POS	285.2	C12H15NO7	0.97	35020	53940	48360	70960	61470	82050	30000	24630	28130	36010	19290	25090	47190	28270	27670	18324	14230	9268	10220	32976	22326	19060	39470	10390	16150	12880	24570	21520	39910	27880	27190	20090	37770	28990	--	--	-	-	-	-
Com_719_pos	N-Hydroxy-L-tryptophan	Amino Acid And Derivatives	POS	220.225	C11H12N2O3	2.66	43100	60820	47720	106000	94270	131600	155600	147500	141800	308400	233000	527400	984700	450600	609500	42710	43180	33610	92130	116500	118600	241500	540600	256900	618900	745700	1032000	550900	668600	805900	321200	322100	277900	263000	-	HMDB0255152	-	-	-	-
Com_720_pos	N-Feruloylcadaverine	Phenolamides	POS	278.351	C15H22N2O3	12.68	30030	28160	17110	8748	12970	21380	13790	12240	12260	15300	5958	8684	21870	14670	13780	7417	21220	21850	14780	30880	33680	16990	55190	9394	11510	4016	22770	12890	10810	20140	17440	18190	20450	13830	--	--	-	-	-	-
Com_721_pos	N-Feruloylspermidine	Phenolamides	POS	321.41	C17H27N3O3	4.52	12350	4831	9064	9649	10820	17170	21430	6882	11950	14050	4863	26300	73840	42120	48880	6250	4921	8034	9916	13050	9799	8631	31770	5582	13070	8058	17500	11370	9013	21090	17090	12260	30610	10560	--	--	-	-	-	-
Com_722_pos	N-Caffeoylagmatine	Phenolamides	POS	292.33	C14H20N4O3	12.38	83080	75960	65570	36650	44400	53170	43590	56950	41470	40510	41040	76140	43510	23420	49380	50420	59770	29020	39220	46220	59850	40390	93270	44680	25040	32190	29260	28180	22470	41780	39830	37470	53670	46590	--	--	-	-	-	-
Com_723_pos	N-Feruloylagmatine	Phenolamides	POS	305.35	C15H21N4O3	1.06	1202000	1424000	948800	1446000	1939000	2155000	2968000	2146000	1519000	1375000	1728000	3888000	2127000	883600	1146000	752200	754900	780400	1704000	1292000	1820000	1139000	3745000	1845000	1820000	2934000	3748000	1514000	1130000	1356000	1549000	1162000	1197000	1121000	--	--	-	-	-	-
Com_724_pos	Naringenin O-malonylhexoside	Flavanones	POS	520.447	C24H24O13	7.46	54840	63280	32430	26530	24730	15000	22590	15650	11360	34900	4390	45110	136800	70560	64820	111600	78610	114300	106000	120200	66830	82190	204800	80630	89970	127100	235800	73800	83420	193600	69560	62550	54250	59080	--	--	-	-	-	-
Com_725_pos	Glycine	Amino Acid And Derivatives	POS	75.07	C2H5NO2	0.88	324600	322200	285000	103800	106300	100300	107700	127300	85940	81980	64400	98660	118300	111300	125800	206800	191900	157100	78500	74930	70150	80440	52040	103500	125700	148200	104600	133300	149300	124900	150400	121100	109500	101200	56-40-6	HMDB0000123	C00037	ko01100//Metabolic pathways;ko01110//Biosynthesis of secondary metabolites;ko01120//Microbial metabolism in diverse environments;ko01230//Biosynthesis of amino acids;ko02010//ABC transporters;ko01200//Carbon metabolism;ko00230//Purine metabolism;ko00970//Aminoacyl-tRNA biosynthesis;ko00260//Glycine, serine and threonine metabolism;ko00310//Lysine degradation;ko00630//Glyoxylate and dicarboxylate …	Amino acid metabolism;Carbohydrate metabolism;Drug resistance: antimicrobial;Global and overview maps;Membrane transport;Metabolism of cofactors and vitamins;Metabolism of other amino acids;Nucleotide metabolism;Translation	Environmental Information Processing;Genetic Information Processing;Human Diseases;Metabolism
Com_726_pos	4-Aminobutyric acid	Amino Acid And Derivatives	POS	103.12	C4H9NO2	0.864	26010000	31790000	24230000	41010000	40910000	42600000	45170000	49420000	48820000	36310000	29740000	45690000	42970000	36720000	33830000	36800000	39790000	33850000	42500000	45390000	42770000	56520000	74200000	56560000	54290000	57990000	61720000	32610000	35310000	37700000	44140000	43710000	37140000	37420000	1956-12-02	HMDB0000112	C00334	ko01100//Metabolic pathways;ko01120//Microbial metabolism in diverse environments;ko00330//Arginine and proline metabolism;ko00760//Nicotinate and nicotinamide metabolism;ko00250//Alanine, aspartate and glutamate metabolism;ko00410//beta-Alanine metabolism;ko00650//Butanoate metabolism	Amino acid metabolism;Carbohydrate metabolism;Global and overview maps;Metabolism of cofactors and vitamins;Metabolism of other amino acids	Metabolism
Com_727_pos	Uracil	Nucleotide And Its Derivates	POS	112.09	C4H4N2O2	1.47	758400	1047000	828700	805400	725500	1512000	1107000	992100	1205000	842200	745100	1482000	1174000	813300	555000	791700	794300	447900	1189000	787200	1068000	1255000	3889000	1077000	878500	890500	1569000	910000	952400	1100000	649200	1147000	992300	1032000	66-22-8	HMDB0000300	C00106	ko01100//Metabolic pathways;ko00240//Pyrimidine metabolism;ko00410//beta-Alanine metabolism;ko00770//Pantothenate and CoA biosynthesis	Global and overview maps;Metabolism of cofactors and vitamins;Metabolism of other amino acids;Nucleotide metabolism	Metabolism
Com_728_pos	isoleucine	Amino Acid And Derivatives	POS	131.17	C6H13NO2	2.11	18650000	28170000	18750000	66770000	66090000	88440000	123700000	132200000	117900000	146500000	119600000	228900000	316200000	196600000	223400000	16340000	18100000	15210000	55340000	68030000	54640000	159600000	295600000	171700000	216600000	249400000	318000000	214500000	255100000	292000000	152400000	145700000	137100000	127200000	443-79-8	HMDB0033923	-	-	-	-
Com_729_pos	D-glutamine	Amino Acid And Derivatives	POS	146.14	C5H10N2O3	0.86	255200000	239000000	197400000	66530000	54940000	63480000	68300000	72160000	63800000	63610000	45550000	95740000	141600000	107400000	115700000	287900000	282200000	288600000	56110000	75110000	75190000	76690000	137700000	87810000	103700000	122800000	163100000	118200000	126000000	144500000	160600000	168500000	150400000	141000000	5959-95-5	HMDB0003423	C00819	ko01100//Metabolic pathways	Global and overview maps	Metabolism
Com_730_pos	L-Citrulline	Amino Acid And Derivatives	POS	175.19	C6H13N3O3	0.89	2461000	2426000	2020000	290500	270000	333500	380400	481100	492400	494600	355400	704800	811300	521000	535400	2490000	2297000	2425000	225800	260900	246400	822100	1372000	748700	681600	842600	1167000	389200	434700	553800	945700	873600	816600	830200	372-75-8	HMDB0000904	C00327	ko01100//Metabolic pathways;ko01110//Biosynthesis of secondary metabolites;ko01230//Biosynthesis of amino acids;ko00220//Arginine biosynthesis	Amino acid metabolism;Global and overview maps	Metabolism
Com_731_pos	L-Leucine	Amino Acid And Derivatives	POS	131.17	C6H13NO2	2.32	9172000	12570000	8639000	54560000	53030000	66500000	104500000	108600000	94540000	67600000	53440000	116300000	160100000	95630000	110500000	12140000	13980000	10970000	50000000	60500000	49860000	136500000	266500000	149300000	136100000	156500000	214000000	127800000	153700000	176600000	97940000	89460000	79480000	78310000	61-90-5	HMDB0000687	C00123	ko01100//Metabolic pathways;ko01110//Biosynthesis of secondary metabolites;ko01230//Biosynthesis of amino acids;ko02010//ABC transporters;ko00970//Aminoacyl-tRNA biosynthesis;ko01210//2-Oxocarboxylic acid metabolism;ko00966//Glucosinolate biosynthesis;ko00280//Valine, leucine and isoleucine degradation;ko00290//Valine, leucine and isoleucine biosynthesis	Amino acid metabolism;Biosynthesis of other secondary metabolites;Global and overview maps;Membrane transport;Translation	Environmental Information Processing;Genetic Information Processing;Metabolism
Com_732_pos	L-Ornithine	Amino Acid And Derivatives	POS	132.16	C5H12N2O2	0.762	11830000	12560000	11300000	13290000	13860000	11110000	8634000	10310000	7761000	14820000	13950000	20730000	21910000	15970000	17960000	21560000	19490000	16950000	5808000	7642000	6775000	4187000	5744000	4763000	13750000	15660000	16820000	16860000	19690000	20430000	13650000	11670000	11100000	11110000	3184-13-2	HMDB0000214	C00077	ko01100//Metabolic pathways;ko01110//Biosynthesis of secondary metabolites;ko01230//Biosynthesis of amino acids;ko02010//ABC transporters;ko00330//Arginine and proline metabolism;ko01210//2-Oxocarboxylic acid metabolism;ko00480//Glutathione metabolism;ko00220//Arginine biosynthesis	Amino acid metabolism;Global and overview maps;Membrane transport;Metabolism of other amino acids	Environmental Information Processing;Metabolism
Com_733_pos	6-Deoxyfagomine	Alkaloids and derivatives	POS	131.095	C6H13NO2	2.06	271000	440600	259600	998900	1003000	1352000	1992000	2027000	1844000	2368000	1889000	3860000	5756000	3306000	3746000	240400	280800	221900	812900	975600	827100	2434000	5553000	2763000	3595000	4270000	5797000	3538000	4563000	5286000	2461000	2254000	2100000	1997000	197449-09-5	HMDB0036382	-	-	-	-
Com_734_pos	(S)-2-Phenyloxirane	Benzene and substituted derivatives	POS	120.058	C8H8O	2.01	1389000	2345000	1483000	1245000	1242000	1946000	1884000	2079000	1884000	2453000	2078000	4416000	6138000	2969000	3403000	8813000	9220000	6934000	28220000	31580000	28530000	27380000	82150000	32990000	25420000	30590000	39990000	26780000	34630000	50570000	16490000	14770000	13890000	13050000	--	--	-	-	-	-
Com_735_pos	Zarzissine	Organoheterocyclic compounds	POS	135.054	C5H5N5	1.83	529900	804400	562700	2446000	2533000	3468000	5003000	4783000	4444000	5881000	4678000	10720000	13220000	7061000	8601000	753200	934000	662500	2468000	3084000	2506000	6932000	16800000	8411000	11160000	12180000	18590000	8148000	9784000	13240000	5916000	5110000	5528000	5376000	--	--	-	-	-	-
Com_736_pos	N-Acetyl-D-galactosamine	Carbohydrates And Its Derivatives	POS	221.09	C8H15NO6	1	38730	54890	53860	49170	62130	45050	33510	47250	43680	65150	47440	85680	130700	39300	63340	40590	35890	30330	31860	34490	44490	36050	100900	35450	36980	52190	91700	56840	42790	104700	27230	48960	47840	32510	14131-60-3	HMDB0000853	C01132	ko01100//Metabolic pathways;ko00052//Galactose metabolism;ko00520//Amino sugar and nucleotide sugar metabolism	Carbohydrate metabolism;Global and overview maps	Metabolism
Com_737_pos	D-Proline betaine	Amino Acid And Derivatives	POS	144.092	C7H14NO2+	1	2195000	5049000	4750000	6123000	6717000	7448000	3136000	5891000	6175000	6607000	4185000	9008000	10200000	8495000	5475000	5931000	7716000	6870000	6813000	10220000	6990000	11670000	17030000	7677000	18050000	11330000	13060000	15290000	19720000	25230000	10890000	9733000	9623000	9725000	--	--	-	-	-	-
Com_738_pos	4-Hydroxymandelonitrile	Phenols And Its Derivatives	POS	149.048	C8H7NO2	1.44	576200	450300	236900	380900	215200	576700	1061000	678800	975000	1105000	959300	1329000	2294000	1877000	2797000	1251000	1680000	1716000	739600	923300	808800	925300	4388000	2240000	3515000	4028000	4468000	2183000	1831000	2524000	1718000	987400	782000	865500	71807-09-5	HMDB0060318	-	-	-	-
Com_739_pos	Calystegine A3	Alkaloids and derivatives	POS	159.09	C7H13NO3	0.73	70640	114600	115800	124100	128200	91070	63840	163000	91140	99820	128300	106900	161800	105500	98330	79610	38440	61420	66400	82010	125700	168600	153200	160100	99030	105200	109300	118900	159700	151200	112500	96410	90940	66840	--	--	C10850	ko00960//Tropane, piperidine and pyridine alkaloid biosynthesis	Biosynthesis of other secondary metabolites	Metabolism
Com_740_pos	Acetaminophen	Phenols And Its Derivatives	POS	151.163	C8H9NO2	2.76	2326000	3437000	2467000	2466000	2004000	2921000	3031000	2909000	2791000	4319000	3511000	7940000	5763000	2906000	3409000	3213000	3309000	2912000	2174000	2729000	2286000	3514000	10180000	3963000	5445000	6305000	9721000	2935000	3221000	5172000	3265000	3286000	3459000	3656000	103-90-2	HMDB0001859	-	-	-	-
Com_741_pos	Benzamidine	Benzene and substituted derivatives	POS	120.152	C7H8N2	4.09	222200	344600	245500	1378000	1426000	2014000	3321000	3628000	3149000	4870000	3631000	7570000	14160000	8327000	9591000	258000	293600	239200	1384000	1633000	1447000	4800000	11340000	5184000	10150000	11360000	17380000	9207000	10090000	12670000	5555000	4799000	4440000	4436000	-	HMDB0248970	-	-	-	-
Com_742_pos	(S)-(+)-2-(anilinomethyl) pyrrolidine	Amines	POS	176.258	C11H16N2	6.48	147200	222200	136700	183900	186500	241400	202700	148300	151700	117500	115500	241000	176800	107500	106700	37710	74640	50100	43290	23980	41480	35850	93860	18610	64670	95310	109400	51370	84030	45030	90150	84980	89370	79640	--	--	-	-	-	-
Com_743_pos	Chalcone	Flavonoids	POS	208.255	C15H12O	6.47	27483	38600	44688	42664	32509	51879	24180	33800	101900	34860	32870	47340	61910	54180	31580	29813	37728	31140	64950	69320	53000	50610	138900	58530	51570	81830	91070	33580	43060	76510	42820	88430	61390	29070	94-41-7	HMDB0003066	-	-	-	-
Com_744_pos	Chrysoeriol O-hexosyl-O-pentoside	Flavonoids	POS	594.526	C27H30O15	7.1	9194	30920	10240	10227	5187	6260	3675	4512	15190	18790	11690	27200	13640	8292	6409	24540	21370	8722	10610	11730	14490	10890	36740	23560	18300	23880	24460	11660	9214	26890	28220	14650	13420	19280	--	--	-	-	-	-
Com_745_pos	Syringetin 7-O-hexoside	Flavones and Flavonols	POS	508.1	C23H24O13	0.97	159000	237400	191000	461600	384100	293400	282900	323200	202800	57730	14120	68940	249500	73550	103700	265700	299300	273700	189200	161600	347600	155800	862700	661900	25750	44750	28110	119100	199100	181200	185100	237700	201100	230800	--	--	-	-	-	-
Com_746_pos	Malvidin O-hexoside	Anthocyanins	POS	492.436	C23H24O12	7.18	45900	68520	40520	26200	31850	48660	30720	30020	20500	32810	24460	73170	21570	28890	19670	9499	8483	17817	8835	8526	12310	15722	3365	3892	5532	9080	7669	13216	3997	16710	8642	5144	14320	15450	--	--	-	-	-	-
Com_747_pos	Syringetin 5-O-hexoside	Flavones and Flavonols	POS	508.1	C23H24O13	0.97	156500	268200	253800	486400	519700	432400	380900	432700	187100	40020	29690	59560	321900	91040	139000	306800	395800	354700	151200	210900	376200	284300	901900	992100	42330	53450	47490	123300	199700	241200	286500	252300	261400	221700	--	--	-	-	-	-
Com_748_pos	Selgin O-hexosyl-O-hexoside	Flavonoids	POS	640.552	C28H32O17	0.97	866500	1234000	1051000	2410000	1720000	2580000	2408000	2632000	2467000	1485000	1469000	1948000	1653000	1241000	1116000	544400	472200	453200	1422000	1734000	1956000	1930000	3216000	2917000	540200	1155000	1630000	1207000	1165000	1688000	1789000	1024000	1645000	1560000	--	--	-	-	-	-
Com_749_pos	N-Sinapoyl agmatine	Phenols And Its Derivatives	POS	336.3	C16H24N4O4	12.67	8413	2463	5288	4950	6105	7299	12210	5046	5571	4552	2409	9246	8815	6042	3483	11040	9581	8181	3408	6099	4533	2398	10310	7571	4401	3429	2938	5725	3887	3890	5369	4643	3346	7007	--	--	-	-	-	-
Com_750_pos	2-Methyladenosine	Nucleotide And Its Derivates	POS	281.268	C11H15N5O4	1.05	110500	144300	140400	273900	260000	258200	206900	392500	375700	256400	132200	351700	471500	227400	385200	116400	191000	97890	236400	328100	297100	253700	882700	560400	183200	273200	405800	241100	391100	558900	281100	232800	393700	271800	--	--	-	-	-	-
Com_751_pos	Hydroxycinnamate	Cinnamic acids and derivatives	POS	164.158	C9H8O3	5.54	599300	548100	681800	387100	514100	655200	393000	438800	488600	546800	413400	893300	685200	277100	318100	380571	383628	342271	235117	273548	172000	261800	744137	264611	300240	324987	475050	153700	186000	217200	333600	306200	245700	312900	501-98-4	HMDB0002035	C00811	ko01100//Metabolic pathways;ko01110//Biosynthesis of secondary metabolites;ko00940//Phenylpropanoid biosynthesis;ko01220//Degradation of aromatic compounds;ko00350//Tyrosine metabolism;ko00130//Ubiquinone and other terpenoid-quinone biosynthesis;ko00950//Isoquinoline alkaloid biosynthesis	Amino acid metabolism;Biosynthesis of other secondary metabolites;Global and overview maps;Metabolism of cofactors and vitamins	Metabolism
Com_752_pos	2'-Deoxycytidine	Nucleotide And Its Derivates	POS	227.217	C9H13N3O4	1.18	21280	35640	18290	7445	25520	19660	19720	30800	18030	79270	101300	70450	115000	95760	285100	15520	12410	13210	23770	27570	7831	18160	11650	34880	65190	38220	109000	91460	147200	130800	56810	19430	53280	60460	951-77-9	HMDB0000014	C00881	ko01100//Metabolic pathways;ko02010//ABC transporters;ko00240//Pyrimidine metabolism	Global and overview maps;Membrane transport;Nucleotide metabolism	Environmental Information Processing;Metabolism
Com_753_pos	Luteolin C-hexoside derivative	Flavonoids	POS	448.4	C21H20O11	6.1	44750000	57250000	43450000	37410000	29910000	37650000	22620000	28800000	27390000	32960000	31050000	58260000	41570000	17390000	17960000	36820000	42560000	30970000	14440000	19340000	17320000	15890000	35480000	16310000	17820000	21640000	41700000	12480000	12710000	19290000	25590000	24150000	23760000	24550000	--	--	-	-	-	-
Com_754_pos	2-Amino-1,3,4-tetradecanetriol	Fatty Acyls	POS	261.4	C14H31NO3	1.18	45600	121200	74310	56230	41569	77600	40280	54620	43840	23960	36986	58990	21080	19520	39390	51750	34220	35050	32960	36100	53340	39439	94410	33940	30446	22180	49479	28739	28630	47660	39220	37590	28940	56500	--	--	-	-	-	-
Com_755_pos	C-pentosyl-chrysoeriol O-hexoside	Flavonoids	POS	594.526	C27H30O15	6.04	48280	54740	47120	55400	26840	73410	16260	28690	27210	46550	27880	117100	1207000	951000	930700	6651000	6875000	5415000	3238000	5711000	3975000	5082000	12120000	5210000	6211000	8302000	12030000	1916000	1894000	2744000	2767000	2265000	2563000	2844000	--	--	-	-	-	-
Com_756_pos	C-hexosyl-chrysoeriol O-hexoside	Flavonoids	POS	624.552	C28H32O16	1	104800	107300	82200	168000	137300	229000	275600	196300	211200	105600	115100	127500	168100	114100	129700	44060	61010	84870	175500	146600	208300	163200	300900	254400	53290	64840	89260	84400	104700	116700	184500	111400	127000	97520	--	--	-	-	-	-
Com_757_pos	Petunidin 3-O-rutinoside	Anthocyanins	POS	625.56	C28H33O16	6.78	56170	92380	62300	199400	164700	544300	131300	74210	82100	106800	134300	293500	261100	148300	194100	41713	9472	19260	181300	113500	146000	80350	250400	168800	16810	84634	119275	165100	289800	787600	107400	145500	95150	161800	39824-84-5	HMDB0038098	-	-	-	-
Com_758_pos	Phellodenol H	Coumarins and derivatives	POS	368.335	C17H20O9	1.02	249900	240900	213200	203400	194800	165500	215200	189500	160200	83370	117100	158400	118700	79060	105500	242200	282500	261000	195700	159200	239800	241600	244400	206200	159900	190400	230000	117400	134100	144100	169600	176000	155300	158200	--	--	-	-	-	-
Com_759_pos	Phellodenol H O-hexoside	Coumarins and derivatives	POS	530.483	C23H30O14	5.96	420200	395900	362900	150600	157400	169600	177700	65090	91050	112000	36040	264100	172900	86400	105600	157400	165800	101800	147900	155800	156300	83750	222400	124300	122700	117200	129200	62230	47900	114100	120100	166600	118200	156100	--	--	-	-	-	-
Com_760_pos	Punicic acid	Fatty Acyls	POS	278.3	C18H30O2	12.65	229000	276700	200800	137500	119800	144300	148600	151500	159500	90950	95050	216900	249000	118200	230300	112100	113600	106500	149300	230500	191400	166400	479800	193500	87950	91100	126600	90180	103800	165300	124300	131900	128700	129500	544-72-9	HMDB0030963	-	-	-	-
Com_761_pos	trans-zeatin N-glucoside	Phytohormones	POS	381.2	C16H23N5O6	4.62	21120	29480	24250	31990	29090	41140	24270	21510	28580	28120	46380	46810	95290	50980	87310	25830	22410	26720	34530	35040	44000	20390	106100	50100	67630	60500	129300	46300	53450	96710	61200	33060	21200	22750	--	--	-	-	-	-
Com_762_pos	LysoPC 16:2 (2n isomer)	Phospholipid	POS	491.3	C24H46NO7P	10.88	7303	4294	5144	12420	9676	14380	7637	6254	5172	7629	13800	20330	18358	9168	18638	6446	3427	2530	7273	14550	8028	4182	9356	7355	3910	5563	7709	3660	2337	5572	8390	4000	10820	6457	--	--	-	-	-	-
Com_763_pos	LysoPC 18:3 (2n isomer)	Phospholipid	POS	517.2	C26H48NO7P	11.33	3560000	4268000	4589000	10490000	8688000	10210000	6395000	6458000	5998000	9108000	8294000	23180000	10200000	3898000	652600	2610000	2599000	2541000	17860000	20720000	13790000	9833000	16780000	9431000	16820000	15280000	24290000	6622000	7167000	9379000	8402000	7471000	7261000	7639000	--	--	-	-	-	-
Com_764_pos	LysoPC 18:1 (2n isomer)	Phospholipid	POS	521.4	C26H52NO7P	12.7	7765000	5737000	10530000	7630000	4659000	5746000	2514000	2217000	1734000	2421000	2387000	6251000	1184000	525600	30190	4783000	4129000	5151000	5023000	9671000	6882000	2573000	5759000	2710000	1144000	1357000	2836000	814100	833600	1412000	2895000	2741000	2458000	2449000	--	--	-	-	-	-
Com_765_pos	LysoPC 18:1	Phospholipid	POS	521.1	C26H52NO7P	12.86	189700	137000	220100	192100	106000	136100	62790	48950	43040	69430	64030	185900	54380	24580	15920	147700	115500	124900	126100	252100	167300	67450	152700	83510	63050	53590	103900	48520	44950	66120	73000	69090	51780	73710	--	--	-	-	-	-
Com_766_pos	LysoPC 18:2 (2n isomer)	Phospholipid	POS	519	C26H50NO7P	11.95	3761000	3750000	5694000	6732000	5122000	6470000	3760000	4036000	3266000	4410000	4452000	10990000	1798000	865700	101500	2586000	2631000	2682000	7071000	10890000	5837000	3639000	7020000	3626000	3597000	3596000	6247000	1686000	1697000	2548000	3221000	3098000	3074000	2894000	--	--	-	-	-	-
Com_767_pos	LysoPE 18:2 (2n isomer)	Phospholipid	POS	477.6	C23H44NO7P	12.08	71380	57790	125800	167300	118700	182000	149500	150700	125300	161000	158500	363900	46890	35970	4219	76840	69210	147900	149200	282000	156500	101700	88200	34030	127700	128400	289400	52260	42860	66550	61550	65180	77680	64200	--	--	-	-	-	-
Com_768_pos	D-Serine	Amino Acid And Derivatives	POS	105.09	C3H7NO3	0.851	45860000	44170000	37050000	29130000	27310000	33800000	26970000	30670000	25930000	24210000	23270000	34440000	27930000	28130000	28370000	36210000	34090000	39310000	31430000	29040000	28210000	31110000	41100000	32610000	32140000	30890000	33050000	32670000	35030000	39470000	34070000	32450000	28550000	28590000	312-84-5	HMDB0003406	C00740	ko01100//Metabolic pathways;ko00260//Glycine, serine and threonine metabolism;ko01502//Vancomycin resistance	Amino acid metabolism;Drug resistance: antimicrobial;Global and overview maps	Human Diseases;Metabolism
Com_769_pos	L-Leucyl-L-alanine	Amino Acid And Derivatives	POS	202.25	C9H18N2O3	3	112500	175500	115200	210100	175300	282300	373900	330400	352500	253600	222500	472100	657900	276700	381800	310500	382800	288100	332100	361600	326700	476400	1336000	510600	415000	508800	757000	444800	474200	705700	387200	337200	313000	311700	-	HMDB0304783	-	-	-	-
Com_770_pos	L-Dihydroorotic acid	Amino Acid And Derivatives	POS	158.112	C5H6N2O4	0.92	27840000	34580000	32570000	33650000	29900000	29510000	42040000	35610000	43860000	31020000	33320000	32770000	26160000	25000000	25030000	46840000	49440000	36640000	42110000	44950000	48400000	46120000	42460000	48190000	55390000	45960000	36340000	43430000	52040000	44160000	41330000	37790000	30320000	26230000	5988-19-2	HMDB0003349	C00337	ko01100//Metabolic pathways;ko00240//Pyrimidine metabolism	Global and overview maps;Nucleotide metabolism	Metabolism
Com_771_pos	beta-Alanine	Amino Acid And Derivatives	POS	89.093	C3H7NO2	0.8	72650	111000	81140	177500	51230	61030	90690	108700	76800	129600	102100	135700	89860	128500	92400	124200	151400	134100	80890	87300	91180	124500	157500	141100	330800	355500	362400	152700	152600	136800	130300	101900	107400	125900	107-95-9	HMDB0000056	C00099	ko01100//Metabolic pathways;ko01110//Biosynthesis of secondary metabolites;ko00240//Pyrimidine metabolism;ko00410//beta-Alanine metabolism;ko00770//Pantothenate and CoA biosynthesis;ko00640//Propanoate metabolism	Carbohydrate metabolism;Global and overview maps;Metabolism of cofactors and vitamins;Metabolism of other amino acids;Nucleotide metabolism	Metabolism
Com_772_pos	D-Threonine	Amino Acid And Derivatives	POS	119.119	C4H9NO3	0.86	2834000	3315000	2908000	3707000	3761000	4159000	3406000	3956000	3073000	3142000	2604000	4021000	3868000	3529000	3321000	3053000	2968000	2529000	3011000	3563000	3017000	4107000	5013000	3995000	3369000	3435000	3914000	3441000	4242000	4268000	3790000	3392000	3283000	2991000	-	HMDB0250801	C00820	ko01100//Metabolic pathways	Global and overview maps	Metabolism
Com_773_pos	Nicotinamide	Vitamins	POS	122.12	C6H6N2O	1.539	1667000	2241000	1614000	2312000	2477000	3137000	2712000	2763000	2655000	2176000	1907000	3746000	3607000	2560000	3152000	2621000	3027000	2469000	3398000	3830000	3894000	4272000	9938000	4805000	3859000	4351000	5570000	2837000	3094000	3692000	3509000	3003000	2889000	2979000	98-92-0	HMDB0001406	C00153	ko01100//Metabolic pathways;ko00760//Nicotinate and nicotinamide metabolism	Global and overview maps;Metabolism of cofactors and vitamins	Metabolism
Com_774_pos	Hypoxanthine	Purines and purine derivatives	POS	136.11	C5H4N4O	1.509	32160	47560	102100	39600	79740	71590	28980	85150	55177	66395	50154	74058	150900	134000	148200	64000	61320	113000	64820	67310	42190	39170	107500	42590	49330	57490	90610	78150	133700	66720	66300	71090	58660	57220	68-94-0	HMDB0000157	C00262	ko01100//Metabolic pathways;ko00230//Purine metabolism	Global and overview maps;Nucleotide metabolism	Metabolism
Com_775_pos	D-Phenylalanine	Amino Acid And Derivatives	POS	165.19	C9H11NO2	4.106	10500000	16340000	11250000	67610000	66700000	91630000	141400000	152900000	134200000	186400000	142700000	263600000	371600000	264300000	287100000	12280000	15540000	12070000	66420000	80630000	68890000	187900000	324200000	201800000	295100000	322200000	401100000	285300000	317300000	338200000	193700000	183200000	172000000	171300000	-	HMDB0250791	C02265	ko01100//Metabolic pathways;ko00360//Phenylalanine metabolism	Amino acid metabolism;Global and overview maps	Metabolism
Com_776_pos	Nicotinic Acid	Vitamins	POS	123.11	C6H5NO2	1.478	104400	159800	98960	177900	100300	223700	235900	315200	476500	267200	234900	291500	1015000	800700	1206000	448800	527000	418500	697200	581800	578400	280800	2327000	816500	1607000	1555000	1041000	987900	1161000	2368000	742100	667600	427500	594400	583-08-4	HMDB0003269	C00253	ko01100//Metabolic pathways;ko01110//Biosynthesis of secondary metabolites;ko01120//Microbial metabolism in diverse environments;ko00760//Nicotinate and nicotinamide metabolism;ko00960//Tropane, piperidine and pyridine alkaloid biosynthesis	Biosynthesis of other secondary metabolites;Global and overview maps;Metabolism of cofactors and vitamins	Metabolism
Com_777_pos	D-2-Aminobutyric acid	Organic Acid And Its Derivatives	POS	103.12	C4H9NO2	0.947	1783000	2260000	1853000	2031000	1790000	2247000	2427000	2685000	2466000	2926000	2447000	3729000	3693000	2595000	3054000	2082000	2200000	1813000	1909000	2127000	2200000	2509000	3980000	2960000	2957000	3204000	3794000	2937000	2978000	3408000	2817000	2462000	2504000	2350000	2623-91-8	HMDB0000650	-	-	-	-
Com_778_pos	DL-Norvaline	Amino Acid And Derivatives	POS	117.15	C5H11NO2	1.068	17530000	21050000	12550000	26190000	22840000	30800000	58800000	52940000	42830000	66390000	54420000	100100000	147700000	101100000	105000000	8655000	10270000	8965000	23480000	20820000	23820000	59180000	118500000	63120000	104400000	116000000	155800000	105700000	114000000	123800000	66740000	63850000	59960000	56900000	-	HMDB0251527	-	-	-	-
Com_779_pos	2-Amino-4-(methylthio)butyric acid	Amino Acid And Derivatives	POS	149.211	C5H11NO2S	1.46	855900	712900	721100	622000	477700	835900	1859000	1719000	1841000	1774000	1761000	3179000	2858000	2483000	3673000	2703000	2556000	2840000	1427000	1383000	1004000	2467000	8991000	3681000	6409000	6532000	11940000	3113000	4660000	5976000	2584000	2840000	2358000	2209000	59-51-8	HMDB0033951	-	-	-	-
Com_780_pos	L-serine	Amino Acid And Derivatives	POS	105.093	C3H7NO3	0.846	5207000	5539000	4458000	4037000	4551000	4127000	3774000	3668000	3254000	3071000	3238000	4534000	4137000	3476000	3596000	4401000	4846000	4024000	3490000	4151000	3474000	3803000	4268000	3806000	4282000	4536000	4048000	4130000	4956000	5075000	4653000	3997000	3405000	3588000	56-45-1	HMDB0000187	C00065	ko01100//Metabolic pathways;ko01110//Biosynthesis of secondary metabolites;ko01120//Microbial metabolism in diverse environments;ko01230//Biosynthesis of amino acids;ko02010//ABC transporters;ko01200//Carbon metabolism;ko00270//Cysteine and methionine metabolism;ko00970//Aminoacyl-tRNA biosynthesis;ko00260//Glycine, serine and threonine metabolism;ko00630//Glyoxylate and dicarboxylate metabolism;…	Amino acid metabolism;Biosynthesis of other secondary metabolites;Carbohydrate metabolism;Drug resistance: antimicrobial;Energy metabolism;Global and overview maps;Lipid metabolism;Membrane transport;Metabolism of other amino acids;Translation	Environmental Information Processing;Genetic Information Processing;Human Diseases;Metabolism
Com_781_pos	L-2-Aminoadipic acid	Amino Acid And Derivatives	POS	161.069	C6H11NO4	0.93	65070	184300	120800	200900	217900	196100	2174000	2455000	2079000	2220000	1642000	3550000	7113000	3531000	4243000	103500	96390	67050	165700	195300	209700	4536000	8757000	4892000	5485000	6918000	9763000	5424000	4608000	6167000	3065000	3167000	2826000	2599000	-	HMDB0302754	C00956	ko01100//Metabolic pathways;ko01110//Biosynthesis of secondary metabolites;ko01230//Biosynthesis of amino acids;ko01210//2-Oxocarboxylic acid metabolism;ko00310//Lysine degradation;ko00300//Lysine biosynthesis	Amino acid metabolism;Global and overview maps	Metabolism
Com_782_pos	2-alpha-Linolenoyl-glycerol	Glycerolipids	POS	352.261	C21H36O4	11.17	2033000	2687000	2248000	4023000	2761000	4607000	1796000	1943000	1749000	5540000	2796000	9376000	8844000	4340000	18510000	1954000	2036000	1713000	4999000	7545000	4950000	3769000	8823000	4923000	5681000	7397000	15580000	4517000	6513000	8445000	4782000	4951000	5104000	5168000	-	HMDB0011540	-	-	-	-
Com_783_pos	Turanose	Carbohydrates And Its Derivatives	POS	364.078	C12H21O11Na	0.95	21050000	30970000	23820000	51830000	46140000	55860000	31890000	42470000	33960000	27890000	21670000	31510000	42850000	35910000	36660000	15200000	13230000	12040000	57270000	50580000	40450000	47400000	51860000	35630000	37720000	36110000	43080000	37230000	47230000	55320000	42700000	42670000	35260000	43340000	547-25-1	HMDB0011740	-	-	-	-
Com_784_pos	Acetylcholine	Cholines	POS	146.118	C7H16NO2	1.02	129000	252500	202800	539200	506200	501600	294400	310800	349100	322200	217500	340100	1036000	684000	567500	234800	238600	160600	429800	530700	658300	623200	1085000	585600	316400	262800	365300	800400	1405000	1702000	529800	526900	501700	544600	51-84-3	HMDB0000895	C01996	ko00564//Glycerophospholipid metabolism	Lipid metabolism	Metabolism
Com_785_pos	L-Leucyl-L-phenylalanine	Amino Acid And Derivatives	POS	278.163	C15H22N2O3	6.25	75250	135900	102500	137900	154500	206200	263000	248500	271400	292000	229600	414200	522600	213500	313700	216000	273600	213200	183500	230200	229600	372300	1200000	444300	369400	456800	789100	290000	293400	487800	263600	271000	319000	308500	3063-05-06	HMDB0013243	-	-	-	-
Com_786_pos	Beta 2-Solanine	Alkaloids and derivatives	POS	721.44	C39H63NO11	13.8	206400	159600	270900	335600	190800	263500	101500	198700	151900	179100	108100	270500	275800	127300	156200	210600	112200	139600	189000	384400	265000	265500	361700	214100	121600	196800	259800	776600	766800	1090000	219500	215700	195500	157300	--	--	-	-	-	-
Com_787_pos	2-Aminoisobutyric acid	Amino Acid And Derivatives	POS	103.063	C4H9NO2	0.82	32320000	40870000	32970000	42030000	40900000	44990000	40290000	38080000	38660000	39450000	33420000	47850000	55150000	43670000	40570000	36010000	36090000	31300000	41100000	42370000	43580000	42610000	61980000	48410000	45700000	48860000	51010000	43730000	47810000	48840000	42970000	42140000	37890000	41120000	62-57-7	HMDB0001906	-	-	-	-
Com_788_pos	N-(2-Hydroxyethyl)iminodiacetic acid	Organic Acid And Its Derivatives	POS	177.155	C6H11NO5	1.02	149300	185100	144400	353000	279700	385000	282200	330200	208800	255000	195100	326800	694500	351600	416000	148500	110000	107100	147100	159500	199800	122500	380800	199300	281400	326400	317300	303200	323400	389900	199800	262900	295700	249400	--	--	-	-	-	-
Com_789_pos	Methional	Carbonyl compounds	POS	104.171	C4H8OS	0.84	2146000	2424000	1900000	2505000	2155000	2624000	2843000	2711000	2682000	2580000	2355000	3406000	3458000	2845000	3240000	2236000	2152000	2164000	2896000	2770000	2835000	2751000	4727000	3527000	3047000	3392000	3263000	2696000	3260000	3498000	2738000	2763000	2711000	2397000	3268-49-3	HMDB0031857	-	-	-	-
Com_790_pos	Maltotriitol	Sugar Alcohols	POS	506.453	C18H34O16	1.07	253900	471200	316300	781900	670700	1239000	778100	925200	586100	462600	297200	717300	929400	1447000	636300	145000	115500	86460	854600	829500	554100	1280000	1616000	974300	235400	284400	481000	480000	979900	781400	845500	623500	717400	222600	--	--	-	-	-	-
Com_791_pos	Lycoperodine	Indoles and derivatives	POS	216.236	C12H12N2O2	5.47	6683	9960	14507	15340	7138	9480	10630	12050	10290	34580	22780	57690	136300	84070	103000	17770	7278	2755	7075	9512	5575	12070	31430	16980	42800	64260	100600	153100	150500	205600	49540	40590	32450	30540	--	--	-	-	-	-
Com_792_pos	L-Valine	Amino Acid And Derivatives	POS	117.146	C5H11NO2	1.2	534800	700300	500700	940900	997700	1153000	2090000	1761000	1611000	2454000	2069000	3891000	6155000	3623000	3989000	333300	395700	331500	807000	844000	862800	2278000	5097000	2722000	4124000	5907000	7228000	4753000	5061000	5845000	2520000	2442000	2339000	2092000	72-18-4	HMDB0000883	C00183	ko01100//Metabolic pathways;ko01110//Biosynthesis of secondary metabolites;ko01230//Biosynthesis of amino acids;ko02010//ABC transporters;ko00970//Aminoacyl-tRNA biosynthesis;ko01210//2-Oxocarboxylic acid metabolism;ko00770//Pantothenate and CoA biosynthesis;ko00460//Cyanoamino acid metabolism;ko00966//Glucosinolate biosynthesis;ko00280//Valine, leucine and isoleucine degradation;ko00290//Valine,…	Amino acid metabolism;Biosynthesis of other secondary metabolites;Global and overview maps;Membrane transport;Metabolism of cofactors and vitamins;Metabolism of other amino acids;Translation	Environmental Information Processing;Genetic Information Processing;Metabolism
Com_793_pos	2,6-Diaminooimelic Acid	Organic Acid And Its Derivatives	POS	190.197	C7H14N2O4	0.94	72270	76870	58630	86690	51960	59790	67080	81600	65830	92490	78870	125300	275900	81010	133100	46020	40510	72390	44540	49270	68990	41380	89900	45090	56470	77500	78040	78320	75180	87150	80130	67920	69490	65250	--	--	-	-	-	-
Com_794_pos	iP9G	Phytohormones	POS	365.384	C16H23N5O5	1	502500	721200	435600	856300	989300	884100	547200	859300	520700	508300	567400	861000	1045000	608400	740800	259700	259400	332200	1503000	862000	791100	784300	1136000	999200	494500	850800	851000	893100	1095000	674500	566000	720000	606800	621000	--	--	-	-	-	-
Com_795_pos	Spermine	Polyamine	POS	202.34	C10H26N4	0.71	49160	90980	48720	91710	68100	72050	86930	79090	66460	52120	44970	110100	791700	78140	45890	90130	107700	76900	86180	89720	82680	104200	1691000	336200	50980	105900	227000	93330	105100	144200	64940	67820	44660	50940	71-44-3	HMDB0001256	C00750	ko01100//Metabolic pathways;ko00330//Arginine and proline metabolism;ko00480//Glutathione metabolism;ko00410//beta-Alanine metabolism;ko00770//Pantothenate and CoA biosynthesis	Amino acid metabolism;Global and overview maps;Metabolism of cofactors and vitamins;Metabolism of other amino acids	Metabolism
Com_796_pos	Phenylacetylglutamine	Amino Acid And Derivatives	POS	264.277	C13H16N2O4	0.94	13080	16750	18490	20870	23850	15410	9114	15100	12440	18710	24810	36370	82100	22420	84350	27300	10630	24740	30070	21980	16370	38150	41930	20010	36670	39800	55510	43720	39260	48450	21970	17450	25510	32040	-	HMDB0062645	C04148	ko00360//Phenylalanine metabolism	Amino acid metabolism	Metabolism
Com_797_pos	p-Aminobenzoate	Benzoic acids and derivatives	POS	137.136	C7H7NO2	4.45	334800	404200	325900	310700	253600	391600	329400	291900	343200	400600	309700	677700	516800	289800	299400	283600	272400	265800	299700	379200	327900	262800	900800	374600	357100	388200	579200	256300	284100	405300	303700	342600	339200	302600	-	HMDB0304171	C00568	ko01100//Metabolic pathways;ko01120//Microbial metabolism in diverse environments;ko00790//Folate biosynthesis	Global and overview maps;Metabolism of cofactors and vitamins	Metabolism
Com_798_pos	Dihydroactindiolide	Lactones	POS	180.243	C11H16O2	5.51	1577000	1744000	1550000	1038000	1179000	1622000	1567000	1566000	1437000	1149000	842200	1646000	1124000	558500	500200	1388000	1390000	949300	659700	728300	489300	728500	1406000	798200	589300	833700	1285000	363000	406900	572800	1303000	1153000	877500	680500	--	--	-	-	-	-
Com_799_pos	Octadecadien-6-ynoic acid	Fatty Acyls	POS	276.2	C18H28O2	12.1	1158000	1990000	1278000	1356000	1150000	1452000	793600	974600	945100	848500	817700	2353000	1957000	853400	1467000	1059000	1144000	978200	2557000	3272000	2665000	1865000	5691000	1860000	1861000	1574000	1838000	926600	907200	1446000	1335000	1377000	1297000	1396000	--	--	-	-	-	-
Com_800_pos	Phellodensin F	Flavanones	POS	502.2	C26H30O10	7.01	14060	7864	12260	11440	51700	18120	22000	8750	6539	16470	4030	16200	21572	19560	6708	7194	8217	9915	14420	11750	9089	15610	46650	12360	6937	9891	26190	11530	19770	32380	22850	12320	15470	8287	--	--	-	-	-	-
Com_801_pos	iP7G	Phytohormones	POS	365.2	C16H23N5O5	1	2759000	2236000	1946000	3801000	2755000	3430000	3041000	2398000	2460000	2054000	1636000	2250000	3859000	4268000	2445000	1110000	1017000	1137000	3979000	4627000	5254000	2745000	4079000	2940000	2274000	3909000	3183000	3677000	4068000	4890000	3003000	2283000	2439000	2736000	--	--	-	-	-	-
Com_802_pos	Lysine butyrate	Amino Acid And Derivatives	POS	234.1	C10H22N2O4	0.89	56220000	55830000	48790000	72300000	63720000	75330000	70070000	69200000	64170000	77590000	63920000	103700000	117400000	77460000	95700000	60720000	61170000	61090000	69980000	71400000	66960000	77630000	122000000	81700000	78960000	84200000	103700000	72200000	79560000	98700000	68140000	77720000	64620000	77790000	--	--	-	-	-	-
Com_803_pos	Feruloylputrescine	Cinnamic acids and derivatives	POS	264.1	C14H20N2O3	5.04	220700	249400	179200	741100	582500	827300	512200	406800	255900	219600	145000	739600	499500	219500	521900	106100	172700	118000	318100	453400	358200	378400	1719000	563500	257900	335100	413200	240500	259200	340100	379900	327500	307600	299800	501-13-3	HMDB0033463	C10497	ko01100//Metabolic pathways;ko00330//Arginine and proline metabolism	Amino acid metabolism;Global and overview maps	Metabolism
Com_804_pos	N'-Feruloyl putrescine	Phenolamides	POS	264.1	C14H20N2O3	5.1	63440	87620	53270	258900	191000	277900	165200	107100	91860	67590	43540	253300	146300	75630	192000	53870	51550	42190	98130	144500	135400	136300	609100	171200	71780	113200	155800	79280	80610	120500	103500	116800	101900	123800	--	--	-	-	-	-
Com_805_pos	trans-zeatin 9-O-glucoside	Phytohormones	POS	381.1	C16H23N5O6	4.49	3440	12230	15684	17770	9220	15650	18780	24360	24170	13760	9755	41960	39490	18350	15420	15170	7681	10490	15700	25900	26510	29760	99220	34250	30270	47680	75540	19190	31880	25260	24170	28870	10850	16240	--	--	-	-	-	-
Com_806_pos	pteroside A	Carbohydrates And Its Derivatives	POS	410.464	C21H30O8	5.73	80320	130700	65440	81380	55130	98520	60330	62540	54620	72550	45970	136800	133000	66020	58140	41140	51530	42560	80470	78450	47850	48530	210400	46220	115800	71190	150400	27360	25630	72380	67070	67350	67930	47010	35910-15-7	HMDB0030758	-	-	-	-
Com_807_pos	Uridine	Nucleotide And Its Derivates	POS	244.2	C9H12N2O6	1.86	3133000	3932000	2328000	3341000	2849000	3433000	4447000	3031000	4076000	2258000	3107000	4380000	4722000	2247000	3459000	2429000	3158000	2456000	2765000	2960000	3418000	2902000	7854000	4193000	2886000	3584000	3881000	2706000	3136000	4018000	2825000	3109000	2751000	3539000	58-96-8	HMDB0000296	C00299	ko01100//Metabolic pathways;ko02010//ABC transporters;ko00240//Pyrimidine metabolism	Global and overview maps;Membrane transport;Nucleotide metabolism	Environmental Information Processing;Metabolism
Com_808_pos	Cytidine	Nucleotide And Its Derivates	POS	243.22	C9H13N3O5	1.029	2675000	5421000	4111000	5318000	3895000	4984000	4292000	4365000	6417000	7934000	4443000	9898000	10120000	5142000	6683000	5259000	4661000	4280000	6144000	5900000	6097000	7193000	16260000	5853000	6526000	7126000	10590000	8109000	7335000	9095000	7412000	6792000	5932000	5643000	65-46-3	HMDB0000089	C00475	ko01100//Metabolic pathways;ko02010//ABC transporters;ko00240//Pyrimidine metabolism	Global and overview maps;Membrane transport;Nucleotide metabolism	Environmental Information Processing;Metabolism
Com_809_pos	Alanine	Amino Acid And Derivatives	POS	89.094	C3H7NO2	0.86	3025000	2992000	2687000	1449000	1346000	1327000	1465000	1766000	1419000	1494000	1473000	2072000	2344000	1439000	1887000	2432000	2575000	2298000	1426000	1465000	1374000	1824000	2973000	2089000	2005000	2687000	2958000	2315000	2468000	2954000	2285000	2238000	1927000	1768000	302-72-7	HMDB0062251	C01401	ko01100//Metabolic pathways;ko00460//Cyanoamino acid metabolism	Global and overview maps;Metabolism of other amino acids	Metabolism
Com_810_pos	S-(-)-Cotinine	Pyridines and derivatives	POS	176.215	C10H12N2O	1.89	10530	19670	6958	9231	6618	10100	9723	9176	8052	7592	6428	6108	12940	6557	16320	7799	5392	7814	8739	8310	6617	11430	22290	11350	4820	10930	11680	7809	9102	10010	8172	11220	9895	10440	486-56-6	HMDB0001046	-	-	-	-
Com_811_pos	Glycyl-L-valine	Amino Acid And Derivatives	POS	174.2	C7H14N2O3	2.077	20160	37750	41120	25000	23500	63940	95560	67480	77180	70370	32240	128600	198600	102400	112800	88140	61290	84370	68660	93750	77230	112500	375700	134600	118500	137500	239900	124400	142100	180700	138700	90500	104700	64860	1963-21-9	HMDB0028854	-	-	-	-
Com_812_pos	Nepsilon-Acetyl-L-lysine	Amino Acid And Derivatives	POS	188.22	C8H16N2O3	1.304	22474	10430	9757	33972	15090	25660	50100	74030	51640	32160	27532	69020	83420	21100	38080	18537	13990	19670	27920	28880	21540	120700	201600	65660	34490	35300	67280	22810	40720	49830	35180	35670	45490	34450	692-04-6	HMDB0000206	C02727	ko01100//Metabolic pathways;ko00310//Lysine degradation	Amino acid metabolism;Global and overview maps	Metabolism
Com_813_pos	N-Methylsarcosine	Amino Acid And Derivatives	POS	103.12	C4H9NO2	0.9	19090000	23730000	20330000	24110000	23090000	27740000	24020000	24990000	22140000	21870000	21620000	30900000	30550000	25710000	25620000	21710000	22220000	18960000	24750000	25450000	26190000	24660000	38850000	30680000	27610000	30070000	33170000	27540000	29050000	29480000	26710000	24660000	22860000	22260000	1118-68-9	HMDB0000092	C01026	ko01100//Metabolic pathways;ko00260//Glycine, serine and threonine metabolism	Amino acid metabolism;Global and overview maps	Metabolism
Com_814_pos	3-Amino-2-methylpropanoic acid	Amino Acid And Derivatives	POS	103.12	C4H9NO2	0.931	4895000	5533000	4541000	7221000	6744000	8201000	7979000	9718000	8695000	6621000	5436000	9051000	8387000	6483000	6436000	7157000	7242000	6229000	8105000	8714000	8783000	11170000	15390000	10610000	10080000	11110000	11810000	6270000	6723000	7474000	8784000	8073000	7306000	6359000	144-90-1	HMDB0003911	-	-	-	-
Com_815_pos	H-Gly-Pro-OH	Amino Acid And Derivatives	POS	172.18	C7H12N2O3	1.035	144200	222800	220200	450700	311000	613300	421600	632200	683500	475100	310900	918300	1245000	874100	1036000	286800	266600	186700	431400	611500	458700	1169000	2294000	804100	1066000	1234000	1795000	1061000	1331000	1507000	774500	818700	794700	755700	--	--	-	-	-	-
Com_816_pos	L-Homocitrulline	Amino Acid And Derivatives	POS	189.21	C7H15N3O3	0.972	15550	16520	31470	30130	33300	39680	37910	33400	60910	22240	39780	96870	65840	36540	41440	16840	14140	20190	40930	48240	28710	42430	99660	76160	13860	22900	20990	22150	28040	14830	44800	33770	31080	35500	1190-49-4	HMDB0000679	-	-	-	-
Com_817_pos	L-Glutamic acid	Amino Acid And Derivatives	POS	147.13	C5H9NO4	0.886	60330000	63860000	55370000	46290000	35710000	57810000	52750000	43470000	45360000	37970000	34130000	45740000	40310000	28350000	33010000	22210000	23810000	23620000	39690000	47110000	46610000	50700000	59530000	51640000	22880000	25430000	27100000	24010000	29420000	39240000	42100000	39450000	37130000	36320000	-	HMDB0060475	C00025	ko01100//Metabolic pathways;ko01110//Biosynthesis of secondary metabolites;ko01120//Microbial metabolism in diverse environments;ko01230//Biosynthesis of amino acids;ko02010//ABC transporters;ko01200//Carbon metabolism;ko00330//Arginine and proline metabolism;ko00970//Aminoacyl-tRNA biosynthesis;ko01210//2-Oxocarboxylic acid metabolism;ko00630//Glyoxylate and dicarboxylate metabolism;ko00480//Glu…	Amino acid metabolism;Biosynthesis of other secondary metabolites;Carbohydrate metabolism;Energy metabolism;Global and overview maps;Membrane transport;Metabolism of cofactors and vitamins;Metabolism of other amino acids;Translation	Environmental Information Processing;Genetic Information Processing;Metabolism
Com_818_pos	H-Abu-OH	Amino Acid And Derivatives	POS	103.12	C4H9NO2	0.947	3856000	4253000	3828000	4102000	3857000	4713000	4470000	4822000	4866000	5307000	4478000	6680000	6911000	5114000	5698000	4054000	4461000	3684000	4404000	4502000	4699000	5263000	7748000	5610000	5891000	6273000	6821000	5544000	6189000	6350000	5611000	4603000	4691000	4514000	--	--	-	-	-	-
Com_819_pos	7-O-Ethylmorroniside	Iridoid derivatives	POS	434.435	C19H30O11	5.87	27510	56770	27530	61540	30910	90850	33200	31850	52660	12420	34520	121600	82350	37010	62650	78410	75920	70710	55530	61940	63040	75290	156600	65210	113600	83410	209500	59580	69050	114600	95830	52970	48760	81610	--	--	-	-	-	-
Com_820_pos	Gallacetophenone	Ketones	POS	168.042	C8H8O4	4.69	18560	20990	20580	36030	34200	39040	24320	30680	30610	43810	31530	76110	91280	38040	65300	10070	15750	19080	19540	19790	18730	15760	50880	28800	22990	28070	43210	30030	42540	51520	38600	28300	26040	23200	--	--	-	-	-	-
Com_821_pos	N6-(2-Hydroxyethyl)adenosine	Nucleotide And Its Derivates	POS	311.123	C12H17N5O5	4.7	8315	18500	13160	36690	40720	59940	62070	66320	65660	27630	19870	49720	58250	27990	33490	7146	14670	9054	49960	58530	54720	68670	210500	73210	33900	33200	72540	42630	47780	75540	42300	41720	43700	36510	--	--	-	-	-	-
Com_822_pos	Demissidine	Alkaloids and derivatives	POS	399.35	C27H45NO	11.06	258300	644100	1493000	371900	832500	917300	870400	2026000	192400	679600	1474000	576000	433600	1083000	1974000	407000	196300	396200	766500	291100	446200	309400	519000	1316000	590900	1259000	511500	264100	425000	1015000	694400	430100	540800	584100	-	HMDB0303382	C17735	ko00905//Brassinosteroid biosynthesis	Metabolism of terpenoids and polyketides	Metabolism
Com_823_pos	N-Methyl-Trans-4-Hydroxy-L-Proline	Amino Acid And Derivatives	POS	145.074	C6H11NO3	0.91	49570	51570	46440	39590	65420	69790	33720	52720	35250	48980	41220	48550	116300	82300	75270	29330	56620	37430	22580	42920	43860	32730	92900	62190	49330	22430	48410	51160	48460	34940	45850	38340	57450	29660	--	--	-	-	-	-
Com_824_pos	2,6-Dimethoxybenzoquinone	Quinones	POS	168.042	C8H8O4	4.69	23410	38490	23350	59730	54610	70860	44160	52140	37840	49550	39090	119300	145700	64500	70260	17120	17130	20370	26600	32100	21140	21160	82320	35320	30950	41500	59770	43890	59320	80330	52900	43950	36660	33500	530-55-2	HMDB0029673	-	-	-	-
Com_825_pos	Erucamide	Fatty Acyls	POS	337.583	C22H43NO	15.77	516900	486500	518800	454700	487300	475000	475100	530800	581800	529800	490400	467000	568000	518500	512100	542700	537700	489300	484900	554800	547200	518900	535500	523900	552200	532900	545800	503200	588300	530000	475300	527900	549900	490500	-	HMDB0244507	-	-	-	-
Com_826_pos	Hesperetin 5-O-glucoside	Flavanones	POS	464.419	C22H24O11	6.59	534300	480500	473800	552500	268600	554600	226200	458900	278600	332700	362100	755000	290500	156900	162500	325455	358300	300055	223487	263124	35010	273377	727411	296994	267220	295497	460622	170542	198155	282166	252600	227600	149300	168400	69651-80-5	HMDB0037535	-	-	-	-
Com_827_pos	Hypoxanthine-9-beta-D-Arabinofuranoside	Nucleotide And Its Derivates	POS	268.226	C10H12N4O5	2.58	138600	212400	71740	192200	153300	236800	155700	172300	112100	160500	111000	328000	505000	238200	235571	136800	131500	96180	225400	274200	186100	172600	664900	289400	217100	231800	408100	207600	286700	365000	207400	150200	139800	141400	--	--	-	-	-	-
Com_828_pos	Indole-3-acetamide	Indoles and derivatives	POS	174.199	C10H10N2O	0.82	718500	701200	605400	946800	731400	636300	520800	629100	465000	781500	711600	1357000	1068000	605700	634200	1256000	1190000	1225000	362900	541500	463600	325000	768500	282100	886900	800600	1113000	590100	628400	904700	763400	586300	608800	648600	879-37-8	HMDB0029739	C02693	ko01100//Metabolic pathways;ko00380//Tryptophan metabolism	Amino acid metabolism;Global and overview maps	Metabolism
Com_829_pos	Indole-3-Carboxaldehyde	Indoles and derivatives	POS	145.158	C9H7NO	7.33	24760	23060	16226	31780	39400	25506	18770	9864	15450	34870	19060	25780	153300	82960	87340	10920	20450	15639	23870	8970	24539	17130	44560	33150	71980	53000	73780	146700	135500	160300	49450	47790	40280	35150	487-89-8	HMDB0029737	-	-	-	-
Com_830_pos	dUDP	Nucleotide And Its Derivates	POS	388.162	C9H14N2O11P2	7.17	28190	35400	24610	64320	75470	69660	48170	50230	46960	52880	36620	104500	154200	74900	67020	11150	8987	16630	21890	33250	17390	26130	76100	31140	46980	76030	93920	37740	42310	55480	37900	46950	35780	37070	4208-67-7	HMDB0001000	C01346	ko01100//Metabolic pathways;ko00240//Pyrimidine metabolism	Global and overview maps;Nucleotide metabolism	Metabolism
Com_831_pos	Salicylamide	Phenolamides	POS	137.048	C7H7NO2	0.92	402500	403600	327700	287600	275100	353600	320300	253900	258200	320900	248700	442200	395500	392700	310800	227000	177000	196700	157600	209200	239600	243500	348200	256700	199800	254500	274200	418200	372000	417400	289900	230400	235300	252700	65-45-2	HMDB0015687	-	-	-	-
Com_832_pos	Luteolin-4'-O-glucoside	Flavonoids	POS	448.101	C21H20O11	6.8	2491000	3184000	1932000	1541000	1229000	1481000	800300	923500	896700	991500	885300	2374000	1843000	682500	426400	1967000	1751000	1449000	3172000	5919000	4039000	1555000	5183000	4465000	1952000	1522000	3746000	2004000	4109000	8297000	1303000	1827000	1662000	1111000	--	--	-	-	-	-
Com_833_pos	2-Methylcinnamic acid	Cinnamic acids and derivatives	POS	162.185	C10H10O2	5.53	3428000	3480000	3378000	1850000	1464000	3131000	2237000	2445000	2280000	2852000	2367000	5257000	4027000	1842000	2079000	2070000	2278000	2011000	1460000	1916000	1399000	1774000	4231000	2072000	1846000	1879000	2822000	1111000	1082000	1590000	1666000	1749000	2083000	1999000	--	--	-	-	-	-
Com_834_pos	Geranylacetone	Terpenoids	POS	194.313	C13H22O	5.34	189000	213300	94650	182600	140700	150000	297700	192800	228700	133200	133200	442200	544800	160800	235800	385800	423500	382400	261400	314700	338800	306600	1068000	475900	429300	561000	827300	271700	414300	593100	343900	302000	133100	123600	3796-70-1	HMDB0031846	-	-	-	-
Com_835_pos	Geranylgeraniol	Terpenoids	POS	290.483	C20H34O	5.47	27302	45777	28077	23000	23690	37874	34619	22350	26550	18540	33024	49307	37940	72520	156800	30131	26773	19630	49640	67590	47730	51050	71320	53530	34930	53950	75330	82990	90220	108400	34210	35100	12400	36890	--	--	C09094	ko01110//Biosynthesis of secondary metabolites;ko00904//Diterpenoid biosynthesis	Global and overview maps;Metabolism of terpenoids and polyketides	Metabolism
Com_836_pos	alpha-Ionone	Terpenoids	POS	192.297	C13H20O	1.86	187000	275900	209600	893700	896100	1198000	1677000	1764000	1615000	1948000	1568000	3545000	4533000	2537000	2793000	266400	307400	260900	897100	1014000	915200	2373000	6269000	2696000	4010000	4427000	6325000	2959000	3477000	4438000	1930000	1901000	1820000	1769000	-	HMDB0059883	-	-	-	-
Com_837_pos	Solanidine	Steroids and steroid derivatives	POS	397.636	C27H43NO	0.96	2786000	5342000	2541000	3242000	2684000	4020000	2869000	3027000	3685000	2733000	2089000	3245000	2596000	1566000	11720000	2671000	2235000	1995000	2562000	2560000	2904000	3218000	4771000	4704000	1681000	2112000	2295000	1375000	2024000	2412000	2533000	3021000	2640000	2570000	80-78-4	HMDB0003236	-	-	-	-
Com_838_pos	Phenylethanolamine	Amines	POS	137.084	C8H11NO	2	881100	1446000	997500	797600	798300	1290000	1223000	1216000	1202000	1584000	1224000	2602000	3520000	1711000	2185000	5460000	5749000	4343000	18410000	19700000	18270000	17380000	51310000	19490000	15830000	19120000	25940000	16710000	19860000	31250000	9798000	9406000	8822000	8196000	-	HMDB0062626	-	-	-	-
Com_839_pos	1-Methylpiperidine-2-carboxylic acid	Amino Acid And Derivatives	POS	143.095	C7H13NO2	0.99	1426000	3244000	2641000	2685000	2687000	4253000	2086000	3125000	3349000	3769000	2732000	5280000	6602000	5201000	3700000	3730000	3284000	2591000	4114000	5936000	4861000	6139000	10380000	4869000	10120000	8486000	9609000	9959000	12620000	15530000	6151000	5962000	5261000	4704000	--	--	-	-	-	-
Com_840_pos	N-Feruloyl-3-methoxytyramine	Phenolamides	POS	343.142	C19H21NO5	5.72	14650	13420	12930	73960	54280	51560	67250	65980	53950	118700	121000	237000	441400	293100	337800	15150	8631	11910	81410	81450	60730	90820	171400	108400	197300	195800	246100	236000	364200	356700	137600	142900	162500	140200	--	--	-	-	-	-
Com_841_pos	N-p-Coumaroylputrescine	Cinnamic acids and derivatives	POS	234.29	C13H18N2O2	4.91	231900	186200	78650	94530	101800	94230	91620	101000	55240	108400	91280	325700	1164000	566700	1149000	100600	130200	116600	163300	205000	236600	568000	1586000	586400	207100	442600	382400	647100	550700	817800	345200	265000	299300	255900	--	--	-	-	-	-
Com_842_pos	N-Feruloylputrescine	Cinnamic acids and derivatives	POS	264.32	C14H20N2O3	5.22	354800	182000	154700	331800	226800	291300	252400	300100	107100	426300	362100	972000	1733000	1042000	1654000	104800	137800	78430	189600	258900	214400	211100	665000	295400	684900	1147000	1345000	579600	635400	887500	467300	438400	411000	370800	501-13-3	HMDB0033463	C10497	ko01100//Metabolic pathways;ko00330//Arginine and proline metabolism	Amino acid metabolism;Global and overview maps	Metabolism
Com_843_pos	MAG (18:3)	Glycerolipids	POS	352.2	C21H36O4	12.12	1014000	1246000	1124000	3302000	2619000	3644000	1110000	1154000	1104000	4927000	1649000	5229000	9299000	3293000	39910000	689300	677000	658300	3383000	4615000	3047000	1489000	5803000	3010000	2554000	3157000	5797000	2125000	3799000	3866000	2681000	2658000	2632000	2514000	--	--	-	-	-	-
Com_844_pos	LysoPC 20:4	Phospholipid	POS	543.4	C28H50NO7P	12.69	2430000	1292000	2682000	2035000	1265000	1496000	727200	696500	499800	715100	655800	1616000	298200	128500	17860	1304000	1269000	1370000	1404000	2493000	1576000	860700	1557000	602400	376000	403900	715700	240900	210600	395200	679600	826900	783700	582300	--	--	-	-	-	-
Com_845_pos	LysoPC 15:0	Phospholipid	POS	481.3	C23H48NO7P	11.94	3227	3169	7808	21350	20320	24610	17870	22170	11700	27890	23180	65590	92870	44680	6129	5127	5953	3966	10910	23890	17540	10440	27790	13810	34550	40590	68660	64570	51070	100600	16580	28920	21270	24540	--	--	-	-	-	-
Com_846_pos	MAG (18:1)	Glycerolipids	POS	356.2	C21H40O4	15.2	9278	4514	15240	13960	11090	7848	4648	3974	1731	13030	5447	15090	5153	3062	30120	8467	9300	6463	6376	8861	8468	2504	5696	5913	1328	4090	8165	3342	2705	7324	6231	4284	4273	5457	--	--	-	-	-	-
Com_847_pos	Octadeca-11E,13E,15Z-trienoic acid	Fatty Acyls	POS	278.2	C18H30O2	13.5	2728000	2168000	1647000	2417000	2179000	2313000	1905000	2194000	2298000	2278000	2222000	2593000	2375000	2004000	2714000	2509000	1851000	2014000	1645000	2229000	1642000	2200000	2330000	2022000	2686000	1892000	2019000	2303000	1835000	2428000	2609000	2151000	1699000	1856000	--	--	-	-	-	-
Com_848_pos	LysoPC 10:0	Phospholipid	POS	411.3	C18H38NO7P	6.25	104100	97070	89790	78520	75190	83080	73540	58210	42150	62860	44190	165200	72020	20000	39270	47200	49600	57200	96680	115900	121200	100200	362800	128500	45770	82640	119300	75910	111200	189600	99000	96360	83400	86330	--	--	-	-	-	-
Com_849_pos	Cocamidopropyl betaine	Alkaloids and derivatives	POS	342.1	C19H38N2O3	9.91	88630	104300	92360	212900	88070	88400	88000	124900	88180	100100	88930	110700	110500	111500	126300	112400	87870	105900	105700	77380	87260	84330	125600	88700	112900	98460	128500	88510	147500	143100	108000	102900	95880	87000	--	--	-	-	-	-
Com_850_pos	Phloretin	Chalcones and dihydrochalcones	POS	274.27	C15H14O5	8.598	223400	329100	246400	236600	189100	237200	174000	189600	201000	202400	184800	458300	332700	154700	233400	205500	225000	168100	249600	308300	288600	225300	706800	257300	261700	234200	355100	106500	140600	214600	225000	202700	205600	231800	60-82-2	HMDB0003306	C00774	ko01110//Biosynthesis of secondary metabolites;ko00941//Flavonoid biosynthesis	Biosynthesis of other secondary metabolites;Global and overview maps	Metabolism
Com_851_pos	Isopentenyl adenosine	Phytohormones	POS	335.358	C15H21N5O4	6.814	18550	30350	18430	10300	16320	6869	13800	14440	17960	46060	30900	52950	48440	36120	19740	27450	18200	20420	22820	17610	20360	26300	68820	27420	57850	49650	85580	27230	37750	66120	47970	29870	29430	23160	-	HMDB0304396	C16427	ko01110//Biosynthesis of secondary metabolites;ko00908//Zeatin biosynthesis	Global and overview maps;Metabolism of terpenoids and polyketides	Metabolism
Com_852_pos	Glabrene	Isoflavonoids	POS	322.361	C20H18O4	10.49	76560	88740	59980	55490	55330	74090	48820	47060	41010	43700	36410	56010	30430	21120	18640	64930	75210	62040	56030	50820	64630	45800	79990	60140	22980	30760	33980	13400	7664	16070	49370	45180	50160	47280	60008-03-9	HMDB0029530	-	-	-	-
Com_853_pos	Hecogenin	Flavonoids	POS	430.628	C27H42O4	6.08	10750000	12870000	10600000	9895000	7000000	9901000	5638000	6257000	7070000	7471000	6531000	14900000	9429000	4215000	4062000	11050000	10340000	8729000	3901000	5547000	4242000	4058000	9853000	4674000	5089000	5666000	11100000	3507000	3397000	4743000	7024000	6009000	6118000	7271000	115921-09-0	HMDB0038824	-	-	-	-
Com_854_pos	Pratensein-7-O-glucoside	Isoflavonoids	POS	462.41	C22H22O11	6.86	305846	459160	307811	433438	92230	515342	547417	513435	545946	457191	333809	893433	1056187	256900	142000	733000	943000	645400	789700	606600	1223000	383800	2446000	740000	1253000	1312000	1526000	1207000	584000	1334000	408300	512900	343200	715800	--	--	-	-	-	-
Com_855_pos	S-(5'-Adenosyl)-L-methionine	Amino Acid And Derivatives	POS	398.137	C15H22N6O5S	0.83	447300	419500	303500	894100	1016000	1443000	1491000	1205000	981200	639200	551800	1556000	1124000	493500	669900	417800	437700	302700	919800	1003000	1075000	1259000	3647000	1521000	649700	793700	1140000	571700	781500	733800	772300	701400	726200	805800	485-80-3	HMDB0001185	C00019	ko01100//Metabolic pathways;ko01110//Biosynthesis of secondary metabolites;ko01230//Biosynthesis of amino acids;ko00330//Arginine and proline metabolism;ko00270//Cysteine and methionine metabolism;ko00908//Zeatin biosynthesis;ko04122//Sulfur relay system;ko00261//Monobactam biosynthesis	Amino acid metabolism;Biosynthesis of other secondary metabolites;Folding, sorting and degradation;Global and overview maps;Metabolism of terpenoids and polyketides	Genetic Information Processing;Metabolism
Com_856_pos	Petunidin 3-O-glucoside	Anthocyanins	POS	479	C22H23O12	0.98	2149000	2081000	2320000	2166000	3427000	2050000	1232000	1947000	1948000	1990000	1040000	2369000	2110000	1636000	1972000	1873000	1352000	1649000	2113000	2081000	2284000	2062000	1030000	1275000	2139000	1604000	1844000	1388000	1583000	874200	2074000	2212000	2744000	2528000	--	--	C12139	ko00942//Anthocyanin biosynthesis	Biosynthesis of other secondary metabolites	Metabolism
Com_857_pos	Icariside B2	Organooxygen compounds	POS	386.194	C19H30O8	6.05	20900	28630	8510	14630	6898	39200	9611	24390	32382	36000	21470	51410	49490	47990	45680	55680	67240	42550	68760	108600	77770	114300	112900	44230	71820	173600	200100	173700	124000	342000	56840	39600	81570	50220	--	--	-	-	-	-
Com_858_pos	Angelol K	Coumarins and derivatives	POS	376.406	C20H24O7	11.12	62260	167400	314000	93930	214200	222200	194700	420100	44270	147900	328700	123400	101400	210800	447100	80990	48890	82410	135400	64100	90080	85380	115600	302500	107500	233000	105000	68890	91270	232600	140300	131100	116100	127200	--	--	-	-	-	-
Com_859_pos	Angelol A	Coumarins and derivatives	POS	376.406	C20H24O7	11.11	21870	32000	83540	24780	58110	70850	43820	127800	13390	56960	95980	37460	27620	49890	112500	18790	11640	22420	35340	17100	32530	15220	27760	65340	20250	68070	28870	14780	19960	73290	37420	32600	31240	26840	--	--	-	-	-	-
Com_860_pos	Paeonol	Ketones	POS	166.177	C9H10O3	4.08	68430	128800	90870	462200	520400	673700	1124000	1254000	1074000	1606000	1135000	2413000	4290000	2521000	2946000	105400	122300	84780	493700	583800	510200	1636000	3608000	1881000	3257000	3836000	5370000	2983000	3385000	4265000	1755000	1632000	1442000	1399000	-	HMDB0256081	-	-	-	-
Com_861_pos	Neodiosmin	Flavones and Flavonols	POS	608.545	C28H32O15	7.12	210400	300900	214000	286300	309900	393200	197200	123300	179000	228300	162400	563500	817300	627600	497600	1951000	2264000	1674000	2794000	3704000	2664000	1949000	5889000	2522000	3555000	3648000	6666000	2914000	3083000	4594000	1602000	1548000	1562000	1602000	-	HMDB0039857	-	-	-	-
Com_862_pos	Tricin	Flavones and Flavonols	POS	330.289	C17H14O7	7.5	455500	484500	451300	204900	329300	369900	213000	388700	271800	533600	596300	1077000	928100	411300	498300	204097	188957	166571	116296	106900	150003	161931	248000	143200	182987	87020	265371	198970	194983	305902	245300	253200	240000	234400	--	--	-	-	-	-
Com_863_pos	trans-3-Hydroxy-L-proline	Amino Acid And Derivatives	POS	131.13	C5H9NO3	2.14	1578000	2315000	1684000	6057000	5900000	7870000	11480000	11960000	10580000	13620000	10980000	22830000	32450000	18560000	22350000	1382000	1588000	1318000	4916000	5951000	4979000	14640000	31030000	16330000	20970000	24830000	31920000	21020000	25740000	31480000	14790000	13440000	12000000	11540000	-	HMDB0059659	C05147	ko01100//Metabolic pathways;ko00330//Arginine and proline metabolism	Amino acid metabolism;Global and overview maps	Metabolism
Com_864_pos	Val-Ser	Amino Acid And Derivatives	POS	204.224	C8H16N2O4	1.01	104700	231800	93390	195800	183200	260300	181100	248000	212600	249400	223700	326500	346900	178900	188300	176600	172600	196700	298500	218400	327700	266900	608200	370700	277200	209700	374800	249600	356900	325200	256800	227300	180600	150800	13588-94-8	HMDB0029136	-	-	-	-
Com_865_pos	4-Acetamidobutyric Acid	Amino Acid And Derivatives	POS	145.156	C6H11NO3	1.03	125200	174000	124900	434600	325100	320900	287400	373400	324700	198000	177100	214700	757400	434400	355200	134500	174100	175600	458500	297700	573100	475000	941300	625000	224200	193000	205600	578100	416100	716200	364900	374100	361600	321200	3025-96-5	HMDB0003681	C02946	ko01100//Metabolic pathways;ko00330//Arginine and proline metabolism	Amino acid metabolism;Global and overview maps	Metabolism
Com_866_pos	Gentiobiose	Carbohydrates And Its Derivatives	POS	342.297	C12H22O11	1	71180	99560	87390	98600	90140	107200	138800	124800	90260	104700	71170	99040	98810	76890	92730	86150	50310	69230	93230	108500	85080	142800	202300	151500	98430	94310	62020	80450	83860	101200	121400	57580	97800	87510	--	--	-	-	-	-
Com_867_pos	alpha-Nicotinamide adenine dinucleotide	Nucleotide And Its Derivates	POS	663.425	C21H27N7O14P2	1.04	19180	27140	49960	42150	54440	77860	57700	86920	25590	62680	39470	132800	356900	124300	131900	15980	14360	22860	33380	50630	34980	71850	195600	85380	65000	137500	301400	188200	180800	226900	57130	81140	56980	77750	--	--	-	-	-	-
Com_868_pos	trans-3,5-Dimethoxy-4-hydroxycinnamaldehyde	Phenols And Its Derivatives	POS	208.211	C11H12O4	6.49	17512	26637	20484	31422	34330	41901	28280	92170	37150	76480	36420	44560	124500	25530	68550	22429	24497	36930	50160	49910	49230	94630	161800	56860	61700	66252	136100	62600	66830	163900	39500	35990	30620	27130	--	--	-	-	-	-
Com_869_pos	N-Methylnicotinamide	Pyridines and derivatives	POS	136.151	C7H8N2O	1.84	8428	6310	9487	14610	15390	31320	33380	21790	34870	41350	35480	58630	74760	46110	55830	8633	13170	13550	24000	32380	10960	66350	142900	59740	73410	85030	123700	63390	58570	98910	44170	30870	33060	33220	114-33-0	HMDB0003152	-	-	-	-
Com_870_pos	(-)-3-(3,4-Dihydroxyphenyl)-2-methylalanine	Amino Acid And Derivatives	POS	211.214	C10H13NO4	4.61	7827	5002	5947	2254	1277	4293	3386	10460	13760	6912	6563	9588	19030	8431	5490	5941	7692	8720	12550	11320	14800	12620	31500	16540	11920	16940	20500	17740	8885	7457	11680	5831	10470	9619	--	--	-	-	-	-
Com_871_pos	Fangchinoline	Lignans	POS	608.72	C37H40N2O6	6.424	176900	254700	156800	80150	138400	168800	93830	120100	125200	91150	101300	314100	288300	86130	124700	226500	255500	309100	142800	187700	143900	149300	393300	147900	133300	178600	339100	143400	122800	199600	153000	154700	100600	130800	-	HMDB0242612	-	-	-	-
Com_872_pos	(+)-Fangchinoline	Lignans	POS	608.72	C37H40N2O6	6.422	412100	585300	275100	261600	288800	406000	200000	287200	283300	248500	225100	350200	546700	195800	189700	560900	735500	469000	280900	434000	323900	352800	815000	366700	387600	598500	906300	308600	309400	457200	337100	307100	299800	306400	--	--	-	-	-	-
Com_873_pos	Glucosamine	Carbohydrates And Its Derivatives	POS	179.173	C6H13NO5	0.793	48650	25130	23480	43120	39690	38840	93280	29820	45370	50030	56160	47560	48170	69580	46910	54090	37870	30270	40650	60500	17910	49650	46070	57330	40670	27790	54850	97900	36180	64260	46240	43600	44700	23270	14257-69-3	HMDB0030091	-	-	-	-
Com_874_pos	Stachydrine	Amino Acid And Derivatives	POS	143.18	C7H13NO2	1.008	99510	112500	117800	536300	587800	663800	248800	253600	239100	112400	39550	181000	1694000	1004000	201700	91160	99590	53660	126000	162800	171700	196700	252900	190100	136200	116400	175800	195200	368600	444000	296900	214100	300800	261500	471-87-4	HMDB0004827	-	-	-	-
Com_875_pos	Vanillactic acid	Phenylpropanoids and polyketides	POS	212.199	C10H12O5	9.2	5147	39920	10410	31800	14338	25790	17230	14580	11090	7387	12840	23190	18640	9454	14780	28950	19980	3114	21710	11750	24400	6139	26330	15930	17000	11660	21812	10319	2371	13830	22210	18840	9684	8713	2475-56-1	HMDB0000913	-	-	-	-
Com_876_pos	tZROG	Phytohormones	POS	513.498	C21H31N5O10	5.2	12320	6891	3814	3267	10670	9300	12830	6794	8817	5459	6330	25380	11090	7480	13270	8671	8784	9942	9991	13410	3809	6002	34130	13270	12830	3455	23160	4534	10600	27860	9224	12930	8537	7506	--	--	-	-	-	-
Com_877_pos	Tyramine	Benzene and substituted derivatives	POS	137.179	C8H11NO	2	251000	353300	226800	191600	200600	321900	313100	303200	300000	404400	307600	688000	897200	455000	495400	1400000	1426000	1097000	4583000	5001000	4486000	4372000	13150000	5247000	4011000	5105000	6706000	4326000	5425000	7930000	2592000	2462000	2118000	2049000	51-67-2	HMDB0000306	C00483	ko01100//Metabolic pathways;ko01110//Biosynthesis of secondary metabolites;ko00350//Tyrosine metabolism;ko00950//Isoquinoline alkaloid biosynthesis	Amino acid metabolism;Biosynthesis of other secondary metabolites;Global and overview maps	Metabolism
Com_878_pos	Tuberonic acid hexoside	Carbohydrates And Its Derivatives	POS	388.41	C18H28O9	5.89	34650	34110	26190	70930	40440	54190	50800	54440	34610	30780	26570	56870	73300	33130	25470	23000	34630	21550	42640	68370	50730	30320	85610	45140	57250	48210	75010	10980	23470	22300	26640	39800	41160	23950	--	--	-	-	-	-
Com_879_pos	Tricin O-malonylhexoside	Flavonoids	POS	578.47	C26H26O15	7.5	3862000	5186000	3651000	2791000	2550000	3890000	2637000	3484000	2247000	4161000	3936000	9077000	9698000	3451000	4230000	1702000	1722000	1438000	1323000	1927000	1409000	1538000	4198000	1726000	1801000	2081000	3383000	1297000	1370000	2302000	2699000	2610000	2440000	2226000	--	--	-	-	-	-
Com_880_pos	Kaempferol 3-O-glucoside-2‘-O-rhamnoside	Flavones and Flavonols	POS	594.526	C27H30O15	6.08	15140000	16510000	14170000	9987000	7146000	11480000	6435000	7651000	7886000	6650000	8562000	14760000	10530000	5251000	6579000	21250000	19110000	19280000	5484000	8671000	7803000	4580000	12950000	6601000	8787000	9588000	15450000	5306000	4388000	5884000	9067000	8467000	7128000	7998000	--	--	-	-	-	-
Com_881_pos	C-hexosyl-luteolin O-hexoside	Flavonoids	POS	610.518	C27H30O16	5.68	127800	215800	138300	257500	228300	280300	115000	146500	122300	138200	122000	302900	720300	521100	534000	2737000	3024000	2492000	1534000	1986000	1655000	1385000	4343000	1662000	2127000	2606000	3364000	1154000	1041000	1569000	1115000	1177000	1004000	667600	--	--	-	-	-	-
Com_882_pos	Canthaxanthin	Terpenoids	POS	564.84	C40H52O2	5.81	10500	11450	10440	21900	5437	8631	9670	8776	15110	17800	16800	42800	48310	29880	22440	29280	44180	30860	29130	24210	34920	32850	69500	33090	43740	38990	66870	20350	15470	12010	17170	15520	17800	12690	514-78-3	HMDB0003154	C08583	ko01110//Biosynthesis of secondary metabolites;ko00906//Carotenoid biosynthesis	Global and overview maps;Metabolism of terpenoids and polyketides	Metabolism
Com_883_pos	LysoPC 16:0 (2n isomer)	Phospholipid	POS	495.33	C24H50NO7P	12.55	1204000	831100	2216000	3988000	2929000	4265000	3100000	3699000	2087000	3924000	3533000	7374000	4265000	2264000	247600	1200000	1123000	1372000	1968000	3921000	1968000	2642000	4384000	1844000	3420000	4373000	9258000	3594000	2905000	5557000	1990000	1842000	1747000	1894000	--	--	-	-	-	-
Com_884_pos	LysoPC 14:0 (2n isomer)	Phospholipid	POS	467.3	C22H46NO7P	11.36	9779	12260	9899	16400	11090	13640	11970	18430	7814	14200	18130	41430	74400	32030	12040	20590	11880	9203	9171	18010	13730	12520	59410	22040	25580	34490	51410	44810	39990	53870	17990	19620	15290	16770	--	--	-	-	-	-
Com_885_pos	LysoPC 18:0	Phospholipid	POS	523.36	C26H54NO7P	13.8	36610	14840	107800	131800	90940	154200	148400	149400	71230	154200	137500	260300	13670	19810	1167	35130	33200	50830	55670	140100	56750	92390	35440	21380	88740	140100	268400	24270	98310	46120	22330	24620	23870	17770	--	--	-	-	-	-
Com_886_pos	5-Aminovaleric acid	Amino Acid And Derivatives	POS	117.079	C5H11NO2	18.27	60050	54590	66620	55460	69560	66500	63310	61190	71810	59890	67690	59350	58460	69240	49690	72600	71010	58530	75380	70320	65230	76950	73950	65810	76730	72280	74370	82690	81060	77420	87920	63850	64220	62730	660-88-8	HMDB0003355	C00431	ko01100//Metabolic pathways;ko01120//Microbial metabolism in diverse environments;ko00330//Arginine and proline metabolism;ko00310//Lysine degradation	Amino acid metabolism;Global and overview maps	Metabolism
Com_887_pos	Asp-phe	Amino Acid And Derivatives	POS	280.106	C13H16N2O5	5.12	37650	43020	31170	58670	49360	70950	85160	98380	92340	73260	57420	125300	216200	112500	131600	68860	74370	53190	85510	86170	88620	103100	306300	132500	104700	123500	197600	88730	169000	186900	94810	103300	89060	67170	13433-09-5	HMDB0000706	-	-	-	-
Com_888_pos	6-Aminocaproic acid	Fatty Acyls	POS	131.095	C6H13NO2	2.07	1364000	2048000	1335000	5085000	5099000	6832000	9885000	10770000	9381000	12070000	9443000	20300000	30730000	16660000	20060000	1231000	1335000	1110000	4435000	5131000	4291000	12630000	29070000	14570000	18850000	22610000	30490000	18190000	23160000	28080000	12880000	11670000	10950000	9641000	60-32-2	HMDB0001901	C02378	ko01100//Metabolic pathways;ko01120//Microbial metabolism in diverse environments	Global and overview maps	Metabolism
Com_889_pos	Dihydrojasmone	Carbonyl compounds	POS	166.26	C11H18O	11.468	695600	740000	754200	775000	772900	802100	719200	721600	754700	723200	749200	755000	712000	770800	717700	715200	703200	704300	770000	650400	703600	727500	679400	698700	790800	738100	793300	736800	737100	742900	753100	700000	776600	743600	1128-08-1	HMDB0031565	-	-	-	-
Com_890_pos	2-Phenylethylamine	Amines	POS	121.18	C8H11N	4.584	475000	540000	331000	414400	530300	598900	380400	400500	284500	350200	259100	557400	827300	430200	547900	109500	135200	139500	165100	298100	213300	283500	730200	321300	314900	358900	431700	268100	304400	427800	418400	346400	314200	315700	64-04-0	HMDB0012275	C05332	ko01100//Metabolic pathways;ko00360//Phenylalanine metabolism	Amino acid metabolism;Global and overview maps	Metabolism
Com_891_pos	5-O-Methylvisammioside	Flavonoids	POS	452.45	C22H28O10	7.037	80500	143000	101900	193300	138000	219200	146300	126300	107800	248400	191600	477200	890100	353100	379300	95440	108000	70650	166700	186700	142600	149100	334500	113700	537600	582400	1061000	316800	295300	543500	222500	199900	297600	249600	--	--	-	-	-	-
Com_892_pos	Oxidized glutathione	Amino Acid And Derivatives	POS	630.646	C20H32N6O12S2	1.06	590200	1707000	717500	1485000	1173000	2431000	1557000	2337000	2141000	1482000	1126000	4391000	3680000	1284000	1615000	640100	692700	730800	1484000	1510000	875900	1819000	10050000	2215000	1848000	1913000	4938000	946000	1828000	2448000	1522000	1480000	1181000	1332000	15718-51-1	HMDB0011691	C00127	ko01100//Metabolic pathways;ko00480//Glutathione metabolism	Global and overview maps;Metabolism of other amino acids	Metabolism
Com_893_pos	Glu-Glu	Amino Acid And Derivatives	POS	276.243	C10H14N2O7	0.99	61440	57100	68590	75930	43710	62620	57750	40740	50210	38480	44370	51930	43350	35800	52330	32850	57570	32690	65380	50460	32550	34040	38590	52470	31820	21840	63060	25280	38130	37326	63080	43850	29610	26380	3929-61-1	HMDB0028818	-	-	-	-
Com_894_pos	Hippuric Acid	Organic Acid And Its Derivatives	POS	179.173	C9H9NO3	6.2	9638	9666	6845	4925	9561	7699	15930	11380	4667	13720	7600	11630	21330	4981	17130	13309	10973	9138	4467	5914	8118	3869	31830	7094	3288	6387	18810	10480	7795	11170	3715	6194	6908	5366	495-69-2	HMDB0000714	C01586	ko01100//Metabolic pathways	Global and overview maps	Metabolism
Com_895_pos	GDP-L-fucose	Nucleotide And Its Derivates	POS	589.342	C16H25N5O15P2	4.13	6062	6412	2973	3722	6922	5965	5199	4825	12700	16140	9523	37350	24150	9823	16170	9015	12360	9755	11150	6889	10150	8093	41790	13450	12960	8849	21320	5636	5751	8039	8277	6959	8680	6043	15839-70-0	HMDB0001095	C00325	ko01100//Metabolic pathways;ko00520//Amino sugar and nucleotide sugar metabolism;ko00051//Fructose and mannose metabolism	Carbohydrate metabolism;Global and overview maps	Metabolism
Com_896_pos	Hydroxytomatidine	Alkaloids and derivatives	POS	431.65	C27H45NO3	0.99	11330	9918	14690	17130	19750	6379	14670	17600	24570	18300	9012	14220	11720	15840	20440	24320	8438	12290	10310	14240	16830	15630	13360	20570	13000	8951	11140	16860	5571	21280	9430	7565	13420	19100	--	--	-	-	-	-
Com_897_pos	Neoprzewaquinone A	Organoheterocyclic compounds	POS	556.615	C36H28O6	7.29	12380	22870	16730	8346	14630	22580	4728	4749	7941	13850	15410	23900	19910	7571	6081	30310	35130	27390	15010	20680	10130	16730	48060	11420	4719	11420	24270	7700	4607	7341	5990	7675	7425	10930	--	--	-	-	-	-
Com_898_pos	DL-Glutamine	Amino Acid And Derivatives	POS	146.14	C5H10N2O3	0.84	229400000	224100000	195000000	61920000	60590000	53100000	65550000	68870000	58510000	57570000	47610000	83810000	123100000	93390000	108500000	293700000	302600000	275700000	55750000	66710000	68830000	73070000	125400000	84460000	91710000	106100000	146500000	99220000	107200000	124400000	149600000	146500000	136700000	133300000	--	--	-	-	-	-
Com_899_pos	VitaMin U	Vitamins	POS	199.7	C6H14ClNO2S	0.75	5211000	5526000	3940000	8339000	6244000	8548000	9092000	10400000	9064000	12190000	9508000	21330000	19870000	13100000	13830000	5050000	4584000	5072000	4193000	4482000	4000000	7727000	15880000	8997000	10930000	12120000	17810000	11880000	13280000	17250000	8654000	9208000	9231000	8929000	13065-25-3	HMDB0038670	-	-	-	-
Com_900_pos	L-lysine	Amino Acid And Derivatives	POS	146.19	C6H14N2O2	0.74	322100000	306200000	269000000	95080000	93510000	88730000	101500000	111500000	97780000	93900000	82310000	140400000	194000000	144200000	165600000	401900000	407200000	379400000	83500000	101200000	101200000	111900000	187000000	129400000	142600000	160600000	214800000	154700000	161300000	195300000	213400000	219200000	213100000	197800000	10098-89-2	HMDB0301757	C00047	ko01100//Metabolic pathways;ko01110//Biosynthesis of secondary metabolites;ko01120//Microbial metabolism in diverse environments;ko01230//Biosynthesis of amino acids;ko02010//ABC transporters;ko00970//Aminoacyl-tRNA biosynthesis;ko01210//2-Oxocarboxylic acid metabolism;ko00310//Lysine degradation;ko00960//Tropane, piperidine and pyridine alkaloid biosynthesis;ko00300//Lysine biosynthesis;ko00780/…	Amino acid metabolism;Biosynthesis of other secondary metabolites;Global and overview maps;Membrane transport;Metabolism of cofactors and vitamins;Translation	Environmental Information Processing;Genetic Information Processing;Metabolism
Com_901_pos	Thiamine	Vitamins	POS	265.354	C12H17N4OS+	0.81	231600	251200	230900	217700	256000	231900	150200	174600	178700	204300	183100	360900	272500	161100	128400	249800	255100	206300	163700	263300	178500	299900	341500	179000	250500	260200	356500	127200	152000	167200	209100	184100	168400	213200	-	HMDB0303167	C00378	ko01100//Metabolic pathways;ko02010//ABC transporters;ko04122//Sulfur relay system;ko00730//Thiamine metabolism	Folding, sorting and degradation;Global and overview maps;Membrane transport;Metabolism of cofactors and vitamins	Environmental Information Processing;Genetic Information Processing;Metabolism
Com_902_pos	L-Kynurenine	Carbonyl compounds	POS	208.21	C10H12N2O3	3.821	4503	6300	6253	6855	17660	11070	8987	15890	12880	19720	14900	32450	59820	33350	37790	7193	10386	17550	9699	15888	7001	18050	53750	24918	73710	52090	82110	50050	62580	83420	27480	20080	25520	29130	2922-83-0	HMDB0000684	C00328	ko01100//Metabolic pathways;ko00380//Tryptophan metabolism	Amino acid metabolism;Global and overview maps	Metabolism
Com_903_pos	Kynurenic acid	Quinolines and derivatives	POS	189.17	C10H7NO3	5.296	211500	199500	140500	89940	52320	73210	40450	39690	46810	43870	17600	38350	86960	61340	70500	162900	156300	125800	87760	120700	115900	102300	207100	110300	100300	119600	197100	75900	88150	129500	98740	96350	102000	72520	492-27-3	HMDB0000715	C01717	ko01100//Metabolic pathways;ko00380//Tryptophan metabolism	Amino acid metabolism;Global and overview maps	Metabolism
Com_904_pos	Phe-Phe	Amino Acid And Derivatives	POS	312.363	C18H20N2O3	6.51	25520	33010	25140	48000	56930	46060	69390	70560	66370	63060	61740	128900	234400	114900	136900	67030	78300	57870	77220	76160	59270	108400	239500	124400	149700	194800	302800	147700	176300	233900	82560	91380	69580	76670	2577-40-4	HMDB0013302	-	-	-	-
Com_905_pos	beta-Nicotyrine	Alkaloids and derivatives	POS	158.2	C10H10N2	4.91	39640	71850	52520	349900	372500	474900	761100	799900	732400	2063000	1668000	3602000	5799000	2673000	3139000	25390	29190	21480	298500	351200	309000	1069000	2476000	1194000	3703000	4160000	5773000	2605000	2851000	3165000	1533000	1530000	1355000	1455000	-	HMDB0255591	-	-	-	-
Com_906_pos	delta-Hexanolactone	Lactones	POS	114.142	C6H10O2	1	104900	125900	99620	142800	146800	167300	119100	168900	138900	110300	127200	115700	158300	94670	118800	87730	105200	122200	136500	140600	197000	156300	211200	166900	116500	101300	175100	127000	170200	127500	113500	172700	127800	153600	823-22-3	HMDB0000453	-	-	-	-
Com_907_pos	Hordatine A	Benzene and substituted derivatives	POS	550.653	C28H38N8O4	5.71	28360	19980	6690	27530	21620	33260	24370	16230	5968	47190	31810	147100	84310	44400	60090	14210	29950	19580	37470	128700	122800	101500	181100	74770	65660	228800	378600	97020	56640	88030	40650	57270	70500	59050	7073-64-5	HMDB0030461	-	-	-	-
Com_908_pos	Tricin 4'-O-(beta-guaiacylglyceryl) ether 5-O-hexosyl-O-hexoside	Flavonoids	POS	850.7	C39H46O21	7.02	48300	72020	59610	194400	121600	174800	84540	79150	67620	51480	35250	163800	237900	47310	61590	13760	11210	20020	19500	43390	20280	16130	47620	6187	18030	46840	57170	32730	30090	57580	84070	42360	81200	53950	--	--	-	-	-	-
Com_910_pos	Scopine	Organoheterocyclic compounds	POS	155.19	C8H13NO2	0.87	19380	18160	17070	23110	17060	41050	16640	17370	9774	19180	20240	43510	43400	29020	32660	20023	20430	18000	10470	21100	16000	17140	54270	26650	22962	26080	38840	28150	34910	41390	19380	20180	16270	16240	-	HMDB0258181	-	-	-	-
Com_911_pos	Linoleic acid	Fatty Acyls	POS	280.445	C18H32O2	14.46	67040	35850	92650	126300	88520	174400	113500	130200	75520	100100	144400	195600	86090	46350	260400	66620	76200	68650	65530	128700	49140	69970	153600	61780	75310	96890	160300	55320	23750	78700	44300	50610	37290	47320	-	HMDB0247706	C01595	ko01100//Metabolic pathways;ko00591//Linoleic acid metabolism;ko01040//Biosynthesis of unsaturated fatty acids	Global and overview maps;Lipid metabolism	Metabolism
Com_912_pos	Viscumamide	Amino Acid And Derivatives	POS	565.79	C30H55N5O5	6.83	15090	8228	101745	6357	9187	16885	12100	11080	11080	22460	5070	11700	50880	30040	32570	11931	7265	6898	4720	8476	5870	9163	36920	32350	16560	22000	16020	23370	43220	43680	14500	21650	25570	12260	--	--	-	-	-	-
Com_913_pos	Vitamin D2	Vitamins	POS	396.648	C28H44O	1.05	25980	19550	27750	21430	21530	35200	25040	39000	30600	29780	10110	24350	16120	25020	23310	48920	19650	44200	37630	24230	25230	37920	35450	23110	42530	16870	14360	26590	22240	22850	22270	24120	24150	24160	-	HMDB0242614	C05441	ko01100//Metabolic pathways;ko01110//Biosynthesis of secondary metabolites;ko00100//Steroid biosynthesis	Global and overview maps;Lipid metabolism	Metabolism
Com_914_pos	Xanthurenic acid	Quinolines and derivatives	POS	205.167	C10H7NO4	5.06	116170	63830	100240	112800	123000	148700	200000	209000	184800	534600	373500	984900	1666000	654300	829400	79206	101169	14740	71660	128100	79540	256100	679700	275100	989200	1097000	1529000	700400	729800	1034000	421700	372200	348900	316600	59-00-7	HMDB0000881	C02470	ko00380//Tryptophan metabolism	Amino acid metabolism	Metabolism
Com_915_pos	Xanthurenic acid O-hexoside	Nucleotide And Its Derivates	POS	367.31	C16H17NO9	4.52	507500	711400	392500	1376000	1098000	1386000	627400	714100	488600	606100	408400	1134000	1939000	872800	1065000	126500	104800	98110	219000	254500	239200	131600	420000	183800	241600	255200	513100	427300	379600	563200	539800	553400	530300	486200	--	--	-	-	-	-
Com_916_pos	LPC(1-acyl 18:1)	Phospholipid	POS	521.67	C26H52NO7P	12.76	7967000	5401000	9646000	7916000	4495000	6157000	2513000	1999000	1858000	2408000	2321000	5707000	1093000	485400	35500	4470000	4344000	4905000	4785000	9470000	6643000	2362000	5752000	2746000	1144000	1234000	2920000	819500	818700	1205000	2512000	2383000	2341000	2272000	--	--	-	-	-	-
Com_917_pos	LPC(1-acyl 18:2)	Phospholipid	POS	519.65	C26H50NO7P	12.18	2104000	2337000	3259000	3842000	3195000	5457000	3665000	3625000	3163000	3471000	3054000	7987000	2260000	925400	130000	1922000	2153000	1949000	4720000	7640000	4034000	2953000	5910000	2653000	2392000	2435000	4989000	1100000	1037000	1807000	2294000	2165000	2156000	2047000	--	--	-	-	-	-
Com_918_pos	LPC(1-acyl 16:1)	Phospholipid	POS	493.61	C24H48NO7P	11.54	131600	173500	171600	155300	135600	202600	98520	107000	102600	128200	97180	277600	51680	30600	8646	50040	54180	52990	100600	163300	137200	109100	234200	109500	59140	45740	81500	44070	74660	85790	90650	79540	64420	93130	--	--	-	-	-	-
Com_919_pos	LPC(1-acyl 16:2)	Phospholipid	POS	491.6	C24H46NO7P	10.99	4719	9867	9043	9206	9592	8475	5957	6173	5941	13260	11810	27570	4464	3898	12274	4282	7885	7686	11280	16490	14040	4411	12010	7724	8985	4885	7817	7496	7117	1722	3386	7658	4712	6670	--	--	-	-	-	-
Com_920_pos	LPC(1-acyl 16:0)	Phospholipid	POS	495.63	C24H50NO7P	12.59	697800	545200	1271000	2370000	1725000	2393000	1799000	2280000	1230000	2312000	2006000	4085000	2441000	1352000	165600	615900	627000	729800	1193000	2341000	1123000	1569000	2492000	992300	1925000	2668000	5834000	1923000	1646000	3021000	983300	1048000	1022000	1060000	--	--	-	-	-	-
Com_921_pos	Limocitrin O-hexoside	Flavonoids	POS	508.43	C23H24O13	0.97	157400	239100	143700	485800	274200	195300	218500	171200	210000	47510	33720	59580	278900	78560	132600	268700	286300	222200	90650	109900	292300	203400	848100	466300	32800	31910	57800	123100	209500	161800	211000	186300	155000	182600	--	--	-	-	-	-
Com_922_pos	L-Homocystine	Amino Acid And Derivatives	POS	268.354	C8H16N2O4S2	2.5	114400	153100	90530	143300	125400	176000	139400	119500	75400	127200	102700	236700	434100	190400	2713	117400	107500	87700	169100	188800	163500	133000	556900	200400	176600	198600	305800	168800	229000	283100	131800	124200	113700	112200	626-72-2	HMDB0000676	C01817	ko00270//Cysteine and methionine metabolism	Amino acid metabolism	Metabolism
Com_923_pos	Imidazole-4-acetate	Organoheterocyclic compounds	POS	126.1	C5H6N2O2	0.96	797500	1029000	923200	1669000	1398000	1565000	1572000	1314000	1443000	1127000	955200	1231000	2056000	1443000	1501000	704700	722800	716800	1291000	1363000	1305000	1646000	2770000	1848000	899500	893200	1284000	1191000	1548000	1689000	1127000	1274000	1292000	1124000	645-65-8	HMDB0002024	C02835	ko01100//Metabolic pathways;ko00340//Histidine metabolism	Amino acid metabolism;Global and overview maps	Metabolism
Com_924_pos	Nicotinic acid adenine dinucleotide	Nucleotide And Its Derivates	POS	663.2	C21H28N7O14P2	1.04	18090	19090	65900	60600	51630	52640	42960	35610	49980	66970	17010	138300	404200	185100	116500	17000	22320	20760	27620	51000	46250	48870	182400	72320	179800	115300	245900	178100	205900	367700	80310	87730	69100	55810	6450-77-7	HMDB0001179	C00857	ko01100//Metabolic pathways;ko00760//Nicotinate and nicotinamide metabolism	Global and overview maps;Metabolism of cofactors and vitamins	Metabolism
Com_925_pos	Isoquinoline	Isoquinolines and derivatives	POS	129.1	C9H7N	4.87	55683	53899	49018	23150	22890	27120	51950	44030	44170	120500	75130	202800	237900	122400	139100	65497	58561	65572	16470	17950	21700	57410	136000	61100	177400	204200	288800	116300	145500	164800	89080	71870	88850	70290	119-65-3	HMDB0034244	-	-	-	-
Com_926_pos	D-Threose	Carbohydrates And Its Derivatives	POS	120.042	C4H8O4	1.66	39250	29820	53130	109858	116688	164199	94812	57760	79194	83400	55270	189900	226300	112400	106800	68460	99925	72340	222800	286000	203600	214300	293600	367800	236000	249400	300700	317500	379400	535200	235800	100500	110800	119200	-	HMDB0250746	-	-	-	-
Com_927_pos	Apo-13-zeaxanthinone	Ketones	POS	274.4	C18H26O2	8.84	241000	370500	279100	234900	232200	235000	209700	199900	206000	208400	205300	473700	376800	174300	219900	201100	241400	172000	287800	386600	308200	259100	920300	298600	262000	268600	375600	122500	153700	230200	236800	230100	220000	266600	-	HMDB0302026	-	-	-	-
Com_928_pos	Apigenin O-malonylhexoside	Flavonoids	POS	518.431	C24H22O13	7.46	368300	393800	338400	194000	183900	278000	150900	231700	153900	315500	223100	748800	611800	270900	275300	343100	373200	363100	377200	437500	320600	407700	1113000	387000	507300	498100	987500	263600	379700	534500	314700	343900	306000	296600	--	--	-	-	-	-
Com_929_pos	B Eupalinolide	Terpenoids	POS	462.49	C24H30O9	1.11	210800	239400	318400	227000	188900	297400	232300	242500	270900	246800	197000	209400	333100	232900	188900	134500	154100	133500	140100	236300	202100	227200	249100	112000	245500	177600	177500	208500	216800	199400	245400	181900	240000	335300	--	--	-	-	-	-
Com_930_pos	Arabidopyl shikimic acid	Alcohols and polyols	POS	352.29	C16H16O9	13.8	4065	5206	4617	13430	11450	14720	9444	11170	8032	14450	16480	34440	30850	15150	162000	5693	4735	4205	10300	15230	10730	9657	20150	10930	26670	33450	47360	13770	17080	23090	10310	6763	11840	8190	--	--	-	-	-	-
Com_931_pos	(-)-Borneol	Terpenoids	POS	154.249	C10H18O	1.06	25780	24010	21430	20230	24030	40890	23460	33500	51030	25560	17200	24240	51770	22480	28670	25830	14340	38080	33810	13680	33520	37370	48700	32090	14190	42970	35930	30830	40380	37040	33590	24400	23360	20100	--	--	-	-	-	-
Com_932_pos	N-Formylkynurenine	Carbonyl compounds	POS	236.08	C11H12N2O4	4.17	3067	4958	7263	7601	7310	9600	9745	12120	16380	19600	17750	42160	102100	51920	57360	7447	5264	4693	7073	6761	10070	18280	55360	17360	40610	55040	71120	112500	117400	156900	31180	32640	35190	21210	-	HMDB0060485	C02700	ko01100//Metabolic pathways;ko00380//Tryptophan metabolism	Amino acid metabolism;Global and overview maps	Metabolism
Com_933_pos	Prunin	Flavanones	POS	434.121	C21H22O10	7.02	16203	7022	10100	6365	19185	29734	26990	26500	8704	24984	15070	24690	16310	17920	13420	46520	40270	46420	41880	64180	20940	28240	154000	50490	58420	74500	120900	21370	28990	54530	24260	27680	20910	38620	--	--	C09099	ko00941//Flavonoid biosynthesis	Biosynthesis of other secondary metabolites	Metabolism
Com_934_pos	Diethyl glutarate	Fatty Acyls	POS	188.105	C9H16O4	0.67	24740000	39600000	21620000	32610000	27060000	42140000	27770000	21730000	24080000	42380000	29180000	62710000	72000000	41370000	51020000	19460000	20590000	17250000	21550000	25330000	28900000	27180000	83850000	37240000	27550000	27170000	44190000	38900000	45480000	60760000	31460000	31870000	29000000	31080000	-	HMDB0059879	-	-	-	-
Com_935_pos	Geraniol	Terpenoids	POS	154.25	C10H18O	10.825	99930	58030	75280	112000	90440	113900	97640	78520	78940	81780	75410	78160	80420	85790	75810	88650	95240	82210	63520	113600	97300	83680	92030	77910	85970	90650	72940	75310	98610	84250	95700	66250	92960	75480	106-24-1	HMDB0035155	C01500	ko01100//Metabolic pathways;ko01110//Biosynthesis of secondary metabolites;ko00902//Monoterpenoid biosynthesis	Global and overview maps;Metabolism of terpenoids and polyketides	Metabolism
Com_936_pos	trans-Zeatin riboside	Phytohormones	POS	351.358	C15H21N5O5	5.212	151400	254100	202300	137800	123600	250600	242700	293300	263800	316300	250400	774400	548600	160300	221300	260200	258900	275400	124000	209600	129300	234000	1140000	327300	249100	275100	508300	126500	151300	265100	250400	217700	222000	215200	-	HMDB0304506	C16431	ko01110//Biosynthesis of secondary metabolites;ko00908//Zeatin biosynthesis	Global and overview maps;Metabolism of terpenoids and polyketides	Metabolism
Com_937_pos	Methyl linoleate	Fatty Acyls	POS	294.47	C19H34O2	13.221	20040	58420	33140	24890	24840	35510	26840	28130	20990	21490	17750	47900	27650	14910	27540	32700	42570	15980	92410	110800	123000	53710	209200	61450	28700	25000	40590	21140	19510	34760	31840	27050	33950	31560	112-63-0	HMDB0034381	-	-	-	-
Com_938_pos	SDMA	Amino Acid And Derivatives	POS	202.25	C8H18N4O2	0.913	77970	97980	75450	122800	144500	184200	162300	145400	174900	237600	156400	379100	394400	205700	274800	105700	101600	69430	83480	140600	98040	186000	426400	155200	271700	247900	369800	251100	284700	341800	263700	251400	197500	179900	30344-00-4	HMDB0003334	-	-	-	-
Com_939_pos	IAA-Asp	Phytohormones	POS	290.271	C14H14N2O5	6.78	246589	11250	2861	9179	11190	13070	106700	94540	88550	2373000	1482000	4062000	17040000	9194000	10450000	251261	209989	5802	4358	24090	14170	321000	834300	354700	4493000	6503000	10740000	5330000	5843000	7936000	2398000	2252000	2331000	2300000	--	--	-	-	-	-
Com_940_pos	IAA-Glu	Phytohormones	POS	304.298	C15H16N2O5	0.72	18740	46940	20710	23760	23950	43080	43970	33970	32450	40170	39460	107900	124800	50600	84810	21090	39000	19900	23320	37020	45450	35890	199700	81640	25980	46980	84770	67640	85970	120200	48770	52000	48660	43440	-	HMDB0304379	-	-	-	-
Com_941_pos	Inosine-5'-monophosphate	Nucleotide And Its Derivates	POS	348.206	C10H13N4O8P	1.05	5935	9257	827500	26870	17400	19520	29290	29240	22320	33190	6785	40110	40190	25140	23090	7753	8645	9236	18890	25270	26200	14216	30660	25882	26550	31740	25820	30620	57870	43770	25980	23460	15380	9405	131-99-7	HMDB0000175	C00130	ko01100//Metabolic pathways;ko01110//Biosynthesis of secondary metabolites;ko00230//Purine metabolism	Global and overview maps;Nucleotide metabolism	Metabolism
Com_942_pos	Irisolidone 7-O-beta-d-glucoside	Flavonoids	POS	476.43	C23H24O11	0.97	17990	47910	12380	17830	27870	20090	27570	15350	19560	14170	13160	10670	42980	33870	26620	12200	10670	20730	12260	11960	19980	12020	20670	13070	16131	15390	17220	15210	8210	16450	32320	18870	22840	8930	--	--	-	-	-	-
Com_944_pos	Tryptamine	Indoles and derivatives	POS	160.22	C10H12N2	5.205	223800	223600	153100	264800	191500	203800	248700	220600	212600	441800	420900	994900	826900	460500	568900	147300	201600	100100	143100	190000	212900	318300	536000	320000	375900	1397000	1096000	368400	228000	276100	413100	348000	303900	288600	61-54-1	HMDB0000303	C00398	ko01100//Metabolic pathways;ko01110//Biosynthesis of secondary metabolites;ko00380//Tryptophan metabolism;ko00901//Indole alkaloid biosynthesis	Amino acid metabolism;Biosynthesis of other secondary metabolites;Global and overview maps	Metabolism
Com_945_pos	5-Aminolevulinic acid	Carbohydrates And Its Derivatives	POS	131.13	C5H9NO3	0.872	79240	89630	64400	29670	14100	25030	23020	15600	9343	15500	24170	37530	90710	55120	83560	126200	106600	111200	18910	32890	22000	45920	28960	22650	35480	57290	87490	71270	92080	90660	70550	75230	60100	69360	106-60-5	HMDB0001149	C00430	ko01100//Metabolic pathways;ko01110//Biosynthesis of secondary metabolites;ko01120//Microbial metabolism in diverse environments;ko02010//ABC transporters;ko00260//Glycine, serine and threonine metabolism;ko00860//Porphyrin metabolism	Amino acid metabolism;Global and overview maps;Membrane transport;Metabolism of cofactors and vitamins	Environmental Information Processing;Metabolism
Com_946_pos	Isoferulic Acid	Cinnamic acids and derivatives	POS	194.18	C10H10O4	7.008	63950	99960	83520	31670	42900	57580	20900	47030	59670	50020	79430	85480	107500	56900	60800	151300	156800	88220	45800	90090	74350	55180	121200	38970	128400	98660	158600	46080	47990	70960	79520	47790	49970	102900	25522-33-2	HMDB0000955	-	-	-	-
Com_947_pos	(+)-Tetrandrine	Alkaloids and derivatives	POS	622.762	C38H42N2O6	6.53	12484	8068	10826	8303	6920	10059	11175	3938	10011	8328	6904	19570	11300	3521	7276	28220	15930	21260	7791	5042	8287	14380	17960	13600	6874	7339	16130	12000	5164	5650	7617	10060	3712	14560	--	--	-	-	-	-
Com_948_pos	Poricoic acid A	Terpenoids	POS	498.703	C31H46O5	6.04	76810	68160	82290	34800	15680	50870	39300	57920	37940	42420	76660	135600	90950	55640	48850	142900	76380	112400	56410	168300	100400	143500	230700	130000	136400	162100	224900	66650	37560	70900	55720	60710	59960	77960	--	--	-	-	-	-
Com_949_pos	Homoplantaginin	Flavonoids	POS	462.403	C22H22O11	7.186	1208000	1426000	1157000	761900	645400	868100	542000	675900	535900	661100	628900	1295000	841900	285400	253100	446300	434600	310200	428800	841500	545800	224400	788800	252400	409500	365300	774900	319100	483500	577400	583400	549300	564800	503500	--	--	-	-	-	-
Com_950_pos	Efetaal	Benzene and substituted derivatives	POS	194.27	C12H18O2	9.086	84910	83020	106700	87680	101900	90580	65540	102900	86170	75250	79830	72970	87880	109600	117600	83400	141800	85770	49850	85410	113100	67090	101400	85980	59660	82280	88150	112700	75860	62520	118200	42100	106600	114000	--	--	-	-	-	-
Com_951_pos	6-Hydroxy-4-methylcoumarin	Coumarins and derivatives	POS	176.169	C10H8O3	7.104	21420	58830	62530	41660	43350	49573	44080	42300	16530	33620	19800	39520	80580	42848	33850	54450	69810	45500	34040	29850	29500	37431	56230	24410	53330	45010	60370	34350	39906	56890	60640	45520	42620	27590	--	--	-	-	-	-
Com_952_pos	Polygodial	Terpene	POS	234.334	C15H22O2	12.92	684400	600300	705400	684600	652500	656800	637400	665500	687700	654300	692000	656700	679300	686800	646000	680200	576100	720000	656700	684300	603500	608800	597000	657400	683600	640400	659400	629500	725800	633700	671400	671600	657000	603000	-	HMDB0256673	-	-	-	-
Com_953_pos	p-Nitroaniline	Benzene and substituted derivatives	POS	138.124	C6H6N2O2	2.02	32970	69580	49530	50310	38920	63180	68440	60620	62570	70130	60490	131700	189200	104700	105800	245400	261200	217200	874300	889700	843300	848500	2494000	966000	768700	919900	1205000	784300	948800	1570000	482200	460200	390500	344600	-	HMDB0246529	-	-	-	-
Com_954_pos	Phylloquinone	Vitamins	POS	450.696	C31H46O2	8.18	16970	24460	12880	6183	10320	13880	3475	9150	8102	10130	8369	14340	8897	2924	8586	14420	21560	14790	7601	12600	15990	7512	40640	13810	16090	11380	16630	2593	7342	13610	7210	6502	10650	9109	-	HMDB0304722	C02059	ko01100//Metabolic pathways;ko01110//Biosynthesis of secondary metabolites;ko00130//Ubiquinone and other terpenoid-quinone biosynthesis	Global and overview maps;Metabolism of cofactors and vitamins	Metabolism
Com_955_pos	1,2-Benzenedicarboxylic acid	Benzoic acids and derivatives	POS	166.131	C8H6O4	4.11	122600	207100	141600	832700	850900	1160000	1870000	2081000	1717000	2730000	1967000	4156000	7328000	4224000	4969000	159700	180600	156900	758000	937800	835400	2719000	5960000	2943000	5649000	6496000	8939000	5079000	5426000	6894000	3021000	2807000	2420000	2422000	88-99-3	HMDB0002107	C01606	ko01100//Metabolic pathways;ko01120//Microbial metabolism in diverse environments;ko02010//ABC transporters;ko01220//Degradation of aromatic compounds	Global and overview maps;Membrane transport	Environmental Information Processing;Metabolism
[truncated: 143 more rows]
