# Supplementary material for: Comparative Metabolomic Studies of Siberian Wildrye (Elymus sibiricus L.): A New Look at the Mechanism of Plant Drought Resistance
Source: Int J Mol Sci. 2022 Dec 27;24(1):452. doi: 10.3390/ijms24010452 (PMC9820681; doi:10.3390/ijms24010452)
Supplement: Supplementary file 1 [file ijms-24-00452-s001.zip › Table S3.xlsx]

## Sheet: Sheet1
Table S3. Differential metabolites of 25 comparison groups.
index	up/down	Pvalue	fdr	vip	Compounds	Class	Ion mode	Molecular Weight (Da)	Formula	RT	Pathway	KEGG_B_class	KEGG_A_class
Com_170_neg	up	0.000353146	0.00819749	1.01659	Isotrifoliin	Flavonoids	NEG	464.096	C21H20O12	6.59	ko01100//Metabolic pathways;ko01110//Biosynthesis of secondary metabolites;ko00944//Flavone and flavonol biosynthesis	Biosynthesis of other secondary metabolites;Global and overview maps	Metabolism
Com_164_neg	up	0.00203175	0.0511952	1.37836	Butanedioicacid	Terpenoids	NEG	532.588	C28H36O10	6.71	-	-	-
Com_471_neg	up	6.18368e-05	0.003748	1.13626	Isoquercitrin	Flavones and Flavonols	NEG	464.38	C21H20O12	6.596	ko01100//Metabolic pathways;ko01110//Biosynthesis of secondary metabolites;ko00944//Flavone and flavonol biosynthesis	Biosynthesis of other secondary metabolites;Global and overview maps	Metabolism
Com_162_neg	up	9.58273e-05	0.00418191	1.00669	Spiraeoside	Flavonoids	NEG	464.096	C21H20O12	6.59	-	-	-
Com_363_neg	up	1.24474e-05	0.00064667	3.56365	L-Glutamine	Amino Acid And Derivatives	NEG	146.14	C5H10N2O3	0.868	ko01100//Metabolic pathways;ko01120//Microbial metabolism in diverse environments;ko01230//Biosynthesis of amino acids;ko02010//ABC transporters;ko00230//Purine metabolism;ko00240//Pyrimidine metabolism;ko00970//Aminoacyl-tRNA biosynthesis;ko00630//Glyoxylate and dicarboxylate metabolism;ko00250//Alanine, aspartate and glutamate metabolism;ko00220//Arginine biosynthesis;ko00750//Vitamin B6 metabo…	Amino acid metabolism;Carbohydrate metabolism;Energy metabolism;Global and overview maps;Membrane transport;Metabolism of cofactors and vitamins;Nucleotide metabolism;Translation	Environmental Information Processing;Genetic Information Processing;Metabolism
Com_327_neg	up	1.26467e-06	0.000492795	2.80886	2,2-Dimethylsuccinic acid	Organic Acid And Its Derivatives	NEG	146.058	C6H10O4	0.84	-	-	-
Com_125_neg	up	2.88444e-05	0.00121036	1.54501	Adipic acid	Organic Acid And Its Derivatives	NEG	146.058	C6H10O4	0.86	ko01100//Metabolic pathways;ko01120//Microbial metabolism in diverse environments;ko01220//Degradation of aromatic compounds	Global and overview maps	Metabolism
Com_376_neg	up	5.54419e-06	0.000492795	1.5296	alpha-Ketoglutaric acid	Tca Cycle	NEG	146.098	C5H6O5	0.87	ko01100//Metabolic pathways;ko01110//Biosynthesis of secondary metabolites;ko01120//Microbial metabolism in diverse environments;ko01230//Biosynthesis of amino acids;ko01200//Carbon metabolism;ko01210//2-Oxocarboxylic acid metabolism;ko00310//Lysine degradation;ko00630//Glyoxylate and dicarboxylate metabolism;ko00250//Alanine, aspartate and glutamate metabolism;ko00040//Pentose and glucuronate in…	Amino acid metabolism;Carbohydrate metabolism;Global and overview maps;Metabolism of other amino acids	Metabolism
Com_1012_pos	up	0.000280036	0.00762628	1.7425	Tricin 7-O-hexoside	Flavonoids	POS	492.436	C23H24O12	7.63	-	-	-
Com_175_neg	up	5.39435e-06	0.00175824	1.19677	Warfarin Sodium	Coumarins and derivatives	NEG	330.31	C19H15O4	5.56	-	-	-
Com_670_pos	up	4.51903e-06	0.000492795	1.70418	DL-Citrulline	Amino Acid And Derivatives	POS	175.19	C6H13N3O3	0.9	-	-	-
Com_973_pos	up	0.00528207	0.039743	1.20302	Tricin 4'-O-(β-guaiacylglyceryl) ether O-hexoside	Flavonoids	POS	688.639	C33H36O16	7.4	-	-	-
Com_318_neg	up	0.00206366	0.0198415	1.10891	1-O-beta-D-Glucopyranosyl sinapate	Phenols And Its Derivatives	NEG	386.1	C17H22O10	5.88	-	-	-
Com_523_pos	up	1.14527e-06	0.000492795	4.9153	Ala-gly	Amino Acid And Derivatives	POS	146.144	C5H10N2O3	0.84	-	-	-
Com_915_pos	up	0.000381292	0.0121276	1.19581	Xanthurenic acid O-hexoside	Nucleotide And Its Derivates	POS	367.31	C16H17NO9	4.52	-	-	-
Com_413_neg	up	0.00343314	0.0314753	1.04632	Astragalin	Flavones and Flavonols	NEG	448.38	C21H20O11	7.24	ko01110//Biosynthesis of secondary metabolites;ko00944//Flavone and flavonol biosynthesis	Biosynthesis of other secondary metabolites;Global and overview maps	Metabolism
Com_580_pos	up	1.90121e-06	0.000492795	9.5143	Cycloleucine	Amino Acid And Derivatives	POS	129.157	C6H11NO2	0.84	-	-	-
Com_571_pos	up	0.0222053	0.0464099	1.90692	1-O-Caffeoyl quinic acid	Alcohols and polyols	POS	354.095	C16H18O9	5.43	-	-	-
Com_898_pos	up	1.39936e-05	0.000693956	8.93692	DL-Glutamine	Amino Acid And Derivatives	POS	146.14	C5H10N2O3	0.84	-	-	-
Com_729_pos	up	5.25655e-06	0.000492795	8.7522	D-glutamine	Amino Acid And Derivatives	POS	146.14	C5H10N2O3	0.86	ko01100//Metabolic pathways	Global and overview maps	Metabolism
Com_900_pos	up	8.38468e-06	0.000560088	10.2943	L-lysine	Amino Acid And Derivatives	POS	146.19	C6H14N2O2	0.74	ko01100//Metabolic pathways;ko01110//Biosynthesis of secondary metabolites;ko01120//Microbial metabolism in diverse environments;ko01230//Biosynthesis of amino acids;ko02010//ABC transporters;ko00970//Aminoacyl-tRNA biosynthesis;ko01210//2-Oxocarboxylic acid metabolism;ko00310//Lysine degradation;ko00960//Tropane, piperidine and pyridine alkaloid biosynthesis;ko00300//Lysine biosynthesis;ko00780/…	Amino acid metabolism;Biosynthesis of other secondary metabolites;Global and overview maps;Membrane transport;Metabolism of cofactors and vitamins;Translation	Environmental Information Processing;Genetic Information Processing;Metabolism
Com_755_pos	up	0.018095	0.115942	2.56294	C-pentosyl-chrysoeriol O-hexoside	Flavonoids	POS	594.526	C27H30O15	6.04	-	-	-
Com_764_pos	up	0.0203195	0.0800308	1.19778	LysoPC 18:1 (2n isomer)	Phospholipid	POS	521.4	C26H52NO7P	12.7	-	-	-
Com_464_neg	up	0.00931558	0.116272	1.16313	3-O-p-Coumaroylquinic acid	Phenolic acids	NEG	338.1	C16H18O8	5.92	-	-	-
Com_916_pos	up	0.024565	0.0890378	1.16719	LPC(1-acyl 18:1)	Phospholipid	POS	521.67	C26H52NO7P	12.76	-	-	-
Com_1037_pos	up	1.67567e-05	0.000794851	6.92287	Lysine	Amino Acid And Derivatives	POS	146.188	C6H14N2O2	0.85	-	-	-
Com_321_neg	up	0.00364337	0.0709806	1.07815	UDP-D-glucose	Nucleotide And Its Derivates	NEG	566.1	C15H24N2O17P2	0.95	ko01100//Metabolic pathways;ko01110//Biosynthesis of secondary metabolites;ko00052//Galactose metabolism;ko00520//Amino sugar and nucleotide sugar metabolism;ko00908//Zeatin biosynthesis;ko00040//Pentose and glucuronate interconversions;ko00053//Ascorbate and aldarate metabolism;ko00500//Starch and sucrose metabolism;ko00561//Glycerolipid metabolism	Carbohydrate metabolism;Global and overview maps;Lipid metabolism;Metabolism of terpenoids and polyketides	Metabolism
Com_620_pos	up	3.98608e-05	0.00149959	7.49331	Dl-Alanyl-glycine	Amino Acid And Derivatives	POS	146.144	C5H10N2O3	0.84	-	-	-
Com_626_pos	up	4.02501e-06	0.000492795	9.84232	Glutamine	Amino Acid And Derivatives	POS	146.145	C5H10N2O3	0.81	-	-	-
Com_163_neg	up	0.0033475	0.0133447	1.27298	Saponarin	Flavonoids	NEG	594.518	C27H30O15	6.27	-	-	-
Com_139_neg	up	0.00233849	0.0653156	1.38224	UDP-galactose	Nucleotide And Its Derivates	NEG	610.265	C15H22N2Na2O17P2	0.92	ko01100//Metabolic pathways;ko00052//Galactose metabolism;ko00520//Amino sugar and nucleotide sugar metabolism	Carbohydrate metabolism;Global and overview maps	Metabolism
Com_326_neg	up	0.00120129	0.0143819	1.26252	L-threo-3-Methylaspartate	Amino Acid And Derivatives	NEG	147.053	C5H9NO4	0.87	ko01100//Metabolic pathways;ko01120//Microbial metabolism in diverse environments;ko01200//Carbon metabolism;ko00630//Glyoxylate and dicarboxylate metabolism;ko00660//C5-Branched dibasic acid metabolism	Carbohydrate metabolism;Global and overview maps	Metabolism
Com_335_neg	up	0.0135123	0.0996078	1.36954	Vitexin-2-O-rhaMnoside	Flavonoids	NEG	578.52	C27H30O14	6.411	-	-	-
Com_74_neg	up	0.0101113	0.118989	1.20728	Apigenin 5-O-glucoside	Flavonoids	NEG	432.38	C21H20O10	6.68	-	-	-
Com_219_neg	up	0.00157075	0.0203733	1.17237	Dl-Glutamic acid	Amino Acid And Derivatives	NEG	147.129	C5H9NO4	0.87	ko01100//Metabolic pathways;ko00460//Cyanoamino acid metabolism	Global and overview maps;Metabolism of other amino acids	Metabolism
Com_732_pos	up	0.000928792	0.00686208	2.0851	L-Ornithine	Amino Acid And Derivatives	POS	132.16	C5H12N2O2	0.762	ko01100//Metabolic pathways;ko01110//Biosynthesis of secondary metabolites;ko01230//Biosynthesis of amino acids;ko02010//ABC transporters;ko00330//Arginine and proline metabolism;ko01210//2-Oxocarboxylic acid metabolism;ko00480//Glutathione metabolism;ko00220//Arginine biosynthesis	Amino acid metabolism;Global and overview maps;Membrane transport;Metabolism of other amino acids	Environmental Information Processing;Metabolism
Com_41_neg	up	0.0123448	0.0975848	2.28875	Chrysoeriol 6-C-pentosyl-O-rutinoside	Flavonoids	NEG	741.1	C33H40O19	6.08	-	-	-
Com_412_neg	up	0.000458071	0.00499756	2.05748	Neochlorogenic acid	Polyphenol	NEG	354.309	C16H18O9	4.879	-	-	-
Com_180_neg	up	0.000295651	0.0111226	1.02064	Esculin	Coumarins and derivatives	NEG	340.28	C15H16O9	5.145	-	-	-
Com_880_pos	up	0.000431344	0.00472495	2.08861	Kaempferol 3-O-glucoside-2‘-O-rhamnoside	Flavones and Flavonols	POS	594.526	C27H30O15	6.08	-	-	-
Com_879_pos	up	0.00591729	0.0339777	1.39912	Tricin O-malonylhexoside	Flavonoids	POS	578.47	C26H26O15	7.5	-	-	-
Com_674_pos	up	0.00200702	0.0114642	2.82897	L-arginine	Amino Acid And Derivatives	POS	174.2	C6H14N4O2	0.794	ko01100//Metabolic pathways;ko01110//Biosynthesis of secondary metabolites;ko01230//Biosynthesis of amino acids;ko02010//ABC transporters;ko00330//Arginine and proline metabolism;ko00970//Aminoacyl-tRNA biosynthesis;ko00220//Arginine biosynthesis;ko00261//Monobactam biosynthesis	Amino acid metabolism;Biosynthesis of other secondary metabolites;Global and overview maps;Membrane transport;Translation	Environmental Information Processing;Genetic Information Processing;Metabolism
Com_988_pos	up	0.000213703	0.00342867	4.13144	D-Arabitol	Sugar Alcohols	POS	152.15	C5H12O5	0.926	ko01100//Metabolic pathways;ko00040//Pentose and glucuronate interconversions	Carbohydrate metabolism;Global and overview maps	Metabolism
Com_265_neg	up	0.000103425	0.00238299	1.02492	4-Hydroxyisoleucine	Amino Acid And Derivatives	NEG	147.172	C6H13NO3	1.038	-	-	-
Com_1084_pos	up	0.0295503	0.147054	1.3339	(-)-Norepinephrine N-hexoside	Glycosides	POS	331.32	C14H21NO8	1.05	-	-	-
Com_709_pos	up	0.0458956	0.180664	2.75877	C-hexosyl-apigenin C-pentoside	Flavonoids	POS	564.1	C26H28O14	6.07	-	-	-
Com_275_neg	up	0.0449158	0.25367	1.03803	GA7-1	Phytohormones	NEG	330.4	C19H22O5	9.22	-	-	-
Com_853_pos	up	0.00299069	0.0150401	1.35771	Hecogenin	Flavonoids	POS	430.628	C27H42O4	6.08	-	-	-
Com_753_pos	up	0.00556962	0.0232815	2.552	Luteolin C-hexoside derivative	Flavonoids	POS	448.4	C21H20O11	6.1	-	-	-
Com_881_pos	up	0.0215159	0.129765	1.17162	C-hexosyl-luteolin O-hexoside	Flavonoids	POS	610.518	C27H30O16	5.68	-	-	-
Com_837_pos	up	0.0149984	0.168055	1.23262	Solanidine	Steroids and steroid derivatives	POS	397.636	C27H43NO	0.96	-	-	-
Com_16_neg	up	0.0110872	0.0541968	1.158	4-O-p-Coumaroylquinic acid	Phenolic acids	NEG	338.1	C16H18O8	5.93	-	-	-
Com_613_pos	up	0.00220506	0.012089	2.27639	Apigenin C-glucoside	Flavonoids	POS	432.113	C21H20O10	6.46	-	-	-
Com_67_neg	up	0.00303961	0.0150737	4.98464	1-Caffeoylquinic acid	Phenolic acids	NEG	354.095	C16H18O9	5.46	-	-	-
Com_336_neg	up	0.00760302	0.0281183	3.93605	Isoorientin	Flavones and Flavonols	NEG	448.38	C21H20O11	6.174	-	-	-
Com_498_pos	up	0.0274357	0.110045	1.09512	Chrysoeriol C-hexoside	Flavonoids	POS	462.404	C22H22O11	6.72	-	-	-
Com_304_neg	up	0.0103656	0.0355037	2.80022	Orientin	Flavones and Flavonols	NEG	448.377	C21H20O11	6.25	-	-	-
Com_738_pos	up	0.0058473	0.0641719	1.3479	4-Hydroxymandelonitrile	Phenols And Its Derivatives	POS	149.048	C8H7NO2	1.44	-	-	-
Com_146_neg	up	0.0144456	0.062293	2.75716	1-O-p-Coumaroyl quinic acid	Alcohols and polyols	NEG	338.1	C16H18O8	5.95	-	-	-
Com_533_pos	up	0.00440999	0.0261483	1.11137	Tricin 5-O-hexoside	Flavonoids	POS	492.43	C23H24O12	7.19	-	-	-
Com_545_pos	up	0.00887949	0.0246502	1.13983	C-pentosyl-C-hexosyl-apigenin	Flavonoids	POS	564.49	C26H28O14	6.05	-	-	-
Com_173_neg	up	0.000675386	0.0433439	1.04856	2-Amino-3-hydroxypropionic acid	Amino Acid And Derivatives	NEG	105.09	C3H7NO3	0.83	-	-	-
Com_160_neg	up	0.0241386	0.199431	1.27902	D-Fructose 6-Phosphate	Carbohydrates And Its Derivatives	NEG	260.136	C6H13O9P	0.86	ko01100//Metabolic pathways;ko01110//Biosynthesis of secondary metabolites;ko01120//Microbial metabolism in diverse environments;ko01200//Carbon metabolism;ko00052//Galactose metabolism;ko00710//Carbon fixation in photosynthetic organisms;ko00500//Starch and sucrose metabolism;ko04931//Insulin resistance	Carbohydrate metabolism;Endocrine and metabolic disease;Energy metabolism;Global and overview maps	Human Diseases;Metabolism
Com_380_neg	up	0.0118977	0.0385175	2.58628	Vitexin	Flavones and Flavonols	NEG	432.38	C21H20O10	6.559	ko00944//Flavone and flavonol biosynthesis;ko00941//Flavonoid biosynthesis	Biosynthesis of other secondary metabolites	Metabolism
Com_668_pos	up	0.00399392	0.0183855	1.10455	L-Alanine	Amino Acid And Derivatives	POS	89.09	C3H7NO2	0.86	ko01100//Metabolic pathways;ko01110//Biosynthesis of secondary metabolites;ko01120//Microbial metabolism in diverse environments;ko01230//Biosynthesis of amino acids;ko02010//ABC transporters;ko01200//Carbon metabolism;ko00270//Cysteine and methionine metabolism;ko00970//Aminoacyl-tRNA biosynthesis;ko00710//Carbon fixation in photosynthetic organisms;ko00250//Alanine, aspartate and glutamate meta…	Amino acid metabolism;Drug resistance: antimicrobial;Energy metabolism;Folding, sorting and degradation;Global and overview maps;Membrane transport;Metabolism of other amino acids;Translation	Environmental Information Processing;Genetic Information Processing;Human Diseases;Metabolism
Com_258_neg	up	0.00650063	0.02542	2.51184	Isovitexin	Flavones and Flavonols	NEG	432.378	C21H20O10	6.533	ko00944//Flavone and flavonol biosynthesis	Biosynthesis of other secondary metabolites	Metabolism
Com_448_neg	up	0.0102878	0.0883779	1.68438	Tricin 5-O-rutinoside	Flavonoids	NEG	638.1	C29H34O16	6.88	-	-	-
Com_330_neg	up	0.0248321	0.138273	1.06255	Eicosadienoic acid	Fatty Acyls	NEG	308.272	C20H36O2	6.32	ko01040//Biosynthesis of unsaturated fatty acids	Lipid metabolism	Metabolism
Com_188_neg	up	0.0334357	0.199335	1.08793	Methylmalonate	Organic Acid And Its Derivatives	NEG	118.09	C4H6O4	1.938	ko01100//Metabolic pathways;ko00240//Pyrimidine metabolism;ko00640//Propanoate metabolism;ko00280//Valine, leucine and isoleucine degradation	Amino acid metabolism;Carbohydrate metabolism;Global and overview maps;Nucleotide metabolism	Metabolism
Com_300_neg	up	0.00318972	0.0183312	1.36018	Succinic anhydride	Organic Acid And Its Derivatives	NEG	100.073	C4H4O3	0.88	-	-	-
Com_382_neg	up	0.0370424	0.165126	1.07551	Luteolin 7-O-glucoside	Flavonoids	NEG	448.38	C21H20O11	6.664	ko00944//Flavone and flavonol biosynthesis	Biosynthesis of other secondary metabolites	Metabolism
Com_510_pos	up	0.0300643	0.0587727	1.65525	Schaftoside	Flavones and Flavonols	POS	564.492	C26H28O14	6.074	-	-	-
Com_500_pos	up	0.000970583	0.00701262	1.33606	Sarcosine	Amino Acid And Derivatives	POS	89.093	C3H7NO2	0.9	ko01100//Metabolic pathways;ko00330//Arginine and proline metabolism;ko00260//Glycine, serine and threonine metabolism	Amino acid metabolism;Global and overview maps	Metabolism
Com_714_pos	up	0.0285828	0.0760881	1.51321	Adenine	Purines and purine derivatives	POS	135.127	C5H5N5	1.032	ko01100//Metabolic pathways;ko01110//Biosynthesis of secondary metabolites;ko00230//Purine metabolism;ko00908//Zeatin biosynthesis	Global and overview maps;Metabolism of terpenoids and polyketides;Nucleotide metabolism	Metabolism
Com_130_neg	up	0.0283118	0.0922036	1.16917	Caffeic acid	Cinnamic acids and derivatives	NEG	180.16	C9H8O4	5.801	-	-	-
Com_473_neg	up	0.022602	0.0827475	1.38581	Quinic acid	Alcohols and polyols	NEG	192.17	C7H12O6	0.998	ko01100//Metabolic pathways;ko00400//Phenylalanine, tyrosine and tryptophan biosynthesis	Amino acid metabolism;Global and overview maps	Metabolism
Com_350_neg	up	0.0128722	0.0980866	1.08255	Chlorogenic acid methyl ester	Alcohols and polyols	NEG	368.111	C17H20O9	5.7	-	-	-
Com_9_neg	up	0.0224043	0.0602047	2.42538	Isoschaftoside	Flavones and Flavonols	NEG	564.499	C26H28O14	6.03	-	-	-
Com_356_neg	up	0.028019	0.143367	1.0243	beta-D-Lactose	Carbohydrates And Its Derivatives	NEG	342.297	C12H22O11	1	-	-	-
Com_218_neg	up	0.0113644	0.0375715	2.03914	Aspartate	Amino Acid And Derivatives	NEG	133.103	C4H7NO4	0.85	-	-	-
Com_1065_pos	up	0.0037742	0.0326798	1.24724	1-Aminocyclopropanecarboxylic acid	Phytohormones	POS	101.1	C4H7NO2	0.894	ko01100//Metabolic pathways;ko01110//Biosynthesis of secondary metabolites;ko00270//Cysteine and methionine metabolism	Amino acid metabolism;Global and overview maps	Metabolism
Com_770_pos	up	0.0368937	0.0985214	1.10129	L-Dihydroorotic acid	Amino Acid And Derivatives	POS	158.112	C5H6N2O4	0.92	ko01100//Metabolic pathways;ko00240//Pyrimidine metabolism	Global and overview maps;Nucleotide metabolism	Metabolism
Com_768_pos	up	0.0178032	0.051265	1.47826	D-Serine	Amino Acid And Derivatives	POS	105.09	C3H7NO3	0.851	ko01100//Metabolic pathways;ko00260//Glycine, serine and threonine metabolism;ko01502//Vancomycin resistance	Amino acid metabolism;Drug resistance: antimicrobial;Global and overview maps	Human Diseases;Metabolism
Com_956_pos	up	5.03008e-05	0.0230701	1.28911	Phosphoric Acid	Organic Acid And Its Derivatives	POS	97.995	H3O4P	11.01	ko02010//ABC transporters;ko00190//Oxidative phosphorylation;ko00195//Photosynthesis	Energy metabolism;Membrane transport	Environmental Information Processing;Metabolism
Com_530_pos	up	0.0489453	0.153888	1.32517	Homoserine	Amino Acid And Derivatives	POS	119.119	C4H9NO3	0.9	ko01100//Metabolic pathways;ko01110//Biosynthesis of secondary metabolites;ko01120//Microbial metabolism in diverse environments;ko01230//Biosynthesis of amino acids;ko00270//Cysteine and methionine metabolism;ko00260//Glycine, serine and threonine metabolism;ko00300//Lysine biosynthesis;ko00920//Sulfur metabolism	Amino acid metabolism;Energy metabolism;Global and overview maps	Metabolism
Com_568_pos	down	0.00141261	0.00931134	2.75785	N-acetylglycine	Amino Acid And Derivatives	POS	117.043	C4H7NO3	0.91	-	-	-
Com_802_pos	down	0.00302376	0.0150636	1.70029	Lysine butyrate	Amino Acid And Derivatives	POS	234.1	C10H22N2O4	0.89	-	-	-
Com_586_pos	down	0.0223059	0.11066	3.35755	Betaine	Alkaloids and derivatives	POS	117.15	C5H11NO2	0.907	ko01100//Metabolic pathways;ko02010//ABC transporters;ko00260//Glycine, serine and threonine metabolism	Amino acid metabolism;Global and overview maps;Membrane transport	Environmental Information Processing;Metabolism
Com_726_pos	down	0.0257656	0.0656783	1.44457	4-Aminobutyric acid	Amino Acid And Derivatives	POS	103.12	C4H9NO2	0.864	ko01100//Metabolic pathways;ko01120//Microbial metabolism in diverse environments;ko00330//Arginine and proline metabolism;ko00760//Nicotinate and nicotinamide metabolism;ko00250//Alanine, aspartate and glutamate metabolism;ko00410//beta-Alanine metabolism;ko00650//Butanoate metabolism	Amino acid metabolism;Carbohydrate metabolism;Global and overview maps;Metabolism of cofactors and vitamins;Metabolism of other amino acids	Metabolism
Com_813_pos	down	0.014713	0.0449632	1.19054	N-Methylsarcosine	Amino Acid And Derivatives	POS	103.12	C4H9NO2	0.9	ko01100//Metabolic pathways;ko00260//Glycine, serine and threonine metabolism	Amino acid metabolism;Global and overview maps	Metabolism
Com_623_pos	down	0.00871938	0.0332617	3.47268	Dl-Norleucine	Amino Acid And Derivatives	POS	131.173	C6H13NO2	0.9	-	-	-
Com_787_pos	down	0.010527	0.0355571	1.58879	2-Aminoisobutyric acid	Amino Acid And Derivatives	POS	103.063	C4H9NO2	0.82	-	-	-
Com_808_pos	down	0.039366	0.135912	1.24604	Cytidine	Nucleotide And Its Derivates	POS	243.22	C9H13N3O5	1.029	ko01100//Metabolic pathways;ko02010//ABC transporters;ko00240//Pyrimidine metabolism	Global and overview maps;Membrane transport;Nucleotide metabolism	Environmental Information Processing;Metabolism
Com_18_neg	down	0.0229274	0.132348	1.03794	1-O-Gentisoyl-D-glucoside	Phenolic acids	NEG	316.079	C13H16O9	4.56	-	-	-
Com_296_neg	down	0.0136476	0.105667	1.28441	D-Glucose 6-phosphate	Carbohydrates And Its Derivatives	NEG	260.03	C6H13O9P	0.86	ko01100//Metabolic pathways;ko01110//Biosynthesis of secondary metabolites;ko00500//Starch and sucrose metabolism;ko04931//Insulin resistance;ko00562//Inositol phosphate metabolism	Carbohydrate metabolism;Endocrine and metabolic disease;Global and overview maps	Human Diseases;Metabolism
Com_999_pos	down	0.0400079	0.0897517	1.38655	S-Methyl-L-cysteine	Amino Acid And Derivatives	POS	135.185	C4H9NO2S	1.04	ko02010//ABC transporters	Membrane transport	Environmental Information Processing
Com_773_pos	down	0.0228481	0.098139	1.14373	Nicotinamide	Vitamins	POS	122.12	C6H6N2O	1.539	ko01100//Metabolic pathways;ko00760//Nicotinate and nicotinamide metabolism	Global and overview maps;Metabolism of cofactors and vitamins	Metabolism
Com_171_neg	down	0.00648828	0.0775504	1.41941	alpha-D-Galactose 1-phosphate	Carbohydrates And Its Derivatives	NEG	260.136	C6H13O9P	0.87	ko01100//Metabolic pathways;ko00052//Galactose metabolism;ko00520//Amino sugar and nucleotide sugar metabolism	Carbohydrate metabolism;Global and overview maps	Metabolism
Com_987_pos	down	0.0308199	0.214964	1.03719	Isonicotinic acid	Vitamins	POS	123.11	C6H5NO2	1.029	-	-	-
Com_316_neg	down	0.0166048	0.0485679	1.19511	Kaempferol 3-O-robinobioside	Flavones and Flavonols	NEG	594.159	C27H30O15	6.55	-	-	-
Com_381_neg	down	0.0490729	0.130582	1.15863	Isorhoifolin	Flavonoids	NEG	578.52	C27H30O14	6.84	-	-	-
Com_638_pos	down	0.0121715	0.0304156	1.44474	Pipecolic acid	Amino Acid And Derivatives	POS	129.16	C6H11NO2	1.042	ko01100//Metabolic pathways;ko01110//Biosynthesis of secondary metabolites;ko00310//Lysine degradation;ko00960//Tropane, piperidine and pyridine alkaloid biosynthesis	Amino acid metabolism;Biosynthesis of other secondary metabolites;Global and overview maps	Metabolism
Com_37_neg	down	0.00613797	0.02709	2.08235	Chrysoeriol 8-C-pentosyl-O-rutinoside	Flavonoids	NEG	740.2	C33H40O19	6.18	-	-	-
Com_657_pos	down	0.0307032	0.077005	1.7067	Aminopurine	Purines and purine derivatives	POS	135.1	C5H5N5	1.24	-	-	-
Com_673_pos	down	0.0272247	0.0685963	1.76656	D-Proline	Amino Acid And Derivatives	POS	115.13	C5H9NO2	0.967	ko01100//Metabolic pathways;ko00330//Arginine and proline metabolism	Amino acid metabolism;Global and overview maps	Metabolism
Com_355_neg	down	0.00951651	0.0333843	1.39047	gamma,gamma-Dimethylallyl pyrophosphate	Prenol lipids	NEG	246.092	C5H12O7P2	0.95	ko01100//Metabolic pathways;ko01110//Biosynthesis of secondary metabolites;ko00908//Zeatin biosynthesis;ko00740//Riboflavin metabolism;ko00900//Terpenoid backbone biosynthesis	Global and overview maps;Metabolism of cofactors and vitamins;Metabolism of terpenoids and polyketides	Metabolism
Com_415_neg	down	0.011201	0.33152	1.14225	D-Xylonic acid	Organic Acid And Its Derivatives	NEG	166.048	C5H10O6	0.9	-	-	-
Com_661_pos	down	0.0333408	0.132904	1.07061	Trigonelline	Alkaloids and derivatives	POS	137.136	C7H7NO2	1	ko00760//Nicotinate and nicotinamide metabolism	Metabolism of cofactors and vitamins	Metabolism
Com_236_neg	down	0.00151135	0.0182671	1.01536	Salicylic acid O-glucoside	Phytohormones	NEG	300.1	C13H16O8	4.14	-	-	-
Com_713_pos	down	0.0359984	0.13927	1.98885	beta-Alanine methyl ester hydrochloride	Amino Acid And Derivatives	POS	139.58	C4H10ClNO2	0.98	-	-	-
Com_224_neg	down	0.0194884	0.186507	1.41031	Cryptochlorogenic acid	Alcohols and polyols	NEG	354.309	C16H18O9	5.443	-	-	-
Com_217_neg	down	7.33825e-05	0.0110856	1.07164	D-Gluconic acid	Carbohydrates And Its Derivatives	NEG	196.155	C6H12O7	0.91	ko01100//Metabolic pathways;ko01110//Biosynthesis of secondary metabolites;ko01120//Microbial metabolism in diverse environments;ko01200//Carbon metabolism;ko00030//Pentose phosphate pathway	Carbohydrate metabolism;Global and overview maps	Metabolism
Com_814_pos	down	0.0233099	0.113027	1.09565	3-Amino-2-methylpropanoic acid	Amino Acid And Derivatives	POS	103.12	C4H9NO2	0.931	-	-	-
Com_550_pos	down	0.0279365	0.0729172	1.90082	N2-Acetyl-L-lysine	Amino Acid And Derivatives	POS	188.224	C8H16N2O3	1.03	-	-	-
Com_503_pos	down	0.0203148	0.108115	1.59634	R-Aminobutyrate	Organic Acid And Its Derivatives	POS	103.12	C4H9NO2	0.91	-	-	-
Com_700_pos	down	0.0133706	0.0417976	1.28201	sn-Glycero-3-phosphocholine	Glycerophospholipids	POS	257.22	C8H20NO6P	0.91	ko00564//Glycerophospholipid metabolism;ko00565//Ether lipid metabolism	Lipid metabolism	Metabolism
Com_624_pos	down	0.000372441	0.00420237	1.72873	Proline	Amino Acid And Derivatives	POS	115.131	C5H9NO2	0.96	-	-	-
Com_817_pos	down	0.000966614	0.00701262	2.70888	L-Glutamic acid	Amino Acid And Derivatives	POS	147.13	C5H9NO4	0.886	ko01100//Metabolic pathways;ko01110//Biosynthesis of secondary metabolites;ko01120//Microbial metabolism in diverse environments;ko01230//Biosynthesis of amino acids;ko02010//ABC transporters;ko01200//Carbon metabolism;ko00330//Arginine and proline metabolism;ko00970//Aminoacyl-tRNA biosynthesis;ko01210//2-Oxocarboxylic acid metabolism;ko00630//Glyoxylate and dicarboxylate metabolism;ko00480//Glu…	Amino acid metabolism;Biosynthesis of other secondary metabolites;Carbohydrate metabolism;Energy metabolism;Global and overview maps;Membrane transport;Metabolism of cofactors and vitamins;Metabolism of other amino acids;Translation	Environmental Information Processing;Genetic Information Processing;Metabolism
Com_639_pos	down	0.0232605	0.13287	1.74202	L-Pipecolate	Amino Acid And Derivatives	POS	129.16	C6H11NO2	1.049	ko01100//Metabolic pathways;ko01110//Biosynthesis of secondary metabolites;ko00310//Lysine degradation;ko00960//Tropane, piperidine and pyridine alkaloid biosynthesis	Amino acid metabolism;Biosynthesis of other secondary metabolites;Global and overview maps	Metabolism
Com_157_neg	down	0.013407	0.0706619	1.38627	Kaempferol7-O-beta-D-glucopyranoside	Flavones and Flavonols	NEG	448.377	C21H20O11	6.65	-	-	-
Com_522_pos	down	5.24424e-05	0.00168149	1.99011	Aspartic Acid	Amino Acid And Derivatives	POS	133.103	C4H7NO4	0.84	-	-	-
Com_577_pos	down	3.84126e-05	0.00149672	1.92966	Dl-3-Hydroxynorvaline	Amino Acid And Derivatives	POS	133.146	C5H11NO3	0.85	-	-	-
Com_247_neg	down	0.0374741	0.139882	1.12504	Lonicerin	Flavonoids	NEG	594.526	C27H30O15	6.73	-	-	-
Com_204_neg	down	0.0257719	0.366436	1.06365	cis-Aconitic acid	Tca Cycle	NEG	174.11	C6H6O6	1.766	ko01100//Metabolic pathways;ko01110//Biosynthesis of secondary metabolites;ko01120//Microbial metabolism in diverse environments;ko01210//2-Oxocarboxylic acid metabolism;ko00630//Glyoxylate and dicarboxylate metabolism;ko00020//Citrate cycle (TCA cycle);ko00660//C5-Branched dibasic acid metabolism	Carbohydrate metabolism;Global and overview maps	Metabolism
Com_995_pos	down	0.00854987	0.0305397	1.3078	Kaempferol-3-O-rutinoside	Flavonoids	POS	594.526	C27H30O15	6.51	ko01110//Biosynthesis of secondary metabolites;ko00944//Flavone and flavonol biosynthesis	Biosynthesis of other secondary metabolites;Global and overview maps	Metabolism
Com_737_pos	down	0.0245783	0.0674997	1.13518	D-Proline betaine	Amino Acid And Derivatives	POS	144.092	C7H14NO2+	1	-	-	-
Com_124_neg	down	0.00572261	0.120065	1.40906	Chlorogenic Acid	Alcohols and polyols	NEG	354.31	C16H18O9	5.37	ko01110//Biosynthesis of secondary metabolites;ko00941//Flavonoid biosynthesis;ko00940//Phenylpropanoid biosynthesis;ko00945//Stilbenoid, diarylheptanoid and gingerol biosynthesis	Biosynthesis of other secondary metabolites;Global and overview maps	Metabolism
Com_799_pos	down	0.00322945	0.0303736	1.43501	Octadecadien-6-ynoic acid	Fatty Acyls	POS	276.2	C18H28O2	12.1	-	-	-
Com_362_neg	down	3.63339e-06	0.000492795	1.63669	L-Asparagine	Amino Acid And Derivatives	NEG	132.12	C4H8N2O3	0.843	ko01100//Metabolic pathways;ko01110//Biosynthesis of secondary metabolites;ko01230//Biosynthesis of amino acids;ko00970//Aminoacyl-tRNA biosynthesis;ko00250//Alanine, aspartate and glutamate metabolism;ko00460//Cyanoamino acid metabolism	Amino acid metabolism;Global and overview maps;Metabolism of other amino acids;Translation	Genetic Information Processing;Metabolism
Com_431_neg	down	0.00154566	0.0290744	1.07001	D-Galactonic acid	Organic Acid And Its Derivatives	NEG	196.155	C6H12O7	0.92	ko01100//Metabolic pathways;ko01120//Microbial metabolism in diverse environments;ko00052//Galactose metabolism	Carbohydrate metabolism;Global and overview maps	Metabolism
Com_96_neg	down	0.0250148	0.064518	1.47102	Isocitrate	Organic Acid And Its Derivatives	NEG	192.124	C6H8O7	1.49	ko01100//Metabolic pathways;ko01110//Biosynthesis of secondary metabolites;ko01120//Microbial metabolism in diverse environments;ko01230//Biosynthesis of amino acids;ko01200//Carbon metabolism;ko01210//2-Oxocarboxylic acid metabolism;ko00630//Glyoxylate and dicarboxylate metabolism;ko00020//Citrate cycle (TCA cycle)	Carbohydrate metabolism;Global and overview maps	Metabolism
Com_686_pos	down	0.00130747	0.0171246	1.35364	14,15-Dehydrocrepenynic acid	Fatty Acyls	POS	276.414	C18H28O2	12.15	-	-	-
Com_210_neg	down	0.0111502	0.0650527	1.47524	Trifolin	Flavonoids	NEG	448.101	C21H20O11	6.62	ko01110//Biosynthesis of secondary metabolites;ko00944//Flavone and flavonol biosynthesis	Biosynthesis of other secondary metabolites;Global and overview maps	Metabolism
Com_1004_pos	down	0.0479375	0.228223	1.12315	Chrysoeriol O-malonylhexoside	Flavonoids	POS	548.457	C25H24O14	7.51	-	-	-
Com_513_pos	down	0.0498626	0.261539	1.19576	Cyanidin 3-O-malonylhexoside	Anthocyanins	POS	535.1	C24H23O14	6.73	-	-	-
Com_669_pos	down	0.000183147	0.00312208	2.92936	L-aspartic Acid	Amino Acid And Derivatives	POS	133.1	C4H7NO4	0.86	ko01100//Metabolic pathways;ko01110//Biosynthesis of secondary metabolites;ko01120//Microbial metabolism in diverse environments;ko01230//Biosynthesis of amino acids;ko02010//ABC transporters;ko01200//Carbon metabolism;ko00270//Cysteine and methionine metabolism;ko00970//Aminoacyl-tRNA biosynthesis;ko01210//2-Oxocarboxylic acid metabolism;ko00260//Glycine, serine and threonine metabolism;ko00710/…	Amino acid metabolism;Biosynthesis of other secondary metabolites;Energy metabolism;Global and overview maps;Membrane transport;Metabolism of cofactors and vitamins;Metabolism of other amino acids;Translation	Environmental Information Processing;Genetic Information Processing;Metabolism
Com_195_neg	down	0.0401011	0.231483	1.07492	2–furanoic acid	Organic Acid And Its Derivatives	NEG	112.084	C5H4O3	1.49	-	-	-
Com_384_neg	down	0.030113	0.147054	1.1223	UDP	Nucleotide And Its Derivates	NEG	404.16	C9H14N2O12P2	0.7	ko01100//Metabolic pathways;ko00240//Pyrimidine metabolism;ko00908//Zeatin biosynthesis	Global and overview maps;Metabolism of terpenoids and polyketides;Nucleotide metabolism	Metabolism
Com_778_pos	down	0.000233003	0.00343521	2.15709	DL-Norvaline	Amino Acid And Derivatives	POS	117.15	C5H11NO2	1.068	-	-	-
Com_445_neg	down	0.000118716	0.0025396	2.68655	L(-)-Malic acid	Tca Cycle	NEG	134.022	C4H6O5	1.08	-	-	-
Com_625_pos	down	0.000553414	0.00503146	2.02537	Valine	Amino Acid And Derivatives	POS	117.146	C5H11NO2	1.09	-	-	-
Com_934_pos	down	0.0110655	0.0284727	2.3293	Diethyl glutarate	Fatty Acyls	POS	188.105	C9H16O4	0.67	-	-	-
Com_378_neg	down	0.0158753	0.143027	1.10252	Rutin	Flavones and Flavonols	NEG	610.518	C27H30O16	6.451	ko01100//Metabolic pathways;ko01110//Biosynthesis of secondary metabolites;ko00944//Flavone and flavonol biosynthesis	Biosynthesis of other secondary metabolites;Global and overview maps	Metabolism
Com_552_pos	down	0.00112042	0.00768793	1.46181	N-Methyl-a-aminoisobutyric acid	Amino Acid And Derivatives	POS	117.146	C5H11NO2	1.22	-	-	-
Com_202_neg	down	0.0019089	0.0111752	1.4543	Citric acid	Tca Cycle	NEG	192.12	C6H8O7	1.516	ko01100//Metabolic pathways;ko01110//Biosynthesis of secondary metabolites;ko01120//Microbial metabolism in diverse environments;ko01230//Biosynthesis of amino acids;ko01200//Carbon metabolism;ko01210//2-Oxocarboxylic acid metabolism;ko00630//Glyoxylate and dicarboxylate metabolism;ko00250//Alanine, aspartate and glutamate metabolism;ko00020//Citrate cycle (TCA cycle)	Amino acid metabolism;Carbohydrate metabolism;Global and overview maps	Metabolism
Com_193_neg	down	0.0457183	0.248153	1.0503	D-3-Phosphoglyceric acid	Sugar Acids And Its Derivatives	NEG	230.021	C3H5H2O7P	0.95	ko01100//Metabolic pathways;ko01110//Biosynthesis of secondary metabolites;ko01120//Microbial metabolism in diverse environments;ko01230//Biosynthesis of amino acids;ko01200//Carbon metabolism;ko00270//Cysteine and methionine metabolism;ko00260//Glycine, serine and threonine metabolism;ko00630//Glyoxylate and dicarboxylate metabolism;ko00030//Pentose phosphate pathway;ko00710//Carbon fixation in …	Amino acid metabolism;Carbohydrate metabolism;Energy metabolism;Global and overview maps;Lipid metabolism	Metabolism
Com_174_neg	down	0.000303864	0.00381053	1.02523	3-O-Feruloylquinic acid	Alcohols and polyols	NEG	368.335	C17H20O9	5.55	-	-	-
Com_917_pos	down	0.0355308	0.0835552	1.02875	LPC(1-acyl 18:2)	Phospholipid	POS	519.65	C26H50NO7P	12.18	-	-	-
Com_143_neg	down	1.23515e-05	0.00064667	1.28187	Succinic acid	Tca Cycle	NEG	118.09	C4H6O4	1.936	ko01100//Metabolic pathways;ko01110//Biosynthesis of secondary metabolites;ko01120//Microbial metabolism in diverse environments;ko01200//Carbon metabolism;ko00310//Lysine degradation;ko00630//Glyoxylate and dicarboxylate metabolism;ko00760//Nicotinate and nicotinamide metabolism;ko00250//Alanine, aspartate and glutamate metabolism;ko00020//Citrate cycle (TCA cycle);ko01220//Degradation of aromat…	Amino acid metabolism;Carbohydrate metabolism;Energy metabolism;Global and overview maps;Metabolism of cofactors and vitamins	Metabolism
Com_976_pos	down	0.0171982	0.0728107	1.14405	2-Phenylglycine	Amino Acid And Derivatives	POS	151.163	C8H9NO2	2.78	-	-	-
Com_899_pos	down	0.0149138	0.0485701	1.27602	VitaMin U	Vitamins	POS	199.7	C6H14ClNO2S	0.75	-	-	-
Com_268_neg	down	0.0023405	0.012641	2.24451	Coniferin	Carbohydrates And Its Derivatives	NEG	342.132	C16H22O8	0.97	ko01110//Biosynthesis of secondary metabolites;ko00940//Phenylpropanoid biosynthesis	Biosynthesis of other secondary metabolites;Global and overview maps	Metabolism
Com_650_pos	down	0.000755526	0.00619758	1.17336	O-Phosphocholine	Cholines	POS	219.604	C5H15ClNO4P	0.87	ko01100//Metabolic pathways;ko00564//Glycerophospholipid metabolism	Global and overview maps;Lipid metabolism	Metabolism
Com_980_pos	down	0.0185949	0.0765549	1.1341	2-Hydroxy-6-Aminopurine	Purines and purine derivatives	POS	151.126	C5H5N5O	2.76	-	-	-
Com_839_pos	down	0.000448887	0.00794002	1.11559	1-Methylpiperidine-2-carboxylic acid	Amino Acid And Derivatives	POS	143.095	C7H13NO2	0.99	-	-	-
Com_740_pos	down	0.0224481	0.0842909	1.10984	Acetaminophen	Phenols And Its Derivatives	POS	151.163	C8H9NO2	2.76	-	-	-
Com_766_pos	down	0.0252642	0.0650076	1.29073	LysoPC 18:2 (2n isomer)	Phospholipid	POS	519	C26H50NO7P	11.95	-	-	-
Com_215_neg	down	0.00249382	0.0850238	1.10533	D-Histidine	Amino Acid And Derivatives	NEG	155.155	C6H9N3O2	0.81	ko01100//Metabolic pathways	Global and overview maps	Metabolism
Com_782_pos	down	0.0103596	0.0355037	1.13759	2-alpha-Linolenoyl-glycerol	Glycerolipids	POS	352.261	C21H36O4	11.17	-	-	-
Com_832_pos	down	0.0222512	0.0971043	1.94399	Luteolin-4'-O-glucoside	Flavonoids	POS	448.101	C21H20O11	6.8	-	-	-
Com_308_neg	down	0.00323313	0.0826112	1.1414	Cyclic AMP	Nucleotide And Its Derivates	NEG	329.206	C10H12N5O6P	1.75	ko01100//Metabolic pathways;ko00230//Purine metabolism	Global and overview maps;Nucleotide metabolism	Metabolism
Com_476_pos	down	0.000434422	0.00472495	1.79558	L-Methionine sulfone	Amino Acid And Derivatives	POS	181.21	C5H11NO4S	1.84	-	-	-
Com_703_pos	down	0.000620322	0.0134592	1.00631	Pyridoxine	Vitamins	POS	169.178	C8H11NO3	1.53	ko01100//Metabolic pathways;ko01120//Microbial metabolism in diverse environments;ko00750//Vitamin B6 metabolism	Global and overview maps;Metabolism of cofactors and vitamins	Metabolism
Com_147_neg	down	0.00684063	0.0777409	1.44991	D-Galactaric acid	Carbohydrates And Its Derivatives	NEG	210.038	C6H10O8	0.87	ko01100//Metabolic pathways;ko00053//Ascorbate and aldarate metabolism	Carbohydrate metabolism;Global and overview maps	Metabolism
Com_1008_pos	down	0.00348114	0.0135867	1.15046	2-Deoxy-D-galactose	Carbohydrates And Its Derivatives	POS	164.156	C6H12O5	0.69	-	-	-
Com_250_neg	down	0.00109543	0.0398372	1.16234	2,6-Dihydroxybenzoic acid	Benzoic acids and derivatives	NEG	154.12	C7H6O4	6.13	-	-	-
Com_734_pos	down	7.96217e-05	0.00206861	2.72537	(S)-2-Phenyloxirane	Benzene and substituted derivatives	POS	120.058	C8H8O	2.01	-	-	-
Com_728_pos	down	0.000643901	0.00557537	3.8633	isoleucine	Amino Acid And Derivatives	POS	131.17	C6H13NO2	2.11	-	-	-
Com_877_pos	down	5.85591e-05	0.00168149	1.09114	Tyramine	Benzene and substituted derivatives	POS	137.179	C8H11NO	2	ko01100//Metabolic pathways;ko01110//Biosynthesis of secondary metabolites;ko00350//Tyrosine metabolism;ko00950//Isoquinoline alkaloid biosynthesis	Amino acid metabolism;Biosynthesis of other secondary metabolites;Global and overview maps	Metabolism
Com_838_pos	down	2.63575e-05	0.00119817	2.18986	Phenylethanolamine	Amines	POS	137.084	C8H11NO	2	-	-	-
Com_401_neg	down	0.000159389	0.00280473	2.52264	Isomaltulose	Carbohydrates And Its Derivatives	NEG	342.116	C12H22O11	0.97	-	-	-
Com_783_pos	down	0.00194727	0.0112406	3.50491	Turanose	Carbohydrates And Its Derivatives	POS	364.078	C12H21O11Na	0.95	-	-	-
Com_863_pos	down	0.000365017	0.00420237	1.16153	trans-3-Hydroxy-L-proline	Amino Acid And Derivatives	POS	131.13	C5H9NO3	2.14	ko01100//Metabolic pathways;ko00330//Arginine and proline metabolism	Amino acid metabolism;Global and overview maps	Metabolism
Com_438_neg	down	5.85672e-05	0.00168149	1.55409	Sucrose	Carbohydrates And Its Derivatives	NEG	342.116	C12H22O11	0.98	ko01100//Metabolic pathways;ko01110//Biosynthesis of secondary metabolites;ko02010//ABC transporters;ko00052//Galactose metabolism;ko00500//Starch and sucrose metabolism	Carbohydrate metabolism;Global and overview maps;Membrane transport	Environmental Information Processing;Metabolism
Com_888_pos	down	0.000221928	0.00343521	1.09159	6-Aminocaproic acid	Fatty Acyls	POS	131.095	C6H13NO2	2.07	ko01100//Metabolic pathways;ko01120//Microbial metabolism in diverse environments	Global and overview maps	Metabolism
Com_528_pos	down	0.000792687	0.00638967	1.39423	Histidine	Amino Acid And Derivatives	POS	155.15	C6H9N3O2	0.81	-	-	-
Com_238_neg	down	0.024825	0.366436	1.27915	Raffinose	Carbohydrates And Its Derivatives	NEG	504.437	C18H32O16	1.009	ko01100//Metabolic pathways;ko02010//ABC transporters;ko00052//Galactose metabolism	Carbohydrate metabolism;Global and overview maps;Membrane transport	Environmental Information Processing;Metabolism
Com_184_neg	down	0.000548696	0.00503146	1.7642	alpha,alpha-Trehalose	Carbohydrates And Its Derivatives	NEG	342.296	C12H22O11	0.962	ko01100//Metabolic pathways;ko01110//Biosynthesis of secondary metabolites;ko02010//ABC transporters;ko00500//Starch and sucrose metabolism	Carbohydrate metabolism;Global and overview maps;Membrane transport	Environmental Information Processing;Metabolism
Com_436_neg	down	2.82717e-05	0.00121036	2.83702	Galactinol	Carbohydrates And Its Derivatives	NEG	342.116	C12H22O11	0.99	ko01100//Metabolic pathways;ko00052//Galactose metabolism	Carbohydrate metabolism;Global and overview maps	Metabolism
Com_784_pos	down	0.0208326	0.129139	1.02366	Acetylcholine	Cholines	POS	146.118	C7H16NO2	1.02	ko00564//Glycerophospholipid metabolism	Lipid metabolism	Metabolism
Com_801_pos	down	0.000671664	0.00564336	1.10248	iP7G	Phytohormones	POS	365.2	C16H23N5O5	1	-	-	-
Com_102_neg	down	0.00782715	0.0288494	2.01695	Melibiose	Carbohydrates And Its Derivatives	NEG	342.3	C12H22O11	0.96	ko01100//Metabolic pathways;ko02010//ABC transporters;ko00052//Galactose metabolism	Carbohydrate metabolism;Global and overview maps;Membrane transport	Environmental Information Processing;Metabolism
Com_731_pos	down	0.000347504	0.00412094	3.79383	L-Leucine	Amino Acid And Derivatives	POS	131.17	C6H13NO2	2.32	ko01100//Metabolic pathways;ko01110//Biosynthesis of secondary metabolites;ko01230//Biosynthesis of amino acids;ko02010//ABC transporters;ko00970//Aminoacyl-tRNA biosynthesis;ko01210//2-Oxocarboxylic acid metabolism;ko00966//Glucosinolate biosynthesis;ko00280//Valine, leucine and isoleucine degradation;ko00290//Valine, leucine and isoleucine biosynthesis	Amino acid metabolism;Biosynthesis of other secondary metabolites;Global and overview maps;Membrane transport;Translation	Environmental Information Processing;Genetic Information Processing;Metabolism
Com_1078_pos	down	0.00190913	0.0111752	1.54266	Luteolin O-malonylhexoside	Flavonoids	POS	534.43	C24H22O14	7.02	-	-	-
Com_294_neg	down	0.026979	0.120139	1.40172	D-threo-Isocitric acid	Organic Acid And Its Derivatives	NEG	192.124	C6H8O7	1.41	-	-	-
Com_151_neg	down	1.30834e-05	0.00216711	1.06555	3-Ureidopropionate	Organic Acid And Its Derivatives	NEG	132.053	C4H8N2O3	0.82	ko01100//Metabolic pathways;ko00240//Pyrimidine metabolism;ko00410//beta-Alanine metabolism;ko00770//Pantothenate and CoA biosynthesis	Global and overview maps;Metabolism of cofactors and vitamins;Metabolism of other amino acids;Nucleotide metabolism	Metabolism
Com_564_pos	down	0.0201637	0.0561187	2.70556	Melezitose	Carbohydrates And Its Derivatives	POS	504.44	C18H32O16	0.998	-	-	-
Com_1093_pos	down	0.000252005	0.00343672	4.59074	L-Phenylalanine	Amino Acid And Derivatives	POS	165.19	C9H11NO2	4.108	ko01100//Metabolic pathways;ko01110//Biosynthesis of secondary metabolites;ko01230//Biosynthesis of amino acids;ko02010//ABC transporters;ko00970//Aminoacyl-tRNA biosynthesis;ko01210//2-Oxocarboxylic acid metabolism;ko00940//Phenylpropanoid biosynthesis;ko00400//Phenylalanine, tyrosine and tryptophan biosynthesis;ko00960//Tropane, piperidine and pyridine alkaloid biosynthesis;ko00460//Cyanoamino …	Amino acid metabolism;Biosynthesis of other secondary metabolites;Global and overview maps;Membrane transport;Metabolism of other amino acids;Translation	Environmental Information Processing;Genetic Information Processing;Metabolism
Com_394_neg	down	0.00237973	0.0127269	1.2879	Scutellarin	Flavonoids	NEG	462.36	C21H18O12	6.59	-	-	-
Com_836_pos	down	0.00506573	0.0365737	1.05197	alpha-Ionone	Terpenoids	POS	192.297	C13H20O	1.86	-	-	-
Com_733_pos	down	0.00487977	0.0360918	1.01423	6-Deoxyfagomine	Alkaloids and derivatives	POS	131.095	C6H13NO2	2.06	-	-	-
Com_682_pos	down	0.000229267	0.00343521	4.21736	HBOA	Organoheterocyclic compounds	POS	165.042	C8H7NO3	4.15	ko01110//Biosynthesis of secondary metabolites;ko00402//Benzoxazinoid biosynthesis	Biosynthesis of other secondary metabolites;Global and overview maps	Metabolism
Com_775_pos	down	0.000203964	0.00337159	4.5395	D-Phenylalanine	Amino Acid And Derivatives	POS	165.19	C9H11NO2	4.106	ko01100//Metabolic pathways;ko00360//Phenylalanine metabolism	Amino acid metabolism;Global and overview maps	Metabolism
Com_572_pos	down	0.000112687	0.00250901	2.54843	7-methylguanine	Purines and purine derivatives	POS	165.065	C6H7N5O	4.11	-	-	-
Com_843_pos	down	0.00323085	0.0156707	1.01306	MAG (18:3)	Glycerolipids	POS	352.2	C21H36O4	12.12	-	-	-
Com_779_pos	down	0.0184501	0.0762466	1.35369	2-Amino-4-(methylthio)butyric acid	Amino Acid And Derivatives	POS	149.211	C5H11NO2S	1.46	-	-	-
Com_379_neg	down	0.000548827	0.0105636	2.54644	Rhoifolin	Flavonoids	NEG	578.52	C27H30O14	6.94	ko00944//Flavone and flavonol biosynthesis	Biosynthesis of other secondary metabolites	Metabolism
Com_763_pos	down	0.00178164	0.0106217	2.26497	LysoPC 18:3 (2n isomer)	Phospholipid	POS	517.2	C26H48NO7P	11.33	-	-	-
Com_496_pos	down	2.07636e-05	0.00323615	1.69211	Chrysoeriol 7-O-rutinoside	Flavonoids	POS	608.545	C28H32O15	6.94	-	-	-
Com_860_pos	down	0.00454986	0.0357115	1.00719	Paeonol	Ketones	POS	166.177	C9H10O3	4.08	-	-	-
Com_861_pos	down	0.000572817	0.0105923	1.13893	Neodiosmin	Flavones and Flavonols	POS	608.545	C28H32O15	7.12	-	-	-
Com_1025_pos	down	0.01745	0.143143	1.07281	Scopoletin	Coumarins and derivatives	POS	192.17	C10H8O4	6.933	ko01110//Biosynthesis of secondary metabolites	Global and overview maps	Metabolism
Com_692_pos	down	0.0199282	0.182703	1.25938	O-Feruloyl coumarin	Cinnamic acids and derivatives	POS	322.317	C19H14O5	5.6	-	-	-
Com_1054_pos	down	0.000756356	0.0147876	1.30489	Cyanidin O-rutinoside	Anthocyanins	POS	595.52	C27H31O15	6.66	-	-	-
Com_222_neg	down	0.000894018	0.0250096	1.04294	DL-o-Tyrosine	Amino Acid And Derivatives	NEG	181.189	C9H11NO3	1.81	-	-	-
Com_40_neg	down	0.00113783	0.0163339	1.15548	Cyanidin O-acetylhexoside	Anthocyanins	NEG	490.1	C23H22O12	7.12	-	-	-
Com_621_pos	down	0.000231033	0.00343521	2.16132	Dl-Indole-3-lactic acid	Indoles and derivatives	POS	205.21	C11H11NO3	4.87	-	-	-
Com_637_pos	down	0.000465227	0.00483393	1.81346	L-Tryptophan	Amino Acid And Derivatives	POS	204.23	C11H12N2O2	4.894	ko01100//Metabolic pathways;ko01110//Biosynthesis of secondary metabolites;ko01230//Biosynthesis of amino acids;ko00970//Aminoacyl-tRNA biosynthesis;ko01210//2-Oxocarboxylic acid metabolism;ko00260//Glycine, serine and threonine metabolism;ko00380//Tryptophan metabolism;ko00400//Phenylalanine, tyrosine and tryptophan biosynthesis;ko00966//Glucosinolate biosynthesis;ko00901//Indole alkaloid biosyn…	Amino acid metabolism;Biosynthesis of other secondary metabolites;Global and overview maps;Translation	Genetic Information Processing;Metabolism
Com_735_pos	down	0.0319447	0.129541	1.46251	Zarzissine	Organoheterocyclic compounds	POS	135.054	C5H5N5	1.83	-	-	-
Com_617_pos	down	0.0485561	0.161131	1.50836	Caffeic aldehyde	Phenylpropanoids and polyketides	POS	164.1	C9H8O3	1.84	ko01110//Biosynthesis of secondary metabolites;ko00940//Phenylpropanoid biosynthesis	Biosynthesis of other secondary metabolites;Global and overview maps	Metabolism
Com_905_pos	down	0.00254173	0.0297407	1.09447	beta-Nicotyrine	Alkaloids and derivatives	POS	158.2	C10H10N2	4.91	-	-	-
Com_1060_pos	down	0.0201264	0.107637	1.54037	Leucine	Amino Acid And Derivatives	POS	131.175	C6H13NO2	2.1	-	-	-
Com_64_neg	down	0.00179414	0.0303341	1.03706	Glucosylvitexin	Flavonoids	NEG	594.526	C27H30O15	6.25	-	-	-
Com_792_pos	down	0.00387749	0.0205648	1.03342	L-Valine	Amino Acid And Derivatives	POS	117.146	C5H11NO2	1.2	ko01100//Metabolic pathways;ko01110//Biosynthesis of secondary metabolites;ko01230//Biosynthesis of amino acids;ko02010//ABC transporters;ko00970//Aminoacyl-tRNA biosynthesis;ko01210//2-Oxocarboxylic acid metabolism;ko00770//Pantothenate and CoA biosynthesis;ko00460//Cyanoamino acid metabolism;ko00966//Glucosinolate biosynthesis;ko00280//Valine, leucine and isoleucine degradation;ko00290//Valine,…	Amino acid metabolism;Biosynthesis of other secondary metabolites;Global and overview maps;Membrane transport;Metabolism of cofactors and vitamins;Metabolism of other amino acids;Translation	Environmental Information Processing;Genetic Information Processing;Metabolism
Com_953_pos	down	7.39028e-07	0.00040314	1.06858	p-Nitroaniline	Benzene and substituted derivatives	POS	138.124	C6H6N2O2	2.02	-	-	-
Com_622_pos	down	0.026002	0.11771	1.26505	DL-Leucine	Amino Acid And Derivatives	POS	131.173	C6H13NO2	2.3	-	-	-
Com_1062_pos	down	0.00544847	0.0379071	1.1502	vasicine	Alkaloids and derivatives	POS	188.229	C11H12N2O	4.86	-	-	-
Com_347_neg	down	0.0016432	0.0136992	1.39947	L-Proline	Amino Acid And Derivatives	NEG	115.131	C5H9NO2	0.94	ko01100//Metabolic pathways;ko01110//Biosynthesis of secondary metabolites;ko01230//Biosynthesis of amino acids;ko02010//ABC transporters;ko00330//Arginine and proline metabolism;ko00970//Aminoacyl-tRNA biosynthesis;ko00332//Carbapenem biosynthesis	Amino acid metabolism;Biosynthesis of other secondary metabolites;Global and overview maps;Membrane transport;Translation	Environmental Information Processing;Genetic Information Processing;Metabolism
Com_493_pos	down	0.0160228	0.0976587	1.53426	Maleic acid	Organic Acid And Its Derivatives	POS	116.011	C4H4O4	0.96	ko01100//Metabolic pathways;ko01120//Microbial metabolism in diverse environments;ko00760//Nicotinate and nicotinamide metabolism;ko00350//Tyrosine metabolism;ko00650//Butanoate metabolism	Amino acid metabolism;Carbohydrate metabolism;Global and overview maps;Metabolism of cofactors and vitamins	Metabolism
Com_5_neg	down	0.000609683	0.00794002	1.08069	L-Histidine	Amino Acid And Derivatives	NEG	155.15	C6H9N3O2	0.76	ko01100//Metabolic pathways;ko01110//Biosynthesis of secondary metabolites;ko01230//Biosynthesis of amino acids;ko02010//ABC transporters;ko00970//Aminoacyl-tRNA biosynthesis;ko00340//Histidine metabolism;ko00410//beta-Alanine metabolism	Amino acid metabolism;Global and overview maps;Membrane transport;Metabolism of other amino acids;Translation	Environmental Information Processing;Genetic Information Processing;Metabolism
Com_741_pos	down	0.0319733	0.129541	1.21425	Benzamidine	Benzene and substituted derivatives	POS	120.152	C7H8N2	4.09	-	-	-
Com_395_neg	down	0.00363888	0.0562164	1.36973	Rutin hydrate	Flavonoids	NEG	610.52	C27H30O16.xH2O	6.36	-	-	-
Com_955_pos	down	0.00224275	0.0161243	1.16988	1,2-Benzenedicarboxylic acid	Benzoic acids and derivatives	POS	166.131	C8H6O4	4.11	ko01100//Metabolic pathways;ko01120//Microbial metabolism in diverse environments;ko02010//ABC transporters;ko01220//Degradation of aromatic compounds	Global and overview maps;Membrane transport	Environmental Information Processing;Metabolism
Com_939_pos	down	0.0183434	0.0552836	1.14428	IAA-Asp	Phytohormones	POS	290.271	C14H14N2O5	6.78	-	-	-
Com_1100_pos	down	0.02727	0.120391	1.17161	Indole	Indoles and derivatives	POS	117.148	C8H7N	4.87	ko01100//Metabolic pathways;ko01110//Biosynthesis of secondary metabolites;ko00380//Tryptophan metabolism;ko00400//Phenylalanine, tyrosine and tryptophan biosynthesis;ko00402//Benzoxazinoid biosynthesis	Amino acid metabolism;Biosynthesis of other secondary metabolites;Global and overview maps	Metabolism
Com_781_pos	down	0.0115208	0.0832396	1.17249	L-2-Aminoadipic acid	Amino Acid And Derivatives	POS	161.069	C6H11NO4	0.93	ko01100//Metabolic pathways;ko01110//Biosynthesis of secondary metabolites;ko01230//Biosynthesis of amino acids;ko01210//2-Oxocarboxylic acid metabolism;ko00310//Lysine degradation;ko00300//Lysine biosynthesis	Amino acid metabolism;Global and overview maps	Metabolism
Com_658_pos	down	0.0295843	0.125589	1.46858	2-Aminoadipic acid	Amino Acid And Derivatives	POS	161.1	C6H11NO4	0.95	ko01100//Metabolic pathways;ko01110//Biosynthesis of secondary metabolites;ko01230//Biosynthesis of amino acids;ko01210//2-Oxocarboxylic acid metabolism;ko00310//Lysine degradation;ko00300//Lysine biosynthesis	Amino acid metabolism;Global and overview maps	Metabolism
Com_223_neg	down	3.36355e-05	0.0028228	1.35755	alpha-Amino-beta-(3-indolyl)-propionic acid	Amino Acid And Derivatives	NEG	204.225	C11H12N2O2	4.91	-	-	-
Com_968_pos	down	0.0353202	0.118933	1.09824	4'-O-Glucosylvitexin	Flavonoids	POS	594.518	C27H30O15	6.28	-	-	-
Com_112_neg	down	0.0010734	0.0247153	1.16901	Acetyl tryptophan	Amino Acid And Derivatives	NEG	246	C13H14N2O3	6.78	-	-	-
Com_463_neg	down	0.0161985	0.0514421	1.13478	N-Acetyl-L-Tryptophan	Amino Acid And Derivatives	NEG	246.1	C13H14N2O3	6.72	-	-	-
