# Supplementary material for: Comparative Metabolomic Studies of Siberian Wildrye (Elymus sibiricus L.): A New Look at the Mechanism of Plant Drought Resistance
Source: Int J Mol Sci. 2022 Dec 27;24(1):452. doi: 10.3390/ijms24010452 (PMC9820681; doi:10.3390/ijms24010452)
Supplement: Supplementary file 1 [file ijms-24-00452-s001.zip › Table S4.xlsx]

## Sheet: Sheet1
Table S4. The DMs between the two genotypes (X vs W) were compared.
index	Up/Down	Pvalue	fdr	vip	Compounds	Class	Ion mode	Molecular Weight (Da)	Formula	RT	CAS	HMDB	C_ID	Pathway	KEGG_B_class	KEGG_A_class
Com_755_pos	Up	1.99817e-07	4.95456e-06	2.74472	C-pentosyl-chrysoeriol O-hexoside	Flavonoids	POS	594.526	C27H30O15	6.04	--	--	-	-	-	-
Com_37_neg	Up	2.33875e-11	2.12632e-09	7.09379	Chrysoeriol 8-C-pentosyl-O-rutinoside	Flavonoids	NEG	740.2	C33H40O19	6.18	--	--	-	-	-	-
Com_316_neg	Up	5.2734e-12	5.75328e-10	3.47307	Kaempferol 3-O-robinobioside	Flavones and Flavonols	NEG	594.159	C27H30O15	6.55	--	--	-	-	-	-
Com_394_neg	Up	1.30756e-07	3.65781e-06	1.53462	Scutellarin	Flavonoids	NEG	462.36	C21H18O12	6.59	--	--	-	-	-	-
Com_163_neg	Up	1.32003e-09	6.85786e-08	3.4256	Saponarin	Flavonoids	NEG	594.518	C27H30O15	6.27	-	HMDB0257484	-	-	-	-
Com_513_pos	Up	1.36349e-06	2.51854e-05	1.40469	Cyanidin 3-O-malonylhexoside	Anthocyanins	POS	535.1	C24H23O14	6.73	--	--	-	-	-	-
Com_1078_pos	Up	3.86245e-06	5.54735e-05	2.64968	Luteolin O-malonylhexoside	Flavonoids	POS	534.43	C24H22O14	7.02	--	--	-	-	-	-
Com_995_pos	Up	1.64443e-08	4.98354e-07	3.03253	Kaempferol-3-O-rutinoside	Flavonoids	POS	594.526	C27H30O15	6.51	17297-56-2	HMDB0037574	C21833	ko01110//Biosynthesis of secondary metabolites;ko00944//Flavone and flavonol biosynthesis	Biosynthesis of other secondary metabolites;Global and overview maps	Metabolism
Com_877_pos	Up	1.834e-06	3.20748e-05	2.04489	Tyramine	Benzene and substituted derivatives	POS	137.179	C8H11NO	2	51-67-2	HMDB0000306	C00483	ko01100//Metabolic pathways;ko01110//Biosynthesis of secondary metabolites;ko00350//Tyrosine metabolism;ko00950//Isoquinoline alkaloid biosynthesis	Amino acid metabolism;Biosynthesis of other secondary metabolites;Global and overview maps	Metabolism
Com_838_pos	Up	1.88391e-06	3.20748e-05	4.02669	Phenylethanolamine	Amines	POS	137.084	C8H11NO	2	-	HMDB0062626	-	-	-	-
Com_734_pos	Up	1.89534e-06	3.20748e-05	5.08763	(S)-2-Phenyloxirane	Benzene and substituted derivatives	POS	120.058	C8H8O	2.01	--	--	-	-	-	-
Com_247_neg	Up	1.10524e-06	2.08899e-05	2.77395	Lonicerin	Flavonoids	NEG	594.526	C27H30O15	6.73	25694-72-8	HMDB0005799	-	-	-	-
Com_496_pos	Up	4.04351e-09	1.63388e-07	2.70657	Chrysoeriol 7-O-rutinoside	Flavonoids	POS	608.545	C28H32O15	6.94	--	--	-	-	-	-
Com_861_pos	Up	1.11214e-08	3.67679e-07	1.84	Neodiosmin	Flavones and Flavonols	POS	608.545	C28H32O15	7.12	-	HMDB0039857	-	-	-	-
Com_1054_pos	Up	1.72496e-07	4.55711e-06	1.26152	Cyanidin O-rutinoside	Anthocyanins	POS	595.52	C27H31O15	6.66	--	--	-	-	-	-
Com_881_pos	Up	1.21459e-08	3.89018e-07	1.64963	C-hexosyl-luteolin O-hexoside	Flavonoids	POS	610.518	C27H30O16	5.68	--	--	-	-	-	-
Com_1004_pos	Up	2.95584e-06	4.59358e-05	1.19733	Chrysoeriol O-malonylhexoside	Flavonoids	POS	548.457	C25H24O14	7.51	--	--	-	-	-	-
Com_381_neg	Up	1.83371e-12	2.50073e-10	3.77462	Isorhoifolin	Flavonoids	NEG	578.52	C27H30O14	6.84	552-57-8	HMDB0037349	-	-	-	-
Com_41_neg	Up	3.15751e-08	9.06538e-07	2.32956	Chrysoeriol 6-C-pentosyl-O-rutinoside	Flavonoids	NEG	741.1	C33H40O19	6.08	--	--	-	-	-	-
Com_379_neg	Up	6.29011e-10	4.03677e-08	3.43707	Rhoifolin	Flavonoids	NEG	578.52	C27H30O14	6.94	-	HMDB0303149	C12627	ko00944//Flavone and flavonol biosynthesis	Biosynthesis of other secondary metabolites	Metabolism
Com_448_neg	Up	2.37822e-13	3.70663e-11	2.51058	Tricin 5-O-rutinoside	Flavonoids	NEG	638.1	C29H34O16	6.88	--	--	-	-	-	-
Com_335_neg	Up	4.23874e-07	9.24892e-06	1.58237	Vitexin-2-O-rhaMnoside	Flavonoids	NEG	578.52	C27H30O14	6.411	--	--	-	-	-	-
Com_174_neg	Up	1.57364e-07	4.29211e-06	1.52526	3-O-Feruloylquinic acid	Alcohols and polyols	NEG	368.335	C17H20O9	5.55	62929-69-5	HMDB0030669	-	-	-	-
Com_350_neg	Up	1.75434e-07	4.55711e-06	1.24259	Chlorogenic acid methyl ester	Alcohols and polyols	NEG	368.111	C17H20O9	5.7	--	--	-	-	-	-
Com_703_pos	Up	0.000500648	0.00384653	1.07455	Pyridoxine	Vitamins	POS	169.178	C8H11NO3	1.53	58-56-0	HMDB0301760	C00314	ko01100//Metabolic pathways;ko01120//Microbial metabolism in diverse environments;ko00750//Vitamin B6 metabolism	Global and overview maps;Metabolism of cofactors and vitamins	Metabolism
Com_779_pos	Up	0.00333015	0.0176369	1.67309	2-Amino-4-(methylthio)butyric acid	Amino Acid And Derivatives	POS	149.211	C5H11NO2S	1.46	59-51-8	HMDB0033951	-	-	-	-
Com_1069_pos	Up	0.0184523	0.0680117	1.01466	L-Methionine	Amino Acid And Derivatives	POS	149.212	C5H11NO2S	1.38	59-51-8	HMDB0033951	C00073	ko01100//Metabolic pathways;ko01110//Biosynthesis of secondary metabolites;ko01230//Biosynthesis of amino acids;ko00270//Cysteine and methionine metabolism;ko00970//Aminoacyl-tRNA biosynthesis;ko01210//2-Oxocarboxylic acid metabolism;ko00966//Glucosinolate biosynthesis	Amino acid metabolism;Biosynthesis of other secondary metabolites;Global and overview maps;Translation	Genetic Information Processing;Metabolism
Com_832_pos	Up	0.00134531	0.00858322	1.09249	Luteolin-4'-O-glucoside	Flavonoids	POS	448.101	C21H20O11	6.8	--	--	-	-	-	-
Com_738_pos	Up	0.00534856	0.0254815	1.10482	4-Hydroxymandelonitrile	Phenols And Its Derivatives	POS	149.048	C8H7NO2	1.44	71807-09-5	HMDB0060318	-	-	-	-
Com_839_pos	Up	0.000719148	0.00519596	1.58837	1-Methylpiperidine-2-carboxylic acid	Amino Acid And Derivatives	POS	143.095	C7H13NO2	0.99	--	--	-	-	-	-
Com_737_pos	Up	0.00058883	0.00437016	1.98346	D-Proline betaine	Amino Acid And Derivatives	POS	144.092	C7H14NO2+	1	--	--	-	-	-	-
Com_1084_pos	Up	8.62736e-05	0.000871523	1.02189	(-)-Norepinephrine N-hexoside	Glycosides	POS	331.32	C14H21NO8	1.05	--	--	-	-	-	-
Com_709_pos	Up	0.000932563	0.00635891	2.52589	C-hexosyl-apigenin C-pentoside	Flavonoids	POS	564.1	C26H28O14	6.07	--	--	-	-	-	-
Com_412_neg	Up	0.000168564	0.00148309	3.89796	Neochlorogenic acid	Polyphenol	NEG	354.309	C16H18O9	4.879	-	HMDB0240477	-	-	-	-
Com_330_neg	Up	0.000123687	0.0011633	1.04342	Eicosadienoic acid	Fatty Acyls	NEG	308.272	C20H36O2	6.32	5598-38-9	HMDB0005060	C16525	ko01040//Biosynthesis of unsaturated fatty acids	Lipid metabolism	Metabolism
Com_545_pos	Up	0.00240589	0.0139819	2.76467	C-pentosyl-C-hexosyl-apigenin	Flavonoids	POS	564.49	C26H28O14	6.05	--	--	-	-	-	-
Com_308_neg	Up	0.000117535	0.00113479	1.12019	Cyclic AMP	Nucleotide And Its Derivates	NEG	329.206	C10H12N5O6P	1.75	60-92-4	HMDB0000058	C00575	ko01100//Metabolic pathways;ko00230//Purine metabolism	Global and overview maps;Nucleotide metabolism	Metabolism
Com_139_neg	Up	0.00110655	0.00731666	1.12543	UDP-galactose	Nucleotide And Its Derivates	NEG	610.265	C15H22N2Na2O17P2	0.92	1955-26-6	HMDB0012305	C00052	ko01100//Metabolic pathways;ko00052//Galactose metabolism;ko00520//Amino sugar and nucleotide sugar metabolism	Carbohydrate metabolism;Global and overview maps	Metabolism
Com_510_pos	Up	0.00136537	0.00861049	4.40828	Schaftoside	Flavones and Flavonols	POS	564.492	C26H28O14	6.074	207461-10-7	HMDB0033571	-	-	-	-
Com_9_neg	Up	0.000223084	0.00190145	5.20604	Isoschaftoside	Flavones and Flavonols	NEG	564.499	C26H28O14	6.03	--	--	-	-	-	-
Com_773_pos	Up	0.00468142	0.0231105	1.1023	Nicotinamide	Vitamins	POS	122.12	C6H6N2O	1.539	98-92-0	HMDB0001406	C00153	ko01100//Metabolic pathways;ko00760//Nicotinate and nicotinamide metabolism	Global and overview maps;Metabolism of cofactors and vitamins	Metabolism
Com_770_pos	Up	1.87101e-07	4.74715e-06	3.12427	L-Dihydroorotic acid	Amino Acid And Derivatives	POS	158.112	C5H6N2O4	0.92	5988-19-2	HMDB0003349	C00337	ko01100//Metabolic pathways;ko00240//Pyrimidine metabolism	Global and overview maps;Nucleotide metabolism	Metabolism
Com_713_pos	Up	0.00858109	0.0368581	2.314	beta-Alanine methyl ester hydrochloride	Amino Acid And Derivatives	POS	139.58	C4H10ClNO2	0.98	--	--	-	-	-	-
Com_503_pos	Up	0.0127577	0.0508594	1.59706	R-Aminobutyrate	Organic Acid And Its Derivatives	POS	103.12	C4H9NO2	0.91	--	--	-	-	-	-
Com_814_pos	Up	0.0127731	0.0508594	1.08742	3-Amino-2-methylpropanoic acid	Amino Acid And Derivatives	POS	103.12	C4H9NO2	0.931	144-90-1	HMDB0003911	-	-	-	-
Com_999_pos	Up	0.00352206	0.0182979	2.45379	S-Methyl-L-cysteine	Amino Acid And Derivatives	POS	135.185	C4H9NO2S	1.04	-	HMDB0302211	C22040	ko02010//ABC transporters	Membrane transport	Environmental Information Processing
Com_726_pos	Up	0.0263691	0.0887922	2.13938	4-Aminobutyric acid	Amino Acid And Derivatives	POS	103.12	C4H9NO2	0.864	1956-12-02	HMDB0000112	C00334	ko01100//Metabolic pathways;ko01120//Microbial metabolism in diverse environments;ko00330//Arginine and proline metabolism;ko00760//Nicotinate and nicotinamide metabolism;ko00250//Alanine, aspartate and glutamate metabolism;ko00410//beta-Alanine metabolism;ko00650//Butanoate metabolism	Amino acid metabolism;Carbohydrate metabolism;Global and overview maps;Metabolism of cofactors and vitamins;Metabolism of other amino acids	Metabolism
Com_817_pos	Down	0.0310374	0.100779	2.45703	L-Glutamic acid	Amino Acid And Derivatives	POS	147.13	C5H9NO4	0.886	-	HMDB0060475	C00025	ko01100//Metabolic pathways;ko01110//Biosynthesis of secondary metabolites;ko01120//Microbial metabolism in diverse environments;ko01230//Biosynthesis of amino acids;ko02010//ABC transporters;ko01200//Carbon metabolism;ko00330//Arginine and proline metabolism;ko00970//Aminoacyl-tRNA biosynthesis;ko01210//2-Oxocarboxylic acid metabolism;ko00630//Glyoxylate and dicarboxylate metabolism;ko00480//Glu…	Amino acid metabolism;Biosynthesis of other secondary metabolites;Carbohydrate metabolism;Energy metabolism;Global and overview maps;Membrane transport;Metabolism of cofactors and vitamins;Metabolism of other amino acids;Translation	Environmental Information Processing;Genetic Information Processing;Metabolism
Com_336_neg	Down	0.0218617	0.0769391	1.70806	Isoorientin	Flavones and Flavonols	NEG	448.38	C21H20O11	6.174	-	HMDB0253666	-	-	-	-
Com_304_neg	Down	0.0140758	0.0554393	1.46378	Orientin	Flavones and Flavonols	NEG	448.377	C21H20O11	6.25	28608-75-5	HMDB0030614	-	-	-	-
Com_661_pos	Down	0.00882657	0.0377639	1.34024	Trigonelline	Alkaloids and derivatives	POS	137.136	C7H7NO2	1	535-83-1	HMDB0000875	C01004	ko00760//Nicotinate and nicotinamide metabolism	Metabolism of cofactors and vitamins	Metabolism
Com_753_pos	Down	0.0107038	0.0437373	1.50135	Luteolin C-hexoside derivative	Flavonoids	POS	448.4	C21H20O11	6.1	--	--	-	-	-	-
Com_67_neg	Down	0.000552136	0.00415435	4.24076	1-Caffeoylquinic acid	Phenolic acids	NEG	354.095	C16H18O9	5.46	-	HMDB0304633	-	-	-	-
Com_571_pos	Down	0.00479256	0.0233423	1.52163	1-O-Caffeoyl quinic acid	Alcohols and polyols	POS	354.095	C16H18O9	5.43	--	--	-	-	-	-
Com_879_pos	Down	0.000505472	0.00385643	1.1219	Tricin O-malonylhexoside	Flavonoids	POS	578.47	C26H26O15	7.5	--	--	-	-	-	-
Com_464_neg	Down	0.00045951	0.0035809	1.072	3-O-p-Coumaroylquinic acid	Phenolic acids	NEG	338.1	C16H18O8	5.92	-	HMDB0029681	-	-	-	-
Com_533_pos	Down	5.02463e-07	1.05421e-05	1.87325	Tricin 5-O-hexoside	Flavonoids	POS	492.43	C23H24O12	7.19	--	--	-	-	-	-
Com_1012_pos	Down	8.58445e-06	0.000114215	1.28879	Tricin 7-O-hexoside	Flavonoids	POS	492.436	C23H24O12	7.63	--	--	-	-	-	-
Com_130_neg	Down	8.05743e-09	2.93022e-07	2.58139	Caffeic acid	Cinnamic acids and derivatives	NEG	180.16	C9H8O4	5.801	4361-87-9	HMDB0003501	-	-	-	-
Com_175_neg	Down	1.83777e-17	2.00501e-14	1.40797	Warfarin Sodium	Coumarins and derivatives	NEG	330.31	C19H15O4	5.56	81-81-2	HMDB0001935	-	-	-	-
Com_124_neg	Down	1.18057e-11	1.17091e-09	5.11816	Chlorogenic Acid	Alcohols and polyols	NEG	354.31	C16H18O9	5.37	202650-88-2	HMDB0003164	C00852	ko01110//Biosynthesis of secondary metabolites;ko00941//Flavonoid biosynthesis;ko00940//Phenylpropanoid biosynthesis;ko00945//Stilbenoid, diarylheptanoid and gingerol biosynthesis	Biosynthesis of other secondary metabolites;Global and overview maps	Metabolism
Com_224_neg	Down	4.01335e-11	3.12755e-09	5.88687	Cryptochlorogenic acid	Alcohols and polyols	NEG	354.309	C16H18O9	5.443	905-99-7	HMDB0030653	-	-	-	-
Com_16_neg	Down	7.40259e-10	4.44292e-08	1.82206	4-O-p-Coumaroylquinic acid	Phenolic acids	NEG	338.1	C16H18O8	5.93	-	HMDB0302093	-	-	-	-
Com_146_neg	Down	3.56138e-11	2.98882e-09	5.05587	1-O-p-Coumaroyl quinic acid	Alcohols and polyols	NEG	338.1	C16H18O8	5.95	--	--	-	-	-	-
