# Supplementary material for: Comparative Metabolomic Studies of Siberian Wildrye (Elymus sibiricus L.): A New Look at the Mechanism of Plant Drought Resistance
Source: Int J Mol Sci. 2022 Dec 27;24(1):452. doi: 10.3390/ijms24010452 (PMC9820681; doi:10.3390/ijms24010452)
Supplement: Supplementary file 1 [file ijms-24-00452-s001.zip › Table S5.xlsx]

## Sheet: Sheet1
Table S5. Candidate metabolites were identified in the turquoise and green modules.
index	moduleColors	MM.green	MM.green.pvalue	Compounds	Class	Ion mode	Molecular Weight (Da)	Formula
Com_1037_pos	green	0.986318	1.81458e-23	Lysine	Amino Acid And Derivatives	POS	146.188	C6H14N2O2
Com_125_neg	green	0.94193	8.49603e-15	Adipic acid	Organic Acid And Its Derivatives	NEG	146.058	C6H10O4
Com_153_neg	green	0.934574	4.31015e-14	(2S)-2-Isopropylmalate	Organic Acid And Its Derivatives	NEG	176.068	C7H12O5
Com_23_neg	green	0.923977	3.29894e-13	2-deoxyglucose-6-phosphate	Nucleotide And Its Derivates	NEG	244.136	C6H13O8P
Com_327_neg	green	0.946565	2.729e-15	2,2-Dimethylsuccinic acid	Organic Acid And Its Derivatives	NEG	146.058	C6H10O4
Com_363_neg	green	0.937023	2.5654e-14	L-Glutamine	Amino Acid And Derivatives	NEG	146.14	C5H10N2O3
Com_376_neg	green	0.946714	2.62646e-15	alpha-Ketoglutaric acid	Tca Cycle	NEG	146.098	C5H6O5
Com_52_neg	green	0.928279	1.49946e-13	Ureidoisobutyric acid	Organic Acid And Its Derivatives	NEG	146.069	C5H10N2O3
Com_523_pos	green	0.985488	4.11993e-23	Ala-gly	Amino Acid And Derivatives	POS	146.144	C5H10N2O3
Com_580_pos	green	0.98749	5.21792e-24	Cycloleucine	Amino Acid And Derivatives	POS	129.157	C6H11NO2
Com_620_pos	green	0.9884	1.82259e-24	Dl-Alanyl-glycine	Amino Acid And Derivatives	POS	146.144	C5H10N2O3
Com_626_pos	green	0.981009	1.73147e-21	Glutamine	Amino Acid And Derivatives	POS	146.145	C5H10N2O3
Com_670_pos	green	0.94536	3.70147e-15	DL-Citrulline	Amino Acid And Derivatives	POS	175.19	C6H13N3O3
Com_729_pos	green	0.99298	1.65605e-27	D-glutamine	Amino Acid And Derivatives	POS	146.14	C5H10N2O3
Com_730_pos	green	0.947163	2.33982e-15	L-Citrulline	Amino Acid And Derivatives	POS	175.19	C6H13N3O3
Com_898_pos	green	0.993109	1.27728e-27	DL-Glutamine	Amino Acid And Derivatives	POS	146.14	C5H10N2O3
Com_900_pos	green	0.992668	3.0362e-27	L-lysine	Amino Acid And Derivatives	POS	146.19	C6H14N2O2
Com_960_pos	green	0.94168	9.00877e-15	N-Hydroxyl-tryptamine	Amino Acid And Derivatives	POS	176.215	C10H12N2O
index	moduleColors	MM.turquoise	MM.turquoise.pvalue	Compounds	Class	Ion mode	Molecular Weight (Da)	Formula
Com_1015_pos	turquoise	0.936799	2.69276e-14	Nicotianamine	Amino Acid And Derivatives	POS	303.312	C12H21N3O6
Com_104_neg	turquoise	0.9435	5.84534e-15	D-Panthotenate	Amino Acid And Derivatives	NEG	219.235	C9H17NO5
Com_1060_pos	turquoise	0.971208	5.52416e-19	Leucine	Amino Acid And Derivatives	POS	131.175	C6H13NO2
Com_1062_pos	turquoise	0.921692	4.92319e-13	vasicine	Alkaloids and derivatives	POS	188.229	C11H12N2O
Com_1093_pos	turquoise	0.960698	4.03943e-17	L-Phenylalanine	Amino Acid And Derivatives	POS	165.19	C9H11NO2
Com_1099_pos	turquoise	0.931303	8.36005e-14	5-Methoxyindoleacetic acid	Indoles and derivatives	POS	205.21	C11H11NO3
Com_1100_pos	turquoise	0.930468	9.85028e-14	Indole	Indoles and derivatives	POS	117.148	C8H7N
Com_135_neg	turquoise	0.932227	6.95659e-14	Ureidosuccinic acid	Amino Acid And Derivatives	NEG	176.13	C5H8N2O5
Com_192_neg	turquoise	0.902444	9.45661e-12	D-2-Hydroxypentanedioic acid	Amino Acid And Derivatives	NEG	192.078	C5H6Na2O5
Com_195_neg	turquoise	0.950296	1.01374e-15	2–furanoic acid	Organic Acid And Its Derivatives	NEG	112.084	C5H4O3
Com_201_neg	turquoise	0.920343	6.20034e-13	Lactobionic acid	Carbohydrates And Its Derivatives	NEG	358.3	C12H22O12
Com_202_neg	turquoise	0.952954	4.77492e-16	Citric acid	Tca Cycle	NEG	192.12	C6H8O7
Com_21_neg	turquoise	0.960671	4.07762e-17	D-Arabinono-1,4-lactone	Carbohydrates And Its Derivatives	NEG	148.037	C5H8O5
Com_222_neg	turquoise	0.92106	5.48749e-13	DL-o-Tyrosine	Amino Acid And Derivatives	NEG	181.189	C9H11NO3
Com_287_neg	turquoise	0.909916	3.24927e-12	Creatine	Amino Acid And Derivatives	NEG	131.133	C4H9N3O2
Com_289_neg	turquoise	0.953114	4.55715e-16	D-Galacturonic acid	Carbohydrates And Its Derivatives	NEG	194.139	C6H10O7
Com_294_neg	turquoise	0.96273	1.9452e-17	D-threo-Isocitric acid	Organic Acid And Its Derivatives	NEG	192.124	C6H8O7
Com_32_neg	turquoise	0.94253	7.37341e-15	Phenprobamate	Amino Acid And Derivatives	NEG	179.216	C10H13NO2
Com_415_neg	turquoise	0.944894	4.15613e-15	D-Xylonic acid	Organic Acid And Its Derivatives	NEG	166.048	C5H10O6
Com_468_neg	turquoise	0.951934	6.40659e-16	L-Citramalic acid	Organic Acid And Its Derivatives	NEG	148.037	C5H8O5
Com_482_pos	turquoise	0.903098	8.64242e-12	Swainsonine	Alkaloids and derivatives	POS	173.21	C8H15NO3
Com_493_pos	turquoise	0.946972	2.45824e-15	Maleic acid	Organic Acid And Its Derivatives	POS	116.011	C4H4O4
Com_504_pos	turquoise	0.977156	2.24489e-20	Purine	Purines and purine derivatives	POS	120.112	C5H4N4
Com_529_pos	turquoise	0.902308	9.63525e-12	Homocysteic acid	Amino Acid And Derivatives	POS	183.18	C4H9NO5S
Com_547_pos	turquoise	0.903505	8.16955e-12	C-pentosyl-apeignin O-feruloylhexoside	Flavonoids	POS	740.66	C36H36O17
Com_552_pos	turquoise	0.985855	2.88512e-23	N-Methyl-a-aminoisobutyric acid	Amino Acid And Derivatives	POS	117.146	C5H11NO2
Com_572_pos	turquoise	0.970116	9.24316e-19	7-methylguanine	Purines and purine derivatives	POS	165.065	C6H7N5O
Com_578_pos	turquoise	0.90678	5.1433e-12	D-Homocysteine	Amino Acid And Derivatives	POS	135.185	C4H9NO2S
Com_585_pos	turquoise	0.931528	7.99606e-14	Lipoamide	Organoheterocyclic compounds	POS	205.341	C8H15NOS2
Com_599_pos	turquoise	0.974239	1.18637e-19	6-Aminohexanoic acid	Amino Acid And Derivatives	POS	131.173	C6H13NO2
Com_605_pos	turquoise	0.974013	1.33863e-19	8-Chlro-1-tetrahydronorharmanone	Indoles and derivatives	POS	220.655	C11H9ClN2O
Com_617_pos	turquoise	0.903329	8.37089e-12	Caffeic aldehyde	Phenylpropanoids and polyketides	POS	164.1	C9H8O3
Com_621_pos	turquoise	0.945037	4.01095e-15	Dl-Indole-3-lactic acid	Indoles and derivatives	POS	205.21	C11H11NO3
Com_624_pos	turquoise	0.918053	9.08786e-13	Proline	Amino Acid And Derivatives	POS	115.131	C5H9NO2
Com_625_pos	turquoise	0.979385	5.40795e-21	Valine	Amino Acid And Derivatives	POS	117.146	C5H11NO2
Com_637_pos	turquoise	0.944526	4.55143e-15	L-Tryptophan	Amino Acid And Derivatives	POS	204.23	C11H12N2O2
Com_642_pos	turquoise	0.917129	1.05702e-12	4-Pyridoxate	Pyridines and derivatives	POS	183.161	C8H9NO4
Com_655_pos	turquoise	0.924535	2.98635e-13	6-Hydroxymethylherniarin	Coumarins and derivatives	POS	206.1	C11H10O4
Com_673_pos	turquoise	0.915925	1.28384e-12	D-Proline	Amino Acid And Derivatives	POS	115.13	C5H9NO2
Com_681_pos	turquoise	0.929942	1.09106e-13	Isomangiferin	Xanthone	POS	422.085	C19H18O11
Com_682_pos	turquoise	0.954716	2.82878e-16	HBOA	Organoheterocyclic compounds	POS	165.042	C8H7NO3
Com_690_pos	turquoise	0.909113	3.66046e-12	DIMBOA glucoside	Carbohydrates And Its Derivatives	POS	374.108	C15H19NO10
Com_719_pos	turquoise	0.972413	3.05929e-19	N-Hydroxy-L-tryptophan	Amino Acid And Derivatives	POS	220.225	C11H12N2O3
Com_728_pos	turquoise	0.963896	1.25557e-17	isoleucine	Amino Acid And Derivatives	POS	131.17	C6H13NO2
Com_733_pos	turquoise	0.970444	7.93412e-19	6-Deoxyfagomine	Alkaloids and derivatives	POS	131.095	C6H13NO2
Com_735_pos	turquoise	0.915394	1.39753e-12	Zarzissine	Organoheterocyclic compounds	POS	135.054	C5H5N5
Com_741_pos	turquoise	0.969598	1.17171e-18	Benzamidine	Benzene and substituted derivatives	POS	120.152	C7H8N2
Com_775_pos	turquoise	0.961497	3.045e-17	D-Phenylalanine	Amino Acid And Derivatives	POS	165.19	C9H11NO2
Com_778_pos	turquoise	0.970532	7.61582e-19	DL-Norvaline	Amino Acid And Derivatives	POS	117.15	C5H11NO2
Com_792_pos	turquoise	0.96702	3.60471e-18	L-Valine	Amino Acid And Derivatives	POS	117.146	C5H11NO2
Com_836_pos	turquoise	0.90635	5.47087e-12	alpha-Ionone	Terpenoids	POS	192.297	C13H20O
Com_840_pos	turquoise	0.949585	1.23151e-15	N-Feruloyl-3-methoxytyramine	Phenolamides	POS	343.142	C19H21NO5
Com_860_pos	turquoise	0.968153	2.22528e-18	Paeonol	Ketones	POS	166.177	C9H10O3
Com_863_pos	turquoise	0.972055	3.65698e-19	trans-3-Hydroxy-L-proline	Amino Acid And Derivatives	POS	131.13	C5H9NO3
Com_867_pos	turquoise	0.923137	3.82769e-13	alpha-Nicotinamide adenine dinucleotide	Nucleotide And Its Derivates	POS	663.425	C21H27N7O14P2
Com_888_pos	turquoise	0.971984	3.7866e-19	6-Aminocaproic acid	Fatty Acyls	POS	131.095	C6H13NO2
Com_902_pos	turquoise	0.912316	2.26037e-12	L-Kynurenine	Carbonyl compounds	POS	208.21	C10H12N2O3
Com_904_pos	turquoise	0.918286	8.74554e-13	Phe-Phe	Amino Acid And Derivatives	POS	312.363	C18H20N2O3
Com_905_pos	turquoise	0.925444	2.53463e-13	beta-Nicotyrine	Alkaloids and derivatives	POS	158.2	C10H10N2
Com_914_pos	turquoise	0.929749	1.13236e-13	Xanthurenic acid	Quinolines and derivatives	POS	205.167	C10H7NO4
Com_924_pos	turquoise	0.914107	1.71256e-12	Nicotinic acid adenine dinucleotide	Nucleotide And Its Derivates	POS	663.2	C21H28N7O14P2
Com_938_pos	turquoise	0.912996	2.03562e-12	SDMA	Amino Acid And Derivatives	POS	202.25	C8H18N4O2
Com_955_pos	turquoise	0.966881	3.82076e-18	1,2-Benzenedicarboxylic acid	Benzoic acids and derivatives	POS	166.131	C8H6O4
Com_96_neg	turquoise	0.962692	1.97233e-17	Isocitrate	Organic Acid And Its Derivatives	NEG	192.124	C6H8O7
Com_966_pos	turquoise	0.944482	4.60152e-15	gamma-Glu-Leu	Amino Acid And Derivatives	POS	260.287	C11H20N2O5
Com_978_pos	turquoise	0.938848	1.7193e-14	N6-Succinyl Adenosine	Nucleotide And Its Derivates	POS	383.313	C14H17N5O8
Com_984_pos	turquoise	0.97065	7.20285e-19	Methionine sulfoxide	Amino Acid And Derivatives	POS	165.046	C5H11NO3S
