# Supplementary material for: Comparative Metabolomic Studies of Siberian Wildrye (Elymus sibiricus L.): A New Look at the Mechanism of Plant Drought Resistance
Source: Int J Mol Sci. 2022 Dec 27;24(1):452. doi: 10.3390/ijms24010452 (PMC9820681; doi:10.3390/ijms24010452)
Supplement: Supplementary file 1 [file ijms-24-00452-s001.zip › Table S8.xlsx]

## Sheet: Sheet1
Table S8. Metabolites were detected under both long-term and short-term drought stress in the drought-sensitive genotype (W).
index	Up/Dowm	Pvalue	Compounds	Class	Molecular Weight (Da)	Formula
Com_363_neg	down-regulated	1.24474e-05	L-Glutamine	Amino Acid And Derivatives	146.14	C5H10N2O3
Com_327_neg	down-regulated	1.26467e-06	2,2-Dimethylsuccinic acid	Organic Acid And Its Derivatives	146.058	C6H10O4
Com_125_neg	down-regulated	2.88444e-05	Adipic acid	Organic Acid And Its Derivatives	146.058	C6H10O4
Com_376_neg	down-regulated	5.54419e-06	alpha-Ketoglutaric acid	Tca Cycle	146.098	C5H6O5
Com_670_pos	down-regulated	4.51903e-06	DL-Citrulline	Amino Acid And Derivatives	175.19	C6H13N3O3
Com_523_pos	down-regulated	1.14527e-06	Ala-gly	Amino Acid And Derivatives	146.144	C5H10N2O3
Com_580_pos	down-regulated	1.90121e-06	Cycloleucine	Amino Acid And Derivatives	129.157	C6H11NO2
Com_898_pos	down-regulated	1.39936e-05	DL-Glutamine	Amino Acid And Derivatives	146.14	C5H10N2O3
Com_729_pos	down-regulated	5.25655e-06	D-glutamine	Amino Acid And Derivatives	146.14	C5H10N2O3
Com_900_pos	down-regulated	8.38468e-06	L-lysine	Amino Acid And Derivatives	146.19	C6H14N2O2
Com_1037_pos	down-regulated	1.67567e-05	Lysine	Amino Acid And Derivatives	146.188	C6H14N2O2
Com_620_pos	down-regulated	3.98608e-05	Dl-Alanyl-glycine	Amino Acid And Derivatives	146.144	C5H10N2O3
Com_626_pos	down-regulated	4.02501e-06	Glutamine	Amino Acid And Derivatives	146.145	C5H10N2O3
Com_880_pos	down-regulated	0.000431344	Kaempferol 3-O-glucoside-2‘-O-rhamnoside	Flavones and Flavonols	594.526	C27H30O15
Com_67_neg	down-regulated	0.00303961	1-Caffeoylquinic acid	Phenolic acids	354.095	C16H18O9
Com_336_neg	down-regulated	0.00760302	Isoorientin	Flavones and Flavonols	448.38	C21H20O11
Com_304_neg	down-regulated	0.0103656	Orientin	Flavones and Flavonols	448.377	C21H20O11
Com_568_pos	up-regulated	0.00141261	N-acetylglycine	Amino Acid And Derivatives	117.043	C4H7NO3
Com_787_pos	up-regulated	0.010527	2-Aminoisobutyric acid	Amino Acid And Derivatives	103.063	C4H9NO2
Com_673_pos	up-regulated	0.0272247	D-Proline	Amino Acid And Derivatives	115.13	C5H9NO2
Com_355_neg	up-regulated	0.00951651	gamma,gamma-Dimethylallyl pyrophosphate	Prenol lipids	246.092	C5H12O7P2
Com_624_pos	up-regulated	0.000372441	Proline	Amino Acid And Derivatives	115.131	C5H9NO2
Com_522_pos	up-regulated	5.24424e-05	Aspartic Acid	Amino Acid And Derivatives	133.103	C4H7NO4
Com_577_pos	up-regulated	3.84126e-05	Dl-3-Hydroxynorvaline	Amino Acid And Derivatives	133.146	C5H11NO3
Com_362_neg	up-regulated	3.63339e-06	L-Asparagine	Amino Acid And Derivatives	132.12	C4H8N2O3
Com_96_neg	up-regulated	0.0250148	Isocitrate	Organic Acid And Its Derivatives	192.124	C6H8O7
Com_669_pos	up-regulated	0.000183147	L-aspartic Acid	Amino Acid And Derivatives	133.1	C4H7NO4
Com_778_pos	up-regulated	0.000233003	DL-Norvaline	Amino Acid And Derivatives	117.15	C5H11NO2
Com_445_neg	up-regulated	0.000118716	L(-)-Malic acid	Tca Cycle	134.022	C4H6O5
Com_625_pos	up-regulated	0.000553414	Valine	Amino Acid And Derivatives	117.146	C5H11NO2
Com_552_pos	up-regulated	0.00112042	N-Methyl-a-aminoisobutyric acid	Amino Acid And Derivatives	117.146	C5H11NO2
Com_202_neg	up-regulated	0.0019089	Citric acid	Tca Cycle	192.12	C6H8O7
Com_268_neg	up-regulated	0.0023405	Coniferin	Carbohydrates And Its Derivatives	342.132	C16H22O8
Com_728_pos	up-regulated	0.000643901	isoleucine	Amino Acid And Derivatives	131.17	C6H13NO2
Com_401_neg	up-regulated	0.000159389	Isomaltulose	Carbohydrates And Its Derivatives	342.116	C12H22O11
Com_783_pos	up-regulated	0.00194727	Turanose	Carbohydrates And Its Derivatives	364.078	C12H21O11Na
Com_863_pos	up-regulated	0.000365017	trans-3-Hydroxy-L-proline	Amino Acid And Derivatives	131.13	C5H9NO3
Com_888_pos	up-regulated	0.000221928	6-Aminocaproic acid	Fatty Acyls	131.095	C6H13NO2
Com_528_pos	up-regulated	0.000792687	Histidine	Amino Acid And Derivatives	155.15	C6H9N3O2
Com_436_neg	up-regulated	2.82717e-05	Galactinol	Carbohydrates And Its Derivatives	342.116	C12H22O11
Com_102_neg	up-regulated	0.00782715	Melibiose	Carbohydrates And Its Derivatives	342.3	C12H22O11
Com_731_pos	up-regulated	0.000347504	L-Leucine	Amino Acid And Derivatives	131.17	C6H13NO2
Com_564_pos	up-regulated	0.0201637	Melezitose	Carbohydrates And Its Derivatives	504.44	C18H32O16
Com_1093_pos	up-regulated	0.000252005	L-Phenylalanine	Amino Acid And Derivatives	165.19	C9H11NO2
Com_682_pos	up-regulated	0.000229267	HBOA	Organoheterocyclic compounds	165.042	C8H7NO3
Com_775_pos	up-regulated	0.000203964	D-Phenylalanine	Amino Acid And Derivatives	165.19	C9H11NO2
Com_572_pos	up-regulated	0.000112687	7-methylguanine	Purines and purine derivatives	165.065	C6H7N5O
Com_621_pos	up-regulated	0.000231033	Dl-Indole-3-lactic acid	Indoles and derivatives	205.21	C11H11NO3
Com_637_pos	up-regulated	0.000465227	L-Tryptophan	Amino Acid And Derivatives	204.23	C11H12N2O2
